# Supplementary material
Source: publisher figshare collection journal article supplement (https://acs.figshare.com/ndownloader/files/6485970)
Supplement: Supplementary file 1 [file 6485970]

 
data_160704c 
  
_audit_creation_method            'SHELXL-2014/7' 
_shelx_SHELXL_version_number      '2014/7' 
_chemical_name_systematic         ? 
_chemical_name_common             ? 
_chemical_melting_point           ? 
_chemical_formula_moiety          ? 
_chemical_formula_sum 
 'C23 H18 O2 S' 
_chemical_formula_weight          358.43 
  
loop_ 
 _atom_type_symbol 
 _atom_type_description 
 _atom_type_scat_dispersion_real 
 _atom_type_scat_dispersion_imag 
 _atom_type_scat_source 
 'C'  'C'   0.0033   0.0016 
 'International Tables Vol C Tables 4.2.6.8 and 6.1.1.4' 
 'H'  'H'   0.0000   0.0000 
 'International Tables Vol C Tables 4.2.6.8 and 6.1.1.4' 
 'O'  'O'   0.0106   0.0060 
 'International Tables Vol C Tables 4.2.6.8 and 6.1.1.4' 
 'S'  'S'   0.1246   0.1234 
 'International Tables Vol C Tables 4.2.6.8 and 6.1.1.4' 
  
_space_group_crystal_system       orthorhombic 
_space_group_IT_number            19 
_space_group_name_H-M_alt         'P 21 21 21' 
_space_group_name_Hall            'P 2ac 2ab' 
  
_shelx_space_group_comment 
; 
The symmetry employed for this shelxl refinement is uniquely defined 
by the following loop, which should always be used as a source of 
symmetry information in preference to the above space-group names. 
They are only intended as comments. 
; 
  
loop_ 
 _space_group_symop_operation_xyz 
 'x, y, z' 
 '-x+1/2, -y, z+1/2' 
 '-x, y+1/2, -z+1/2' 
 'x+1/2, -y+1/2, -z' 
  
_cell_length_a                    9.4070(8) 
_cell_length_b                    13.2405(11) 
_cell_length_c                    15.2351(14) 
_cell_angle_alpha                 90 
_cell_angle_beta                  90 
_cell_angle_gamma                 90 
_cell_volume                      1897.6(3) 
_cell_formula_units_Z             4 
_cell_measurement_temperature     258(2) 
_cell_measurement_reflns_used     8093 
_cell_measurement_theta_min       2.97 
_cell_measurement_theta_max       28.11 
  
_exptl_crystal_description        block 
_exptl_crystal_colour             yellow 
_exptl_crystal_density_meas       ? 
_exptl_crystal_density_method     ? 
_exptl_crystal_density_diffrn     1.255 
_exptl_crystal_F_000              752 
_exptl_transmission_factor_min    0.6248 
_exptl_transmission_factor_max    0.7457 
_exptl_crystal_size_max           0.250 
_exptl_crystal_size_mid           0.180 
_exptl_crystal_size_min           0.150 
_exptl_absorpt_coefficient_mu     0.184 
_shelx_estimated_absorpt_T_min    0.955 
_shelx_estimated_absorpt_T_max    0.973 
_exptl_absorpt_correction_type    Multi-scan 
_exptl_absorpt_correction_T_min   ? 
_exptl_absorpt_correction_T_max   ? 
_exptl_absorpt_process_details    SADABS 
_exptl_absorpt_special_details    ? 
_diffrn_ambient_temperature       258(2) 
_diffrn_radiation_wavelength      0.71073 
_diffrn_radiation_type            MoK\a 
_diffrn_source                    ? 
_diffrn_measurement_device_type   'Bruker APEX-II CCD' 
_diffrn_measurement_method        '\f and \w scans' 
_diffrn_detector_area_resol_mean  ? 
_diffrn_reflns_number             13854 
_diffrn_reflns_av_unetI/netI      0.0276 
_diffrn_reflns_av_R_equivalents   0.0333 
_diffrn_reflns_limit_h_min        -11 
_diffrn_reflns_limit_h_max        11 
_diffrn_reflns_limit_k_min        -14 
_diffrn_reflns_limit_k_max        15 
_diffrn_reflns_limit_l_min        -18 
_diffrn_reflns_limit_l_max        16 
_diffrn_reflns_theta_min          2.974 
_diffrn_reflns_theta_max          25.042 
_diffrn_reflns_theta_full         25.042 
_diffrn_measured_fraction_theta_max   0.995 
_diffrn_measured_fraction_theta_full  0.995 
_diffrn_reflns_Laue_measured_fraction_max    0.995 
_diffrn_reflns_Laue_measured_fraction_full   0.995 
_diffrn_reflns_point_group_measured_fraction_max   0.995 
_diffrn_reflns_point_group_measured_fraction_full  0.995 
_reflns_number_total              3348 
_reflns_number_gt                 2905 
_reflns_threshold_expression      'I > 2\s(I)' 
_reflns_Friedel_coverage          0.740 
_reflns_Friedel_fraction_max      0.996 
_reflns_Friedel_fraction_full     0.996 
  
_reflns_special_details 
; 
 Reflections were merged by SHELXL according to the crystal 
 class for the calculation of statistics and refinement. 
  
 _reflns_Friedel_fraction is defined as the number of unique 
 Friedel pairs measured divided by the number that would be 
 possible theoretically, ignoring centric projections and 
 systematic absences. 
; 
  
_computing_data_collection        'Bruker APEX2' 
_computing_cell_refinement        'Bruker SAINT' 
_computing_data_reduction         'Bruker SAINT' 
_computing_structure_solution     'SHELXS-97 (Sheldrick 2008)' 
_computing_structure_refinement 'SHELXL-2014/7 (Sheldrick, 2014)' 
_computing_molecular_graphics     'Bruker SHELXTL' 
_computing_publication_material   'Bruker SHELXTL' 
_refine_special_details           ? 
_refine_ls_structure_factor_coef  Fsqd 
_refine_ls_matrix_type            full 
_refine_ls_weighting_scheme       calc 
_refine_ls_weighting_details 
'w=1/[\s^2^(Fo^2^)+(0.0459P)^2^+0.1880P] where P=(Fo^2^+2Fc^2^)/3' 
_atom_sites_solution_primary      ? 
_atom_sites_solution_secondary    ? 
_atom_sites_solution_hydrogens    geom 
_refine_ls_hydrogen_treatment     constr 
_refine_ls_extinction_method      none 
_refine_ls_extinction_coef        . 
_refine_ls_abs_structure_details 
; 
 Flack x determined using 1112 quotients [(I+)-(I-)]/[(I+)+(I-)] 
 (Parsons, Flack and Wagner, Acta Cryst. B69 (2013) 249-259). 
; 
_refine_ls_abs_structure_Flack    0.00(3) 
_chemical_absolute_configuration  ? 
_refine_ls_number_reflns          3348 
_refine_ls_number_parameters      237 
_refine_ls_number_restraints      0 
_refine_ls_R_factor_all           0.0448 
_refine_ls_R_factor_gt            0.0356 
_refine_ls_wR_factor_ref          0.0889 
_refine_ls_wR_factor_gt           0.0832 
_refine_ls_goodness_of_fit_ref    1.063 
_refine_ls_restrained_S_all       1.063 
_refine_ls_shift/su_max           0.001 
_refine_ls_shift/su_mean          0.000 
  
loop_ 
 _atom_site_label 
 _atom_site_type_symbol 
 _atom_site_fract_x 
 _atom_site_fract_y 
 _atom_site_fract_z 
 _atom_site_U_iso_or_equiv 
 _atom_site_adp_type 
 _atom_site_occupancy 
 _atom_site_site_symmetry_order 
 _atom_site_calc_flag 
 _atom_site_refinement_flags_posn 
 _atom_site_refinement_flags_adp 
 _atom_site_refinement_flags_occupancy 
 _atom_site_disorder_assembly 
 _atom_site_disorder_group 
C1 C 0.4136(3) 0.7366(2) 0.73557(18) 0.0483(6) Uani 1 1 d . . . . . 
C2 C 0.5501(3) 0.7585(2) 0.7649(2) 0.0602(8) Uani 1 1 d . . . . . 
C3 C 0.6272(4) 0.6899(3) 0.8264(2) 0.0798(10) Uani 1 1 d . . . . . 
H3A H 0.5686 0.6767 0.8767 0.120 Uiso 1 1 calc R U . . . 
H3B H 0.7141 0.7213 0.8449 0.120 Uiso 1 1 calc R U . . . 
H3C H 0.6483 0.6275 0.7971 0.120 Uiso 1 1 calc R U . . . 
C4 C 0.6104(4) 0.8458(3) 0.7316(2) 0.0763(10) Uani 1 1 d . . . . . 
H4 H 0.7009 0.8641 0.7503 0.092 Uiso 1 1 calc R U . . . 
C5 C 0.5418(4) 0.9065(3) 0.6720(3) 0.0793(10) Uani 1 1 d . . . . . 
H5 H 0.5860 0.9647 0.6515 0.095 Uiso 1 1 calc R U . . . 
C6 C 0.4085(3) 0.8817(2) 0.6426(2) 0.0657(8) Uani 1 1 d . . . . . 
H6 H 0.3628 0.9224 0.6016 0.079 Uiso 1 1 calc R U . . . 
C7 C 0.3414(3) 0.79456(19) 0.67452(18) 0.0478(6) Uani 1 1 d . . . . . 
C8 C 0.2007(3) 0.76237(19) 0.64656(18) 0.0429(6) Uani 1 1 d . . . . . 
C9 C 0.1422(3) 0.67933(19) 0.68322(17) 0.0459(6) Uani 1 1 d . . . . . 
C10 C 0.2173(3) 0.6207(2) 0.74994(19) 0.0508(7) Uani 1 1 d . . . . . 
C11 C 0.1256(3) 0.82256(18) 0.57827(17) 0.0436(6) Uani 1 1 d . . . . . 
C12 C 0.1725(3) 0.8199(2) 0.4922(2) 0.0576(7) Uani 1 1 d . . . . . 
H12 H 0.2494 0.7794 0.4769 0.069 Uiso 1 1 calc R U . . . 
C13 C 0.1056(4) 0.8771(3) 0.4292(2) 0.0657(8) Uani 1 1 d . . . . . 
H13 H 0.1376 0.8754 0.3714 0.079 Uiso 1 1 calc R U . . . 
C14 C -0.0085(4) 0.9369(2) 0.4513(2) 0.0658(9) Uani 1 1 d . . . . . 
H14 H -0.0539 0.9752 0.4085 0.079 Uiso 1 1 calc R U . . . 
C15 C -0.0551(4) 0.9399(2) 0.5359(2) 0.0643(9) Uani 1 1 d . . . . . 
H15 H -0.1323 0.9803 0.5507 0.077 Uiso 1 1 calc R U . . . 
C16 C 0.0113(3) 0.8836(2) 0.59973(19) 0.0548(7) Uani 1 1 d . . . . . 
H16 H -0.0206 0.8865 0.6574 0.066 Uiso 1 1 calc R U . . . 
C17 C -0.0081(3) 0.5144(2) 0.6238(2) 0.0536(7) Uani 1 1 d . . . . . 
C18 C -0.1012(4) 0.4411(3) 0.6525(3) 0.0794(10) Uani 1 1 d . . . . . 
H18 H -0.1726 0.4572 0.6924 0.095 Uiso 1 1 calc R U . . . 
C19 C -0.0876(5) 0.3436(3) 0.6215(3) 0.0901(12) Uani 1 1 d . . . . . 
H19 H -0.1533 0.2953 0.6394 0.108 Uiso 1 1 calc R U . . . 
C20 C 0.0191(5) 0.3155(3) 0.5655(3) 0.0764(10) Uani 1 1 d . . . . . 
C21 C 0.0347(6) 0.2074(3) 0.5349(3) 0.1121(17) Uani 1 1 d . . . . . 
H21A H -0.0458 0.1892 0.4996 0.168 Uiso 1 1 calc R U . . . 
H21B H 0.0398 0.1635 0.5850 0.168 Uiso 1 1 calc R U . . . 
H21C H 0.1200 0.2008 0.5008 0.168 Uiso 1 1 calc R U . . . 
C22 C 0.1098(4) 0.3904(3) 0.5372(3) 0.0879(12) Uani 1 1 d . . . . . 
H22 H 0.1825 0.3745 0.4983 0.106 Uiso 1 1 calc R U . . . 
C23 C 0.0943(4) 0.4893(3) 0.5660(3) 0.0768(10) Uani 1 1 d . . . . . 
H23 H 0.1555 0.5390 0.5451 0.092 Uiso 1 1 calc R U . . . 
O1 O 0.35265(19) 0.65082(14) 0.77031(13) 0.0540(5) Uani 1 1 d . . . . . 
O2 O 0.1725(2) 0.54870(17) 0.78874(16) 0.0708(6) Uani 1 1 d . . . . . 
S1 S -0.03328(7) 0.64092(6) 0.65953(6) 0.0621(2) Uani 1 1 d . . . . . 
  
loop_ 
 _atom_site_aniso_label 
 _atom_site_aniso_U_11 
 _atom_site_aniso_U_22 
 _atom_site_aniso_U_33 
 _atom_site_aniso_U_23 
 _atom_site_aniso_U_13 
 _atom_site_aniso_U_12 
C1 0.0429(13) 0.0480(15) 0.0539(15) -0.0057(13) 0.0014(13) 0.0009(12) 
C2 0.0465(14) 0.0697(19) 0.0645(19) -0.0153(15) -0.0040(14) -0.0045(16) 
C3 0.0547(18) 0.107(3) 0.078(2) -0.004(2) -0.0162(17) 0.0005(19) 
C4 0.0531(17) 0.082(2) 0.094(2) -0.016(2) -0.0106(18) -0.0191(18) 
C5 0.0665(19) 0.065(2) 0.106(3) -0.0007(19) -0.007(2) -0.0236(18) 
C6 0.0616(17) 0.0493(16) 0.086(2) 0.0033(16) -0.0057(17) -0.0091(15) 
C7 0.0438(13) 0.0409(14) 0.0588(17) -0.0064(12) 0.0027(13) -0.0004(12) 
C8 0.0389(12) 0.0397(13) 0.0502(15) -0.0034(11) 0.0050(11) 0.0040(11) 
C9 0.0369(12) 0.0430(14) 0.0578(16) 0.0006(12) 0.0016(12) 0.0016(11) 
C10 0.0418(13) 0.0514(16) 0.0594(17) 0.0038(14) 0.0050(13) 0.0036(13) 
C11 0.0403(13) 0.0370(13) 0.0537(16) -0.0015(11) 0.0026(12) -0.0025(11) 
C12 0.0547(17) 0.0576(17) 0.0604(18) -0.0038(15) 0.0081(15) 0.0039(14) 
C13 0.073(2) 0.076(2) 0.0483(16) 0.0037(15) -0.0007(16) -0.0115(19) 
C14 0.073(2) 0.0586(18) 0.066(2) 0.0080(15) -0.0203(18) -0.0028(17) 
C15 0.067(2) 0.0565(18) 0.070(2) -0.0055(14) -0.0137(17) 0.0166(16) 
C16 0.0572(17) 0.0545(16) 0.0529(16) -0.0025(13) 0.0013(13) 0.0112(14) 
C17 0.0439(15) 0.0541(16) 0.0629(17) 0.0150(13) -0.0080(14) -0.0103(13) 
C18 0.082(2) 0.072(2) 0.084(2) 0.0168(19) 0.015(2) -0.0247(19) 
C19 0.113(3) 0.065(2) 0.092(3) 0.025(2) -0.003(3) -0.040(2) 
C20 0.085(2) 0.0594(19) 0.084(2) 0.0042(18) -0.035(2) -0.0145(19) 
C21 0.136(4) 0.061(2) 0.139(4) -0.009(2) -0.057(3) -0.008(3) 
C22 0.070(2) 0.078(3) 0.115(3) -0.021(2) 0.007(2) -0.016(2) 
C23 0.063(2) 0.063(2) 0.105(3) -0.0051(19) 0.014(2) -0.0220(17) 
O1 0.0423(9) 0.0546(11) 0.0650(12) 0.0068(9) -0.0047(9) 0.0029(9) 
O2 0.0580(12) 0.0668(14) 0.0876(16) 0.0337(12) -0.0017(12) -0.0054(11) 
S1 0.0353(3) 0.0585(4) 0.0926(6) 0.0098(4) -0.0014(4) -0.0023(3) 
  
_geom_special_details 
; 
 All esds (except the esd in the dihedral angle between two l.s. planes) 
 are estimated using the full covariance matrix.  The cell esds are taken 
 into account individually in the estimation of esds in distances, angles 
 and torsion angles; correlations between esds in cell parameters are only 
 used when they are defined by crystal symmetry.  An approximate (isotropic) 
 treatment of cell esds is used for estimating esds involving l.s. planes. 
; 
  
loop_ 
 _geom_bond_atom_site_label_1 
 _geom_bond_atom_site_label_2 
 _geom_bond_distance 
 _geom_bond_site_symmetry_2 
 _geom_bond_publ_flag 
C1 O1 1.378(3) . ? 
C1 C7 1.384(4) . ? 
C1 C2 1.391(4) . ? 
C2 C4 1.384(5) . ? 
C2 C3 1.493(5) . ? 
C3 H3A 0.9600 . ? 
C3 H3B 0.9600 . ? 
C3 H3C 0.9600 . ? 
C4 C5 1.373(5) . ? 
C4 H4 0.9300 . ? 
C5 C6 1.372(5) . ? 
C5 H5 0.9300 . ? 
C6 C7 1.402(4) . ? 
C6 H6 0.9300 . ? 
C7 C8 1.454(4) . ? 
C8 C9 1.350(4) . ? 
C8 C11 1.489(4) . ? 
C9 C10 1.461(4) . ? 
C9 S1 1.765(3) . ? 
C10 O2 1.198(3) . ? 
C10 O1 1.369(3) . ? 
C11 C16 1.384(4) . ? 
C11 C12 1.385(4) . ? 
C12 C13 1.375(4) . ? 
C12 H12 0.9300 . ? 
C13 C14 1.375(5) . ? 
C13 H13 0.9300 . ? 
C14 C15 1.363(5) . ? 
C14 H14 0.9300 . ? 
C15 C16 1.375(4) . ? 
C15 H15 0.9300 . ? 
C16 H16 0.9300 . ? 
C17 C23 1.347(4) . ? 
C17 C18 1.379(4) . ? 
C17 S1 1.778(3) . ? 
C18 C19 1.380(5) . ? 
C18 H18 0.9300 . ? 
C19 C20 1.370(6) . ? 
C19 H19 0.9300 . ? 
C20 C22 1.378(5) . ? 
C20 C21 1.512(5) . ? 
C21 H21A 0.9600 . ? 
C21 H21B 0.9600 . ? 
C21 H21C 0.9600 . ? 
C22 C23 1.389(5) . ? 
C22 H22 0.9300 . ? 
C23 H23 0.9300 . ? 
  
loop_ 
 _geom_angle_atom_site_label_1 
 _geom_angle_atom_site_label_2 
 _geom_angle_atom_site_label_3 
 _geom_angle 
 _geom_angle_site_symmetry_1 
 _geom_angle_site_symmetry_3 
 _geom_angle_publ_flag 
O1 C1 C7 120.7(2) . . ? 
O1 C1 C2 115.6(3) . . ? 
C7 C1 C2 123.6(3) . . ? 
C4 C2 C1 115.8(3) . . ? 
C4 C2 C3 122.7(3) . . ? 
C1 C2 C3 121.5(3) . . ? 
C2 C3 H3A 109.5 . . ? 
C2 C3 H3B 109.5 . . ? 
H3A C3 H3B 109.5 . . ? 
C2 C3 H3C 109.5 . . ? 
H3A C3 H3C 109.5 . . ? 
H3B C3 H3C 109.5 . . ? 
C5 C4 C2 122.6(3) . . ? 
C5 C4 H4 118.7 . . ? 
C2 C4 H4 118.7 . . ? 
C6 C5 C4 120.4(3) . . ? 
C6 C5 H5 119.8 . . ? 
C4 C5 H5 119.8 . . ? 
C5 C6 C7 119.6(3) . . ? 
C5 C6 H6 120.2 . . ? 
C7 C6 H6 120.2 . . ? 
C1 C7 C6 117.9(3) . . ? 
C1 C7 C8 118.8(2) . . ? 
C6 C7 C8 123.3(3) . . ? 
C9 C8 C7 119.2(2) . . ? 
C9 C8 C11 122.1(2) . . ? 
C7 C8 C11 118.7(2) . . ? 
C8 C9 C10 121.6(2) . . ? 
C8 C9 S1 122.1(2) . . ? 
C10 C9 S1 116.20(19) . . ? 
O2 C10 O1 116.5(3) . . ? 
O2 C10 C9 126.6(3) . . ? 
O1 C10 C9 116.9(2) . . ? 
C16 C11 C12 119.1(3) . . ? 
C16 C11 C8 121.1(2) . . ? 
C12 C11 C8 119.8(2) . . ? 
C13 C12 C11 120.1(3) . . ? 
C13 C12 H12 119.9 . . ? 
C11 C12 H12 119.9 . . ? 
C12 C13 C14 120.2(3) . . ? 
C12 C13 H13 119.9 . . ? 
C14 C13 H13 119.9 . . ? 
C15 C14 C13 119.9(3) . . ? 
C15 C14 H14 120.0 . . ? 
C13 C14 H14 120.0 . . ? 
C14 C15 C16 120.5(3) . . ? 
C14 C15 H15 119.7 . . ? 
C16 C15 H15 119.7 . . ? 
C15 C16 C11 120.2(3) . . ? 
C15 C16 H16 119.9 . . ? 
C11 C16 H16 119.9 . . ? 
C23 C17 C18 119.3(3) . . ? 
C23 C17 S1 121.9(2) . . ? 
C18 C17 S1 118.8(3) . . ? 
C17 C18 C19 119.4(4) . . ? 
C17 C18 H18 120.3 . . ? 
C19 C18 H18 120.3 . . ? 
C20 C19 C18 122.4(3) . . ? 
C20 C19 H19 118.8 . . ? 
C18 C19 H19 118.8 . . ? 
C19 C20 C22 116.9(3) . . ? 
C19 C20 C21 121.4(4) . . ? 
C22 C20 C21 121.7(4) . . ? 
C20 C21 H21A 109.5 . . ? 
C20 C21 H21B 109.5 . . ? 
H21A C21 H21B 109.5 . . ? 
C20 C21 H21C 109.5 . . ? 
H21A C21 H21C 109.5 . . ? 
H21B C21 H21C 109.5 . . ? 
C20 C22 C23 121.0(4) . . ? 
C20 C22 H22 119.5 . . ? 
C23 C22 H22 119.5 . . ? 
C17 C23 C22 120.9(3) . . ? 
C17 C23 H23 119.5 . . ? 
C22 C23 H23 119.5 . . ? 
C10 O1 C1 122.6(2) . . ? 
C9 S1 C17 102.09(12) . . ? 
  
loop_ 
 _geom_torsion_atom_site_label_1 
 _geom_torsion_atom_site_label_2 
 _geom_torsion_atom_site_label_3 
 _geom_torsion_atom_site_label_4 
 _geom_torsion 
 _geom_torsion_site_symmetry_1 
 _geom_torsion_site_symmetry_2 
 _geom_torsion_site_symmetry_3 
 _geom_torsion_site_symmetry_4 
 _geom_torsion_publ_flag 
O1 C1 C2 C4 -178.7(3) . . . . ? 
C7 C1 C2 C4 2.4(4) . . . . ? 
O1 C1 C2 C3 3.1(4) . . . . ? 
C7 C1 C2 C3 -175.9(3) . . . . ? 
C1 C2 C4 C5 -1.2(5) . . . . ? 
C3 C2 C4 C5 177.0(3) . . . . ? 
C2 C4 C5 C6 -0.4(6) . . . . ? 
C4 C5 C6 C7 0.9(5) . . . . ? 
O1 C1 C7 C6 179.2(2) . . . . ? 
C2 C1 C7 C6 -1.9(4) . . . . ? 
O1 C1 C7 C8 -0.9(4) . . . . ? 
C2 C1 C7 C8 178.0(3) . . . . ? 
C5 C6 C7 C1 0.2(5) . . . . ? 
C5 C6 C7 C8 -179.7(3) . . . . ? 
C1 C7 C8 C9 2.5(4) . . . . ? 
C6 C7 C8 C9 -177.6(3) . . . . ? 
C1 C7 C8 C11 -177.6(2) . . . . ? 
C6 C7 C8 C11 2.2(4) . . . . ? 
C7 C8 C9 C10 -0.4(4) . . . . ? 
C11 C8 C9 C10 179.8(2) . . . . ? 
C7 C8 C9 S1 174.84(19) . . . . ? 
C11 C8 C9 S1 -5.0(3) . . . . ? 
C8 C9 C10 O2 176.8(3) . . . . ? 
S1 C9 C10 O2 1.3(4) . . . . ? 
C8 C9 C10 O1 -3.3(4) . . . . ? 
S1 C9 C10 O1 -178.75(19) . . . . ? 
C9 C8 C11 C16 72.9(3) . . . . ? 
C7 C8 C11 C16 -107.0(3) . . . . ? 
C9 C8 C11 C12 -108.8(3) . . . . ? 
C7 C8 C11 C12 71.3(3) . . . . ? 
C16 C11 C12 C13 -0.2(4) . . . . ? 
C8 C11 C12 C13 -178.5(3) . . . . ? 
C11 C12 C13 C14 -0.2(5) . . . . ? 
C12 C13 C14 C15 0.3(5) . . . . ? 
C13 C14 C15 C16 0.1(5) . . . . ? 
C14 C15 C16 C11 -0.5(5) . . . . ? 
C12 C11 C16 C15 0.6(4) . . . . ? 
C8 C11 C16 C15 178.9(3) . . . . ? 
C23 C17 C18 C19 0.0(5) . . . . ? 
S1 C17 C18 C19 176.5(3) . . . . ? 
C17 C18 C19 C20 2.7(6) . . . . ? 
C18 C19 C20 C22 -3.2(6) . . . . ? 
C18 C19 C20 C21 177.9(4) . . . . ? 
C19 C20 C22 C23 1.2(6) . . . . ? 
C21 C20 C22 C23 -179.9(4) . . . . ? 
C18 C17 C23 C22 -2.0(5) . . . . ? 
S1 C17 C23 C22 -178.3(3) . . . . ? 
C20 C22 C23 C17 1.4(6) . . . . ? 
O2 C10 O1 C1 -175.1(2) . . . . ? 
C9 C10 O1 C1 5.0(4) . . . . ? 
C7 C1 O1 C10 -3.0(4) . . . . ? 
C2 C1 O1 C10 178.1(2) . . . . ? 
C8 C9 S1 C17 125.0(2) . . . . ? 
C10 C9 S1 C17 -59.6(2) . . . . ? 
C23 C17 S1 C9 -46.2(3) . . . . ? 
C18 C17 S1 C9 137.5(3) . . . . ? 
  
_refine_diff_density_max    0.110 
_refine_diff_density_min   -0.159 
_refine_diff_density_rms    0.035 
  
_shelx_res_file 
; 
  
    160704c.res created by SHELXL-2014/7 
  
  
TITL 160704c in P2(1)2(1)2(1) 
CELL 0.71073   9.40700  13.24050  15.23510  90.0000  90.0000  90.0000 
ZERR   4.00   0.00080   0.00110   0.00140   0.0000   0.0000   0.0000 
LATT -1 
SYMM 0.5-X, -Y, 0.5+Z 
SYMM -X, 0.5+Y, 0.5-Z 
SYMM 0.5+X, 0.5-Y, -Z 
SFAC C H O S 
UNIT 92 72 8 4 
TEMP -15.130 
OMIT -3 50.1 
L.S. 20 
ACTA 
CONF 
SIZE 0.25 0.18 0.15 
BOND $H 
FMAP 2 
PLAN 20 
TEMP -15.130 
WGHT    0.045900    0.188000 
FVAR       0.33148 
C1    1    0.413555    0.736640    0.735574    11.00000    0.04293    0.04804 = 
         0.05386   -0.00570    0.00141    0.00085 
C2    1    0.550135    0.758543    0.764931    11.00000    0.04654    0.06970 = 
         0.06447   -0.01530   -0.00404   -0.00454 
C3    1    0.627176    0.689894    0.826411    11.00000    0.05471    0.10663 = 
         0.07796   -0.00351   -0.01624    0.00053 
AFIX 137 
H3A   2    0.568648    0.676728    0.876747    11.00000   -1.50000 
H3B   2    0.714125    0.721348    0.844877    11.00000   -1.50000 
H3C   2    0.648295    0.627461    0.797145    11.00000   -1.50000 
AFIX   0 
C4    1    0.610398    0.845830    0.731598    11.00000    0.05311    0.08215 = 
         0.09351   -0.01592   -0.01058   -0.01911 
AFIX  43 
H4    2    0.700930    0.864119    0.750277    11.00000   -1.20000 
AFIX   0 
C5    1    0.541800    0.906498    0.672036    11.00000    0.06648    0.06524 = 
         0.10611   -0.00074   -0.00734   -0.02361 
AFIX  43 
H5    2    0.585965    0.964750    0.651549    11.00000   -1.20000 
AFIX   0 
C6    1    0.408468    0.881689    0.642558    11.00000    0.06158    0.04932 = 
         0.08620    0.00328   -0.00567   -0.00912 
AFIX  43 
H6    2    0.362833    0.922444    0.601598    11.00000   -1.20000 
AFIX   0 
C7    1    0.341382    0.794557    0.674522    11.00000    0.04381    0.04088 = 
         0.05883   -0.00641    0.00272   -0.00042 
C8    1    0.200671    0.762372    0.646557    11.00000    0.03892    0.03969 = 
         0.05017   -0.00337    0.00502    0.00397 
C9    1    0.142236    0.679330    0.683222    11.00000    0.03688    0.04302 = 
         0.05776    0.00061    0.00165    0.00161 
C10   1    0.217336    0.620716    0.749945    11.00000    0.04176    0.05137 = 
         0.05939    0.00378    0.00496    0.00362 
C11   1    0.125575    0.822558    0.578268    11.00000    0.04031    0.03697 = 
         0.05365   -0.00147    0.00258   -0.00248 
C12   1    0.172486    0.819938    0.492156    11.00000    0.05472    0.05760 = 
         0.06042   -0.00376    0.00811    0.00395 
AFIX  43 
H12   2    0.249382    0.779433    0.476898    11.00000   -1.20000 
AFIX   0 
C13   1    0.105588    0.877106    0.429182    11.00000    0.07328    0.07569 = 
         0.04826    0.00372   -0.00074   -0.01155 
AFIX  43 
H13   2    0.137597    0.875361    0.371447    11.00000   -1.20000 
AFIX   0 
C14   1   -0.008527    0.936882    0.451259    11.00000    0.07267    0.05858 = 
         0.06608    0.00801   -0.02027   -0.00283 
AFIX  43 
H14   2   -0.053879    0.975218    0.408455    11.00000   -1.20000 
AFIX   0 
C15   1   -0.055053    0.939861    0.535935    11.00000    0.06662    0.05645 = 
         0.06997   -0.00547   -0.01368    0.01660 
AFIX  43 
H15   2   -0.132291    0.980289    0.550679    11.00000   -1.20000 
AFIX   0 
C16   1    0.011324    0.883557    0.599728    11.00000    0.05719    0.05449 = 
         0.05286   -0.00253    0.00135    0.01120 
AFIX  43 
H16   2   -0.020644    0.886478    0.657436    11.00000   -1.20000 
AFIX   0 
C17   1   -0.008089    0.514382    0.623798    11.00000    0.04386    0.05413 = 
         0.06295    0.01497   -0.00797   -0.01031 
C18   1   -0.101244    0.441093    0.652521    11.00000    0.08225    0.07156 = 
         0.08435    0.01676    0.01469   -0.02469 
AFIX  43 
H18   2   -0.172584    0.457194    0.692398    11.00000   -1.20000 
AFIX   0 
C19   1   -0.087638    0.343609    0.621544    11.00000    0.11323    0.06545 = 
         0.09174    0.02454   -0.00335   -0.03986 
AFIX  43 
H19   2   -0.153334    0.295286    0.639351    11.00000   -1.20000 
AFIX   0 
C20   1    0.019145    0.315476    0.565518    11.00000    0.08518    0.05943 = 
         0.08448    0.00423   -0.03509   -0.01446 
C21   1    0.034701    0.207393    0.534922    11.00000    0.13589    0.06119 = 
         0.13929   -0.00935   -0.05741   -0.00774 
AFIX 137 
H21A  2   -0.045838    0.189249    0.499582    11.00000   -1.50000 
H21B  2    0.039818    0.163474    0.584959    11.00000   -1.50000 
H21C  2    0.119999    0.200841    0.500801    11.00000   -1.50000 
AFIX   0 
C22   1    0.109802    0.390427    0.537240    11.00000    0.07029    0.07821 = 
         0.11526   -0.02085    0.00671   -0.01565 
AFIX  43 
H22   2    0.182534    0.374533    0.498269    11.00000   -1.20000 
AFIX   0 
C23   1    0.094305    0.489326    0.566000    11.00000    0.06341    0.06259 = 
         0.10454   -0.00515    0.01416   -0.02198 
AFIX  43 
H23   2    0.155494    0.538952    0.545055    11.00000   -1.20000 
AFIX   0 
O1    3    0.352652    0.650820    0.770310    11.00000    0.04234    0.05461 = 
         0.06504    0.00681   -0.00475    0.00292 
O2    3    0.172506    0.548704    0.788735    11.00000    0.05801    0.06683 = 
         0.08763    0.03365   -0.00167   -0.00537 
S1    4   -0.033285    0.640919    0.659532    11.00000    0.03527    0.05853 = 
         0.09263    0.00978   -0.00136   -0.00226 
HKLF 4 
  
REM  160704c in P2(1)2(1)2(1) 
REM R1 =  0.0356 for    2905 Fo > 4sig(Fo)  and  0.0448 for all    3348 data 
REM    237 parameters refined using      0 restraints 
  
END 
  
WGHT      0.0453      0.1935 
  
REM Highest difference peak  0.110,  deepest hole -0.159,  1-sigma level  0.035 
Q1    1   0.5304  1.0746  0.6567  11.00000  0.05    0.11 
Q2    1   0.7272  0.6751  0.8146  11.00000  0.05    0.11 
Q3    1  -0.0262  0.4069  0.6617  11.00000  0.05    0.11 
Q4    1   0.5478  0.9975  0.6639  11.00000  0.05    0.11 
Q5    1   0.4717  0.7649  0.5007  11.00000  0.05    0.11 
Q6    1   0.1413  0.1784  0.5477  11.00000  0.05    0.10 
Q7    1   0.8486  0.7826  0.8002  11.00000  0.05    0.10 
Q8    1   0.7054  0.9016  0.6221  11.00000  0.05    0.10 
Q9    1   0.6534  0.7338  0.9059  11.00000  0.05    0.10 
Q10   1   0.0679  0.4944  0.6359  11.00000  0.05    0.10 
Q11   1   0.0135  1.0598  0.4401  11.00000  0.05    0.10 
Q12   1   0.0059  0.3311  0.6267  11.00000  0.05    0.09 
Q13   1   0.1261  0.6659  0.5603  11.00000  0.05    0.09 
Q14   1   0.8607  0.6956  0.7856  11.00000  0.05    0.09 
Q15   1  -0.0035  0.7376  0.5530  11.00000  0.05    0.09 
Q16   1   0.3751  0.7970  0.4752  11.00000  0.05    0.09 
Q17   1  -0.0716  0.1270  0.5726  11.00000  0.05    0.09 
Q18   1   0.3559  0.7891  0.7335  11.00000  0.05    0.09 
Q19   1   0.0415  0.6830  0.7914  11.00000  0.05    0.09 
Q20   1   0.7571  0.7574  0.6790  11.00000  0.05    0.09 
; 
_shelx_res_checksum   85894 
  
_shelx_hkl_file 
; 
   3   0   0   -0.01    0.24 
   3   0   0   -0.12    0.12 
  -3   0   0   -0.01    0.14 
   3   0   0   -0.09    0.09 
  -3   0   0   -0.34    0.20 
  -3   0   0    0.17    0.19 
   4   0   0  206.64    6.11 
   4   0   0  201.26    6.10 
  -4   0   0  203.11    6.12 
  -4   0   0  202.61    6.19 
  -5   0   0    0.19    0.30 
   5   0   0   -0.45    0.20 
  -5   0   0    0.13    0.28 
   5   0   0   -0.08    0.16 
  -6   0   0   78.08    2.97 
   6   0   0   77.68    2.54 
  -6   0   0   79.54    3.06 
   6   0   0   72.49    2.51 
   7   0   0   -0.36    0.21 
   7   0   0   -0.11    0.27 
  -7   0   0    0.02    0.42 
  -7   0   0   -0.21    0.39 
  -8   0   0    9.35    0.93 
  -8   0   0   10.48    0.85 
   8   0   0   10.33    0.72 
   9   0   0    0.18    0.30 
  -9   0   0   -0.24    0.57 
  -9   0   0    0.07    0.43 
  10   0   0   -0.31    0.42 
 -10   0   0    0.55    0.56 
 -10   0   0    1.03    0.54 
  10   0   0    0.11    0.42 
 -11   0   0   -0.32    0.59 
  11   0   0   -0.91    0.50 
 -11   0   0    1.66    0.63 
  12   0   0    6.77    0.98 
   2  -1   0  236.79    6.73 
  -2  -1   0  241.57    6.67 
  -2   1   0  215.20    6.72 
  -2  -1   0  214.55    6.71 
  -2  -1   0  223.94    6.68 
   2   1   0  201.10    6.69 
  -2   1   0  247.08    6.69 
   2   1   0  236.59    6.73 
   2   1   0  234.69    6.68 
   2   1   0  226.36    6.66 
  -2  -1   0  211.56    6.68 
   2  -1   0  224.04    6.68 
  -3  -1   0   23.56    0.92 
  -3   1   0   22.25    0.94 
   3  -1   0   25.07    0.96 
  -3   1   0   24.47    0.86 
   3   1   0   24.74    0.86 
  -3  -1   0   24.30    0.83 
  -3  -1   0   23.47    0.85 
   3   1   0   23.46    0.83 
   3   1   0   21.82    0.85 
   3   1   0   25.73    0.96 
   4   1   0  208.97    6.44 
   4  -1   0  211.46    6.42 
   4  -1   0  206.45    6.41 
  -4  -1   0  213.39    6.43 
  -4  -1   0  214.89    6.50 
   4   1   0  224.99    6.41 
  -4   1   0  211.18    6.50 
  -4   1   0  215.38    6.44 
   4   1   0  219.27    6.41 
   5  -1   0   20.34    0.85 
  -5  -1   0   23.90    0.93 
  -5   1   0   23.71    1.06 
  -5   1   0   22.41    0.93 
   5   1   0   20.38    0.91 
   5   1   0   22.66    0.90 
   5  -1   0   21.76    0.92 
  -5  -1   0   22.67    1.03 
  -6   1   0   28.18    1.51 
  -6  -1   0   28.30    1.15 
   6   1   0   28.78    1.17 
   6  -1   0   27.22    1.16 
  -6   1   0   27.02    1.15 
   6   1   0   28.06    1.12 
  -6  -1   0   28.71    1.34 
   6  -1   0   30.72    1.18 
   7  -1   0    0.61    0.35 
  -7  -1   0    0.58    0.44 
   7   1   0    0.87    0.37 
  -7  -1   0    1.11    0.44 
   7   1   0    0.50    0.30 
  -7   1   0    1.25    0.46 
   7  -1   0    0.72    0.32 
  -7   1   0    0.35    0.45 
   8   1   0   36.10    1.49 
  -8   1   0   37.41    1.58 
  -8  -1   0   37.95    1.54 
  -8   1   0   34.99    1.71 
   8  -1   0   39.49    1.53 
   8   1   0   39.58    1.58 
   8  -1   0   36.69    1.51 
  -8  -1   0   36.12    1.69 
   9   1   0    9.34    0.75 
  -9   1   0    8.95    0.87 
   9  -1   0    7.58    0.73 
  -9  -1   0    9.08    0.93 
  -9   1   0    8.48    0.98 
   9   1   0    8.77    0.79 
   9  -1   0    8.92    0.78 
  10  -1   0    0.22    0.37 
 -10   1   0    0.48    0.52 
  10   1   0    0.20    0.39 
 -10  -1   0   -0.48    0.54 
  10   1   0    0.11    0.39 
 -10  -1   0    0.53    0.51 
  10  -1   0    0.70    0.45 
 -10   1   0   -0.41    0.57 
 -11   1   0    6.54    0.97 
  11   1   0    5.53    1.06 
 -11   1   0    9.06    1.27 
  11  -1   0    5.80    0.73 
 -11  -1   0    7.04    0.96 
 -12   1   0    3.05    0.87 
  12  -1   0    2.24    0.65 
  12  -1   0    1.33    0.61 
  12   1   0    1.56    0.68 
  12   1   0    0.72    0.58 
 -12   1   0    0.66    0.91 
   1  -2   0   75.30    2.21 
  -1  -2   0   66.55    2.25 
  -1  -2   0   76.25    2.19 
   1   2   0   73.17    2.27 
  -1   2   0   73.54    2.21 
   1   2   0   77.63    2.26 
  -1   2   0   71.22    2.27 
   1  -2   0   75.98    2.28 
  -1   2   0   78.79    2.24 
   2  -2   0   51.85    1.65 
  -2  -2   0   48.85    1.59 
   2   2   0   50.45    1.55 
  -2   2   0   52.39    1.59 
   2  -2   0   49.22    1.59 
   2   2   0   49.26    1.64 
   2   2   0   51.44    1.60 
  -2  -2   0   51.91    1.55 
   3   2   0  123.08    3.67 
  -3  -2   0  120.61    3.70 
  -3  -2   0  126.60    3.64 
   3  -2   0  121.89    3.68 
   3  -2   0  120.77    3.75 
   3   2   0  119.17    3.73 
  -3  -2   0  117.51    3.66 
  -3   2   0  119.03    3.75 
  -3   2   0  124.45    3.69 
   3   2   0  118.47    3.64 
   3   2   0  119.31    3.72 
   4   2   0   53.64    1.73 
   4   2   0   49.20    1.80 
   4   2   0   55.77    1.80 
  -4  -2   0   57.20    1.76 
  -4   2   0   53.58    1.88 
  -4  -2   0   52.57    1.85 
   4  -2   0   53.43    1.77 
  -4  -2   0   53.71    1.76 
   5  -2   0   99.46    3.20 
  -5  -2   0   99.42    3.18 
  -5   2   0   97.55    3.31 
  -5  -2   0  100.60    3.30 
   5  -2   0  100.07    3.12 
   5   2   0   99.44    3.24 
   5   2   0  108.70    3.28 
   5   2   0  102.25    3.16 
   6   2   0    0.39    0.26 
  -6  -2   0    0.46    0.36 
   6   2   0    0.82    0.26 
   6  -2   0    0.45    0.19 
  -6   2   0    0.60    0.36 
  -6   2   0    0.42    0.44 
  -6  -2   0    0.28    0.37 
   6  -2   0    0.23    0.31 
  -7   2   0   21.13    1.05 
  -7  -2   0   20.94    1.19 
   7   2   0   19.89    1.10 
  -7  -2   0   21.28    1.02 
  -7   2   0   20.56    1.25 
   7  -2   0   21.06    1.01 
   7  -2   0   22.23    0.93 
   8  -2   0    0.63    0.27 
  -8   2   0    0.19    0.48 
  -8  -2   0    0.30    0.46 
   8   2   0    0.89    0.34 
   8  -2   0    0.75    0.34 
  -8  -2   0   -0.04    0.41 
   8   2   0    0.75    0.31 
  -9   2   0   11.36    1.05 
  -9  -2   0   12.49    1.08 
   9   2   0   10.77    0.91 
  -9   2   0   11.64    0.93 
   9  -2   0   11.71    1.04 
  -9  -2   0   10.90    1.02 
   9  -2   0   11.49    0.81 
 -10   2   0    7.38    1.05 
 -10   2   0    5.36    0.89 
  10  -2   0    5.79    0.83 
  10   2   0    6.02    0.75 
  10  -2   0    6.63    0.80 
  11  -2   0    8.23    0.96 
  11   2   0    9.44    1.00 
 -11   2   0   10.02    1.33 
  11  -2   0    6.23    0.92 
 -11  -2   0    8.28    0.96 
  11   2   0    8.02    1.18 
  12   2   0    2.13    0.72 
 -12   2   0    1.54    0.88 
 -12  -2   0    3.03    0.82 
  12  -2   0    3.00    0.77 
  12   2   0    2.81    0.66 
  12  -2   0    2.23    0.73 
 -12   2   0    4.20    1.02 
   0  -3   0   -0.15    0.05 
   0   3   0   -0.25    0.09 
   0   3   0   -0.17    0.05 
   0  -3   0   -0.17    0.10 
   0   3   0   -0.26    0.15 
   1  -3   0  272.85    7.96 
  -1  -3   0  261.22    7.93 
   1  -3   0  267.42    7.88 
   1   3   0  273.87    7.96 
  -1  -3   0  273.17    7.94 
  -1   3   0  253.76    7.95 
  -1   3   0  284.23    7.89 
   1   3   0  269.99    7.94 
   1  -3   0  269.44    7.87 
  -1   3   0  256.73    7.87 
   2   3   0   -0.10    0.09 
   2  -3   0   -0.28    0.12 
  -2  -3   0   -0.16    0.12 
   2   3   0    0.12    0.20 
  -2   3   0    0.26    0.21 
  -2   3   0   -0.20    0.14 
   2  -3   0    0.29    0.20 
   2   3   0   -0.25    0.11 
  -2  -3   0   -0.24    0.09 
  -2  -3   0   -0.12    0.17 
  -3  -3   0  259.77    7.96 
  -3  -3   0  286.75    7.91 
   3   3   0  252.94    8.03 
   3  -3   0  266.26    7.97 
   3   3   0  274.40    7.91 
  -3   3   0  259.35    8.04 
   3   3   0  275.94    7.97 
   4   3   0   22.06    0.87 
   4   3   0   22.19    0.93 
  -4  -3   0   21.71    0.82 
  -4  -3   0   21.59    0.86 
  -4   3   0   21.98    1.02 
   4  -3   0   21.14    0.87 
   4   3   0   21.80    0.81 
   5  -3   0   37.29    1.32 
  -5  -3   0   40.81    1.48 
   5  -3   0   40.20    1.45 
   5   3   0   40.50    1.52 
  -5   3   0   40.53    1.60 
   5   3   0   41.92    1.39 
  -6  -3   0    7.91    0.60 
   6  -3   0    8.67    0.48 
   6   3   0    8.43    0.69 
  -6   3   0    9.26    0.98 
   6   3   0    8.45    0.57 
  -7   3   0   40.58    1.82 
   7   3   0   42.40    1.69 
   7  -3   0   39.45    1.57 
  -7   3   0   39.67    1.65 
  -7  -3   0   40.69    1.57 
   7  -3   0   41.63    1.47 
   7   3   0   43.09    1.56 
  -8   3   0   10.33    1.08 
  -8  -3   0   10.39    0.80 
  -8   3   0    9.92    0.89 
   8  -3   0   10.76    0.70 
   8   3   0    9.11    0.71 
   8   3   0   11.28    0.85 
  -9  -3   0    2.47    0.67 
  -9   3   0    2.04    0.59 
   9   3   0    1.51    0.41 
   9  -3   0    1.43    0.39 
   9   3   0    2.16    0.47 
  -9   3   0    1.98    0.60 
  10   3   0    6.18    1.06 
 -10   3   0    5.30    0.99 
 -10  -3   0    4.70    0.76 
  10  -3   0    3.50    0.52 
  10   3   0    4.99    0.71 
 -10   3   0    4.95    0.87 
 -11  -3   0    5.00    0.89 
 -11   3   0    7.01    1.24 
  11  -3   0    4.43    0.84 
  11  -3   0    4.18    0.72 
  11   3   0    2.50    0.91 
  12   3   0    0.09    0.57 
 -12   3   0    0.84    0.98 
  12   3   0    0.37    0.64 
   0  -4   0  657.48   18.96 
   0   4   0  631.52   18.95 
   0   4   0  651.58   19.00 
  -1  -4   0   35.40    1.22 
  -1   4   0   36.57    1.17 
   1  -4   0   35.90    1.27 
  -1   4   0   38.00    1.16 
   1  -4   0   37.62    1.17 
   1   4   0   36.89    1.25 
   1  -4   0   35.26    1.15 
  -1  -4   0   34.88    1.24 
   1   4   0   37.26    1.25 
  -1   4   0   36.59    1.27 
   2   4   0  116.92    3.59 
  -2   4   0  111.76    3.58 
   2  -4   0  115.29    3.43 
   2  -4   0  121.97    3.68 
  -2  -4   0  116.89    3.40 
   2   4   0  115.11    3.40 
   2  -4   0  113.06    3.48 
   2   4   0  117.66    3.54 
  -2   4   0  117.76    3.49 
  -2  -4   0  106.92    3.55 
  -2  -4   0  112.69    3.53 
   3   4   0  226.06    7.05 
   3  -4   0  228.72    6.96 
   3   4   0  234.15    6.97 
   3   4   0  234.88    6.87 
   3  -4   0  234.83    6.87 
  -3   4   0  227.21    7.05 
  -3  -4   0  248.94    6.88 
  -3  -4   0  227.57    6.99 
   4   4   0    4.74    0.33 
  -4   4   0    4.53    0.60 
   4   4   0    4.91    0.46 
  -4  -4   0    5.12    0.37 
   4   4   0    4.44    0.47 
   4  -4   0    4.46    0.38 
  -4  -4   0    4.35    0.41 
   5   4   0    6.26    0.55 
   5  -4   0    5.85    0.49 
  -5  -4   0    5.58    0.49 
   5   4   0    6.32    0.42 
  -5   4   0    7.55    1.09 
  -6  -4   0    0.57    0.37 
   6  -4   0    0.59    0.30 
   6   4   0    0.79    0.26 
   6   4   0    0.03    0.47 
  -6   4   0    0.86    0.56 
   7  -4   0    0.61    0.21 
  -7  -4   0    1.02    0.43 
   7   4   0    0.08    0.29 
   7   4   0   -0.04    0.32 
  -7   4   0    0.64    0.51 
   7  -4   0    0.26    0.32 
   8  -4   0   14.13    0.74 
  -8  -4   0   14.04    0.88 
  -8   4   0   11.27    1.14 
   8   4   0   14.10    0.98 
   8   4   0   13.32    0.83 
  -8   4   0   13.70    0.96 
  -9   4   0   -0.29    0.48 
   9   4   0    0.24    0.36 
  -9   4   0    0.45    0.56 
   9  -4   0   -0.07    0.30 
  10   4   0    2.91    0.51 
 -10  -4   0    3.29    0.64 
  10  -4   0    2.97    0.82 
  10   4   0    1.76    0.55 
  10  -4   0    3.33    0.60 
 -10   4   0    2.45    0.70 
  11   4   0    1.09    0.66 
 -11   4   0    2.59    0.77 
  11   4   0    3.34    0.67 
 -11   4   0    2.36    0.81 
  11  -4   0    2.01    0.59 
  11  -4   0    1.31    0.49 
 -11  -4   0    3.25    0.71 
 -12   4   0    7.88    1.96 
 -12   4   0    6.66    1.17 
  12   4   0    8.90    1.11 
  12  -4   0    8.26    1.14 
   0   5   0   -0.22    0.28 
   0   5   0   -0.06    0.13 
   0  -5   0   -0.01    0.07 
   0  -5   0    0.12    0.14 
   0   5   0    0.06    0.07 
   1   5   0  101.46    3.08 
  -1  -5   0   96.11    3.07 
  -1   5   0   96.20    2.98 
   1   5   0   98.08    3.06 
  -1   5   0  102.55    2.95 
   1  -5   0  102.39    2.98 
  -1  -5   0   91.67    3.03 
  -1   5   0   93.96    3.08 
   1  -5   0   97.31    2.94 
   2  -5   0    0.22    0.13 
   2   5   0    0.20    0.18 
  -2   5   0    0.09    0.17 
  -2  -5   0    0.17    0.23 
  -2   5   0    0.12    0.21 
  -2   5   0    0.31    0.11 
   2   5   0   -0.08    0.26 
   2  -5   0    0.25    0.14 
   3   5   0   53.62    1.61 
  -3  -5   0   54.18    1.61 
   3   5   0   52.05    1.85 
  -3   5   0   51.66    1.85 
   3  -5   0   50.94    1.72 
   3  -5   0   53.71    1.64 
  -3  -5   0   50.32    1.76 
   4  -5   0    4.53    0.42 
  -4  -5   0    5.10    0.36 
   4  -5   0    4.90    0.35 
  -4   5   0    5.16    0.63 
   4   5   0    5.15    0.54 
  -4  -5   0    4.76    0.44 
   4   5   0    5.01    0.33 
   5  -5   0   13.30    0.73 
   5  -5   0   14.27    0.63 
   5   5   0   13.93    0.61 
   5   5   0   13.32    0.86 
  -5   5   0   13.72    0.96 
  -5  -5   0   13.28    0.72 
  -6   5   0   83.95    3.03 
   6   5   0   86.12    2.70 
   6  -5   0   83.09    2.80 
   6  -5   0   83.69    2.61 
   6   5   0   86.45    2.97 
  -6  -5   0   80.97    2.77 
   7   5   0    1.94    0.43 
   7  -5   0    2.28    0.42 
  -7  -5   0    3.20    0.55 
   7   5   0    2.45    0.38 
  -7   5   0    2.25    0.62 
   7  -5   0    2.82    0.38 
   8   5   0   57.35    1.99 
   8   5   0   53.86    2.23 
  -8   5   0   52.71    2.32 
  -8  -5   0   53.65    2.03 
   8  -5   0   55.24    1.87 
  -9   5   0   -0.11    0.53 
   9  -5   0   -0.16    0.31 
  -9   5   0   -0.22    0.57 
   9   5   0   -0.03    0.34 
  10  -5   0    1.08    0.53 
 -10  -5   0    1.85    0.62 
 -10   5   0    1.66    0.71 
  10  -5   0    0.84    0.45 
  10   5   0    2.62    0.56 
 -11  -5   0    0.87    0.64 
  11   5   0    0.88    0.54 
  11  -5   0   -0.05    0.58 
 -11   5   0    0.29    0.72 
 -11   5   0   -1.02    0.78 
  11   5   0    0.03    0.60 
  12  -5   0    0.96    0.69 
  12   5   0    2.18    0.66 
  12   5   0    1.53    0.76 
   0   6   0  194.02    5.67 
   0   6   0  192.94    5.82 
   0  -6   0  188.43    5.67 
   0  -6   0  196.68    5.84 
   1  -6   0   46.63    1.48 
  -1   6   0   45.75    1.54 
   1   6   0   46.96    1.63 
  -1   6   0   45.82    1.67 
  -1  -6   0   45.62    1.64 
   1  -6   0   50.14    1.55 
  -1   6   0   48.22    1.48 
  -2   6   0    3.21    0.35 
  -2  -6   0    2.78    0.39 
   2  -6   0    2.98    0.30 
  -2   6   0    2.15    0.35 
  -2   6   0    2.95    0.28 
   2   6   0    3.16    0.46 
   2  -6   0    2.91    0.32 
  -3  -6   0   93.08    3.01 
  -3   6   0   91.61    3.10 
   3   6   0   94.82    3.11 
   3  -6   0   95.91    2.85 
   3  -6   0   93.50    2.94 
   4   6   0   47.75    1.52 
  -4   6   0   47.41    1.85 
  -4  -6   0   50.28    1.53 
   4  -6   0   45.84    1.66 
   4  -6   0   48.48    1.53 
  -4  -6   0   46.61    1.70 
   4   6   0   49.18    1.84 
  -5  -6   0   -0.24    0.27 
   5  -6   0   -0.04    0.28 
   5   6   0   -0.11    0.29 
  -5  -6   0    0.30    0.34 
   5  -6   0   -0.21    0.22 
   5   6   0    0.50    0.20 
   6  -6   0   31.58    1.06 
   6   6   0   32.31    1.16 
   6  -6   0   29.75    1.28 
   6  -6   0   30.87    1.14 
   6   6   0   31.30    1.46 
  -6  -6   0   29.49    1.28 
  -6   6   0   30.00    1.57 
   7  -6   0   35.29    1.33 
  -7  -6   0   32.55    1.42 
  -7   6   0   34.49    1.75 
   7  -6   0   33.11    1.42 
   7  -6   0   35.49    1.21 
   7   6   0   34.27    1.62 
   7   6   0   34.84    1.32 
  -8   6   0   25.34    1.55 
  -8  -6   0   25.41    1.27 
   8  -6   0   26.51    1.04 
   8   6   0   25.49    1.31 
   9   6   0    1.08    0.50 
   9  -6   0    2.74    0.51 
  -9   6   0    1.98    0.70 
  -9  -6   0    3.36    0.67 
   9  -6   0    1.92    0.37 
   9   6   0    2.58    0.45 
 -10   6   0    2.99    0.84 
  10   6   0    1.92    0.64 
  10   6   0    2.99    0.53 
  10  -6   0    4.30    0.66 
 -10   6   0    5.19    0.94 
  11  -6   0    1.19    0.62 
 -11   6   0    1.67    0.81 
  11   6   0    1.12    0.67 
 -11   6   0    1.38    0.94 
   0   7   0    0.11    0.11 
   0  -7   0    0.01    0.10 
   0   7   0   -0.13    0.19 
   1   7   0   40.17    1.49 
  -1   7   0   40.86    1.32 
  -1   7   0   40.72    1.56 
  -1   7   0   41.59    1.41 
   1  -7   0   40.24    1.32 
   1  -7   0   41.77    1.41 
  -2   7   0  109.96    3.19 
   2   7   0   98.87    3.26 
  -2   7   0   98.62    3.07 
   2  -7   0  101.59    3.08 
  -2  -7   0   97.65    3.23 
  -2   7   0   94.09    3.27 
   2  -7   0   98.58    3.08 
   3   7   0   55.47    2.01 
   3  -7   0   53.92    1.82 
  -3   7   0   53.04    2.01 
   3  -7   0   56.87    1.75 
  -3  -7   0   53.87    1.93 
   4   7   0    7.27    0.88 
  -4  -7   0    6.54    0.60 
  -4  -7   0    6.60    0.37 
   4  -7   0    6.65    0.52 
   4  -7   0    6.90    0.43 
  -5   7   0  126.20    4.28 
   5   7   0  131.46    4.29 
   5  -7   0  128.58    3.89 
  -5  -7   0  125.85    4.22 
  -5  -7   0  130.79    3.90 
   6   7   0   88.19    3.15 
   6  -7   0   88.83    2.94 
   6  -7   0   87.64    2.72 
  -6   7   0   85.68    3.17 
  -6  -7   0   86.91    2.95 
   7  -7   0   40.79    1.65 
   7   7   0   40.60    1.50 
  -7  -7   0   38.51    1.67 
  -7   7   0   40.40    1.96 
   7  -7   0   44.24    1.38 
   8  -7   0    1.53    0.28 
   8   7   0    0.87    0.42 
   8   7   0    1.16    0.79 
  -8   7   0    0.84    0.75 
  -9  -7   0   10.32    0.94 
  10  -7   0    0.50    0.55 
 -10   7   0    0.39    1.04 
  10   7   0    0.51    0.59 
 -10   7   0    0.29    0.70 
 -11   7   0    2.26    1.00 
  11   7   0    2.10    0.75 
  11  -7   0    4.77    1.42 
 -11   7   0    4.35    1.12 
   0   8   0   15.60    0.88 
   0   8   0   17.15    0.82 
   0   8   0   16.04    0.57 
   1   8   0    1.29    0.30 
  -1   8   0    1.17    0.36 
  -1   8   0    1.49    0.25 
   1  -8   0    1.48    0.20 
  -1   8   0    1.67    0.29 
  -2  -8   0   26.32    1.19 
  -2   8   0   27.30    1.26 
   2   8   0   27.58    1.22 
  -2   8   0   27.20    1.02 
   2  -8   0   29.50    1.04 
   2  -8   0   27.52    1.00 
   3  -8   0   27.08    0.97 
  -3  -8   0   24.83    1.15 
   3   8   0   26.73    1.28 
   3  -8   0   24.65    1.00 
   4  -8   0   35.65    1.57 
   4  -8   0   38.34    1.29 
  -4  -8   0   36.34    1.50 
   4   8   0   38.67    1.64 
  -4   8   0   37.38    1.67 
   5   8   0    9.24    0.89 
  -5  -8   0    8.38    0.50 
   5  -8   0    9.27    0.71 
  -5  -8   0    8.74    1.14 
  -5   8   0    9.76    1.00 
   6  -8   0   25.80    1.19 
  -6  -8   0   24.13    1.23 
  -6   8   0   25.94    1.52 
   7  -8   0    1.08    0.41 
  -7   8   0    1.23    0.58 
   8  -8   0    1.86    0.50 
   8   8   0    1.12    0.59 
  -8   8   0    1.46    0.67 
  -8  -8   0    2.15    0.64 
  -9  -8   0    1.85    1.04 
  -9   8   0   -0.14    0.66 
   9   8   0    0.05    0.52 
   9  -8   0    0.03    0.51 
  10   8   0    4.48    0.85 
  10  -8   0    5.44    0.82 
 -10   8   0    9.04    1.43 
 -10   8   0    5.91    1.00 
 -10  -8   0    7.45    1.01 
 -11   8   0   -0.65    1.07 
 -11   8   0    2.24    1.07 
  11   8   0    0.07    0.82 
  11  -8   0    0.13    0.74 
   0   9   0    0.10    0.25 
   1  -9   0    3.25    0.31 
  -1   9   0    3.78    0.48 
  -1   9   0    3.77    0.35 
   1   9   0    4.47    0.60 
   2   9   0   15.99    0.98 
  -2   9   0   16.35    0.75 
   2  -9   0   15.29    0.70 
  -2   9   0   16.48    1.01 
   2  -9   0   17.83    0.81 
   3  -9   0    1.52    0.31 
   3   9   0    1.60    0.43 
  -3   9   0    2.36    0.51 
  -3   9   0    1.76    0.38 
   3  -9   0    1.82    0.29 
  -3  -9   0    1.54    0.54 
  -4   9   0   25.36    1.35 
  -4  -9   0   22.55    1.21 
   4  -9   0   24.19    1.07 
   4  -9   0   24.78    0.94 
   4   9   0   23.78    1.30 
   5  -9   0    8.43    0.72 
   5   9   0    9.81    0.98 
  -5   9   0   10.18    1.08 
   6  -9   0    0.65    0.38 
  -6  -9   0    0.71    0.54 
   6   9   0    0.42    0.67 
  -6   9   0    0.34    0.54 
  -7  -9   0    7.35    0.92 
  -8  -9   0   21.83    1.28 
   8   9   0   23.54    1.99 
   8  -9   0   21.92    1.25 
  -9   9   0    2.42    0.82 
   9  -9   0    2.41    0.64 
   9   9   0    1.95    0.66 
 -10  -9   0    9.86    1.12 
  10   9   0    9.04    1.43 
  10  -9   0    7.87    1.13 
 -10   9   0    6.29    1.08 
   0  10   0   41.06    1.60 
   0  10   0   41.05    1.73 
  -1  10   0   41.50    1.75 
   1  10   0   41.97    1.66 
  -1  10   0   42.84    1.56 
   1 -10   0   40.29    1.35 
  -1  10   0   39.86    1.36 
  -2  10   0    1.97    0.48 
   2 -10   0    2.40    0.38 
  -2  10   0    2.54    0.47 
   3 -10   0   17.13    0.82 
   3 -10   0   17.23    0.82 
  -3  10   0   18.17    1.16 
  -3  10   0   17.82    0.80 
   3  10   0   16.32    1.08 
   4 -10   0    0.16    0.25 
   4  10   0    0.09    0.39 
  -4  10   0    0.53    0.49 
   4 -10   0    0.11    0.35 
  -4 -10   0    0.29    0.51 
   5 -10   0    8.90    0.70 
  -5 -10   0    9.14    0.88 
   5  10   0   10.29    1.06 
  -5  10   0    9.65    1.09 
  -6 -10   0   -0.20    0.49 
   6  10   0   -0.23    0.41 
  -6  10   0   -0.57    0.53 
  -7 -10   0    0.76    0.57 
   7  10   0   -0.14    0.46 
  -7  10   0   -0.13    0.60 
   8 -10   0    2.32    0.65 
  -8  10   0    0.78    0.72 
   8  10   0    1.37    0.60 
   9  10   0    1.05    0.62 
   9 -10   0    0.61    0.65 
  -9 -10   0    2.44    0.81 
  -9  10   0    0.78    0.81 
  10  10   0   -0.74    0.67 
  10 -10   0   -0.45    0.73 
   0  11   0   -0.18    0.35 
  -1  11   0    0.97    0.49 
  -1  11   0    0.94    0.27 
   1  11   0    0.27    0.44 
  -1  11   0    1.28    0.36 
   2 -11   0    9.77    0.60 
  -2  11   0   11.49    0.94 
  -2  11   0   11.20    0.74 
   3  11   0    6.15    0.82 
   3 -11   0    6.01    0.63 
  -3  11   0    7.31    0.91 
  -3  11   0    7.15    0.58 
  -4  11   0   -0.33    0.48 
  -5 -11   0   17.22    1.12 
   5 -11   0   18.07    0.97 
   5  11   0   17.91    1.24 
  -5  11   0   17.94    1.39 
  -6 -11   0    6.05    0.83 
   6  11   0    3.85    0.66 
   6 -11   0    4.32    0.69 
  -6  11   0    3.98    0.80 
   7 -11   0    3.21    0.59 
  -7  11   0    2.82    0.85 
  -7 -11   0    5.07    0.79 
   7  11   0    3.19    0.68 
  -8 -11   0    1.99    0.70 
   8 -11   0    1.01    0.63 
   8  11   0    0.51    0.57 
  -8  11   0    0.07    0.74 
   9 -11   0    3.47    0.74 
  -9  11   0    2.42    0.93 
   9  11   0    2.70    0.77 
   1  12   0    0.52    0.39 
   2  12   0   -0.15    0.35 
  -2  12   0    0.05    0.29 
  -3  12   0    6.68    1.14 
   3 -12   0    7.91    0.63 
  -3  12   0    8.62    0.87 
   4 -12   0    2.70    0.49 
  -4  12   0    1.54    0.69 
   4  12   0    2.02    0.51 
  -5  12   0    0.39    0.62 
   5 -12   0    0.84    0.39 
   5  12   0    0.30    0.47 
   6  12   0    0.81    0.94 
  -6 -12   0    1.84    0.69 
   6 -12   0    1.28    0.53 
  -6  12   0    0.55    0.72 
  -7 -12   0    2.00    0.79 
   7 -12   0    0.90    0.52 
   7  12   0   -0.35    0.53 
  -7  12   0    1.78    0.87 
  -8  12   0   -0.24    0.80 
   8 -12   0    0.34    0.60 
  -9 -12   0    1.29    0.83 
  -9  12   0   -0.41    0.91 
   9  12   0   -0.10    0.69 
   9 -12   0   -1.08    0.62 
   0  13   0    0.20    0.38 
   1  13   0   -0.08    0.37 
  -1  13   0    0.19    0.38 
  -2  13   0   14.22    0.91 
   2  13   0   14.89    1.11 
  -3  13   0    8.62    1.11 
   3  13   0   11.19    1.06 
  -3  13   0    7.92    0.90 
   4  13   0    2.00    0.75 
   4 -13   0    2.47    0.50 
  -4  13   0    2.23    0.88 
   5  13   0    2.32    0.90 
  -5  13   0    2.46    0.81 
   5 -13   0    2.91    0.50 
  -6  13   0    9.37    1.22 
   6  13   0   11.86    1.26 
   7  13   0    1.82    0.68 
  -7  13   0    2.24    0.96 
   7 -13   0    3.53    0.75 
   8  13   0   13.44    2.07 
   8 -13   0   17.13    1.36 
   0  14   0   -0.46    0.66 
   0  14   0   -0.47    0.35 
  -1  14   0   -0.40    0.54 
  -1  14   0    0.01    0.38 
   2  14   0    7.30    0.98 
  -2  14   0    9.01    0.82 
  -3  14   0   15.17    0.94 
  -3  14   0   14.93    1.47 
   3  14   0   14.53    1.23 
  -4  14   0    4.31    0.91 
   4  14   0    6.71    1.07 
   5 -14   0    0.08    0.42 
  -6  14   0   -0.67    0.83 
   6 -14   0    0.59    0.60 
   6  14   0   -0.16    0.60 
   7 -14   0    3.40    0.71 
   7  14   0    1.98    0.99 
   0  15   0   -0.81    0.61 
   0  15   0   -0.45    0.39 
   1  15   0   -0.04    0.42 
  -1  15   0    0.52    0.67 
   1  15   0    0.95    0.66 
  -1  15   0    0.10    0.40 
   2  15   0   13.67    1.38 
   2  15   0   12.38    1.21 
  -2  15   0   14.76    1.51 
  -3  15   0    4.30    0.91 
   3  15   0    3.83    0.68 
   4  15   0    3.03    0.68 
  -4  15   0    1.79    0.91 
  -5  15   0   -1.46    0.82 
   5  15   0    0.28    0.60 
  -6  15   0    0.72    1.19 
   0  16   0   10.03    1.55 
   0  16   0    6.86    1.00 
   1  16   0   12.23    1.19 
  -1  16   0   12.28    1.61 
  -1  16   0   11.77    1.02 
  -2  16   0    0.60    0.79 
   2  16   0    1.17    0.81 
   3  16   0    5.09    0.95 
   3  16   0    4.46    0.71 
  -3  16   0    2.85    1.00 
   4  16   0    0.14    0.60 
   5  16   0    2.11    0.74 
  -5  16   0    0.38    1.10 
   1  17   0   -0.79    0.56 
   2  17   0    0.81    1.01 
  -2  17   0    0.46    1.02 
  -3  17   0   -1.47    0.91 
   3  17   0    2.34    0.91 
  -2   0   1  126.20    3.99 
  -2   0   1  139.49    3.94 
  -2   0  -1  140.12    3.95 
   2   0   1  139.63    3.98 
  -2   0  -1  126.90    3.96 
   2   0   1  131.90    3.94 
  -2   0  -1  131.01    3.97 
   2   0  -1  134.55    4.00 
   2   0   1  127.89    3.94 
  -2   0  -1  118.04    3.92 
   2   0  -1  130.19    3.94 
   2   0   1  138.32    3.97 
  -3   0  -1  126.63    3.93 
  -3   0  -1  138.26    3.89 
  -3   0   1  125.77    3.95 
   3   0   1  121.72    3.87 
   3   0   1  135.76    3.95 
  -3   0   1  136.38    3.88 
   3   0  -1  133.78    3.97 
  -3   0   1  123.37    3.84 
  -3   0  -1  128.05    3.90 
   3   0  -1  127.39    3.87 
  -3   0  -1  113.29    3.84 
   3   0   1  129.59    3.88 
  -4   0  -1   74.44    2.42 
   4   0   1   76.40    2.39 
   4   0   1   74.57    2.39 
  -4   0   1   74.47    2.48 
  -4   0   1   75.82    2.36 
  -4   0  -1   76.70    2.47 
   4   0  -1   75.63    2.38 
   5   0   1  345.00   10.29 
  -5   0   1  343.49   10.25 
  -5   0  -1  344.63   10.37 
   5   0  -1  319.91   10.26 
  -5   0   1  345.66   10.39 
   5   0  -1  348.86   10.28 
  -5   0  -1  346.47   10.31 
   5   0   1  365.94   10.30 
  -6   0   1   42.58    1.51 
  -6   0   1   41.46    1.68 
   6   0  -1   41.30    1.51 
   6   0   1   42.29    1.52 
   6   0   1   41.65    1.53 
  -6   0  -1   42.22    1.57 
  -6   0  -1   40.60    1.65 
   6   0  -1   42.84    1.53 
   7   0  -1   -0.32    0.19 
  -7   0  -1    0.12    0.41 
  -7   0  -1   -0.27    0.41 
  -7   0   1   -0.17    0.38 
   7   0   1   -0.28    0.28 
   7   0  -1   -0.05    0.29 
  -7   0   1   -0.02    0.40 
   7   0   1   -0.06    0.23 
  -8   0   1   10.23    0.81 
  -8   0   1   10.51    0.98 
   8   0   1    9.93    0.72 
  -8   0  -1    9.39    0.93 
   8   0  -1    9.94    0.71 
   8   0  -1   11.29    0.76 
  -8   0  -1   10.10    0.90 
   8   0   1    7.46    0.91 
   9   0  -1    2.76    0.44 
   9   0  -1    1.79    0.42 
  -9   0   1    3.69    0.68 
   9   0   1    1.83    0.44 
   9   0   1    2.56    0.45 
  -9   0   1    2.42    0.59 
  -9   0  -1    2.54    0.58 
  -9   0  -1    3.71    0.70 
  10   0   1    0.81    0.44 
  10   0   1    0.12    0.39 
 -10   0   1   -0.15    0.52 
  10   0  -1    0.04    0.35 
  10   0  -1   -0.77    0.40 
 -10   0  -1   -0.15    0.57 
 -10   0  -1    0.30    0.51 
  11   0   1   -0.47    0.50 
  11   0  -1    0.85    0.63 
 -11   0  -1    0.82    0.63 
 -11   0   1    1.08    0.61 
  11   0  -1    0.85    0.53 
 -11   0   1    1.64    0.64 
 -12   0   1    1.24    0.91 
  12   0  -1   -0.55    0.57 
  12   0   1   -0.68    0.58 
 -12   0  -1   -0.17    0.76 
 -12   0  -1    1.76    0.85 
  12   0  -1   -0.76    0.68 
  12   0   1    0.14    0.63 
 -12   0   1    0.79    0.74 
   1   1  -1  426.43   12.90 
  -1   1   1  471.13   12.88 
   1  -1   1  414.81   12.90 
  -1  -1  -1  463.38   12.93 
  -1  -1   1  387.96   12.85 
  -1   1  -1  474.87   12.87 
  -2  -1  -1   13.06    0.47 
   2  -1   1   12.38    0.44 
   2   1  -1   12.19    0.57 
   2  -1   1   13.64    0.58 
  -2  -1  -1   12.94    0.54 
   2   1  -1   14.11    0.46 
  -2   1   1   12.94    0.60 
   2   1  -1   12.18    0.46 
  -2  -1  -1   12.18    0.49 
  -2  -1  -1   11.68    0.54 
  -2   1  -1   12.99    0.58 
  -2  -1   1   11.00    0.56 
   2   1   1   12.52    0.47 
  -2   1  -1   11.80    0.43 
   2   1   1   11.75    0.51 
   2   1   1   12.54    0.54 
  -2  -1   1   12.52    0.46 
  -2  -1   1   12.44    0.46 
   2  -1  -1   13.08    0.61 
   2   1   1   12.32    0.55 
   3  -1   1   64.56    2.09 
   3   1  -1   60.77    2.14 
  -3  -1  -1   64.56    2.13 
   3   1  -1   66.78    2.11 
   3   1  -1   69.11    2.09 
   3   1  -1   66.99    2.21 
  -3  -1  -1   72.30    2.13 
  -3  -1  -1   64.57    2.17 
  -3  -1  -1   65.56    2.16 
  -3   1   1   65.34    2.21 
   3  -1   1   66.80    2.14 
   3  -1   1   71.28    2.21 
  -3   1   1   70.24    2.14 
  -3  -1   1   68.99    2.10 
  -3   1  -1   70.17    2.14 
  -3  -1   1   72.93    2.13 
   3   1   1   74.06    2.22 
  -3   1  -1   66.08    2.19 
   3   1   1   65.98    2.16 
   3   1   1   68.35    2.12 
   3   1   1   72.93    2.17 
   3  -1  -1   66.13    2.13 
   3  -1  -1   71.76    2.23 
  -3   1  -1   68.38    2.18 
  -3  -1   1   66.58    2.20 
   4   1  -1  185.35    5.95 
   4  -1   1  196.74    5.91 
   4   1  -1  203.06    5.93 
  -4  -1  -1  200.85    5.97 
  -4   1   1  200.54    6.04 
  -4  -1  -1  198.47    6.01 
   4  -1   1  203.81    5.95 
   4   1   1  203.71    5.93 
   4  -1  -1  198.15    5.94 
   4   1   1  191.31    5.97 
  -4  -1   1  193.44    6.02 
  -4   1  -1  191.02    5.97 
   4   1   1  203.12    5.96 
  -4   1  -1  194.38    6.01 
  -4  -1   1  197.17    5.90 
  -5   1   1  251.74    7.79 
  -5  -1  -1  252.03    7.83 
  -5  -1  -1  259.18    7.91 
   5  -1   1  258.44    7.79 
   5  -1   1  264.19    7.83 
   5   1  -1  252.31    7.84 
  -5   1   1  256.20    7.93 
   5   1  -1  266.43    7.81 
   5   1   1  261.42    7.86 
  -5   1  -1  266.87    7.86 
  -5  -1   1  253.33    7.92 
  -5  -1   1  259.62    7.78 
   5  -1  -1  268.64    7.83 
   5   1   1  274.48    7.82 
  -5   1  -1  259.79    7.91 
  -6   1   1   31.22    1.41 
  -6  -1  -1   31.04    1.38 
   6   1  -1   31.95    1.22 
   6  -1   1   32.82    1.27 
  -6   1   1   31.80    1.23 
  -6  -1  -1   31.47    1.27 
   6   1  -1   29.38    1.23 
   6  -1   1   31.66    1.20 
  -6  -1   1   33.41    1.21 
  -6  -1   1   31.96    1.40 
   6   1   1   32.87    1.23 
  -6   1  -1   31.56    1.40 
   6  -1  -1   32.79    1.27 
   6  -1  -1   29.82    1.18 
   6   1   1   31.64    1.27 
  -6   1  -1   31.78    1.29 
   7  -1   1   17.94    0.93 
  -7   1   1   17.93    1.16 
   7   1  -1   19.87    0.97 
  -7   1   1   18.68    0.95 
   7   1  -1   18.72    1.03 
   7  -1   1   18.67    0.90 
  -7  -1  -1   18.06    1.14 
  -7  -1  -1   19.07    1.01 
  -7  -1   1   17.76    1.11 
  -7   1  -1   19.60    1.01 
  -7   1  -1   17.78    1.15 
   7   1   1   20.22    0.98 
   7   1   1   18.49    1.00 
   7  -1  -1   19.56    0.93 
  -7  -1   1   18.18    0.92 
   7  -1  -1   20.03    0.89 
  -8   1   1   20.62    1.29 
   8   1  -1   20.51    1.01 
   8   1  -1   22.30    1.08 
  -8   1   1   21.07    1.08 
   8  -1   1   20.23    1.04 
  -8  -1  -1   21.53    1.17 
  -8  -1  -1   20.83    1.23 
   8  -1   1   19.69    1.05 
   8   1   1   21.43    1.14 
  -8  -1   1   19.32    1.24 
  -8  -1   1   20.76    1.05 
   8   1   1   21.22    1.03 
   8  -1  -1   20.75    1.02 
   8  -1  -1   19.84    1.15 
  -8   1  -1   20.44    1.26 
  -9  -1  -1   18.96    1.15 
   9   1  -1   20.23    1.08 
  -9  -1  -1   19.57    1.25 
   9  -1   1   17.95    1.03 
  -9   1   1   18.95    1.24 
   9  -1   1   17.62    1.09 
   9   1  -1   19.51    1.02 
  -9   1  -1   16.33    1.21 
  -9  -1   1   18.53    1.07 
   9  -1  -1   19.71    1.03 
  -9   1  -1   17.60    1.12 
   9  -1  -1   17.50    1.01 
  -9  -1   1   18.83    1.23 
   9   1   1   18.75    1.09 
   9   1   1   17.40    1.00 
 -10   1   1   11.33    1.20 
 -10   1   1   11.42    1.00 
  10  -1   1   10.54    0.94 
 -10  -1  -1   12.63    1.22 
  10   1  -1   10.51    0.86 
  10  -1   1   10.58    0.90 
 -10  -1  -1   10.34    0.98 
  10   1  -1    9.77    1.04 
 -10  -1   1    9.96    1.00 
 -10   1  -1   10.98    1.02 
  10   1   1   10.94    0.90 
  10  -1  -1   11.45    0.91 
  10   1   1    9.79    0.99 
 -10   1  -1   10.18    1.13 
  10  -1  -1   10.52    0.91 
 -10  -1   1   12.22    1.22 
  11   1  -1    6.37    1.05 
 -11   1   1    7.51    1.06 
  11  -1   1    5.49    0.98 
 -11  -1  -1    5.90    0.95 
 -11   1   1    8.60    1.25 
  11  -1   1    6.20    0.78 
  11   1   1    4.63    0.70 
  11  -1  -1    5.66    0.88 
 -11  -1   1    7.39    0.92 
  12   1  -1    1.45    0.66 
 -12  -1  -1    3.50    0.85 
 -12   1   1    4.27    1.01 
  12  -1   1    1.74    0.64 
  12   1  -1    2.46    0.64 
  12  -1   1    2.94    0.68 
  12  -1  -1    2.12    0.66 
  12  -1  -1    0.89    0.58 
 -12   1  -1    3.51    0.93 
  12   1   1    1.95    0.61 
  12   1   1    2.04    0.69 
   0   2   1  122.12    3.49 
   0   2   1  114.86    3.54 
   0   2   1  128.04    3.57 
   0   2  -1  107.06    3.51 
   0  -2  -1  121.65    3.54 
  -1   2   1  496.98   13.79 
   1  -2   1  481.95   13.82 
  -1   2   1  460.73   13.83 
   1   2  -1  413.65   13.80 
  -1  -2  -1  482.79   13.83 
  -1  -2  -1  446.89   13.84 
  -1   2  -1  452.59   13.82 
   1   2   1  469.81   13.83 
   1  -2  -1  461.54   13.82 
   1  -2  -1  488.59   13.83 
  -1   2  -1  512.24   13.79 
   1   2   1  488.36   13.83 
  -2  -2  -1  115.60    3.69 
  -2   2   1  125.88    3.66 
  -2  -2  -1  117.25    3.68 
   2   2  -1  119.85    3.70 
  -2  -2  -1  123.57    3.62 
   2   2  -1  120.69    3.62 
   2  -2   1  126.19    3.70 
   2   2  -1  103.42    3.67 
   2  -2   1  120.54    3.66 
   2   2  -1  117.73    3.61 
  -2   2  -1  129.97    3.66 
   2   2   1  126.59    3.69 
   2  -2  -1  126.68    3.72 
   2   2   1  123.01    3.62 
  -2  -2   1  129.04    3.62 
  -2  -2   1  119.96    3.62 
  -2   2  -1  122.90    3.71 
   2   2   1  120.62    3.71 
   2  -2  -1  121.16    3.66 
  -3  -2  -1  123.71    3.82 
  -3  -2  -1  114.47    3.82 
  -3  -2  -1  133.92    3.77 
   3   2  -1  116.64    3.82 
   3  -2   1  117.04    3.72 
   3  -2   1  129.93    3.86 
  -3   2   1  119.98    3.88 
  -3   2   1  127.59    3.81 
   3  -2   1  122.98    3.80 
   3   2  -1  129.84    3.76 
   3   2  -1  124.35    3.87 
   3   2  -1  127.09    3.77 
  -3   2  -1  129.88    3.82 
   3   2   1  129.47    3.77 
  -3  -2   1  122.72    3.76 
   3   2   1  126.92    3.86 
   3   2   1  121.52    3.86 
   3  -2  -1  128.62    3.89 
   3   2   1  129.33    3.83 
   3  -2  -1  122.80    3.80 
  -3   2  -1  123.48    3.86 
  -3  -2   1  132.02    3.77 
   4   2  -1   28.17    0.97 
   4   2  -1   27.84    0.96 
   4  -2   1   25.09    0.92 
  -4  -2  -1   30.54    1.08 
   4   2  -1   24.77    1.02 
  -4   2   1   27.34    1.15 
  -4  -2  -1   27.78    1.04 
   4  -2   1   26.92    1.01 
  -4  -2   1   30.98    1.09 
   4   2   1   26.91    1.04 
  -4  -2   1   25.94    1.09 
  -4  -2   1   27.11    0.96 
   4   2   1   27.24    0.97 
   4   2   1   25.86    1.06 
  -4   2  -1   26.20    1.11 
   4  -2  -1   26.70    1.01 
   5   2  -1   24.56    1.03 
   5   2  -1   27.25    0.98 
   5  -2   1   26.30    1.03 
   5  -2   1   26.34    0.94 
  -5   2   1   26.58    1.19 
   5   2  -1   28.15    1.00 
  -5  -2  -1   26.42    1.14 
  -5  -2  -1   26.08    1.07 
  -5   2  -1   24.80    1.08 
  -5  -2   1   25.77    0.98 
   5  -2  -1   25.52    1.03 
  -5  -2   1   24.76    1.15 
  -5   2  -1   25.04    1.16 
   5   2   1   25.00    1.08 
   5   2   1   26.16    1.00 
  -6  -2  -1   74.60    2.47 
   6   2  -1   72.39    2.41 
   6  -2   1   71.96    2.36 
  -6   2   1   72.03    2.44 
  -6   2   1   73.59    2.63 
   6   2  -1   72.88    2.49 
  -6  -2  -1   73.02    2.57 
   6  -2   1   74.32    2.54 
   6  -2  -1   71.54    2.50 
  -6  -2   1   74.83    2.39 
  -6   2  -1   73.03    2.59 
   6   2   1   74.08    2.53 
   6  -2  -1   72.12    2.37 
  -6   2  -1   71.89    2.48 
  -6  -2   1   73.74    2.61 
   6   2   1   75.32    2.43 
  -7  -2  -1    5.96    0.83 
   7  -2   1    6.14    0.59 
  -7  -2  -1    5.71    0.71 
  -7   2   1    5.43    0.63 
   7  -2   1    6.08    0.51 
   7   2  -1    5.98    0.65 
   7   2  -1    6.17    0.73 
  -7   2   1    6.79    0.91 
  -7  -2   1    6.14    0.80 
  -7  -2   1    6.63    0.61 
  -7   2  -1    6.17    0.77 
   7   2   1    5.39    0.87 
   7  -2  -1    5.90    0.59 
  -7   2  -1    5.44    0.87 
   7  -2  -1    5.47    0.51 
   8  -2   1    2.83    0.54 
  -8  -2  -1    2.73    0.56 
   8   2  -1    2.41    0.40 
  -8  -2  -1    3.56    0.65 
   8   2  -1    2.73    0.43 
   8  -2   1    2.76    0.45 
  -8   2   1    2.15    0.59 
  -8   2   1    3.65    0.63 
  -8  -2   1    3.35    0.56 
   8  -2  -1    2.01    0.43 
  -8   2  -1    3.79    0.67 
   8  -2  -1    4.11    0.56 
   8   2   1    2.56    0.44 
   8   2   1    2.37    0.43 
  -8  -2   1    3.07    0.58 
  -8   2  -1    2.41    0.58 
   9  -2   1    4.92    0.65 
  -9  -2  -1    6.95    0.95 
  -9   2   1    6.67    0.97 
   9   2  -1    5.89    0.75 
  -9   2   1    5.67    0.81 
  -9  -2  -1    6.01    0.82 
  -9  -2   1    6.42    0.75 
   9   2   1    5.40    0.78 
  -9   2  -1    6.39    0.81 
   9  -2  -1    7.24    0.71 
   9   2   1    6.14    0.85 
   9  -2  -1    7.94    0.72 
  -9  -2   1    6.53    0.93 
  -9   2  -1    4.72    0.72 
  10  -2   1   11.94    0.95 
 -10   2   1   11.88    1.33 
  10  -2   1   13.07    1.07 
 -10  -2  -1   12.07    1.01 
  10   2  -1   12.17    0.92 
 -10   2   1   11.27    1.03 
 -10   2  -1   12.93    1.21 
 -10  -2   1   11.93    1.31 
  10  -2  -1   12.93    0.91 
  10   2   1   11.90    0.90 
  10  -2  -1   10.23    0.97 
 -10   2  -1   11.83    1.24 
 -11   2   1    6.07    0.89 
  11  -2   1    6.02    0.77 
  11  -2   1    6.21    1.18 
 -11   2   1    7.79    1.26 
  11   2  -1    4.55    0.70 
  11   2  -1    4.28    0.75 
 -11  -2  -1    6.65    0.94 
 -11  -2   1    5.98    0.87 
 -11   2  -1    7.64    1.24 
  11  -2  -1    5.36    0.86 
  11  -2  -1    4.49    0.70 
  11   2   1    5.59    0.86 
  11   2   1    6.23    1.10 
  12   2  -1    4.90    0.71 
  12   2  -1    2.79    0.73 
 -12   2   1    4.36    1.38 
  12  -2   1    3.63    0.88 
  12   2   1    3.84    0.70 
 -12   2  -1    4.66    0.93 
  12   2   1    2.93    0.75 
 -12   2  -1    2.92    1.11 
  12  -2  -1    5.48    0.87 
  12  -2  -1    2.33    0.63 
   0  -3  -1  344.02    9.99 
   0   3  -1  349.39    9.99 
   0  -3  -1  351.80   10.06 
   0  -3  -1  342.62   10.09 
   0   3   1  348.15   10.09 
   0   3   1  348.24    9.99 
   0   3  -1  332.74   10.05 
   0  -3   1  321.84   10.02 
   0   3   1  336.29   10.06 
   1   3  -1   27.72    0.94 
  -1   3   1   27.69    0.92 
   1  -3   1   25.87    0.85 
  -1   3   1   28.17    0.90 
   1  -3   1   28.11    0.97 
  -1   3   1   27.80    0.97 
  -1  -3  -1   25.59    0.97 
   1  -3   1   27.79    0.89 
   1   3  -1   25.07    0.93 
  -1  -3  -1   27.74    0.97 
   1  -3  -1   28.27    0.90 
   1   3   1   28.14    0.98 
  -1   3  -1   30.31    0.90 
  -1   3  -1   29.02    0.86 
  -1  -3   1   24.71    0.94 
   1  -3  -1   29.71    0.93 
   1   3   1   28.40    0.98 
   1  -3  -1   29.16    0.99 
  -1  -3   1   27.65    0.93 
  -1   3  -1   27.99    0.97 
   2  -3   1  750.89   21.91 
  -2   3   1  790.63   21.86 
   2   3  -1  703.17   21.90 
   2   3  -1  761.71   21.88 
  -2   3   1  715.76   21.92 
   2  -3   1  765.90   21.86 
  -2  -3  -1  717.65   21.89 
  -2  -3  -1  738.59   21.92 
   2  -3  -1  735.49   21.93 
   2  -3  -1  725.82   21.85 
   2   3   1  736.45   21.93 
  -2   3  -1  692.59   21.90 
   2   3   1  788.64   21.95 
  -2   3  -1  808.70   21.87 
  -2  -3   1  770.72   21.80 
  -3   3   1   50.38    1.73 
  -3  -3  -1   50.00    1.66 
   3  -3   1   49.84    1.63 
  -3  -3  -1   52.78    1.57 
   3  -3   1   43.47    1.50 
   3   3  -1   49.72    1.56 
   3   3  -1   52.45    1.60 
   3   3  -1   43.86    1.66 
   3  -3  -1   50.12    1.63 
  -3  -3   1   51.96    1.57 
   3   3   1   51.47    1.77 
   3   3   1   50.59    1.57 
  -3  -3   1   50.13    1.59 
   3   3   1   51.04    1.67 
  -3   3  -1   49.53    1.70 
   4   3  -1  180.41    5.89 
   4  -3   1  189.04    5.85 
   4   3  -1  200.10    5.80 
  -4  -3  -1  209.47    5.80 
  -4   3   1  193.95    5.96 
   4  -3   1  178.65    5.72 
   4   3  -1  195.47    5.78 
  -4  -3  -1  189.58    5.86 
   4   3   1  192.69    5.94 
  -4  -3   1  188.41    5.79 
  -4  -3   1  204.52    5.79 
   4   3   1  198.24    5.79 
  -4   3  -1  190.96    5.93 
   4  -3  -1  194.52    5.86 
   5   3  -1   14.15    0.75 
   5   3  -1   15.07    0.66 
  -5   3   1   14.26    0.92 
   5   3  -1   15.58    0.71 
  -5  -3  -1   14.83    0.75 
   5  -3   1   14.39    0.72 
   5  -3   1   14.70    0.59 
   5   3   1   14.47    0.80 
   5   3   1   14.89    0.67 
   5  -3  -1   14.39    0.72 
  -5  -3   1   14.85    0.68 
  -5   3  -1   15.70    0.90 
  -6  -3  -1   25.92    1.11 
   6   3  -1   24.90    1.14 
   6   3  -1   26.30    1.03 
   6  -3   1   26.08    0.96 
  -6  -3   1   25.22    1.03 
   6  -3  -1   21.36    1.44 
  -6   3  -1   24.52    1.30 
   6   3   1   25.83    1.20 
   6   3   1   26.15    1.03 
   7   3  -1    2.48    0.41 
   7  -3   1    3.65    0.43 
   7   3  -1    2.77    0.43 
  -7  -3  -1    3.47    0.55 
  -7   3   1    2.68    0.60 
   7  -3   1    2.76    0.42 
   7   3   1    3.02    0.45 
   7   3   1    2.48    0.44 
   7  -3  -1    1.93    0.39 
  -7   3  -1    2.81    0.59 
   7  -3  -1    3.25    0.43 
  -7  -3   1    3.71    0.52 
  -7   3  -1    3.53    0.70 
   8   3  -1   18.32    1.04 
  -8  -3  -1   17.18    1.05 
   8  -3   1   16.51    0.88 
   8   3  -1   17.98    0.92 
  -8   3   1   17.52    1.27 
  -8   3  -1   19.39    1.27 
   8   3   1   17.36    0.93 
  -8  -3   1   17.60    0.94 
  -8   3  -1   17.38    1.09 
   8   3   1   18.50    1.09 
   8  -3  -1   17.86    0.88 
  -9   3   1    5.17    0.77 
   9  -3   1    5.10    0.70 
  -9   3   1    5.94    0.80 
  -9  -3  -1    6.16    0.82 
   9   3  -1    4.90    0.62 
   9   3  -1    5.13    0.71 
  -9  -3   1    4.58    0.68 
  -9   3  -1    4.66    0.74 
  -9   3  -1    4.90    0.79 
   9   3   1    4.87    0.65 
   9   3   1    3.34    0.55 
  10  -3   1    2.81    0.54 
  10   3  -1    2.33    0.54 
 -10   3   1    3.28    0.72 
 -10  -3  -1    2.93    0.66 
  10   3  -1    2.91    0.53 
  10  -3  -1    2.57    0.46 
 -10   3  -1    3.03    0.71 
  10   3   1    2.59    0.51 
 -10   3  -1    3.04    0.72 
 -11  -3  -1    6.02    0.93 
 -11   3   1    5.20    1.28 
  11  -3   1    5.03    0.76 
  11   3  -1    4.66    1.12 
  11  -3   1    5.00    0.92 
 -11   3   1    6.69    1.27 
  11  -3  -1    5.90    0.97 
 -11  -3   1    5.85    0.84 
 -11   3  -1    6.81    1.01 
 -11   3  -1    5.15    0.89 
  11  -3  -1    6.43    0.94 
  12  -3   1    0.89    1.22 
 -12   3   1    2.49    0.90 
  12   3  -1    1.39    0.67 
  12   3  -1    2.95    0.65 
  12   3   1    3.08    0.65 
 -12   3  -1    4.64    1.14 
 -12   3  -1    1.69    1.06 
  12   3   1    1.53    0.71 
   0  -4  -1   39.35    1.43 
   0   4   1   43.02    1.30 
   0  -4  -1   43.60    1.40 
   0   4  -1   43.81    1.38 
   0  -4   1   39.80    1.34 
   0   4   1   42.21    1.40 
   0   4   1   43.36    1.45 
   0   4  -1   44.48    1.29 
   0  -4  -1   42.92    1.30 
   1   4  -1   80.22    2.61 
  -1   4   1   84.30    2.58 
  -1   4   1   80.77    2.65 
  -1   4   1   85.62    2.65 
  -1   4   1   87.39    2.54 
   1   4  -1   87.90    2.62 
  -1  -4  -1   86.43    2.64 
   1  -4   1   83.78    2.52 
   1  -4   1   85.41    2.54 
  -1  -4  -1   83.63    2.64 
   1   4   1   85.40    2.65 
  -1  -4   1   77.63    2.58 
  -1   4  -1   83.00    2.52 
   1  -4  -1   84.83    2.58 
   1  -4  -1   83.05    2.65 
   1   4   1   82.57    2.64 
  -1   4  -1   90.33    2.56 
   1  -4  -1   82.46    2.54 
  -1   4  -1   81.53    2.65 
   2   4  -1   75.45    2.19 
   2  -4   1   74.11    2.37 
   2  -4   1   71.90    2.27 
   2   4  -1   77.57    2.30 
  -2  -4  -1   73.48    2.35 
  -2   4   1   74.37    2.27 
  -2  -4  -1   76.40    2.20 
   2   4  -1   67.08    2.33 
  -2   4   1   71.71    2.37 
  -2  -4   1   76.18    2.19 
  -2  -4   1   64.22    2.31 
   2   4   1   74.94    2.52 
   2  -4  -1   75.63    2.26 
   2  -4  -1   71.23    2.27 
  -2   4  -1   73.23    2.37 
   2   4   1   73.35    2.38 
  -2  -4   1   71.34    2.29 
  -2   4  -1   76.14    2.28 
  -3  -4  -1  246.63    6.91 
   3   4  -1  233.56    6.90 
   3  -4   1  229.12    6.99 
   3   4  -1  242.99    7.00 
  -3   4   1  228.43    7.09 
  -3  -4  -1  228.15    7.03 
   3   4  -1  227.65    7.07 
  -3   4  -1  229.23    7.07 
  -3  -4   1  226.66    6.97 
  -3  -4   1  243.60    6.90 
   3   4   1  237.22    7.10 
   3  -4  -1  227.31    6.99 
   3  -4  -1  239.58    6.94 
   3   4   1  233.90    7.04 
  -4  -4  -1   30.52    1.04 
   4  -4   1   28.32    1.10 
   4   4  -1   30.20    1.09 
   4  -4   1   29.23    0.95 
  -4  -4  -1   29.09    1.14 
  -4   4   1   28.33    1.26 
   4   4  -1   29.96    1.02 
   4   4  -1   28.76    1.17 
   4   4   1   29.67    1.22 
   4   4   1   31.16    1.04 
  -4   4  -1   29.94    1.25 
   4  -4  -1   29.55    1.11 
  -4  -4   1   31.61    1.04 
  -4  -4   1   30.15    1.08 
   5   4  -1   19.18    0.92 
  -5  -4  -1   17.87    0.87 
   5  -4   1   18.58    0.69 
  -5   4   1   18.78    1.05 
   5   4  -1   19.26    0.85 
   5   4  -1   19.19    0.77 
   5  -4   1   20.07    0.87 
  -5   4  -1   19.26    1.04 
   5   4   1   19.55    0.78 
   5   4   1   19.33    0.97 
   5  -4  -1   18.31    0.85 
  -5  -4   1   19.26    0.81 
   6   4  -1   34.33    1.27 
   6  -4   1   35.06    1.19 
  -6   4   1   33.16    1.61 
  -6  -4  -1   34.31    1.37 
   6   4  -1   35.25    1.62 
   6  -4   1   34.75    1.37 
   6  -4  -1   35.07    1.36 
   6   4   1   35.22    1.29 
  -6  -4   1   34.01    1.29 
   7  -4   1   19.45    1.00 
   7  -4   1   22.05    0.88 
  -7   4   1   20.46    1.29 
   7   4  -1   22.62    1.13 
   7   4  -1   19.99    0.96 
  -7  -4  -1   20.59    1.06 
  -7   4  -1   21.02    1.26 
   7   4   1   20.67    0.98 
   7   4   1   20.99    1.15 
  -7  -4   1   20.08    0.96 
   7  -4  -1   23.21    0.90 
   7  -4  -1   20.07    1.03 
   8   4  -1    3.42    0.61 
   8   4  -1    2.90    0.45 
  -8  -4  -1    3.23    0.61 
  -8   4   1    2.85    0.61 
  -8   4   1    1.18    0.59 
   8  -4   1    2.12    0.35 
   8  -4  -1    2.21    0.34 
   8   4   1    2.63    0.47 
  -8   4  -1    3.51    0.65 
  -8  -4   1    3.39    0.61 
   8   4   1    2.13    0.42 
  -8   4  -1    2.08    0.59 
   9   4  -1    2.80    0.47 
   9  -4   1    2.47    0.43 
  -9   4   1    3.22    0.65 
  -9   4   1    2.21    1.10 
  -9  -4  -1    4.13    0.71 
   9  -4  -1    2.66    0.42 
  -9   4  -1    2.18    0.64 
   9   4   1    4.01    0.63 
  -9   4  -1    4.63    0.81 
  10   4  -1    2.42    0.56 
  10   4  -1    2.77    0.52 
 -10  -4  -1    3.50    0.66 
 -10   4   1    2.90    0.83 
  10  -4   1    2.77    0.55 
  10  -4   1    3.66    0.61 
 -10   4   1    2.69    0.72 
  10  -4  -1    3.62    0.49 
  10  -4  -1    2.99    0.58 
  10   4   1    4.19    0.56 
  10   4   1    2.88    0.62 
 -11  -4  -1    7.41    0.99 
  11   4  -1    5.74    0.80 
  11   4  -1    3.71    0.72 
 -11   4   1    5.59    0.95 
  11  -4   1    5.60    0.96 
  11  -4   1    4.94    0.74 
  11   4   1    7.01    1.04 
 -11   4  -1    8.97    1.35 
  11  -4  -1    5.99    0.83 
 -11   4  -1    7.44    1.08 
 -11  -4   1    8.06    0.95 
  11  -4  -1    6.97    0.94 
  11   4   1    4.57    0.78 
  12   4  -1    1.24    0.63 
  12   4  -1   -0.06    0.68 
 -12   4   1    1.75    1.05 
  12  -4   1    0.32    0.65 
  12  -4  -1    3.40    0.77 
 -12   4  -1    3.43    1.04 
  12   4   1    0.86    0.70 
   0  -5   1    5.77    0.34 
   0   5  -1    6.43    0.47 
   0  -5  -1    6.82    0.44 
   0   5  -1    6.73    0.27 
   0   5   1    6.36    0.27 
   0  -5  -1    6.13    0.47 
   0  -5  -1    6.41    0.27 
   0   5   1    6.92    0.42 
   0   5  -1    6.22    0.37 
   1   5  -1   42.31    1.43 
  -1   5   1   41.07    1.31 
   1  -5   1   41.03    1.31 
  -1  -5  -1   40.93    1.44 
   1   5  -1   40.93    1.43 
   1  -5   1   42.54    1.32 
  -1   5   1   41.26    1.38 
  -1  -5  -1   40.75    1.46 
  -1   5   1   39.31    1.46 
   1  -5  -1   41.53    1.32 
  -1   5  -1   40.25    1.45 
  -1   5  -1   43.09    1.33 
   1   5   1   42.75    1.46 
   1  -5  -1   41.74    1.38 
  -1  -5   1   41.34    1.39 
  -1   5  -1   44.95    1.33 
  -2   5   1    5.08    0.47 
   2   5  -1    5.37    0.42 
  -2   5   1    5.64    0.34 
  -2   5   1    5.74    0.36 
  -2  -5  -1    5.07    0.43 
   2   5  -1    5.32    0.41 
   2  -5   1    5.51    0.33 
  -2   5  -1    5.15    0.36 
  -2  -5   1    4.98    0.39 
   2  -5  -1    5.09    0.35 
   2  -5  -1    4.80    0.34 
  -2   5  -1    5.21    0.47 
   2   5   1    4.84    0.46 
   3   5  -1   43.14    1.34 
  -3  -5  -1   44.86    1.35 
  -3  -5  -1   40.86    1.51 
  -3   5   1   41.74    1.59 
   3   5  -1   42.36    1.47 
   3  -5   1   40.81    1.44 
   3   5  -1   40.76    1.54 
   3  -5  -1   45.43    1.41 
  -3   5  -1   42.13    1.58 
  -3  -5   1   45.43    1.34 
   3   5   1   42.18    1.58 
   3  -5  -1   42.60    1.45 
  -3  -5   1   43.25    1.47 
   4   5  -1   18.39    0.91 
  -4   5   1   18.73    1.01 
   4  -5   1   17.64    0.80 
   4   5  -1   20.06    0.71 
  -4  -5  -1   20.55    0.73 
   4   5  -1   19.67    0.93 
  -4  -5  -1   18.23    0.85 
  -4  -5   1   19.66    0.72 
   4  -5  -1   18.70    0.82 
  -4  -5   1   19.11    0.80 
  -4   5  -1   18.11    0.97 
   4  -5  -1   18.85    0.76 
   4   5   1   18.55    0.95 
   5  -5   1   15.92    0.60 
   5   5  -1   16.03    0.91 
  -5  -5  -1   15.79    0.83 
   5   5  -1   16.91    0.70 
   5  -5   1   16.39    0.82 
  -5   5   1   16.07    1.06 
   5  -5   1   17.13    0.65 
   5   5   1   18.70    0.72 
  -5  -5   1   17.16    0.78 
   5   5   1   18.84    1.01 
  -5   5  -1   17.13    1.06 
   5  -5  -1   17.86    0.77 
   5  -5  -1   16.94    0.83 
   6  -5   1   -0.01    0.29 
  -6   5   1    0.34    0.50 
   6   5  -1    0.05    0.26 
   6   5  -1    0.03    0.24 
   6  -5   1    0.00    0.15 
  -6  -5  -1   -0.35    0.64 
  -6   5  -1    0.43    0.55 
   6  -5  -1    0.12    0.29 
   6   5   1   -0.09    0.32 
   6   5   1   -0.24    0.24 
  -6  -5   1   -0.09    0.31 
   7   5  -1   15.64    1.00 
  -7  -5  -1   15.97    0.98 
   7  -5   1   15.48    0.91 
   7   5  -1   15.77    0.83 
   7  -5   1   17.32    0.73 
  -7   5   1   16.87    1.27 
  -7   5  -1   17.41    1.25 
   7   5   1   16.57    1.07 
   7  -5  -1   15.40    0.90 
   7   5   1   16.93    0.86 
   7  -5  -1   19.30    0.83 
  -7  -5   1   17.23    0.88 
  -8   5   1   30.56    1.65 
   8  -5   1   25.59    1.15 
   8   5  -1   29.82    1.49 
   8   5  -1   30.95    1.28 
   8   5   1   30.24    1.52 
  -8   5  -1   27.46    1.58 
   8  -5  -1   31.60    1.19 
   8   5   1   30.18    1.29 
  -8   5  -1   30.79    1.47 
  -8  -5   1   28.29    1.26 
  -9   5   1    1.37    0.59 
   9  -5   1    0.11    0.35 
  -9   5   1    0.25    0.61 
   9   5  -1    0.69    0.37 
  -9  -5  -1    1.47    0.57 
   9   5  -1    0.24    0.40 
  -9   5  -1    0.89    0.58 
  -9   5  -1    1.05    0.65 
  -9  -5   1    1.45    0.56 
   9  -5  -1    0.73    0.31 
   9   5   1    1.37    0.39 
  10   5  -1    1.39    0.50 
 -10   5   1    0.58    0.66 
  10  -5   1    0.86    0.43 
  10  -5   1    1.32    0.52 
 -10  -5  -1    1.98    0.60 
  10   5   1    0.61    0.64 
  10  -5  -1    0.65    0.50 
 -10   5  -1    1.30    0.72 
 -10   5  -1    1.00    0.67 
 -11   5   1    9.61    1.47 
 -11  -5  -1   10.46    1.14 
  11  -5   1    7.03    1.02 
  11   5  -1    8.34    0.92 
 -11   5   1    7.44    1.21 
  11   5  -1    7.03    1.26 
  11   5   1    5.48    0.98 
  11  -5  -1    7.55    1.17 
 -11   5  -1    9.52    1.42 
  11  -5  -1    6.69    1.01 
  12   5  -1    1.11    0.66 
  12  -5   1    0.88    0.69 
  12  -5  -1    0.72    0.69 
   0  -6   1   26.15    0.94 
   0   6   1   26.46    0.83 
   0  -6  -1   25.60    1.01 
   0   6  -1   25.91    0.96 
   0   6   1   25.29    1.00 
   0  -6  -1   26.03    0.83 
   0   6  -1   26.65    0.83 
   1  -6   1  182.18    5.48 
   1  -6   1  178.30    5.46 
  -1   6   1  179.45    5.66 
  -1   6   1  186.43    5.47 
  -1   6   1  181.96    5.55 
  -1  -6  -1  183.52    5.65 
   1   6  -1  186.22    5.61 
   1   6   1  182.03    5.62 
  -1   6  -1  183.79    5.50 
   1  -6  -1  189.36    5.55 
  -1   6  -1  196.57    5.48 
  -1   6  -1  180.49    5.65 
   1  -6  -1  182.67    5.47 
  -2   6   1   34.83    1.22 
   2   6  -1   34.72    1.34 
  -2   6   1   35.93    1.22 
   2  -6   1   34.53    1.20 
   2  -6   1   36.74    1.14 
  -2   6   1   33.92    1.37 
  -2  -6  -1   33.42    1.33 
  -2   6  -1   36.72    1.15 
   2   6   1   36.28    1.38 
   2  -6  -1   37.63    1.23 
  -2   6  -1   38.63    1.23 
  -2   6  -1   34.79    1.36 
  -2  -6   1   34.48    1.29 
   2  -6  -1   36.17    1.21 
   3   6  -1  299.18    8.56 
  -3  -6  -1  304.03    8.57 
   3  -6   1  290.54    8.71 
  -3  -6  -1  286.22    8.80 
  -3   6   1  283.81    8.86 
   3   6  -1  297.09    8.87 
   3   6   1  293.08    8.87 
  -3  -6   1  294.81    8.56 
   3  -6  -1  292.74    8.66 
  -3   6  -1  283.00    8.85 
  -3  -6   1  286.34    8.75 
   3  -6  -1  293.02    8.71 
   4  -6   1   15.54    0.77 
   4   6  -1   17.23    0.63 
  -4  -6  -1   16.54    0.83 
  -4  -6  -1   17.01    0.66 
  -4   6   1   16.86    0.99 
   4   6  -1   17.06    0.90 
   4  -6  -1   17.02    0.73 
   4   6   1   15.62    0.95 
  -4  -6   1   17.01    0.64 
  -4  -6   1   16.65    0.78 
  -4   6  -1   16.58    0.97 
   4  -6  -1   16.96    0.78 
   5   6  -1   26.09    0.96 
  -5  -6  -1   24.89    1.15 
   5  -6   1   25.31    1.11 
  -5   6   1   26.45    1.34 
   5   6  -1   27.47    1.25 
  -5  -6   1   26.00    1.09 
   5  -6  -1   26.06    1.12 
   5   6   1   27.07    1.31 
  -5  -6   1   27.19    1.06 
   5  -6  -1   27.38    1.03 
  -6   6   1   15.86    1.22 
   6   6  -1   16.45    1.00 
   6  -6   1   16.74    0.90 
  -6  -6  -1   16.86    0.95 
   6   6  -1   16.81    0.77 
  -6  -6   1   17.18    0.87 
   6  -6  -1   16.34    0.89 
  -6   6  -1   15.88    1.19 
   6  -6  -1   17.52    0.94 
   6   6   1   17.52    1.07 
  -7   6   1    0.78    0.59 
  -7  -6  -1    1.23    0.53 
   7  -6   1    0.58    0.34 
   7   6  -1    0.50    0.36 
   7  -6   1    0.85    0.29 
   7  -6   1    0.51    0.22 
   7   6  -1    0.48    0.32 
  -7  -6   1    0.93    0.43 
   7   6   1    0.54    0.45 
   7  -6  -1    0.37    0.33 
  -7   6  -1    0.59    0.57 
  -8   6   1    0.97    0.58 
   8   6  -1    1.02    0.45 
  -8  -6  -1    1.80    0.60 
   8  -6   1    0.33    0.28 
  -8  -6   1    1.34    0.47 
   8  -6  -1    0.55    0.27 
  -8   6  -1    0.21    0.53 
   9  -6   1    3.35    0.45 
   9  -6   1    4.99    0.65 
   9   6  -1    4.25    0.65 
  -9   6   1    3.33    0.79 
   9   6  -1    3.72    0.63 
  -9  -6  -1    5.02    0.78 
   9  -6  -1    3.64    0.57 
  -9   6  -1    3.20    0.74 
  -9  -6   1    5.69    0.84 
   9  -6  -1    5.36    0.62 
   9   6   1    4.06    0.65 
 -10   6   1    4.89    0.92 
  10   6  -1    6.55    0.78 
 -10  -6  -1    5.76    0.95 
 -10   6   1    6.16    1.30 
  10  -6   1    6.53    0.90 
  10  -6  -1    5.22    0.72 
  10  -6  -1    6.00    0.81 
 -10   6  -1    6.36    0.99 
 -10  -6   1    7.26    0.92 
  10   6   1    3.64    0.73 
 -10   6  -1    5.26    0.89 
  11   6  -1    2.81    0.60 
 -11  -6  -1    2.74    0.71 
  11  -6   1    2.11    0.65 
  11   6  -1    0.97    0.65 
 -11   6   1    1.93    0.85 
 -11   6   1    3.87    1.84 
 -11   6  -1    3.19    1.02 
  11   6   1    1.80    0.73 
  11  -6  -1    1.51    0.65 
 -11   6  -1    1.05    0.79 
   0   7   1   12.48    0.47 
   0   7   1   13.53    0.69 
   0  -7   1   14.82    0.64 
   0   7   1   11.62    0.73 
   0   7  -1   11.98    0.64 
   0   7  -1   12.79    0.46 
   0  -7  -1   12.46    0.47 
   1   7  -1  163.34    5.10 
  -1   7   1  163.42    5.16 
  -1   7   1  167.08    4.92 
   1  -7   1  163.84    4.96 
  -1  -7  -1  159.58    5.13 
   1  -7   1  162.24    4.92 
  -1   7   1  165.51    5.03 
  -1   7  -1  166.27    4.99 
  -1   7  -1  175.14    4.93 
   1   7   1  165.76    5.11 
   1  -7  -1  167.03    5.04 
   1  -7  -1  164.92    4.93 
  -1   7  -1  160.87    5.15 
   2   7  -1   79.14    2.62 
  -2  -7  -1   76.26    2.61 
  -2   7   1   75.70    2.64 
  -2   7   1   78.81    2.47 
   2  -7   1   77.20    2.44 
   2  -7   1   81.28    2.43 
  -2   7  -1   76.99    2.40 
  -2   7  -1   75.49    2.63 
   2  -7  -1   78.56    2.46 
   2  -7  -1   80.39    2.48 
   2   7   1   75.58    2.62 
  -3   7   1   61.29    2.23 
   3   7  -1   63.28    2.21 
  -3  -7  -1   62.02    2.15 
   3  -7   1   62.11    2.03 
  -3  -7   1   60.53    2.11 
  -3   7  -1   61.01    2.24 
   3   7   1   61.39    2.22 
   3  -7  -1   62.07    1.99 
   3  -7  -1   60.43    2.03 
  -4  -7  -1   12.33    0.50 
   4  -7   1   10.96    0.64 
  -4  -7  -1   11.35    0.77 
   4   7  -1   11.92    0.47 
   4   7  -1   11.35    0.98 
   4  -7  -1   10.78    0.64 
  -4   7  -1   12.36    1.01 
   4  -7  -1   11.23    0.61 
   4   7   1    9.71    1.37 
  -4  -7   1   10.72    0.69 
  -4  -7   1   11.21    0.48 
  -5   7   1   20.53    1.25 
   5   7  -1   20.53    0.79 
  -5  -7  -1   19.47    0.83 
   5   7  -1   20.90    1.15 
  -5  -7  -1   19.86    1.04 
   5  -7  -1   20.75    0.88 
  -5   7  -1   21.29    1.28 
  -5  -7   1   20.42    0.82 
   5   7   1   21.01    1.18 
  -5  -7   1   20.50    0.99 
   6  -7   1    3.37    0.48 
  -6  -7  -1    4.37    0.72 
   6   7  -1    3.83    0.49 
   6   7  -1    4.17    0.71 
  -6   7   1    3.73    0.68 
  -6  -7   1    4.50    0.62 
   6  -7  -1    3.91    0.63 
   6  -7  -1    4.17    0.60 
  -6   7  -1    5.76    0.99 
   6   7   1    4.40    0.77 
   7   7  -1    8.12    0.63 
   7  -7   1    8.30    0.70 
  -7   7   1    8.07    1.06 
  -7   7  -1    8.09    1.07 
  -7  -7   1    8.77    0.76 
   7  -7  -1    8.18    0.71 
  -8   7   1   44.91    2.21 
  -8  -7  -1   45.00    1.88 
   8   7  -1   45.91    1.73 
  -8   7  -1   47.57    2.19 
   8  -7  -1   48.90    1.62 
  -8  -7   1   45.18    1.82 
  -9   7   1    4.85    1.15 
  -9  -7  -1    6.57    0.86 
   9   7  -1    7.12    0.72 
  -9   7  -1    5.08    1.05 
   9  -7  -1    6.06    0.61 
  10   7  -1    7.97    0.81 
  10   7  -1    4.15    0.74 
 -10   7   1    7.50    1.36 
 -10  -7  -1    8.66    1.13 
  10  -7   1    5.79    0.79 
 -10   7   1    5.28    0.96 
  10  -7  -1    5.97    0.79 
 -10  -7   1    7.49    1.00 
 -10   7  -1    5.85    1.00 
  11  -7   1    2.90    1.37 
  11   7  -1    1.64    0.70 
 -11   7   1    2.34    1.17 
  11   7  -1    2.17    0.59 
 -11   7   1    5.20    1.87 
 -11   7  -1    3.83    1.13 
  11  -7  -1    0.79    1.27 
  11   7   1    1.60    0.75 
 -11   7  -1    4.09    0.96 
   0   8  -1  150.32    4.38 
   0  -8  -1  147.53    4.39 
   0   8  -1  148.11    4.58 
   0   8   1  145.92    4.71 
   0   8   1  147.77    4.62 
   0   8   1  149.56    4.39 
   1   8  -1    1.97    0.33 
  -1   8   1    1.61    0.38 
   1  -8   1    1.63    0.25 
  -1   8   1    2.60    0.36 
  -1   8   1    2.40    0.41 
  -1   8  -1    2.96    0.44 
  -1   8  -1    2.33    0.37 
  -1   8  -1    2.93    0.51 
   1   8   1    2.13    0.33 
   1  -8  -1    2.39    0.27 
   2  -8   1   11.78    0.52 
   2  -8   1   10.56    0.53 
  -2   8   1   10.79    0.80 
   2   8  -1   11.49    0.76 
  -2   8   1   11.15    0.58 
  -2  -8  -1    9.77    0.71 
  -2   8  -1   10.10    0.52 
   2  -8  -1   10.26    0.68 
  -2   8  -1   10.38    0.80 
   2   8   1   11.34    0.77 
   2  -8  -1    9.18    0.52 
   3  -8   1   33.05    1.01 
  -3  -8  -1   28.12    1.28 
   3  -8   1   28.56    1.11 
  -3   8   1   30.15    1.10 
   3   8  -1   30.28    1.37 
  -3  -8   1   28.74    1.24 
   3   8   1   30.17    1.38 
   3  -8  -1   29.92    1.14 
   3  -8  -1   28.87    1.12 
  -4  -8  -1   10.92    0.81 
  -4   8   1   11.71    0.95 
   4   8  -1   10.00    0.87 
   4   8   1   11.05    0.91 
   4  -8  -1   10.07    0.82 
   4  -8  -1    9.49    0.62 
  -4  -8   1    9.75    0.99 
  -4   8  -1   11.36    0.97 
   5  -8   1   66.81    2.29 
  -5  -8  -1   65.41    2.38 
  -5  -8  -1   66.74    2.07 
  -5   8   1   63.64    2.53 
   5   8  -1   65.07    2.50 
   5  -8  -1   67.73    2.30 
  -5   8  -1   64.90    2.53 
   5   8   1   65.80    2.51 
  -5  -8   1   66.54    2.05 
  -5  -8   1   64.17    2.32 
   6   8  -1   39.40    1.31 
   6  -8   1   37.63    1.54 
  -6   8   1   38.37    1.85 
  -6  -8   1   37.92    1.55 
  -6   8  -1   38.42    1.95 
   6  -8  -1   35.44    1.37 
   6  -8  -1   37.78    1.53 
  -7  -8  -1    6.73    0.86 
  -7   8   1    6.81    1.08 
   7   8  -1    7.31    0.57 
   7  -8   1    5.75    0.70 
  -7   8  -1    6.05    1.06 
   7  -8  -1    7.06    0.71 
  -7  -8   1    6.45    0.82 
   8  -8   1    9.73    0.94 
  -8   8   1    9.81    1.29 
  -8  -8  -1    9.94    1.00 
   8   8  -1   10.93    0.76 
   8   8   1    8.57    1.10 
   8  -8  -1    9.42    0.88 
  -8   8  -1    9.90    1.23 
   8  -8  -1   10.98    0.62 
  -9   8   1    3.47    0.86 
   9  -8   1    4.59    0.69 
   9   8  -1    6.42    1.12 
   9   8   1    4.77    0.77 
   9  -8  -1    4.75    0.70 
  -9   8  -1    3.74    0.83 
 -10  -8  -1   11.92    1.20 
  10  -8   1    9.89    1.05 
 -10   8   1   11.12    1.50 
  10   8  -1    8.03    1.28 
 -10  -8   1   11.43    1.12 
  10  -8  -1    7.58    1.09 
 -10   8  -1   13.31    1.61 
 -10   8  -1    9.40    1.49 
  10   8   1    7.49    1.31 
  11  -8   1   -0.10    0.76 
  11   8  -1    0.38    0.74 
 -11   8   1    1.75    1.13 
 -11   8   1    2.01    0.92 
  11   8   1    0.14    0.86 
 -11   8  -1    1.02    0.99 
  11  -8  -1   -0.07    0.69 
 -11   8  -1    0.55    1.81 
   0   9   1   15.87    0.57 
   0   9  -1   16.33    0.83 
   0  -9  -1   15.81    0.57 
   1   9  -1    8.38    0.69 
  -1   9   1    8.09    1.00 
  -1   9   1    8.08    0.63 
  -1   9   1    7.98    0.46 
   1   9   1    8.31    0.72 
  -1   9  -1    8.53    0.46 
   1  -9  -1    8.59    0.44 
   2  -9   1   49.42    1.57 
   2  -9   1   46.24    1.56 
   2   9  -1   46.59    1.81 
  -2   9   1   46.68    1.87 
  -2  -9  -1   45.60    1.82 
  -2   9   1   46.09    1.63 
   2   9   1   46.46    1.85 
   2  -9  -1   46.71    1.57 
  -2   9  -1   46.83    1.89 
  -2   9  -1   45.50    1.57 
   3   9  -1   18.42    1.09 
  -3  -9  -1   15.19    1.16 
   3  -9   1   18.53    0.70 
  -3   9   1   17.90    0.80 
  -3   9   1   18.11    1.12 
   3  -9   1   16.68    0.80 
  -3   9  -1   17.82    1.12 
   3   9   1   17.73    1.10 
   3  -9  -1   18.87    0.96 
  -3   9  -1   18.06    0.71 
   3  -9  -1   16.28    0.80 
   4   9  -1   30.64    1.46 
   4  -9   1   30.73    1.23 
  -4   9   1   32.02    1.55 
  -4  -9   1   28.66    1.33 
  -4   9  -1   29.65    1.49 
   4  -9  -1   28.11    1.22 
   4  -9  -1   29.23    1.17 
   4   9   1   30.56    1.47 
  -5  -9  -1   10.16    0.90 
  -5   9   1   10.38    1.07 
   5  -9   1    8.26    0.73 
   5   9  -1   10.47    0.97 
   5  -9  -1    9.88    0.76 
   5  -9  -1    9.69    0.68 
   5   9   1   10.69    1.02 
  -5   9  -1   10.27    1.04 
  -5  -9   1    9.95    0.87 
   6   9  -1    7.90    0.92 
  -6   9   1    4.36    1.18 
  -6  -9  -1    7.10    0.82 
   6  -9   1    6.78    0.68 
   6  -9  -1    7.07    0.70 
  -6   9  -1    8.95    1.09 
  -6  -9   1    6.71    0.81 
  -7  -9  -1    8.51    0.84 
  -7   9   1    6.85    1.12 
  -7   9  -1    7.68    1.15 
  -7  -9   1    8.48    1.34 
   8   9  -1    1.68    0.64 
  -8  -9  -1    3.45    0.70 
   8  -9   1    2.24    0.55 
  -8  -9   1    2.30    0.66 
   8   9   1    1.81    0.71 
   8  -9  -1    1.93    0.53 
  -8   9  -1    2.42    0.90 
  -9  -9  -1   10.39    1.10 
  -9   9   1   12.05    1.50 
   9   9  -1   11.21    1.28 
   9  -9   1    9.52    1.04 
  -9   9  -1   11.91    1.46 
  -9  -9   1   11.75    1.04 
   9   9   1   11.01    1.38 
   9  -9  -1   10.30    1.05 
  10  -9   1    0.15    0.63 
 -10   9   1    2.92    0.90 
  10   9  -1    1.44    0.69 
  10  -9  -1    1.83    0.70 
 -10   9  -1    2.31    0.90 
  10   9   1    0.25    0.67 
   0  10  -1    7.26    0.67 
   0  10  -1    8.90    0.80 
   0  10   1    7.69    0.78 
  -1  10   1    9.32    0.86 
  -1  10   1    9.58    0.52 
  -1  10   1    9.24    0.70 
   1  10  -1    9.90    0.77 
   1  10   1   10.20    0.86 
  -1  10  -1   10.34    0.85 
   1 -10  -1    9.57    0.49 
  -1  10  -1    9.68    0.51 
  -2  10   1   31.35    1.27 
  -2  10   1   31.20    1.52 
   2  10  -1   31.12    2.02 
   2 -10   1   37.28    1.45 
   2 -10  -1   31.11    1.16 
   2  10   1   32.29    1.50 
  -2  10  -1   31.64    1.50 
  -2  10  -1   31.62    1.19 
  -3  10   1   12.69    0.72 
   3  10  -1   11.87    0.95 
  -3  10   1   12.61    0.98 
  -3 -10  -1   10.78    0.90 
   3 -10   1   11.25    0.68 
   3  10   1   11.56    0.95 
  -3  10  -1   13.31    0.62 
  -3  10  -1   11.93    1.00 
   3 -10  -1   12.04    0.69 
   4 -10   1   43.36    1.66 
  -4  10   1   41.06    2.54 
  -4 -10  -1   44.90    1.87 
   4  10  -1   44.24    1.91 
   4 -10  -1   51.72    1.77 
  -4  10  -1   44.88    1.99 
   4 -10  -1   43.04    1.65 
   4  10   1   44.92    1.94 
  -5 -10  -1   10.63    0.87 
   5  10  -1   11.09    1.00 
   5 -10   1   11.56    0.78 
  -5  10  -1   11.67    1.55 
  -5 -10   1   11.79    0.94 
   5 -10  -1    9.86    0.74 
   5  10   1   10.69    1.01 
   6 -10   1    6.05    0.69 
   6  10  -1    8.49    0.99 
  -6 -10  -1    7.94    0.87 
   6 -10  -1    6.12    0.69 
  -6  10  -1    6.16    0.87 
  -6 -10   1    8.66    0.91 
   6  10   1    7.15    1.02 
   7  10  -1   -0.12    0.47 
  -7 -10  -1    0.35    0.55 
  -7  10   1    0.62    0.63 
   7  10   1   -0.40    0.46 
  -7  10  -1   -0.18    0.59 
  -7 -10   1    0.24    0.92 
   8  10  -1    1.75    0.60 
  -8  10   1    2.09    0.81 
   8 -10   1    1.89    0.66 
  -8 -10  -1    3.60    0.74 
  -8 -10   1    2.52    0.87 
  -8  10  -1    2.68    0.78 
   8  10   1    1.41    0.60 
   8 -10  -1    2.53    0.67 
   9  10  -1    2.29    0.69 
  -9  10   1    2.01    0.88 
   9 -10   1    2.30    0.69 
   9  10   1    1.48    0.69 
  -9 -10   1    2.24    0.68 
   9 -10  -1    2.63    0.74 
  -9  10  -1    2.03    0.90 
  10 -10   1    0.22    0.75 
 -10  10   1    1.26    1.06 
  10  10  -1    0.31    0.70 
 -10 -10  -1    0.56    1.06 
  10  10   1    1.99    0.86 
  10 -10  -1    1.39    0.81 
   0  11  -1    1.08    0.43 
   0  11   1    1.26    0.40 
   0  11  -1    1.22    0.35 
   0  11   1    1.10    0.41 
  -1  11   1    1.34    0.28 
  -1  11   1    0.87    0.44 
   1  11  -1    1.36    0.42 
  -1  11   1    1.35    0.35 
   1  11   1    1.54    0.48 
  -1  11  -1    0.99    0.43 
  -1  11  -1    1.31    0.28 
   1 -11  -1    1.42    0.24 
  -1  11  -1    1.81    0.36 
  -2  11   1   14.73    0.84 
   2  11  -1   16.27    1.03 
   2 -11  -1   13.93    0.71 
  -2  11  -1   14.33    0.76 
   2  11   1   14.70    1.09 
  -2  11  -1   14.70    1.07 
  -3  11   1    3.86    0.56 
   3 -11   1    4.37    0.63 
   3  11  -1    4.11    0.74 
   3 -11   1    3.84    0.55 
  -3  11  -1    3.80    0.48 
   3 -11  -1    2.96    0.60 
  -3  11  -1    3.29    0.61 
   3  11   1    3.74    0.55 
  -4 -11  -1    7.86    0.82 
   4  11  -1    8.22    0.89 
   4  11   1    8.01    0.93 
  -4  11  -1    8.23    0.96 
   5 -11   1    2.54    0.46 
  -5 -11  -1    4.06    0.75 
   5  11  -1    3.43    0.57 
  -5  11  -1    3.49    0.70 
   5  11   1    3.34    0.60 
   5 -11  -1    4.11    0.51 
   6 -11   1    0.90    0.42 
   6  11  -1    0.14    0.46 
  -6  11   1    1.37    0.66 
  -6 -11  -1    0.73    0.54 
   6  11   1    0.69    0.49 
  -6 -11   1    0.35    0.56 
  -6  11  -1    0.74    0.64 
   6 -11  -1    1.72    0.45 
  -7  11   1    1.92    0.74 
   7 -11   1    1.02    0.48 
  -7 -11  -1    3.05    0.72 
   7  11  -1    1.73    0.58 
   7 -11  -1    1.64    0.50 
  -7  11  -1    0.72    0.78 
   7  11   1    1.06    0.57 
  -7 -11   1    2.25    0.65 
   8  11  -1    1.20    0.58 
   8 -11   1    1.51    0.70 
  -8  11   1    1.48    0.84 
   8 -11  -1    1.80    0.68 
  -8 -11   1    3.02    0.71 
   8  11   1    1.74    0.65 
  -8  11  -1    2.35    0.82 
   9  11  -1    0.90    0.70 
  -9 -11  -1    1.09    0.78 
   9 -11   1    0.84    0.64 
  -9  11   1    0.24    0.87 
   9  11   1    0.78    0.71 
  -9  11  -1   -0.19    0.75 
  -9 -11   1    2.62    0.77 
   9 -11  -1    1.55    0.68 
   0  12  -1   12.18    0.94 
   0  12  -1   13.05    1.02 
  -1  12   1    4.62    0.69 
   1  12  -1    4.10    0.58 
  -1  12  -1    5.31    0.80 
   1  12   1    4.09    0.73 
  -1  12  -1    4.60    0.66 
   2  12  -1   15.73    1.06 
  -2  12   1   15.58    0.91 
   2 -12  -1   14.36    0.75 
  -2  12  -1   15.67    0.87 
   2  12   1   15.57    1.06 
  -2  12  -1   17.54    1.19 
  -3  12   1   10.74    0.75 
   3  12  -1    9.45    0.96 
   3  12   1   11.27    1.07 
  -3  12  -1    9.47    0.66 
   3 -12  -1    9.24    0.69 
  -3  12  -1   10.74    1.09 
   4  12  -1    1.25    0.47 
   4 -12   1    0.79    0.43 
   4  12   1    1.58    0.49 
  -4  12  -1    0.54    1.11 
   4 -12  -1    1.24    0.45 
   5  12  -1    3.64    0.68 
  -5 -12  -1    3.97    0.76 
   5 -12   1    2.99    0.49 
  -5  12   1    3.31    0.77 
   5 -12  -1    4.01    0.64 
  -5  12  -1    2.72    0.75 
   5  12   1    2.24    0.59 
   6  12  -1    0.46    0.79 
  -6  12   1    0.53    0.71 
   6 -12   1    1.00    0.51 
  -6  12  -1    0.23    0.80 
   6  12   1    1.62    0.67 
   6 -12  -1    0.71    0.51 
   7 -12   1    2.21    0.57 
  -7  12   1    3.00    0.88 
   7  12  -1    2.34    0.62 
   7  12   1    2.73    0.72 
  -7  12  -1    3.44    0.95 
   7 -12  -1    3.38    0.61 
  -8  12   1    0.52    0.83 
  -8 -12  -1    1.24    0.80 
   8 -12   1    0.77    0.62 
   8  12  -1    0.73    0.64 
   8 -12  -1    0.14    0.58 
  -8  12  -1   -0.28    0.79 
   8  12   1    0.52    0.65 
   9 -12   1   -0.21    0.66 
  -9 -12  -1    1.74    0.91 
   9  12  -1    0.04    0.67 
  -9  12   1    0.52    0.96 
  -9  12  -1   -0.31    0.97 
   9 -12  -1   -0.01    0.67 
   0  13  -1    0.49    0.72 
   0  13   1    0.93    0.40 
   1  13  -1    2.37    0.47 
  -1  13  -1    1.53    0.56 
  -1  13  -1    2.32    0.43 
   2  13  -1   40.30    1.79 
  -2  13   1   41.62    1.65 
  -2  13  -1   40.82    1.56 
   2 -13  -1   38.15    1.43 
  -2  13  -1   41.29    2.10 
   2  13   1   39.86    1.84 
  -3  13   1    2.52    0.45 
   3  13  -1    2.55    0.56 
   3  13   1    1.48    0.50 
  -3  13  -1    2.42    0.68 
  -3  13  -1    3.71    0.60 
   3 -13  -1    3.24    0.45 
   4  13  -1    2.97    0.65 
   4  13   1    2.27    0.56 
  -4  13  -1    1.99    0.80 
   4 -13  -1    2.28    0.58 
  -5  13   1    0.63    0.73 
   5  13  -1    1.69    0.66 
   5 -13  -1    1.18    0.45 
  -5  13  -1    0.45    0.71 
  -6  13   1   -0.03    0.75 
  -6 -13  -1    1.76    0.77 
   6  13  -1   -0.03    0.54 
  -6  13  -1    0.00    0.77 
   6  13   1    0.84    0.59 
  -7  13   1   -0.17    0.87 
   7 -13   1    0.39    0.64 
  -7 -13  -1   -0.56    0.75 
   7  13  -1   -0.23    0.59 
   7  13   1    0.08    0.67 
  -7  13  -1   -0.93    0.81 
   7 -13  -1    1.14    0.74 
   8 -13   1   -0.06    0.65 
  -8  13   1   -0.85    1.02 
   8  13  -1    0.04    0.93 
   8 -13  -1    0.54    0.65 
   8  13   1   -0.16    0.85 
   0  14  -1    0.77    0.40 
   0  14   1    1.10    0.38 
   0  14  -1    0.67    0.57 
   1  14  -1    0.78    0.65 
   1  14  -1    1.48    0.43 
  -1  14   1    1.10    0.46 
  -1  14  -1    0.91    0.48 
  -1  14  -1    0.92    0.62 
   1  14   1    0.73    0.42 
  -2  14   1    8.33    1.09 
   2  14  -1    8.09    0.98 
   2  14   1    9.86    1.07 
  -2  14  -1    9.08    0.80 
  -3  14   1   16.81    1.44 
  -3  14   1   15.60    0.99 
   3  14  -1   15.58    1.24 
  -3  14  -1   17.50    1.65 
   3 -14  -1   14.76    0.89 
   3  14   1   15.31    1.27 
   4  14  -1    0.84    0.52 
  -4  14   1   -0.15    0.71 
   4  14   1    1.03    0.63 
  -4  14  -1   -0.14    0.71 
   4 -14  -1    1.73    0.46 
  -5  14   1   -0.08    0.76 
   5  14  -1   -0.55    0.56 
   5  14   1    0.17    0.56 
  -5  14  -1   -0.62    0.78 
   5 -14  -1    0.89    0.44 
   6  14  -1   -1.08    0.55 
   6  14   1   -0.29    0.61 
  -6  14  -1   -0.09    1.01 
   6 -14  -1   -0.52    0.50 
   7  14  -1    2.29    0.82 
  -7  14   1    0.00    1.81 
   7  14   1    1.91    1.18 
   7 -14  -1    1.88    0.64 
   0  15   1    1.23    0.46 
   0  15  -1    2.00    0.72 
   0  15   1    2.08    0.77 
   0  15  -1    2.08    0.47 
  -1  15   1    2.95    0.80 
  -1  15   1    2.04    0.48 
  -1  15  -1    1.94    0.73 
   1  15   1    2.18    0.53 
   1  15   1    2.93    0.81 
  -1  15  -1    2.46    0.52 
  -2  15   1    2.43    0.55 
   2  15  -1    2.31    0.71 
  -2  15   1    1.71    0.76 
   2  15  -1    2.08    0.52 
   2  15   1    2.41    0.69 
  -2  15  -1    1.83    0.47 
  -2  15  -1    2.77    0.76 
  -3  15   1   -0.28    0.65 
   3  15  -1    1.28    0.54 
  -3  15   1    1.43    0.78 
  -3  15  -1    1.18    0.76 
   3  15   1    0.84    0.62 
   4  15  -1    2.73    0.66 
  -4  15   1    0.28    0.83 
   4  15   1    0.94    0.87 
  -4  15  -1    2.01    0.89 
  -5  15   1    0.44    0.92 
   5  15  -1    1.29    0.65 
   5 -15  -1    1.07    0.53 
  -5  15  -1    0.11    0.92 
   5  15   1    0.27    0.65 
  -6  15   1   -1.93    1.06 
   6  15  -1   -0.19    0.65 
   6  15   1   -1.38    0.69 
   6 -15  -1   -0.06    0.54 
  -6  15  -1    0.32    1.84 
   0  16   1    1.51    0.54 
   0  16  -1    1.10    0.51 
   0  16   1    3.27    0.89 
   0  16  -1    3.10    0.87 
   1  16  -1    0.34    0.74 
   1  16  -1    1.27    0.52 
  -1  16   1    0.45    0.49 
   1  16   1    1.61    0.82 
  -1  16  -1    0.45    0.46 
   1  16   1    0.55    0.53 
  -1  16  -1    0.70    0.81 
   2  16  -1    3.66    0.93 
  -2  16   1    4.00    0.61 
   2  16  -1    3.14    0.65 
  -2  16   1    4.62    1.02 
   2  16   1    3.88    0.93 
  -2  16  -1    3.40    0.94 
   2  16   1    3.46    0.90 
   3  16  -1    0.53    0.57 
  -3  16   1    0.71    0.89 
  -3  16  -1    0.27    0.87 
   3  16   1    2.53    0.82 
   4  16  -1    2.85    0.72 
   4  16   1    2.62    0.74 
  -5  16   1    0.14    1.00 
   5  16  -1    0.66    0.68 
  -5  16  -1   -0.58    1.00 
   5  16   1    1.09    0.75 
   0  17   1    0.96    0.96 
   0  17  -1   -0.28    0.51 
   1  17  -1    2.35    0.62 
  -1  17   1    1.72    0.56 
   1  17  -1    1.19    1.63 
  -1  17   1    1.49    1.62 
   1  17   1    3.25    1.89 
   2  17  -1    0.75    0.92 
  -2  17   1    0.82    1.04 
  -2  17  -1   -1.17    1.02 
   2  17   1    0.96    1.02 
   2  17   1   -0.72    0.60 
  -3  17   1   -0.33    0.94 
   3  17  -1   -0.13    0.63 
   3  17  -1   -0.10    0.85 
   3  17   1    0.92    0.94 
   3  17   1   -0.20    0.64 
  -3  17  -1   -0.01    1.00 
  -1   0   2   89.87    2.68 
   1   0  -2   90.44    2.72 
   1   0  -2   93.55    2.74 
  -1   0  -2   90.13    2.72 
  -1   0  -2   83.84    2.75 
  -1   0   2   94.34    2.72 
   1   0   2   91.84    2.75 
   1   0   2   90.81    2.70 
  -1   0  -2   88.95    2.69 
  -2   0  -2  248.26    7.52 
  -2   0   2  262.12    7.51 
   2   0  -2  243.07    7.50 
   2   0   2  245.54    7.51 
  -2   0  -2  262.76    7.51 
   2   0   2  258.51    7.52 
   2   0  -2  266.67    7.56 
  -2   0   2  240.46    7.55 
   2   0   2  263.24    7.55 
  -2   0  -2  255.79    7.51 
  -2   0  -2  250.08    7.55 
  -3   0   2   40.03    1.31 
   3   0   2   42.49    1.39 
   3   0   2   39.48    1.38 
  -3   0  -2   39.44    1.37 
   3   0   2   39.02    1.32 
  -3   0   2   37.57    1.38 
   3   0  -2   41.87    1.42 
   3   0   2   39.48    1.36 
  -3   0  -2   38.60    1.29 
  -3   0  -2   38.90    1.31 
  -3   0  -2   39.65    1.36 
  -4   0  -2   69.78    2.29 
   4   0   2   71.81    2.25 
   4   0   2   69.36    2.25 
  -4   0   2   69.59    2.17 
  -4   0   2   74.60    2.62 
   4   0  -2   67.03    2.22 
  -4   0  -2   71.28    2.30 
  -4   0  -2   66.81    2.20 
   5   0  -2  151.96    4.63 
  -5   0   2  151.05    4.57 
  -5   0  -2  151.17    4.69 
  -5   0  -2  148.81    4.71 
  -5   0   2  149.60    4.75 
   5   0   2  155.49    4.64 
   5   0   2  145.78    4.64 
  -6   0   2    4.37    0.70 
   6   0   2    5.27    0.52 
   6   0   2    5.49    0.52 
  -6   0  -2    4.71    0.65 
  -6   0  -2    4.68    0.60 
  -6   0   2    5.51    0.48 
   6   0  -2    4.16    0.44 
   6   0  -2    4.98    0.51 
   7   0  -2   53.50    1.90 
  -7   0   2   53.25    1.84 
  -7   0  -2   51.73    1.99 
  -7   0  -2   50.25    2.03 
   7   0  -2   51.87    1.88 
  -7   0   2   51.26    2.06 
   7   0   2   53.55    1.90 
   7   0   2   51.24    1.91 
  -8   0  -2    2.48    0.65 
  -8   0   2    2.01    0.56 
   8   0   2    2.24    0.48 
  -8   0   2    3.23    0.53 
  -8   0  -2    1.30    0.49 
   8   0  -2    2.56    0.44 
   8   0  -2    2.37    0.39 
   8   0   2    2.43    0.42 
  -9   0  -2   12.02    0.97 
  -9   0  -2   14.45    1.07 
   9   0   2   12.66    0.97 
  -9   0   2   12.33    0.89 
   9   0  -2   11.82    0.85 
   9   0   2   12.83    0.86 
   9   0  -2   13.52    0.86 
  10   0  -2    7.48    0.83 
  10   0   2    8.74    0.84 
 -10   0   2    8.53    1.38 
 -10   0  -2    8.63    1.40 
  10   0  -2   10.11    0.88 
 -10   0  -2    7.78    1.08 
  10   0   2    8.35    0.94 
  11   0   2    3.23    0.64 
 -11   0   2    3.01    0.71 
  11   0  -2    2.52    0.61 
 -11   0  -2    3.58    0.81 
 -11   0   2    3.71    0.77 
  11   0  -2    1.94    0.56 
  12   0  -2    2.29    0.66 
  12   0   2    1.00    0.66 
 -12   0  -2    4.76    1.01 
 -12   0  -2    2.69    1.00 
  12   0  -2    2.20    0.63 
  12   0   2    1.29    0.65 
   0   1   2  183.23    5.43 
   0  -1  -2  184.07    5.41 
  -1   1   2  148.64    4.37 
  -1  -1  -2  151.46    4.40 
  -1   1   2  151.65    4.38 
   1  -1   2  133.54    4.34 
   1   1  -2  143.71    4.36 
  -1   1   2  139.79    4.41 
   1  -1   2  145.28    4.36 
   1   1  -2  141.86    4.40 
   1  -1  -2  153.62    4.49 
   1  -1  -2  147.60    4.37 
   1  -1  -2  147.92    4.38 
  -1   1  -2  145.19    4.36 
   1   1   2  156.01    4.42 
  -1  -1   2  154.24    4.37 
   1   1   2  147.18    4.40 
  -1   1  -2  151.24    4.35 
   2  -1   2  213.98    6.41 
   2  -1   2  206.89    6.36 
  -2  -1  -2  212.07    6.45 
  -2  -1  -2  231.78    6.40 
   2  -1   2  218.93    6.42 
  -2   1   2  231.19    6.41 
   2   1  -2  214.51    6.39 
   2   1  -2  223.37    6.45 
  -2   1   2  208.63    6.45 
  -2  -1  -2  218.31    6.43 
   2   1   2  220.00    6.42 
   2   1   2  218.93    6.45 
   2  -1  -2  225.58    6.46 
  -2   1  -2  202.02    6.44 
  -2   1  -2  207.85    6.36 
  -2   1  -2  205.56    6.41 
  -2   1  -2  232.15    6.41 
   2   1   2  204.40    6.43 
   2  -1  -2  210.29    6.41 
  -2  -1   2  200.97    6.44 
  -2  -1   2  231.42    6.39 
  -3  -1  -2   91.61    2.68 
   3  -1   2   86.32    2.69 
  -3  -1  -2   83.87    2.69 
  -3   1   2   90.36    2.70 
  -3  -1  -2   86.81    2.73 
  -3   1   2   83.85    2.76 
   3  -1   2   92.96    2.74 
   3   1  -2   86.10    2.67 
  -3  -1  -2   88.46    2.72 
   3   1  -2   89.31    2.77 
   3  -1   2   85.28    2.65 
   3  -1  -2   87.70    2.77 
   3   1   2   88.80    2.73 
  -3   1  -2   83.04    2.72 
  -3  -1   2   88.27    2.67 
   3   1   2   84.94    2.72 
  -3  -1   2   84.90    2.75 
   3   1   2   89.11    2.73 
  -3   1  -2   88.52    2.69 
  -3   1  -2   82.84    2.73 
  -3   1  -2   80.42    2.62 
  -3  -1   2   87.36    2.61 
   3   1   2   84.89    2.67 
  -4   1   2   40.90    1.71 
   4  -1   2   36.96    1.29 
  -4  -1  -2   37.92    1.34 
   4  -1   2   36.84    1.26 
  -4  -1  -2   37.37    1.34 
   4   1  -2   37.30    1.26 
   4  -1  -2   36.52    1.28 
  -4  -1   2   36.58    1.44 
  -4   1  -2   32.81    1.20 
   4   1   2   35.73    1.26 
  -4  -1   2   38.12    1.21 
  -4   1  -2   36.76    1.36 
   4   1   2   36.15    1.32 
  -4   1  -2   36.62    1.34 
  -5   1   2  139.13    4.47 
   5  -1   2  140.61    4.36 
   5   1  -2  132.46    4.36 
   5   1  -2  141.66    4.34 
  -5  -1  -2  143.21    4.41 
   5  -1   2  137.62    4.32 
  -5  -1  -2  139.51    4.42 
   5   1   2  145.49    4.35 
  -5  -1   2  143.05    4.27 
  -5  -1   2  142.60    4.47 
   5   1   2  143.03    4.41 
  -5   1  -2  140.63    4.44 
  -5   1  -2  138.95    4.41 
   5  -1  -2  144.74    4.37 
  -6   1   2   13.46    0.68 
  -6   1   2   13.38    0.93 
   6  -1   2   13.63    0.76 
  -6  -1  -2   13.05    0.86 
   6   1  -2   13.60    0.71 
  -6  -1  -2   13.96    0.80 
   6  -1   2   13.44    0.70 
   6   1  -2   13.12    0.71 
  -6   1  -2   12.74    0.81 
  -6  -1   2   13.61    0.67 
   6  -1  -2   12.67    0.75 
  -6  -1   2   13.51    0.93 
  -6   1  -2   12.16    0.89 
   6   1   2   12.55    0.70 
   6   1   2   12.98    0.78 
  -7  -1  -2    5.62    0.70 
   7   1  -2    6.00    0.59 
   7  -1   2    5.13    0.58 
  -7  -1  -2    4.77    0.77 
   7  -1   2    5.88    0.59 
  -7   1   2    4.64    0.65 
  -7   1   2    5.70    0.58 
  -7  -1   2    6.04    0.58 
   7   1   2    6.50    0.69 
  -7   1  -2    6.45    0.77 
   7   1   2    6.22    0.56 
  -7   1  -2    4.88    0.81 
   7  -1  -2    5.23    0.57 
  -7  -1   2    4.68    0.77 
   7  -1  -2    5.85    0.51 
   8   1  -2   10.56    0.74 
   8   1  -2   12.22    0.79 
  -8   1   2   11.35    0.80 
  -8  -1  -2   10.07    1.07 
  -8   1   2   10.07    1.04 
   8  -1   2   11.26    0.75 
  -8  -1  -2    9.93    0.94 
   8  -1   2   11.43    0.83 
  -8  -1   2   10.48    0.74 
  -8  -1   2   11.71    1.15 
  -8   1  -2   10.27    0.90 
  -8   1  -2    9.31    0.95 
   8  -1  -2   10.88    0.76 
   8   1   2   10.59    0.91 
   8   1   2   10.69    0.74 
   8  -1  -2   11.19    0.78 
   9  -1   2    0.35    0.41 
  -9   1   2    0.70    0.55 
   9   1  -2    0.12    0.35 
  -9  -1  -2    1.09    0.48 
   9  -1   2    0.05    0.35 
   9   1  -2    0.57    0.31 
  -9  -1  -2    0.68    0.56 
   9  -1  -2    0.38    0.28 
  -9   1  -2    1.28    0.54 
  -9  -1   2    0.27    0.47 
  -9   1  -2    0.37    0.45 
   9   1   2    0.40    0.36 
   9  -1  -2    0.95    0.39 
   9   1   2    0.42    0.37 
  10   1  -2    1.92    0.48 
 -10   1   2    1.96    0.97 
  10  -1   2    1.33    0.48 
 -10   1   2    1.81    0.67 
 -10  -1  -2    2.94    0.69 
 -10  -1  -2    2.08    0.68 
  10   1   2    2.43    0.52 
  10  -1  -2    2.18    0.51 
 -10  -1   2    2.42    0.66 
  10   1   2    1.56    0.48 
 -10   1  -2    2.03    0.61 
 -10   1  -2    2.97    0.73 
  10  -1  -2    2.40    0.51 
 -11   1   2   12.16    1.34 
  11  -1   2   10.44    1.05 
  11   1  -2    9.54    1.06 
 -11   1   2    9.22    0.99 
  11  -1   2    9.21    0.98 
 -11  -1   2   10.50    1.00 
 -11   1  -2    9.34    1.33 
  11   1   2   10.60    1.58 
  11  -1  -2    7.80    0.98 
 -11   1  -2   12.13    1.36 
  12   1  -2    0.28    0.60 
  12  -1   2    0.70    0.62 
 -12  -1  -2   -0.15    0.80 
  12   1  -2    1.71    0.63 
  12  -1  -2    2.15    0.64 
  12   1   2    1.72    0.77 
  12   1   2    0.02    0.58 
   0   2   2  276.56    8.38 
   0   2   2  273.23    8.40 
   0   2   2  295.36    8.41 
   0  -2  -2  297.06    8.41 
   0  -2  -2  281.12    8.35 
   2   2  -2  111.03    3.48 
   2   2  -2  115.14    3.55 
  -2  -2  -2  110.21    3.55 
   2  -2   2  119.23    3.53 
   2  -2   2  115.06    3.50 
   2   2  -2  119.75    3.44 
  -2   2   2  119.42    3.51 
  -2  -2  -2  118.91    3.47 
  -2   2   2  117.36    3.57 
  -2  -2  -2  118.99    3.56 
   2   2   2  121.79    3.56 
  -2   2  -2  111.16    3.53 
   2   2   2  113.04    3.55 
   2  -2  -2  112.41    3.50 
  -2   2  -2  116.17    3.50 
   2  -2  -2  118.15    3.56 
  -2  -2   2  120.40    3.47 
  -2  -2   2  111.24    3.43 
  -3   2   2    6.62    0.60 
  -3  -2  -2    6.21    0.43 
   3  -2   2    6.48    0.32 
   3   2  -2    6.79    0.35 
   3  -2   2    6.87    0.49 
   3  -2   2    6.12    0.37 
   3   2  -2    7.16    0.33 
  -3  -2  -2    6.91    0.36 
  -3  -2  -2    7.17    0.47 
  -3   2  -2    7.08    0.50 
   3   2   2    8.07    0.68 
   3   2   2    7.87    0.49 
   3   2   2    7.38    0.49 
  -3  -2   2    7.78    0.37 
  -3  -2   2    7.34    0.32 
  -4   2   2   68.98    2.35 
  -4  -2  -2   69.42    2.27 
   4  -2   2   67.38    2.22 
   4  -2   2   66.52    2.14 
   4   2  -2   70.55    2.12 
   4   2  -2   65.87    2.17 
   4   2  -2   64.54    2.23 
   4  -2  -2   69.55    2.22 
  -4   2  -2   67.88    2.29 
   4   2   2   69.17    2.28 
  -4  -2   2   69.96    2.31 
  -4  -2   2   69.75    2.12 
  -4   2  -2   69.97    2.29 
   4   2   2   71.67    2.19 
   5  -2   2   35.98    1.33 
  -5  -2  -2   37.20    1.40 
   5  -2   2   35.61    1.26 
  -5   2   2   36.02    1.50 
  -5  -2  -2   35.90    1.42 
   5   2  -2   33.11    1.34 
   5   2  -2   36.68    1.29 
  -5  -2   2   36.89    1.47 
   5  -2  -2   36.79    1.34 
  -5   2  -2   36.49    1.45 
  -5  -2   2   36.92    1.24 
  -5   2  -2   36.25    1.40 
   5   2   2   36.66    1.41 
   5   2   2   37.95    1.31 
   6  -2   2  114.26    3.66 
  -6   2   2  108.13    4.01 
  -6  -2  -2  118.12    3.78 
   6   2  -2  119.48    3.78 
   6   2  -2  118.77    3.70 
   6  -2   2  121.32    3.99 
  -6  -2  -2  116.36    3.83 
  -6   2  -2  117.95    3.80 
  -6  -2   2  118.19    3.63 
  -6  -2   2  108.85    3.97 
   6   2   2  123.34    3.71 
   6  -2  -2  118.94    3.87 
   6   2   2  121.56    3.82 
  -6   2  -2  116.50    3.85 
   7   2  -2    5.93    0.60 
  -7  -2  -2    4.43    0.77 
   7  -2   2    5.29    0.58 
  -7  -2  -2    5.56    0.70 
   7  -2   2    4.80    0.54 
  -7   2   2    5.17    0.87 
  -7   2   2    3.64    0.57 
   7  -2  -2    3.74    0.48 
  -7   2  -2    3.80    0.62 
  -7  -2   2    5.61    0.54 
  -7   2  -2    4.98    0.82 
  -7  -2   2    4.84    0.73 
   7   2   2    4.83    0.89 
   7  -2  -2    5.96    0.51 
  -8  -2  -2   45.22    1.92 
   8   2  -2   45.57    1.78 
  -8   2   2   43.51    2.29 
   8   2  -2   44.74    1.69 
  -8   2   2   44.56    1.72 
   8  -2   2   42.79    1.70 
  -8  -2  -2   42.12    1.98 
   8  -2   2   43.92    1.73 
  -8   2  -2   44.91    1.84 
   8   2   2   46.58    1.73 
   8  -2  -2   43.80    1.74 
   8   2   2   45.96    1.85 
   8  -2  -2   46.11    1.84 
  -8   2  -2   43.99    1.92 
  -8  -2   2   45.27    1.64 
   9  -2   2    1.53    0.43 
   9  -2   2    1.39    0.43 
  -9  -2  -2    1.22    0.57 
   9   2  -2    1.50    0.38 
  -9   2  -2    1.49    0.57 
   9   2   2    1.73    0.49 
  -9  -2   2    2.32    0.51 
   9   2   2    0.42    0.39 
   9  -2  -2    0.74    0.38 
   9  -2  -2    1.29    0.34 
  -9   2  -2    1.14    0.53 
 -10   2   2   21.52    1.42 
  10   2  -2   24.93    1.22 
  10  -2   2   23.16    1.48 
  10  -2   2   19.77    1.54 
 -10  -2  -2   24.12    1.35 
  10   2   2   22.86    1.21 
  10  -2  -2   22.21    1.45 
 -10   2  -2   23.29    1.38 
  10  -2  -2   25.59    1.23 
 -10  -2   2   22.93    1.21 
 -10   2  -2   24.75    1.52 
 -11   2   2    1.91    0.68 
  11  -2   2    0.38    0.47 
  11  -2   2    0.64    0.55 
  11   2  -2    0.19    0.49 
 -11   2   2    0.51    0.65 
  11  -2  -2    0.12    0.53 
  11   2   2    0.87    0.78 
 -11  -2   2    1.07    0.76 
  11   2   2    0.47    0.53 
 -11   2  -2   -0.46    0.74 
 -11   2  -2    0.82    0.64 
  12   2  -2    3.34    0.74 
  12  -2   2    4.22    0.97 
  12   2  -2    2.93    0.69 
 -12  -2  -2    5.43    0.98 
 -12   2  -2    4.72    1.09 
  12  -2  -2    4.33    0.67 
  12  -2  -2    4.76    1.14 
  12   2   2    3.48    0.82 
   0  -3  -2   36.61    1.11 
   0   3   2   34.19    1.19 
   0   3  -2   32.15    1.12 
   0   3   2   37.55    1.21 
   0  -3  -2   36.72    1.20 
   0   3   2   36.94    1.11 
  -1   3   2  365.26   11.00 
  -1  -3  -2  372.42   11.04 
  -1   3   2  401.42   10.97 
  -1   3   2  364.80   11.03 
  -1  -3  -2  390.42   11.04 
   1   3  -2  377.57   10.97 
   1  -3   2  382.61   11.05 
   1   3  -2  317.17   10.98 
  -1   3   2  396.70   11.04 
   1   3  -2  378.15   10.93 
   1  -3  -2  376.27   11.04 
   1   3   2  387.86   11.05 
   1  -3  -2  360.40   10.96 
   1   3   2  365.84   11.04 
  -1   3  -2  335.99   10.90 
  -1   3  -2  353.24   11.01 
   1  -3  -2  384.64   11.03 
   1  -3  -2  384.83   11.01 
  -1   3  -2  397.32   10.97 
  -2  -3  -2  143.92    4.52 
  -2   3   2  144.92    4.45 
   2  -3   2  149.64    4.50 
  -2  -3  -2  148.20    4.41 
   2   3  -2  149.48    4.42 
   2   3  -2  141.72    4.40 
  -2   3   2  141.94    4.53 
   2  -3   2  139.77    4.45 
  -2  -3  -2  147.74    4.53 
  -2  -3   2  147.01    4.42 
   2  -3  -2  147.25    4.46 
   2  -3  -2  155.01    4.48 
   2   3   2  151.16    4.54 
   2  -3  -2  151.99    4.53 
  -2   3  -2  148.49    4.51 
  -2  -3   2  156.23    4.41 
  -2   3  -2  157.67    4.47 
   2   3   2  151.29    4.52 
   3   3  -2  305.43    9.13 
   3  -3   2  331.64    9.34 
  -3   3   2  309.60    9.28 
  -3  -3  -2  305.32    9.25 
   3   3  -2  313.36    9.12 
  -3  -3  -2  324.51    9.14 
   3   3  -2  274.25    9.22 
   3  -3   2  298.76    9.19 
  -3  -3   2  298.39    9.12 
  -3   3  -2  294.98    9.24 
   3   3   2  306.34    9.27 
   3   3   2  343.39    9.38 
   3  -3  -2  308.92    9.20 
  -3  -3   2  323.46    9.14 
  -4  -3  -2   49.69    1.71 
   4   3  -2   47.85    1.59 
   4  -3   2   48.12    1.53 
   4  -3   2   46.71    1.65 
   4   3  -2   41.73    1.66 
   4   3  -2   51.41    1.57 
  -4  -3  -2   54.00    1.70 
  -4   3   2   48.98    1.80 
   4   3   2   48.64    1.74 
   4  -3  -2   47.35    1.65 
  -4   3  -2   49.33    1.75 
  -4  -3   2   49.08    1.56 
  -4  -3   2   52.06    1.62 
   5   3  -2   78.37    2.66 
  -5  -3  -2   79.89    2.66 
  -5   3   2   82.21    2.79 
   5  -3   2   78.43    2.49 
   5  -3   2   82.19    2.63 
   5   3  -2   83.30    2.52 
   5   3  -2   80.66    2.55 
   5   3   2   81.12    2.56 
   5  -3  -2   77.35    2.61 
   5   3   2   80.92    2.71 
  -5  -3   2   80.37    2.51 
  -5   3  -2   79.34    2.73 
   6   3  -2    0.18    0.23 
   6  -3   2    0.57    0.20 
  -6  -3  -2    0.43    0.42 
   6   3  -2    1.16    0.29 
  -6   3  -2    0.26    0.45 
  -6  -3   2    0.29    0.29 
   6   3   2    0.78    0.28 
  -6   3  -2    0.40    0.43 
   6   3   2    0.64    0.33 
   7   3  -2   27.31    1.21 
   7  -3   2   25.28    1.15 
  -7  -3  -2   24.83    1.23 
   7  -3   2   25.22    1.05 
   7   3  -2   25.71    1.13 
  -7   3   2   25.39    1.42 
   7  -3  -2   24.76    1.14 
  -7  -3   2   24.94    1.04 
  -7   3  -2   24.26    1.37 
   7   3   2   25.74    1.29 
  -7   3  -2   25.07    1.26 
   7   3   2   25.36    1.18 
  -8  -3  -2   18.42    1.12 
   8   3  -2   19.58    1.05 
   8   3  -2   17.89    0.95 
  -8   3   2   17.51    1.05 
   8  -3   2   18.40    0.94 
   8   3   2   18.75    0.96 
  -8  -3   2   18.03    0.91 
  -8   3  -2   18.56    1.12 
   8   3   2   18.58    1.12 
  -8   3  -2   16.14    1.22 
   8  -3  -2   21.73    0.98 
   9  -3   2    3.44    0.48 
   9   3  -2    3.01    0.61 
  -9  -3  -2    4.76    0.72 
   9   3  -2    3.85    0.51 
  -9   3   2    4.24    0.73 
   9  -3  -2    4.46    0.67 
   9   3   2    2.80    0.55 
  -9  -3   2    3.94    0.64 
   9   3   2    4.02    0.52 
  -9   3  -2    4.79    0.74 
  -9   3  -2    3.47    0.67 
  10   3  -2   10.21    1.01 
 -10   3   2    9.16    1.43 
  10  -3   2   10.07    1.19 
 -10  -3  -2   10.27    1.00 
  10  -3   2   12.14    1.51 
 -10   3   2    8.35    0.92 
  10   3  -2   10.23    0.85 
  10   3   2    9.25    0.86 
  10   3   2    9.63    1.66 
  10  -3  -2   10.85    1.26 
  10  -3  -2   11.07    0.83 
 -10  -3   2   10.40    0.86 
 -10   3  -2   12.58    1.22 
  11  -3   2    0.70    0.47 
 -11   3   2    1.22    0.69 
 -11   3   2    2.31    0.71 
  11  -3   2    0.55    0.57 
  11   3  -2    1.62    0.67 
  11   3  -2    0.70    0.53 
 -11   3  -2    0.78    0.80 
 -11   3  -2    1.08    0.67 
  11  -3  -2    1.29    0.45 
  11  -3  -2    2.15    0.59 
  12  -3   2    3.35    1.00 
  12   3  -2    2.32    0.67 
 -12   3   2    5.48    1.14 
  12   3  -2    2.27    0.72 
 -12  -3  -2    2.84    0.86 
  12  -3  -2    2.31    1.03 
 -12   3  -2    3.65    1.09 
  12  -3  -2    2.89    0.64 
  12   3   2    2.78    0.79 
   0   4   2   29.65    1.10 
   0  -4  -2   29.25    1.10 
   0   4   2   30.90    1.08 
   0   4  -2   28.21    1.00 
   0  -4  -2   30.87    1.08 
   0   4   2   32.12    0.97 
   0   4   2   29.70    1.09 
   0  -4  -2   31.72    0.97 
  -1  -4  -2  151.07    4.87 
   1   4  -2  159.58    4.72 
  -1  -4  -2  161.80    4.87 
  -1   4   2  165.82    4.77 
   1   4  -2  164.38    4.83 
  -1   4   2  158.50    4.83 
  -1   4   2  155.93    4.87 
  -1   4   2  159.17    4.92 
   1   4  -2  150.24    4.82 
   1  -4  -2  165.65    4.83 
   1   4   2  161.28    4.88 
   1  -4  -2  160.43    4.78 
  -1   4  -2  169.03    4.74 
  -1   4  -2  166.67    4.77 
   1   4   2  160.94    4.99 
  -1   4  -2  154.11    4.85 
   1  -4  -2  161.08    4.87 
  -2   4   2    1.11    0.19 
  -2   4   2    1.43    0.27 
   2  -4   2    1.29    0.25 
   2   4  -2    1.82    0.26 
   2   4  -2    1.18    0.15 
   2  -4   2    1.44    0.23 
   2   4  -2    0.79    0.17 
  -2   4   2    1.46    0.36 
  -2  -4  -2    1.61    0.30 
  -2  -4  -2    1.22    0.14 
   2  -4  -2    1.02    0.19 
  -2  -4   2    1.23    0.17 
  -2   4  -2    1.27    0.24 
  -2   4  -2    0.80    0.19 
   2   4   2    0.73    0.23 
   2   4   2    1.10    0.36 
   2  -4  -2    0.89    0.17 
  -3   4   2   71.59    2.43 
   3   4  -2   68.63    2.37 
   3   4  -2   75.43    2.28 
   3  -4   2   70.90    2.32 
   3   4  -2   71.28    2.23 
  -3  -4  -2   74.17    2.24 
  -3  -4  -2   71.55    2.39 
  -3   4  -2   74.63    2.41 
   3   4   2   74.04    2.50 
  -3  -4   2   72.14    2.27 
   3  -4  -2   75.98    2.31 
   3  -4  -2   70.60    2.31 
  -3  -4   2   77.39    2.24 
  -4   4   2   40.70    1.59 
   4   4  -2   41.24    1.36 
   4   4  -2   37.97    1.48 
  -4  -4  -2   39.91    1.49 
   4  -4   2   41.29    1.44 
  -4  -4  -2   42.48    1.38 
   4   4  -2   42.34    1.38 
   4  -4  -2   39.84    1.44 
  -4  -4   2   45.39    1.40 
  -4  -4   2   40.64    1.37 
   4   4   2   40.37    1.55 
  -4   4  -2   40.37    1.55 
   5  -4   2   40.86    1.50 
   5   4  -2   41.29    1.42 
  -5  -4  -2   41.45    1.56 
  -5   4   2   41.06    1.70 
   5   4  -2   41.28    1.58 
   5   4  -2   43.80    1.49 
   5  -4   2   40.91    1.34 
   5   4   2   41.83    1.63 
  -5  -4   2   41.00    1.41 
  -5   4  -2   42.15    1.66 
   5  -4  -2   42.00    1.52 
   6   4  -2    2.30    0.33 
   6  -4   2    2.30    0.39 
  -6   4   2    1.82    0.55 
   6  -4   2    1.92    0.36 
  -6  -4  -2    1.92    0.49 
   6   4  -2    1.59    0.40 
   6   4   2    2.15    0.34 
   6  -4  -2    1.49    0.36 
  -6  -4   2    2.43    0.37 
   6   4   2    2.59    0.68 
  -6   4  -2    1.33    0.62 
   7   4  -2   32.12    1.30 
   7  -4   2   31.67    1.37 
   7   4  -2   32.24    1.43 
  -7  -4  -2   34.17    1.46 
  -7   4   2   33.19    1.65 
   7  -4   2   33.64    1.22 
   7   4   2   34.53    1.51 
   7  -4  -2   32.34    1.38 
   7   4   2   33.32    1.32 
  -7   4  -2   32.01    1.59 
  -7  -4   2   30.71    1.24 
  -7   4  -2   31.48    1.48 
   8  -4   2    4.40    0.60 
   8   4  -2    4.57    0.65 
  -8  -4  -2    4.78    0.78 
   8   4  -2    4.54    0.59 
  -8  -4   2    5.64    0.61 
   8   4   2    5.32    0.62 
   8   4   2    4.94    0.80 
   8  -4  -2    5.72    0.54 
  -8   4  -2    3.33    1.00 
  -8   4  -2    5.34    0.76 
   9   4  -2    3.28    0.49 
  -9  -4  -2    4.50    0.76 
  -9   4   2    4.99    0.72 
   9  -4   2    4.32    0.70 
   9  -4  -2    3.57    0.54 
  -9  -4   2    4.20    0.69 
   9   4   2    4.19    0.62 
  -9   4  -2    4.28    0.73 
  -9   4  -2    4.63    0.77 
 -10  -4  -2    4.80    0.86 
  10  -4   2    4.34    0.64 
  10  -4   2    4.69    0.84 
 -10   4   2    4.65    0.84 
  10   4  -2    5.34    0.72 
 -10   4   2    5.85    0.89 
  10   4  -2    3.90    0.64 
  10   4   2    3.67    0.68 
  10  -4  -2    4.03    0.65 
 -10   4  -2    6.32    1.27 
  10  -4  -2    5.97    0.69 
 -10   4  -2    4.58    0.97 
 -11   4   2    3.52    0.88 
  11   4  -2    3.04    0.75 
  11  -4   2    3.80    0.68 
  11  -4  -2    3.05    0.66 
  11   4   2    3.64    0.75 
  11  -4  -2    3.73    0.61 
 -12  -4  -2    2.85    0.88 
  12   4  -2    2.05    0.71 
  12  -4   2    3.26    0.76 
 -12   4   2    1.28    0.92 
  12   4  -2    1.46    0.62 
 -12   4  -2    2.51    1.06 
  12  -4  -2    3.10    0.74 
  12   4   2    2.04    0.76 
   0  -5  -2   10.44    0.40 
   0   5  -2   10.81    0.40 
   0   5   2   10.20    0.54 
   0   5   2   11.27    0.41 
   0  -5  -2    9.89    0.56 
   0  -5  -2   10.19    0.58 
   0   5  -2    9.50    0.46 
  -1  -5  -2  137.84    4.36 
   1   5  -2  140.02    4.30 
  -1  -5  -2  139.76    4.16 
  -1   5   2  145.40    4.22 
  -1   5   2  140.75    4.29 
   1   5  -2  139.10    4.15 
   1   5  -2  142.03    4.30 
  -1   5   2  138.30    4.36 
  -1   5  -2  139.54    4.20 
  -1   5  -2  148.20    4.22 
  -1   5  -2  137.94    4.34 
   1   5   2  139.91    4.35 
   1  -5  -2  140.51    4.22 
   1  -5  -2  143.39    4.29 
   2   5  -2  228.27    6.91 
  -2   5   2  228.07    7.16 
   2  -5   2  234.79    7.01 
  -2   5   2  237.36    7.01 
   2   5  -2  216.89    7.08 
   2   5  -2  242.24    7.05 
  -2  -5  -2  238.73    6.92 
  -2   5   2  231.91    7.03 
  -2  -5  -2  238.07    7.13 
   2  -5  -2  245.32    7.04 
  -2   5  -2  253.34    7.02 
  -2   5  -2  230.81    7.11 
   2  -5  -2  235.85    7.02 
   2   5   2  235.89    7.15 
   3   5  -2   43.62    1.42 
   3   5  -2   41.44    1.31 
   3  -5   2   40.96    1.42 
  -3   5   2   42.00    1.57 
   3   5  -2   40.38    1.49 
  -3  -5  -2   41.76    1.51 
  -3  -5  -2   43.59    1.32 
   3  -5  -2   42.84    1.42 
  -3   5  -2   40.16    1.52 
  -3  -5   2   41.01    1.41 
   3  -5  -2   38.72    1.41 
  -3  -5   2   43.16    1.32 
   3   5   2   39.70    1.55 
   4   5  -2   37.99    1.33 
  -4  -5  -2   38.28    1.28 
   4   5  -2   37.97    1.26 
   4  -5   2   36.94    1.37 
  -4   5   2   36.97    1.55 
  -4  -5  -2   36.24    1.43 
   4   5  -2   39.66    1.47 
   4  -5  -2   38.11    1.38 
  -4   5  -2   37.72    1.50 
  -4  -5   2   38.07    1.33 
   4   5   2   39.30    1.52 
  -4  -5   2   40.69    1.28 
   4  -5  -2   38.72    1.35 
   5   5  -2   10.66    0.73 
   5   5  -2   10.97    0.65 
   5  -5   2   10.98    0.66 
  -5  -5  -2   10.71    0.74 
   5   5  -2   10.43    0.54 
  -5   5   2   10.22    1.03 
  -5  -5   2   11.32    0.60 
  -5   5  -2   10.98    0.90 
   5   5   2   11.51    0.84 
   5  -5  -2   11.15    0.69 
  -6  -5  -2   20.65    1.07 
   6   5  -2   21.96    0.90 
   6  -5   2   20.20    1.00 
  -6   5   2   21.34    1.28 
   6   5  -2   22.11    1.10 
   6   5   2   22.47    1.18 
   6  -5  -2   21.60    1.01 
  -6   5  -2   21.55    1.26 
  -6  -5   2   21.97    0.95 
   7  -5   2   24.70    1.15 
   7   5  -2   23.04    1.22 
   7   5  -2   24.97    1.05 
  -7  -5  -2   23.23    1.24 
   7  -5   2   23.64    0.94 
  -7   5   2   24.59    1.56 
   7  -5  -2   23.87    1.14 
   7   5   2   25.04    1.31 
  -7   5  -2   23.24    1.40 
  -7  -5   2   23.96    1.03 
   8   5  -2   40.98    1.80 
  -8  -5  -2   37.99    1.69 
   8   5  -2   39.00    1.54 
   8  -5   2   37.81    1.44 
  -8   5  -2   37.51    1.85 
   8   5   2   40.86    1.81 
  -8  -5   2   38.70    1.49 
   8  -5  -2   43.41    1.49 
  -8   5  -2   38.24    1.76 
   9  -5   2    1.57    0.38 
  -9  -5  -2    2.29    0.62 
  -9   5   2    1.23    0.62 
   9   5  -2    1.88    0.41 
  -9   5   2    2.04    0.60 
   9   5  -2    1.47    0.42 
  -9  -5   2    2.03    0.53 
   9  -5  -2    1.74    0.39 
 -10  -5  -2    1.61    0.64 
  10   5  -2    1.43    0.51 
 -10   5   2    0.36    0.59 
  10   5  -2    1.39    0.54 
  10  -5   2    1.20    0.50 
  10  -5  -2    2.09    0.40 
 -10   5  -2    1.63    0.79 
  10  -5  -2    1.12    0.50 
 -10  -5   2    2.24    0.59 
 -10   5  -2    1.02    0.71 
 -11   5   2    4.58    0.96 
  11  -5   2    4.12    0.76 
 -11   5   2    4.24    0.93 
  11   5  -2    4.32    0.66 
  11   5  -2    3.60    0.76 
  11  -5  -2    3.74    0.74 
  11   5   2    4.67    0.82 
 -11   5  -2    4.94    0.89 
 -11   5  -2    6.05    1.71 
  11  -5  -2    6.14    0.82 
   0   6   2    1.63    0.26 
   0   6   2    1.52    0.30 
   0   6  -2    1.89    0.20 
   0   6  -2    1.71    0.31 
   0   6   2    1.86    0.21 
   0  -6  -2    1.73    0.20 
   0  -6  -2    1.99    0.38 
  -1  -6  -2    7.23    0.55 
  -1   6   2    7.17    0.55 
   1   6  -2    6.82    0.45 
  -1  -6  -2    7.62    0.30 
  -1   6   2    7.01    0.47 
  -1   6   2    7.04    0.39 
  -1   6  -2    6.57    0.53 
   1  -6  -2    7.83    0.38 
  -1   6  -2    7.03    0.38 
   1   6   2    7.39    0.55 
   1  -6  -2    7.54    0.53 
  -1   6  -2    8.54    0.39 
  -2   6   2    1.86    0.34 
  -2   6   2    2.19    0.35 
   2   6  -2    2.67    0.37 
  -2  -6  -2    2.56    0.20 
   2  -6   2    2.11    0.28 
  -2  -6  -2    2.31    0.43 
   2   6   2    2.22    0.35 
  -2   6  -2    2.61    0.33 
  -2   6  -2    2.68    0.46 
   2  -6  -2    2.30    0.29 
  -2   6  -2    2.51    0.20 
   3   6  -2   32.23    1.01 
  -3  -6  -2   31.13    1.27 
   3   6  -2   30.53    1.26 
  -3  -6  -2   31.92    1.03 
   3  -6   2   30.09    1.15 
  -3   6   2   30.82    1.34 
  -3  -6   2   32.64    1.02 
   3  -6  -2   32.04    1.16 
   3  -6  -2   32.41    1.16 
   3   6   2   32.04    1.33 
  -3  -6   2   31.85    1.17 
  -3   6  -2   31.92    1.31 
   4   6  -2   18.34    0.92 
  -4  -6  -2   17.58    0.69 
  -4   6   2   16.10    1.01 
   4  -6   2   15.81    0.79 
   4   6  -2   17.77    0.66 
  -4  -6  -2   16.60    0.90 
   4  -6  -2   18.28    0.83 
  -4  -6   2   18.63    0.68 
  -4  -6   2   17.26    0.78 
  -4   6  -2   17.92    0.99 
   4   6   2   18.16    1.00 
   4  -6  -2   17.06    0.80 
   5  -6   2   25.09    1.10 
   5   6  -2   26.85    0.95 
  -5  -6  -2   25.36    1.17 
  -5   6   2   26.09    1.35 
   5   6  -2   27.20    1.21 
   5   6   2   25.62    1.28 
   5  -6  -2   24.67    1.12 
  -5   6  -2   23.42    1.43 
  -5  -6   2   24.91    1.05 
  -6  -6  -2   31.38    1.41 
   6  -6   2   31.50    1.31 
  -6   6   2   32.31    1.63 
   6   6  -2   31.98    1.18 
   6   6  -2   33.13    1.44 
   6  -6  -2   31.29    1.33 
  -6   6  -2   30.97    1.57 
  -6  -6   2   31.66    1.24 
   6   6   2   31.47    1.50 
   7   6  -2   28.93    1.63 
   7  -6   2   27.18    1.25 
   7   6  -2   29.48    1.16 
  -7  -6  -2   27.63    1.53 
   7   6   2   28.80    1.47 
  -7  -6   2   28.86    1.18 
   7  -6  -2   27.35    1.27 
  -7   6  -2   27.96    1.56 
   8   6  -2   39.60    1.53 
  -8  -6  -2   39.10    1.66 
  -8   6  -2   38.09    1.87 
  -8  -6   2   37.07    1.51 
   9   6  -2   11.98    0.84 
   9  -6   2   11.38    0.96 
  -9   6   2   10.80    1.50 
   9   6  -2   10.66    1.07 
  -9  -6  -2   11.16    1.00 
   9  -6  -2   14.42    0.83 
  -9  -6   2   12.19    0.94 
  -9   6  -2   11.63    1.26 
   9   6   2   12.92    1.18 
   9  -6  -2   12.46    0.97 
  10   6  -2    4.99    0.61 
  10   6  -2    3.84    0.72 
 -10   6   2    4.34    0.88 
 -10  -6  -2    5.80    0.96 
  10  -6   2    3.74    0.67 
  10  -6  -2    6.26    0.91 
  10  -6  -2    4.93    0.80 
 -10   6  -2    6.40    1.26 
 -10   6  -2    4.85    0.84 
  10   6   2    6.76    1.22 
 -10  -6   2    6.98    1.22 
  11   6  -2    2.17    0.69 
  11  -6   2    0.79    0.63 
 -11   6   2    2.24    0.89 
 -11   6   2    3.59    0.90 
  11   6  -2    2.32    0.57 
 -11   6  -2    1.36    1.00 
 -11   6  -2    2.60    0.82 
  11  -6  -2    2.27    0.68 
  11   6   2    1.70    0.74 
   0   7   2  266.52    7.75 
   0  -7  -2  269.01    7.79 
   0   7  -2  278.66    7.73 
   0  -7  -2  260.52    8.00 
   0   7   2  249.39    7.97 
   0   7  -2  257.57    7.86 
   0   7   2  255.16    7.92 
  -1  -7  -2   18.32    0.91 
  -1   7   2   18.56    0.69 
  -1   7   2   17.33    0.90 
  -1   7   2   17.76    0.80 
   1   7  -2   17.99    0.82 
   1   7   2   17.19    0.87 
   1  -7  -2   17.81    0.68 
  -1   7  -2   17.38    0.89 
  -1   7  -2   18.32    0.72 
  -1   7  -2   18.23    0.69 
  -2  -7  -2   40.74    1.58 
  -2   7   2   41.26    1.61 
   2   7  -2   42.21    1.55 
  -2   7   2   41.09    1.46 
   2   7   2   41.07    1.60 
  -2   7  -2   41.94    1.33 
   2  -7  -2   40.57    1.44 
   2  -7  -2   44.13    1.59 
  -2   7  -2   40.25    1.59 
  -3  -7  -2   14.23    0.82 
  -3  -7  -2   14.66    0.53 
   3  -7   2   13.84    0.67 
   3   7  -2   15.20    0.80 
   3   7   2   13.44    1.00 
   3  -7  -2   14.01    0.67 
  -3   7  -2   13.48    0.84 
   4  -7   2   19.65    0.90 
  -4  -7  -2   20.77    1.03 
  -4  -7  -2   22.08    0.76 
   4   7  -2   21.35    0.73 
  -4   7   2   21.24    1.34 
   4   7   2   18.78    1.54 
  -4  -7   2   21.49    0.80 
  -4   7  -2   19.85    1.16 
   4  -7  -2   19.81    0.92 
   4  -7  -2   19.87    0.92 
  -4  -7   2   20.16    0.92 
   5   7  -2   73.33    2.25 
   5   7  -2   74.69    2.59 
  -5  -7  -2   69.19    2.83 
  -5  -7  -2   74.74    2.30 
  -5   7   2   71.05    2.67 
  -5  -7   2   70.37    2.25 
   5  -7  -2   67.92    2.57 
  -5   7  -2   69.89    2.64 
   5   7   2   70.96    2.63 
  -5  -7   2   70.75    2.39 
   6   7  -2   10.94    0.93 
  -6   7   2   10.85    1.03 
   6   7  -2   10.82    0.85 
   6  -7   2   11.42    0.78 
  -6   7  -2   12.32    1.12 
   6  -7  -2   12.10    0.79 
  -6  -7   2   12.38    0.76 
   6   7   2   11.42    0.96 
   7   7  -2    7.21    0.62 
   7  -7   2    7.70    0.70 
  -7  -7  -2    5.96    0.80 
  -7  -7   2    6.63    0.69 
   7  -7  -2    7.14    0.69 
  -7   7  -2    7.51    1.05 
  -8  -7  -2    0.77    0.54 
   8   7  -2    1.28    0.47 
   8   7   2    0.63    0.49 
  -8  -7   2    2.01    0.53 
   8  -7  -2    0.81    0.70 
  -8   7  -2    0.74    0.58 
  -9   7   2    0.16    0.67 
   9   7  -2    0.32    0.53 
   9   7  -2    0.09    0.39 
  -9  -7  -2    0.97    0.58 
   9  -7  -2    0.00    0.33 
  -9  -7   2    1.31    0.55 
  -9   7  -2   -0.17    0.64 
  -9   7  -2    0.79    0.74 
 -10   7   2    0.73    0.75 
 -10  -7  -2    2.64    0.75 
  10   7  -2    0.25    0.57 
  10   7  -2    1.66    0.49 
  10  -7   2    1.05    0.56 
 -10   7  -2    1.69    0.75 
  10  -7  -2    1.07    0.58 
  10   7   2    1.44    0.66 
 -10   7  -2    0.43    0.90 
  11   7  -2    2.25    0.59 
 -11   7   2    1.85    0.99 
 -11  -7  -2    2.34    0.81 
  11   7  -2    2.04    0.77 
  11   7   2    1.91    0.75 
 -11   7  -2    2.87    1.15 
 -11   7  -2    2.94    0.88 
   0   8   2   90.68    3.10 
   0   8  -2   95.90    2.79 
   0  -8  -2   92.74    2.79 
   0   8  -2   92.46    2.96 
   0   8   2   90.99    3.04 
  -1   8   2   13.69    0.66 
  -1  -8  -2   14.49    0.84 
  -1   8   2   14.95    0.75 
   1   8  -2   13.55    0.77 
  -1   8   2   13.27    0.85 
   1   8   2   15.03    0.84 
  -1   8  -2   14.14    0.85 
  -1   8  -2   15.84    0.62 
   1  -8  -2   14.56    0.60 
  -1   8  -2   14.57    0.65 
  -2   8   2   33.73    1.27 
  -2  -8  -2   32.58    1.40 
  -2   8   2   34.07    1.45 
   2   8  -2   33.77    1.39 
  -2   8  -2   33.00    1.42 
   2  -8  -2   33.46    1.19 
  -2   8  -2   34.36    1.14 
   2   8   2   33.90    1.42 
  -3   8   2    7.93    0.95 
  -3  -8  -2    8.63    0.75 
   3  -8   2    8.69    0.54 
  -3   8   2    8.92    0.57 
   3   8  -2    9.24    0.78 
   3  -8  -2    8.86    0.55 
  -3   8  -2    8.01    0.92 
   3   8   2    6.76    1.03 
   4   8  -2   45.34    1.89 
   4  -8   2   40.95    1.62 
  -4  -8  -2   43.36    1.36 
  -4   8   2   41.04    1.80 
  -4  -8  -2   41.21    1.71 
   4  -8  -2   43.40    1.58 
  -4   8  -2   42.82    1.79 
   4   8   2   43.14    1.81 
   5   8  -2    0.22    0.21 
  -5  -8  -2    0.68    0.29 
  -5   8   2    1.05    0.54 
   5  -8   2   -0.39    0.33 
  -5  -8  -2    0.46    0.58 
   5   8  -2    0.91    0.37 
  -5   8  -2    1.10    0.53 
  -5  -8   2    0.10    0.26 
   5  -8  -2    0.26    0.35 
  -5  -8   2    0.41    0.41 
   5   8   2    0.74    0.42 
  -6  -8  -2    3.27    0.66 
   6  -8   2    2.86    0.47 
   6   8  -2    2.26    0.45 
   6   8  -2    3.00    0.42 
  -6  -8   2    3.36    0.55 
   6  -8  -2    2.83    0.46 
  -6   8  -2    3.21    0.66 
   7   8  -2    4.43    0.52 
   7  -8   2    4.62    0.58 
  -7  -8  -2    5.35    0.81 
  -7   8  -2    5.21    0.95 
   7  -8  -2    6.26    0.70 
  -7  -8   2    3.95    0.69 
   8  -8   2   10.51    0.91 
  -8   8   2    8.37    1.25 
   8   8  -2   11.69    0.80 
  -8  -8  -2   11.32    0.98 
  -8   8  -2   11.15    1.30 
  -8  -8   2   11.68    0.93 
   8  -8  -2   10.99    0.89 
   8   8   2   10.14    1.19 
   9   8  -2   23.18    1.58 
   9  -8   2   23.20    1.36 
  -9  -8  -2   25.24    1.40 
   9   8  -2   23.88    1.15 
  -9   8   2   21.91    1.71 
   9  -8  -2   23.56    1.35 
   9   8   2   24.56    1.67 
  -9   8  -2   23.26    1.66 
  -9  -8   2   25.07    1.33 
  10  -8   2    1.24    0.63 
  10   8  -2    1.62    0.66 
  10   8  -2    1.48    0.50 
 -10   8   2    1.21    0.80 
 -10   8  -2    1.93    1.02 
  10   8   2    1.10    0.69 
 -10   8  -2    0.79    0.77 
  10  -8  -2    1.15    0.64 
 -11   8   2    2.72    1.03 
  11  -8   2    1.17    0.95 
 -11  -8  -2    2.73    0.89 
 -11   8   2    1.97    1.10 
  11   8  -2    0.47    0.72 
  11   8  -2    0.94    1.07 
  11   8   2    1.28    0.91 
 -11   8  -2    1.25    1.09 
   0   9  -2   20.68    0.70 
   0  -9  -2   19.81    0.71 
   0   9   2   19.06    1.00 
   0   9  -2   20.65    0.93 
  -1   9   2   73.48    2.47 
  -1   9   2   72.30    2.81 
  -1   9   2   69.94    2.27 
   1   9  -2   73.00    2.49 
   1   9   2   74.18    2.55 
  -1   9  -2   74.69    2.38 
   1  -9  -2   71.60    2.28 
  -1   9  -2   74.05    2.28 
  -2   9   2    8.80    0.84 
  -2   9   2    8.48    0.62 
   2   9  -2    7.20    0.74 
  -2   9  -2    8.30    0.49 
  -2   9  -2    8.83    0.81 
   2   9   2    7.14    0.82 
   2  -9  -2    7.95    0.52 
   3  -9   2   65.93    2.22 
  -3   9   2   67.66    2.52 
   3   9  -2   69.13    2.54 
  -3  -9  -2   64.11    2.62 
  -3   9   2   69.44    2.27 
   3  -9  -2   68.06    2.25 
   3   9   2   67.47    2.50 
  -3   9  -2   68.68    2.62 
  -4   9   2   26.55    1.43 
   4  -9   2   26.54    1.15 
   4   9  -2   26.91    1.35 
  -4  -9  -2   25.61    1.32 
  -4   9  -2   27.56    1.44 
   4  -9  -2   26.96    1.17 
   4   9   2   27.25    1.41 
   5   9  -2  136.23    4.59 
   5  -9   2  136.22    4.34 
  -5  -9  -2  131.66    4.46 
   5  -9  -2  139.94    4.35 
  -5   9  -2  134.19    4.58 
  -5  -9   2  135.25    4.37 
   5   9   2  138.95    4.62 
   6  -9   2    0.80    0.37 
  -6  -9  -2    0.64    0.50 
   6   9  -2    0.93    0.41 
  -6   9  -2    0.59    0.56 
  -6  -9   2    0.74    0.47 
   6  -9  -2   -0.01    0.34 
   7   9  -2    2.18    0.35 
  -7  -9  -2    1.94    0.61 
  -7   9  -2    1.39    0.68 
  -7  -9   2    1.53    0.62 
   8  -9   2    4.65    0.66 
  -8  -9  -2    5.16    0.81 
   8   9  -2    5.30    0.62 
  -8   9   2    3.46    0.90 
   8   9  -2    5.92    1.03 
   8  -9  -2    6.06    0.82 
  -8  -9   2    5.18    0.90 
  -8   9  -2    4.72    0.91 
   8   9   2    3.63    0.81 
  -9   9   2    2.25    0.82 
   9  -9   2    2.23    0.64 
   9   9  -2    2.61    0.65 
   9   9   2    2.69    0.69 
  -9   9  -2    2.39    0.81 
   9  -9  -2    2.93    0.64 
  -9  -9   2    3.77    0.89 
  10  -9   2    0.01    0.66 
 -10   9   2    1.61    0.91 
  10   9  -2    0.96    0.64 
 -10   9  -2    1.10    1.10 
  10  -9  -2    0.44    0.64 
 -10   9  -2    1.07    0.82 
  10   9   2    0.94    0.76 
   0  10  -2   86.55    2.85 
   0 -10  -2   85.35    2.60 
   0  10  -2   81.91    3.01 
   0  10   2   89.50    2.95 
   0  10   2   86.82    3.05 
  -1  10   2   26.04    1.32 
  -1  10   2   24.30    0.96 
  -1  10   2   27.03    1.20 
   1  10  -2   27.32    1.21 
  -1  10  -2   26.59    0.97 
  -1  10  -2   26.44    1.10 
   1  10   2   25.34    1.30 
  -1  10  -2   27.45    1.34 
   1 -10  -2   26.84    0.96 
  -2  10   2    5.92    0.76 
  -2  10   2    4.93    0.59 
  -2 -10  -2    5.50    0.68 
   2  10  -2    5.28    0.87 
   2  10   2    4.43    0.75 
  -2  10  -2    4.90    0.75 
  -2  10  -2    4.02    0.46 
   2 -10  -2    4.44    0.45 
  -3  10   2   41.87    1.57 
   3  10  -2   39.91    1.71 
  -3 -10  -2   39.95    1.73 
  -3  10   2   38.75    1.76 
   3 -10  -2   39.83    1.47 
  -3  10  -2   40.26    1.78 
   3  10   2   40.78    1.76 
   4  10  -2    6.67    0.83 
   4 -10   2    6.10    0.64 
  -4 -10  -2    5.30    0.78 
   4 -10  -2    6.15    0.78 
   4  10   2    5.71    0.84 
  -4  10  -2    7.43    0.92 
   5 -10   2    0.00    0.32 
  -5 -10  -2    0.28    0.46 
   5  10  -2   -0.10    0.36 
  -5  10  -2    0.49    0.53 
   5  10   2    1.13    0.47 
   5 -10  -2    0.16    0.33 
   6 -10   2    9.75    0.79 
   6  10  -2    9.94    1.08 
  -6 -10  -2   11.44    0.96 
   6  10   2    7.87    1.10 
   6 -10  -2   11.83    0.81 
  -6  10  -2   10.96    1.21 
  -7 -10  -2    3.62    0.70 
   7  10  -2    2.08    0.58 
  -7  10   2    2.97    1.18 
   7  10   2    1.59    0.65 
  -7 -10   2    3.54    0.76 
  -7  10  -2    2.90    0.74 
  -8  10   2    2.99    0.80 
   8  10  -2    0.96    0.56 
  -8  10  -2    0.87    0.72 
  -8 -10   2    2.37    0.68 
   8  10   2    1.20    0.62 
  -9  10   2    6.35    1.08 
   9 -10   2    7.21    1.10 
   9  10  -2    5.24    0.85 
  -9  10  -2    5.91    1.05 
   9  10   2    7.43    1.29 
   9 -10  -2    5.80    0.85 
 -10  10   2   -0.89    0.85 
 -10 -10  -2    2.17    0.85 
  10 -10   2    0.32    0.85 
  10  10  -2   -0.55    0.67 
  10  10   2    0.84    0.84 
  10 -10  -2    0.12    0.89 
   0  11   2    3.22    0.56 
   0  11  -2    3.17    0.44 
   0  11   2    3.99    0.71 
   0  11  -2    2.93    0.53 
  -1  11   2    2.16    0.40 
   1  11  -2    0.91    0.43 
  -1  11   2    1.69    0.46 
  -1  11   2    1.86    0.31 
  -1  11  -2    1.90    0.31 
   1  11   2    1.44    0.46 
   1 -11  -2    2.02    0.27 
  -1  11  -2    1.72    0.47 
   2  11  -2   11.90    0.94 
  -2  11   2   12.56    0.85 
   2 -11  -2   13.07    0.68 
  -2  11  -2   13.71    1.04 
   2  11   2   12.57    0.97 
  -2  11  -2   13.10    0.70 
   3  11  -2    7.66    1.01 
  -3  11   2    9.87    0.74 
  -3 -11  -2   10.63    0.91 
   3 -11  -2    8.82    0.71 
  -3  11  -2    9.52    1.02 
   3  11   2    9.89    0.93 
  -4 -11  -2   -0.05    0.49 
   4  11  -2   -0.19    0.37 
   4  11   2    0.00    0.41 
  -4  11  -2   -0.26    0.46 
   4 -11  -2   -0.07    0.36 
   5  11  -2    1.57    0.47 
   5 -11   2    2.37    0.45 
  -5 -11  -2    2.00    0.60 
  -5  11  -2    1.45    0.61 
   5 -11  -2    1.75    0.43 
   5  11   2    2.07    0.53 
  -6 -11  -2    0.51    0.56 
   6 -11   2    0.45    0.40 
   6  11  -2    0.04    0.44 
   6  11   2   -0.02    0.47 
  -6  11  -2    0.29    0.62 
   6 -11  -2    0.48    0.39 
  -7  11   2    4.17    0.88 
   7  11  -2    3.44    0.68 
   7 -11   2    4.58    0.63 
   7 -11  -2    4.06    0.65 
   7  11   2    4.01    0.75 
  -7  11  -2    4.30    0.99 
   8 -11   2    0.22    0.77 
  -8  11   2    0.38    0.74 
   8  11  -2    1.17    0.58 
  -8 -11  -2    1.18    0.85 
   8 -11  -2    1.11    0.56 
   8  11   2    0.00    0.62 
  -8  11  -2   -0.18    0.71 
   9  11  -2    5.17    0.99 
  -9 -11  -2    7.21    1.30 
   9 -11   2    5.74    0.83 
  -9  11   2    4.48    1.26 
   9 -11  -2    5.21    0.85 
  -9  11  -2    4.26    1.06 
   9  11   2    4.21    1.14 
   0  12  -2    0.04    0.40 
   0  12  -2   -0.23    0.33 
   0  12   2    0.21    0.37 
   1  12  -2    1.28    0.43 
  -1  12   2    1.68    0.44 
   1  12   2    1.04    0.49 
   1  12   2    1.48    0.41 
  -1  12  -2    2.22    0.53 
   1 -12  -2    2.09    0.29 
  -2  12   2    7.80    0.75 
   2  12  -2    6.95    0.83 
  -2  12  -2    6.88    0.97 
   2  12   2    7.28    0.86 
   2 -12  -2    6.48    0.54 
  -2  12  -2    5.52    0.59 
  -3  12   2   18.86    1.01 
   3  12  -2   15.71    1.12 
   3 -12  -2   18.13    0.89 
   3  12   2   17.87    1.19 
  -3  12  -2   18.55    1.31 
   4  12  -2    0.53    0.45 
  -4 -12  -2    0.37    0.57 
   4 -12  -2    0.41    0.39 
  -4  12  -2   -0.24    0.52 
   4  12   2    0.57    0.44 
   5  12  -2    1.45    0.52 
  -5  12  -2    0.87    0.64 
   5 -12  -2    1.84    0.43 
   5  12   2    1.37    0.52 
   6  12  -2    5.14    0.89 
  -6  12   2    6.69    0.96 
  -6  12  -2    6.24    1.32 
  -7  12   2    0.64    0.79 
   7  12  -2    0.13    0.56 
   7 -12   2    1.52    0.52 
  -7 -12  -2    0.75    0.67 
  -7  12  -2   -0.09    0.76 
   7 -12  -2    1.28    0.51 
   7  12   2    0.02    0.60 
  -8  12   2    0.96    0.89 
   8  12  -2    0.99    0.66 
   8 -12   2    1.47    0.65 
   8  12   2    2.55    0.75 
   8 -12  -2    1.74    0.65 
  -8  12  -2    2.24    0.89 
  -9 -12  -2    1.60    0.98 
   9  12  -2   -0.89    0.65 
   9  12   2   -1.06    0.67 
   9 -12  -2    1.54    0.70 
   0  13   2    7.82    0.84 
   0  13  -2    8.93    1.04 
   0  13  -2    7.91    1.37 
   1  13  -2    0.31    0.37 
   1  13  -2   -0.43    0.42 
  -1  13   2   -0.15    0.36 
  -1  13  -2    0.69    0.34 
  -1  13  -2    0.42    0.56 
   1 -13  -2    0.67    0.26 
   1  13   2   -0.36    0.37 
  -2  13   2   11.27    0.99 
   2  13  -2   10.98    0.95 
   2 -13  -2   11.84    0.69 
  -2  13  -2   10.54    0.74 
  -2  13  -2   11.34    1.70 
  -3  13   2   21.61    1.21 
   3  13  -2   18.78    1.27 
  -3  13  -2   20.18    1.46 
  -3  13  -2   19.28    0.88 
   3 -13  -2   19.09    0.99 
   4  13  -2    0.43    0.45 
  -4  13  -2   -0.85    0.56 
   4  13   2   -0.71    0.47 
   5  13  -2    0.82    0.59 
  -5  13   2    0.28    0.74 
  -5 -13  -2    1.09    0.70 
  -5  13  -2    0.07    0.71 
   5  13   2    1.52    0.69 
   5 -13  -2    1.10    0.43 
  -6 -13  -2    0.30    0.71 
   6  13  -2    0.05    0.51 
  -6  13   2    0.20    0.74 
  -6  13  -2   -0.28    0.78 
   6  13   2   -0.85    0.54 
   7  13  -2    2.66    0.67 
  -7  13   2    1.60    0.97 
   7  13   2    1.75    0.69 
  -7  13  -2    1.32    0.95 
  -8 -13  -2    2.99    0.93 
  -8  13   2    1.85    1.00 
   8  13  -2    1.18    0.87 
   8  13   2    0.60    0.81 
   8 -13  -2    0.67    0.65 
   0  14   2    0.86    0.42 
   0  14  -2    0.13    0.57 
   0  14   2    0.88    0.69 
  -1  14   2    6.16    0.81 
   1  14  -2    6.25    0.84 
   1  14  -2    6.86    1.21 
   1  14   2    7.01    1.12 
  -1  14  -2    6.91    0.88 
  -1  14  -2    6.67    0.95 
   1  14   2    5.49    0.69 
   2  14  -2    4.64    0.83 
  -2  14   2    2.99    0.52 
   2  14   2    2.15    0.55 
  -2  14  -2    2.20    0.41 
  -2  14  -2    3.17    1.33 
   2 -14  -2    2.80    0.41 
  -3  14   2    6.25    0.95 
  -3  14   2    7.69    1.31 
   3  14  -2    9.48    1.02 
   3  14   2    8.70    1.09 
  -3  14  -2   10.25    1.58 
   3 -14  -2    6.71    0.76 
   4  14  -2    0.03    0.51 
  -4  14   2   -0.73    0.65 
  -4  14  -2   -1.24    0.65 
   4 -14  -2    0.75    0.41 
  -5  14   2    0.14    0.86 
   5  14  -2    0.38    0.56 
  -5  14  -2   -0.04    0.81 
   5  14   2    1.17    0.62 
   6  14  -2    1.40    0.59 
  -6  14   2   -0.68    0.82 
  -6  14  -2    1.24    0.90 
   6  14   2    0.83    0.67 
   6 -14  -2    1.33    0.56 
  -7 -14  -2    0.96    0.96 
   7  14  -2   -1.08    0.70 
  -7  14   2   -0.84    1.10 
   7 -14  -2    0.64    0.61 
   0  15   2    3.46    0.57 
   0  15  -2    3.12    0.53 
   0  15   2    3.52    0.85 
   1  15  -2    1.39    0.50 
  -1  15   2    0.78    0.66 
   1  15  -2    2.65    0.75 
  -1  15   2    2.34    0.50 
  -1  15  -2    0.98    0.53 
   1  15   2    1.40    0.52 
  -1  15  -2    2.49    0.77 
   1  15   2    1.55    0.71 
   2  15  -2    1.70    0.49 
  -2  15   2    2.49    0.82 
  -2  15   2    2.34    0.53 
   2  15  -2    3.31    0.77 
   2  15   2    2.35    0.59 
   2  15   2    2.42    0.74 
  -2  15  -2    2.84    0.78 
  -3  15   2    6.08    1.06 
   3  15  -2    7.89    1.13 
  -3  15   2    6.14    0.95 
  -3  15  -2    5.73    1.01 
  -4  15   2    1.01    0.85 
   4  15  -2    2.10    0.62 
   4  15   2    1.82    0.64 
  -4  15  -2    0.17    0.83 
   4 -15  -2    2.27    0.49 
   5  15  -2    0.34    0.62 
  -5  15   2   -1.64    0.88 
  -5  15  -2   -1.08    0.88 
   5 -15  -2    0.16    0.50 
   5  15   2    0.06    0.85 
  -6  15   2   -0.32    0.99 
   6  15  -2    0.77    0.63 
   6  15   2   -0.68    0.87 
   6 -15  -2    0.85    0.57 
   0  16  -2    1.65    0.84 
   0  16   2    1.33    0.53 
   0  16   2    3.31    0.91 
   0  16  -2    0.64    0.46 
  -1  16   2    0.70    0.50 
  -1  16   2    1.07    0.80 
   1  16  -2    1.69    0.83 
   1  16   2    3.07    0.89 
  -1  16  -2   -0.37    0.76 
  -1  16  -2    0.87    0.48 
   1  16   2    0.78    0.54 
   2  16  -2    0.86    0.54 
  -2  16   2    0.06    0.50 
  -2  16   2   -0.34    0.80 
   2  16  -2   -0.67    0.76 
  -2  16  -2   -0.21    0.77 
   2  16   2   -0.06    0.79 
  -3  16   2    0.57    0.90 
   3  16  -2    0.66    0.61 
   3  16   2    2.90    0.85 
   3  16   2    1.18    0.62 
  -3  16  -2    1.70    0.91 
   4  16  -2    2.91    0.73 
  -4  16   2    4.83    2.23 
  -4  16  -2    0.74    1.87 
   5  16  -2   -1.25    0.65 
   5  16   2    0.61    0.82 
   0  17   2   -2.87    1.45 
   0  17  -2   -0.56    1.87 
   0  17   2    0.48    0.57 
   0  17  -2   -0.04    0.49 
  -1  17   2    0.97    0.58 
  -1  17   2    2.37    1.32 
   1  17  -2    3.07    1.65 
   1  17  -2    1.48    0.69 
   1  17   2    0.63    0.73 
   1  17   2    3.15    1.73 
   2  17  -2    0.44    0.91 
  -2  17   2   -0.59    0.93 
   2  17  -2    0.87    0.98 
   2  17   2   -0.68    0.62 
  -2  17  -2    0.31    1.03 
   2  17   2   -0.61    0.94 
   3  17  -2   -0.25    0.65 
   0   0   3    0.11    0.14 
   0   0  -3    0.02    0.13 
   0   0  -3   -0.01    0.10 
   2   0  -3  936.99   27.99 
  -2   0   3 1000.00   27.96 
  -2   0  -3  941.51   27.96 
   2   0   3  947.70   28.01 
  -3   0  -3   78.37    2.51 
  -3   0  -3   78.99    2.53 
  -3   0  -3   77.35    2.58 
   3   0   3   77.69    2.51 
   3   0  -3   78.83    2.51 
   3   0   3   83.82    2.55 
  -3   0   3   78.09    2.58 
  -3   0  -3   85.50    2.59 
   3   0  -3   83.88    2.62 
  -3   0   3   80.21    2.52 
   3   0   3   85.05    2.67 
   4   0  -3   85.41    2.72 
   4   0   3   90.84    2.73 
  -4   0   3   85.45    2.82 
  -4   0  -3   79.79    2.68 
   4   0   3   86.67    2.73 
  -4   0   3   86.19    2.62 
  -4   0  -3   86.67    2.76 
  -4   0  -3   87.88    2.80 
   5   0   3   38.64    1.42 
  -5   0   3   38.99    1.55 
   5   0  -3   39.07    1.41 
   5   0   3   38.89    1.43 
  -5   0  -3   40.45    1.51 
  -5   0  -3   39.26    1.49 
  -5   0   3   40.45    1.32 
   6   0  -3    7.75    0.61 
  -6   0   3    8.59    0.53 
  -6   0  -3    8.36    0.74 
   6   0   3    8.76    0.63 
  -6   0   3    7.34    0.90 
   6   0   3    8.40    0.62 
  -6   0  -3    8.24    0.72 
  -7   0  -3   10.48    1.02 
  -7   0  -3   10.52    1.03 
   7   0  -3   10.31    0.72 
  -7   0   3   10.30    0.91 
   7   0   3   10.85    0.79 
  -7   0   3   11.55    0.68 
   7   0   3   11.57    0.73 
   8   0   3   18.20    0.97 
  -8   0  -3   19.12    1.15 
   8   0  -3   19.89    0.99 
   8   0  -3   19.26    1.00 
  -8   0  -3   19.34    1.20 
  -8   0   3   19.43    0.96 
   8   0   3   19.39    1.12 
   9   0  -3    1.22    0.33 
  -9   0   3    1.47    0.50 
  -9   0  -3    1.55    0.51 
   9   0   3    0.81    0.40 
   9   0   3    1.28    0.44 
  -9   0  -3    1.02    0.55 
 -10   0   3    3.92    0.69 
  10   0   3    3.84    0.57 
 -10   0  -3    4.03    0.71 
 -10   0  -3    4.74    0.79 
  10   0  -3    3.04    0.56 
  10   0   3    3.39    0.58 
  11   0  -3    0.11    0.53 
 -11   0  -3    3.04    1.33 
 -11   0   3    0.56    0.78 
 -11   0  -3    0.03    0.71 
  11   0  -3   -0.14    0.53 
  12   0  -3    7.08    1.12 
  12   0  -3    7.20    1.23 
  12   0   3    6.70    1.27 
 -12   0  -3    7.39    1.17 
   0  -1  -3  496.01   14.64 
   0  -1  -3  509.62   14.66 
   0   1   3  467.68   14.65 
   0   1   3  523.75   14.64 
  -2   1   3  320.53    9.05 
  -2  -1  -3  313.42    9.00 
  -2   1   3  304.19    8.93 
   2  -1   3  306.91    8.95 
   2   1  -3  317.06    9.01 
  -2   1   3  297.73    9.01 
   2   1  -3  309.71    8.95 
  -2  -1  -3  291.58    9.02 
   2  -1   3  294.01    8.93 
  -2  -1   3  287.68    8.99 
   2   1   3  312.19    9.02 
   2  -1  -3  301.22    8.97 
   2  -1  -3  309.47    9.00 
   2   1   3  306.12    8.95 
  -2  -1   3  320.14    8.95 
  -2   1  -3  282.36    9.01 
  -2   1  -3  285.00    8.94 
  -2   1  -3  314.19    8.97 
  -2   1  -3  304.89    8.93 
   2   1   3  293.67    8.99 
   3  -1   3   96.69    3.03 
   3   1  -3   96.16    3.05 
  -3  -1  -3   95.90    3.13 
  -3  -1  -3   98.05    3.05 
  -3  -1  -3   96.42    3.09 
   3   1  -3  105.29    3.25 
  -3   1   3   96.14    3.14 
  -3  -1  -3   98.31    3.07 
   3  -1   3  101.10    3.08 
  -3   1  -3   97.93    3.14 
   3   1   3  104.56    3.10 
  -3  -1   3  101.13    3.05 
   3  -1  -3   97.01    3.07 
   3   1   3  107.53    3.24 
  -3   1  -3   97.12    3.08 
   3   1   3   98.68    3.10 
  -3   1  -3   94.56    3.02 
  -3  -1   3   96.06    3.12 
   3  -1  -3  111.66    3.28 
  -4  -1  -3  106.03    3.28 
   4  -1   3  104.40    3.21 
   4   1  -3  108.09    3.24 
  -4  -1  -3  102.92    3.32 
   4  -1   3  102.16    3.25 
  -4   1   3  105.84    3.36 
  -4   1  -3  105.27    3.19 
   4   1   3  103.55    3.28 
  -4  -1   3  100.17    3.33 
  -4  -1   3  106.64    3.12 
  -4   1  -3  103.91    3.32 
  -4   1  -3  101.71    3.28 
   4  -1  -3  103.93    3.26 
  -5   1   3    2.94    0.46 
  -5  -1  -3    2.82    0.50 
   5   1  -3    3.32    0.38 
   5  -1   3    3.15    0.40 
   5  -1   3    2.57    0.41 
  -5  -1  -3    3.37    0.50 
   5  -1  -3    3.14    0.40 
  -5   1  -3    3.12    0.54 
  -5   1  -3    3.58    0.50 
   5   1   3    2.41    0.38 
  -5  -1   3    3.27    0.54 
  -5  -1   3    3.53    0.32 
   5   1   3    2.31    0.34 
  -5   1  -3    2.86    0.34 
  -6  -1  -3   36.66    1.48 
   6   1  -3   35.79    1.37 
   6  -1   3   36.13    1.36 
  -6   1   3   35.27    1.30 
   6  -1   3   36.55    1.41 
  -6  -1  -3   36.74    1.48 
  -6   1   3   33.88    1.65 
  -6   1  -3   36.28    1.48 
   6  -1  -3   35.95    1.39 
  -6  -1   3   37.90    1.27 
   6   1   3   36.92    1.38 
  -6   1  -3   36.69    1.51 
   6   1   3   36.29    1.44 
  -6  -1   3   35.18    1.68 
   7   1  -3    4.89    0.58 
  -7  -1  -3    4.56    0.64 
   7  -1   3    4.57    0.55 
   7  -1   3    5.31    0.60 
  -7   1   3    5.40    0.56 
  -7  -1  -3    4.95    0.74 
   7   1  -3    4.42    0.55 
  -7   1   3    4.30    0.80 
  -7  -1   3    4.75    0.78 
   7   1   3    6.25    0.70 
   7  -1  -3    4.35    0.54 
  -7   1  -3    4.97    0.72 
  -7  -1   3    5.55    0.52 
   7   1   3    4.75    0.56 
   8  -1   3    4.37    0.69 
  -8  -1  -3    5.10    0.77 
  -8   1   3    4.13    0.60 
  -8  -1  -3    4.89    0.80 
   8  -1   3    3.98    0.60 
   8   1  -3    5.59    0.60 
   8   1  -3    4.65    0.59 
   8   1   3    4.98    0.76 
   8  -1  -3    4.71    0.58 
  -8  -1   3    4.94    0.57 
  -8   1  -3    4.47    0.76 
   8  -1  -3    6.15    0.59 
  -8   1  -3    4.42    0.65 
   8   1   3    5.27    0.58 
   9   1  -3    0.07    0.29 
  -9   1   3    0.44    0.49 
   9   1  -3   -0.14    0.35 
   9  -1   3   -0.22    0.34 
  -9  -1  -3    0.73    0.54 
   9  -1   3    0.70    0.59 
  -9  -1  -3    0.16    0.43 
  -9   1  -3    0.03    0.52 
  -9   1  -3    0.23    0.45 
   9   1   3    0.14    0.37 
   9  -1  -3    0.30    0.30 
   9   1   3   -0.11    0.35 
  -9  -1   3   -0.25    0.43 
   9  -1  -3    0.27    0.38 
  10  -1   3    2.59    0.54 
 -10  -1  -3    3.12    0.71 
  10   1  -3    2.60    0.50 
 -10  -1  -3    3.15    0.72 
  10  -1   3    2.05    0.50 
 -10   1   3    2.39    0.77 
  10  -1  -3    1.82    0.53 
  10  -1  -3    2.36    0.44 
  10   1   3    1.85    0.51 
  10   1   3    2.08    0.51 
 -10   1  -3    2.78    0.65 
 -10  -1   3    2.75    0.60 
  11  -1   3    4.65    0.70 
  11  -1   3    5.57    0.95 
  11   1  -3    5.11    1.01 
 -11   1   3    4.27    0.78 
 -11   1   3    4.63    0.85 
  11   1  -3    3.30    0.72 
 -11  -1  -3    4.97    0.97 
  11  -1  -3    5.66    1.04 
 -11   1  -3    5.02    1.20 
  11  -1  -3    3.39    0.68 
 -11   1  -3    5.30    0.98 
  11   1   3    3.62    0.85 
  12   1  -3    2.85    0.68 
  12   1  -3    2.67    0.68 
 -12   1   3    6.28    1.81 
 -12  -1  -3    1.64    1.01 
 -12   1  -3    2.52    1.00 
  12  -1  -3    1.62    0.69 
  12   1   3    1.43    1.15 
  12  -1  -3    2.35    0.64 
   0   2   3  554.72   16.68 
   0  -2  -3  582.63   16.68 
   0  -2  -3  550.19   16.61 
   0   2   3  598.70   16.68 
   0  -2  -3  553.44   16.67 
  -1   2   3  325.62    9.26 
   1   2  -3  304.92    9.21 
  -1   2   3  298.76    9.25 
  -1   2   3  331.70    9.23 
  -1  -2  -3  315.30    9.28 
   1  -2   3  313.43    9.21 
  -1   2   3  299.31    9.27 
   1   2   3  326.67    9.29 
   1  -2  -3  324.02    9.25 
  -1   2  -3  314.10    9.19 
   1  -2  -3  319.59    9.23 
   1   2   3  296.03    9.28 
  -1   2  -3  301.79    9.21 
   1  -2  -3  299.84    9.25 
   1  -2  -3  324.96    9.28 
  -2   2   3   34.14    1.13 
  -2   2   3   32.07    1.19 
   2   2  -3   32.64    1.17 
   2   2  -3   32.02    1.09 
   2  -2   3   32.02    1.26 
   2  -2   3   34.51    1.05 
  -2   2   3   33.09    1.16 
  -2  -2  -3   31.66    1.16 
  -2  -2  -3   32.46    1.19 
   2   2   3   34.05    1.18 
   2  -2  -3   33.06    1.12 
  -2   2  -3   32.98    1.12 
  -2   2  -3   33.39    1.04 
  -2  -2   3   35.14    1.09 
  -2   2  -3   33.41    1.14 
   2  -2  -3   34.35    1.19 
   2   2   3   35.15    1.21 
  -3  -2  -3   15.46    0.71 
  -3  -2  -3   15.05    0.60 
   3   2  -3   15.03    0.59 
   3  -2   3   15.52    0.67 
  -3   2   3   15.18    0.76 
  -3  -2   3   13.69    0.59 
   3  -2  -3   13.49    0.61 
  -3   2  -3   13.30    0.68 
  -3   2  -3   13.71    0.70 
   3   2   3   14.49    0.69 
   3   2   3   14.12    0.66 
  -4   2   3   98.49    3.12 
   4  -2   3   97.17    2.91 
   4  -2   3   94.09    2.99 
   4   2  -3   94.09    2.95 
  -4  -2  -3   93.87    3.06 
   4  -2  -3   96.26    3.00 
  -4   2  -3   94.48    3.04 
  -4   2  -3   92.50    3.06 
  -4  -2   3   92.79    3.07 
   4   2   3   93.57    3.05 
  -4  -2   3   95.68    2.85 
  -4   2  -3   96.94    2.88 
  -5   2   3   76.17    2.66 
   5   2  -3   76.68    2.48 
   5  -2   3   78.87    2.54 
   5  -2   3   78.53    2.45 
  -5  -2  -3   77.63    2.60 
  -5   2  -3   76.60    2.60 
   5  -2  -3   76.36    2.53 
  -5   2  -3   75.39    2.60 
   5   2   3   79.37    2.60 
  -5  -2   3   77.21    2.37 
  -5  -2   3   76.88    2.64 
   6   2  -3   11.99    0.73 
   6   2  -3   12.86    0.70 
  -6  -2  -3   12.60    0.84 
   6  -2   3   12.86    0.69 
  -6   2  -3   12.38    0.90 
  -6   2  -3   12.82    0.86 
  -6  -2   3   13.19    0.61 
   6   2   3   12.20    0.83 
   6   2   3   12.98    0.72 
  -7   2   3   80.69    2.94 
   7   2  -3   81.50    2.77 
   7  -2   3   81.34    2.67 
  -7   2   3   79.23    2.67 
  -7  -2  -3   80.86    2.84 
   7  -2   3   81.04    2.75 
   7   2  -3   79.30    2.78 
   7   2   3   85.72    2.73 
  -7  -2   3   79.08    2.57 
   7  -2  -3   80.89    2.76 
  -7   2  -3   80.19    2.88 
  -7  -2   3   78.25    2.89 
  -7   2  -3   82.70    2.86 
   8  -2   3   12.41    0.82 
   8   2  -3   12.69    0.83 
   8   2  -3   12.89    0.80 
  -8   2   3   11.73    0.90 
   8  -2   3   11.78    0.82 
  -8  -2  -3   11.80    0.96 
   8   2   3   13.05    0.96 
  -8   2  -3   12.07    0.97 
   8  -2  -3   12.21    0.84 
  -8   2  -3   12.35    1.05 
  -8  -2   3   12.37    0.72 
   8   2   3   13.04    0.81 
   8  -2  -3   13.58    0.80 
   9  -2   3   12.51    0.97 
   9   2  -3   13.80    0.92 
  -9  -2  -3   13.91    1.00 
   9  -2   3   11.16    0.86 
  -9   2   3   12.45    0.94 
  -9   2  -3   12.45    1.11 
  -9   2  -3   12.73    1.03 
   9  -2  -3   13.55    0.91 
   9   2   3   13.51    1.00 
   9  -2  -3   13.32    0.86 
  -9  -2   3   12.29    0.80 
  10  -2   3    0.25    0.43 
 -10   2   3    0.20    0.59 
 -10  -2  -3   -0.49    0.59 
  10   2  -3    0.28    0.41 
  10   2  -3    0.54    0.40 
 -10   2   3    0.14    0.67 
 -10   2  -3    0.49    0.55 
  10  -2  -3    0.49    0.35 
 -10  -2   3    1.28    0.77 
 -10  -2   3    1.46    0.61 
  11  -2   3    2.45    0.62 
 -11   2   3    3.05    0.78 
  11   2  -3    2.17    1.08 
 -11   2   3    1.92    0.69 
 -11  -2  -3    3.05    0.82 
  11  -2   3    2.54    0.55 
  11   2  -3    2.69    0.60 
  11   2   3    1.52    0.61 
 -11   2  -3    2.08    0.97 
 -11   2  -3    2.68    0.82 
  11  -2  -3    2.55    0.62 
  12   2  -3   -0.55    0.59 
 -12   2   3    2.30    1.00 
  12   2  -3    0.69    0.57 
  12   2   3   -0.48    0.66 
 -12   2  -3    1.63    0.79 
 -12   2  -3   -0.92    0.94 
  12  -2  -3   -0.61    0.98 
   0   3   3   10.18    0.47 
   0   3   3   11.03    0.54 
   0   3   3   10.28    0.51 
   0  -3  -3   10.64    0.41 
   0  -3  -3    9.70    0.51 
   0  -3  -3   10.00    0.52 
  -1   3   3  706.88   19.64 
  -1  -3  -3  681.65   19.65 
  -1   3   3  642.26   19.62 
  -1   3   3  631.37   19.62 
  -1  -3  -3  635.36   19.65 
  -1   3   3  698.37   19.58 
   1   3  -3  650.58   19.54 
   1  -3  -3  697.54   19.63 
   1   3   3  689.88   19.66 
   1  -3  -3  695.37   19.67 
  -1   3  -3  632.24   19.59 
   1  -3  -3  673.32   19.58 
   1   3   3  659.14   19.65 
   1  -3  -3  666.59   19.64 
  -2   3   3  145.36    4.32 
  -2   3   3  136.73    4.28 
  -2  -3  -3  148.44    4.47 
   2  -3   3  143.21    4.31 
  -2  -3  -3  138.11    4.36 
   2   3  -3  139.25    4.24 
  -2   3   3  135.51    4.53 
   2   3  -3  143.86    4.22 
  -2   3  -3  146.51    4.29 
   2   3   3  145.46    4.38 
   2  -3  -3  142.97    4.32 
   2  -3  -3  141.27    4.37 
  -2  -3   3  147.12    4.24 
  -2   3  -3  138.27    4.31 
   2   3   3  139.39    4.36 
   2  -3  -3  141.02    4.34 
  -3   3   3  128.79    4.12 
   3  -3   3  127.57    4.04 
  -3  -3  -3  140.15    4.09 
   3  -3   3  132.53    4.12 
   3   3  -3  129.27    3.98 
   3   3  -3  134.93    3.93 
  -3   3   3  133.71    4.12 
  -3  -3  -3  131.79    4.11 
  -3   3  -3  130.00    4.07 
   3  -3  -3  127.97    4.04 
   3   3   3  129.31    4.12 
   3   3   3  136.91    4.17 
  -3  -3   3  128.97    3.92 
  -3  -3   3  139.16    4.01 
   4   3  -3   23.37    0.88 
   4   3  -3   21.01    0.94 
   4  -3   3   23.49    0.93 
   4   3  -3   24.83    0.81 
  -4   3   3   24.78    1.12 
   4  -3   3   23.22    0.80 
  -4  -3  -3   23.26    1.01 
   4   3   3   22.69    1.01 
   4  -3  -3   23.95    0.94 
  -4   3  -3   24.25    1.04 
  -4  -3   3   24.28    0.80 
   5  -3   3    1.50    0.30 
   5   3  -3    2.24    0.29 
   5   3  -3    2.45    0.37 
  -5  -3  -3    2.52    0.46 
   5   3  -3    1.64    0.27 
  -5   3   3    1.87    0.46 
   5  -3   3    1.69    0.32 
  -5   3  -3    1.65    0.41 
   5  -3  -3    1.57    0.29 
   5   3   3    1.62    0.35 
  -5   3  -3    1.40    0.41 
  -5  -3   3    2.11    0.29 
  -6   3   3    9.46    0.95 
   6  -3   3    8.78    0.52 
   6  -3   3    8.08    0.60 
  -6  -3  -3    7.61    0.75 
   6   3  -3    8.14    0.56 
   6  -3  -3    7.42    0.61 
   6   3   3    8.35    0.78 
  -6   3  -3    8.11    0.76 
  -6   3  -3    8.49    0.87 
  -6  -3   3    8.05    0.49 
  -7   3   3   12.80    1.12 
   7  -3   3   13.53    0.80 
   7  -3   3   13.31    0.73 
   7   3  -3   11.85    0.79 
   7  -3  -3   11.58    0.80 
  -7  -3   3   12.71    0.66 
  -7   3  -3   13.00    1.07 
  -7   3  -3   13.25    0.96 
   7   3   3   13.26    0.98 
   8   3  -3    3.44    0.54 
   8   3  -3    4.27    0.61 
  -8  -3  -3    4.40    0.69 
  -8   3   3    4.20    0.69 
   8  -3   3    3.14    0.59 
  -8   3  -3    4.12    0.78 
   8   3   3    4.09    0.75 
  -8   3  -3    3.34    0.63 
  -8  -3   3    4.79    0.53 
   9  -3   3   11.52    0.88 
  -9  -3  -3   12.60    1.00 
  -9   3   3   11.19    1.13 
   9   3  -3   11.65    0.83 
  -9  -3   3   12.04    0.80 
   9  -3  -3   15.17    0.86 
   9   3   3   13.28    1.07 
  -9   3  -3   13.32    1.18 
  -9   3  -3   11.68    1.03 
  10  -3   3    1.46    0.65 
  10  -3   3    1.73    0.55 
 -10   3   3    2.28    0.63 
  10   3  -3    1.43    0.47 
 -10  -3  -3    2.33    0.70 
 -10   3   3    1.76    0.64 
  10   3  -3    1.73    0.48 
 -10   3  -3    1.75    0.89 
  10  -3  -3    2.09    0.42 
  10  -3  -3    1.74    0.53 
 -10   3  -3    2.65    0.78 
  10   3   3    0.97    0.72 
 -11   3   3    4.94    0.85 
 -11  -3  -3    5.73    1.04 
 -11   3   3    5.13    0.90 
  11   3  -3    5.80    0.91 
  11  -3   3    5.39    0.96 
  11  -3   3    6.54    0.96 
  11   3  -3    4.75    0.74 
  11  -3  -3    6.64    0.98 
 -11   3  -3    6.08    0.99 
  12   3  -3    0.81    0.62 
 -12   3   3    1.81    0.84 
  12   3  -3    1.86    0.64 
 -12   3  -3    1.42    1.04 
  12  -3  -3   -0.12    0.69 
 -12   3  -3    2.46    0.83 
  12   3   3   -0.18    0.74 
  12  -3  -3    0.88    0.54 
   0  -4  -3   11.14    0.57 
   0   4   3   11.07    0.55 
   0   4   3   10.87    0.54 
   0   4   3   10.89    0.60 
   0  -4  -3   11.02    0.44 
  -1   4   3   63.17    2.04 
   1   4  -3   61.79    1.87 
  -1  -4  -3   58.62    2.03 
  -1  -4  -3   67.88    2.15 
  -1   4   3   62.01    1.99 
  -1   4   3   58.87    2.00 
  -1   4   3   62.84    1.92 
   1  -4  -3   59.23    2.02 
   1  -4  -3   63.09    2.00 
  -1   4  -3   58.20    1.97 
  -1   4  -3   62.41    1.91 
   1  -4  -3   59.97    2.00 
   1  -4  -3   60.96    1.92 
  -2   4   3   34.00    1.15 
  -2  -4  -3   33.03    1.24 
  -2   4   3   34.13    1.24 
   2   4  -3   31.46    1.16 
   2  -4   3   33.71    1.20 
   2   4  -3   34.35    1.11 
   2   4  -3   33.16    1.07 
   2   4   3   32.40    1.24 
  -2   4  -3   33.55    1.14 
  -2   4  -3   32.21    1.19 
   2  -4  -3   32.61    1.14 
   2  -4  -3   33.45    1.19 
   3   4  -3    5.34    0.34 
  -3  -4  -3    4.84    0.48 
  -3  -4  -3    5.46    0.34 
   3   4  -3    5.19    0.32 
   3   4  -3    5.37    0.41 
  -3   4   3    5.39    0.55 
   3  -4   3    5.07    0.39 
  -3  -4   3    5.97    0.34 
   3   4   3    5.61    0.53 
   3  -4  -3    4.83    0.40 
  -3   4  -3    6.06    0.51 
   3  -4  -3    5.59    0.46 
  -4   4   3   22.75    1.11 
   4   4  -3   23.44    0.99 
   4   4  -3   24.34    0.85 
  -4  -4  -3   22.85    1.02 
   4   4  -3   23.19    0.86 
   4  -4   3   23.86    0.95 
   4   4   3   22.43    1.06 
  -4  -4   3   26.13    0.98 
   4  -4  -3   21.91    0.94 
  -4  -4   3   24.08    0.84 
  -4   4  -3   22.58    1.05 
  -5  -4  -3   32.74    1.35 
   5   4  -3   31.67    1.17 
   5   4  -3   33.55    1.13 
   5   4  -3   31.69    1.31 
   5  -4   3   33.14    1.28 
  -5   4   3   32.10    1.47 
   5   4   3   33.46    1.40 
   5  -4  -3   32.01    1.27 
  -5   4  -3   33.04    1.41 
  -5  -4   3   32.74    1.12 
   6   4  -3   36.64    1.27 
   6   4  -3   36.43    1.49 
   6  -4   3   36.96    1.25 
  -6  -4  -3   36.49    1.53 
   6   4  -3   37.24    1.35 
   6  -4   3   38.67    1.44 
  -6   4   3   37.17    1.70 
  -6   4  -3   35.99    1.63 
  -6  -4   3   35.49    1.26 
   6  -4  -3   34.83    1.43 
  -6   4  -3   34.54    1.59 
   6   4   3   38.35    1.75 
   7  -4   3   35.56    1.28 
   7   4  -3   35.92    1.52 
   7  -4   3   34.96    1.45 
  -7   4   3   36.03    1.72 
   7   4  -3   32.94    1.45 
   7   4   3   37.16    1.60 
  -7  -4   3   35.07    1.27 
  -7   4  -3   32.60    1.55 
  -7   4  -3   35.48    1.66 
   7  -4  -3   33.96    1.44 
   8   4  -3    8.76    0.72 
   8  -4   3    9.54    0.70 
  -8  -4  -3   11.67    0.90 
   8   4  -3   10.61    0.83 
   8   4   3    9.03    0.91 
  -8  -4   3    9.73    0.65 
  -8   4  -3    9.01    0.90 
  -8   4  -3    9.98    1.05 
  -9   4   3    1.62    0.59 
   9  -4   3    0.56    0.38 
   9   4  -3    0.59    0.40 
  -9  -4  -3    0.62    0.56 
   9  -4  -3    1.07    0.34 
  -9   4  -3    0.95    0.57 
  -9  -4   3    1.89    0.48 
  10  -4   3    5.84    0.86 
 -10   4   3    6.96    0.88 
  10  -4   3    6.64    0.81 
 -10   4   3    5.73    0.92 
 -10  -4  -3    7.89    0.98 
  10   4  -3    6.39    0.79 
 -10   4  -3    7.43    1.14 
  10  -4  -3    7.97    0.75 
  10   4   3    5.38    0.79 
  10  -4  -3    6.20    0.88 
  11  -4   3    1.67    0.56 
 -11   4   3    0.98    0.70 
 -11  -4  -3    1.36    0.75 
 -11   4   3    1.93    0.74 
  11   4  -3    1.10    0.56 
 -11   4  -3    0.73    0.68 
  11  -4  -3    1.35    0.59 
 -11   4  -3    0.63    0.86 
  11  -4  -3    1.99    0.45 
  11   4   3    0.45    0.63 
  12   4  -3    4.01    0.71 
 -12  -4  -3    4.62    1.34 
  12   4  -3    3.31    0.82 
 -12   4   3    3.57    0.96 
  12   4   3    4.01    0.87 
  12  -4  -3    4.82    0.85 
  12  -4  -3    3.42    0.71 
 -12   4  -3    3.38    2.05 
   0   5  -3  233.56    7.07 
   0   5   3  233.40    7.17 
   0   5   3  244.71    7.17 
   0  -5  -3  243.61    7.03 
   0  -5  -3  234.56    7.20 
  -1   5   3   11.87    0.59 
  -1  -5  -3   12.19    0.46 
  -1   5   3   11.52    0.63 
   1   5  -3   12.00    0.58 
  -1   5   3   11.61    0.51 
   1   5  -3   10.97    0.53 
  -1  -5  -3   11.67    0.65 
  -1   5  -3   11.81    0.46 
  -1   5  -3   12.22    0.54 
  -1   5  -3   11.75    0.60 
   1  -5  -3   12.34    0.64 
   1  -5  -3   12.36    0.65 
   1  -5  -3   12.39    0.59 
  -2   5   3  197.68    6.10 
   2   5  -3  209.00    6.00 
  -2   5   3  202.85    6.04 
  -2  -5  -3  195.78    6.10 
   2   5  -3  200.49    5.90 
   2   5  -3  182.35    6.03 
  -2   5  -3  199.40    6.07 
   2   5   3  200.25    6.12 
   2  -5  -3  199.52    5.99 
   2  -5  -3  209.24    6.04 
  -3   5   3  135.34    4.33 
   3   5  -3  140.98    4.15 
   3   5  -3  126.03    4.24 
  -3  -5  -3  131.09    4.29 
  -3  -5  -3  141.13    4.11 
   3   5  -3  132.51    4.09 
  -3   5  -3  135.57    4.28 
   3  -5  -3  138.39    4.20 
   3   5   3  134.10    4.32 
   3  -5  -3  142.37    4.23 
  -3  -5   3  144.83    4.10 
   4  -5   3   18.68    0.84 
   4   5  -3   17.10    0.88 
   4   5  -3   19.61    0.75 
   4   5  -3   21.29    0.82 
  -4  -5  -3   20.05    0.96 
  -4   5   3   19.58    1.05 
  -4  -5  -3   19.03    0.79 
  -4  -5   3   19.82    0.77 
  -4  -5   3   19.57    0.76 
  -4   5  -3   20.07    1.00 
   4   5   3   20.76    1.01 
   4  -5  -3   19.58    0.86 
   5   5  -3    0.90    0.22 
  -5  -5  -3    0.94    0.44 
   5  -5   3    0.40    0.28 
   5   5  -3    1.03    0.32 
  -5   5  -3    0.68    0.43 
   5   5   3    0.69    0.43 
   5  -5  -3    0.46    0.29 
  -5  -5   3    0.57    0.27 
   6   5  -3   16.39    0.93 
   6  -5   3   15.85    0.87 
   6   5  -3   16.74    0.77 
  -6  -5  -3   15.69    1.03 
  -6   5   3   16.98    1.20 
   6   5  -3   15.00    0.76 
   6  -5  -3   17.10    0.88 
   6   5   3   18.04    1.06 
  -6   5  -3   15.36    1.34 
  -6  -5   3   15.93    0.74 
   7   5  -3   38.60    1.46 
   7   5  -3   38.36    1.64 
   7  -5   3   38.12    1.55 
  -7  -5  -3   37.85    1.66 
  -7   5  -3   37.04    1.71 
   7   5   3   40.38    1.74 
  -7  -5   3   38.43    1.38 
   7  -5  -3   37.63    1.55 
  -7   5  -3   38.27    1.78 
   8  -5   3    0.13    0.27 
   8   5  -3    0.15    0.33 
  -8  -5  -3   -0.48    0.46 
  -8   5  -3    0.13    0.49 
  -8  -5   3    0.92    0.41 
  -8   5  -3    0.33    0.54 
   8   5   3    0.13    0.41 
   9  -5   3    4.25    0.66 
   9   5  -3    4.96    0.83 
   9   5  -3    4.17    0.52 
  -9  -5  -3    5.60    0.84 
  -9  -5   3    5.39    0.68 
   9   5   3    4.27    0.86 
  -9   5  -3    4.90    0.78 
 -10   5   3    4.77    0.90 
  10  -5   3    6.32    0.87 
  10   5  -3    5.99    0.76 
  10   5  -3    6.17    0.99 
 -10   5   3    5.42    0.97 
 -10   5  -3    7.26    1.12 
  10  -5  -3    5.92    0.87 
  10  -5  -3    6.38    0.79 
 -11  -5  -3    1.21    0.75 
  11   5  -3   -0.52    0.52 
 -11   5   3   -0.27    0.71 
  11  -5   3   -0.26    0.57 
  11   5  -3    0.91    0.62 
 -11   5  -3   -1.11    0.89 
 -11   5  -3    0.51    0.70 
  11  -5  -3   -0.76    0.56 
  11  -5  -3    0.07    0.39 
  11   5   3    0.36    0.64 
   0  -6  -3    0.17    0.14 
   0   6   3   -0.21    0.21 
   0   6  -3    0.15    0.13 
   0   6   3    0.46    0.22 
   0  -6  -3    0.08    0.28 
   0   6  -3    0.37    0.14 
  -1   6   3   73.00    2.40 
  -1  -6  -3   73.17    2.24 
  -1   6   3   72.97    2.46 
  -1  -6  -3   69.75    2.46 
   1   6  -3   70.60    2.36 
  -1   6   3   74.13    2.29 
  -1   6  -3   72.37    2.43 
  -1   6  -3   77.17    2.29 
   1  -6  -3   75.26    2.30 
  -1   6  -3   77.23    2.29 
  -2   6   3    6.15    0.48 
  -2  -6  -3    6.14    0.57 
   2   6  -3    6.36    0.30 
   2   6  -3    7.00    0.48 
   2   6  -3    6.84    0.51 
  -2   6   3    6.32    0.59 
   2   6   3    6.35    0.60 
   2  -6  -3    6.52    0.42 
  -2   6  -3    6.91    0.56 
   3   6  -3   31.13    1.14 
  -3  -6  -3   29.49    1.25 
   3   6  -3   30.37    0.99 
  -3   6   3   31.20    1.31 
  -3  -6  -3   31.79    1.02 
   3   6  -3   29.23    1.21 
   3  -6  -3   29.98    1.12 
  -3   6  -3   29.96    1.26 
   3   6   3   29.27    1.29 
  -4  -6  -3   44.21    1.75 
   4   6  -3   48.74    1.62 
  -4   6   3   47.31    1.88 
   4   6  -3   45.85    1.51 
  -4  -6  -3   46.91    1.54 
   4  -6   3   45.19    1.64 
   4   6  -3   47.43    1.76 
   4   6   3   47.83    1.86 
  -4  -6   3   49.06    1.53 
   4  -6  -3   46.99    1.66 
  -4   6  -3   46.55    1.79 
   5   6  -3   10.86    0.76 
   5   6  -3   11.56    0.68 
  -5   6   3   10.46    0.98 
  -5  -6  -3   10.80    0.82 
   5   6  -3   11.10    0.55 
  -5  -6   3   10.19    0.60 
  -5   6  -3    9.54    0.96 
   5   6   3   12.13    0.90 
  -6   6   3   68.35    2.66 
   6   6  -3   68.73    2.52 
   6  -6   3   68.20    2.42 
   6   6  -3   69.66    2.28 
  -6  -6   3   69.86    2.29 
  -6   6  -3   69.55    2.62 
   6  -6  -3   71.19    2.44 
   6   6   3   72.56    2.62 
   7  -6   3   18.46    1.01 
   7   6  -3   19.02    0.92 
  -7  -6  -3   19.53    1.15 
   7   6   3   19.97    1.23 
  -7   6  -3   20.43    1.33 
  -7  -6   3   20.10    0.92 
   7  -6  -3   20.40    1.05 
   8   6  -3    9.38    0.72 
  -8  -6  -3    9.74    0.92 
  -8  -6   3    9.78    0.71 
  -8   6  -3    8.47    1.07 
   9  -6   3   12.47    1.13 
  -9  -6  -3   15.15    1.24 
   9   6  -3   13.73    0.87 
   9   6  -3   14.09    1.14 
   9  -6  -3   15.28    1.24 
  -9   6  -3   15.25    1.26 
  -9  -6   3   15.12    0.89 
   9   6   3   14.93    1.28 
  -9   6  -3   14.26    1.31 
  10  -6   3    2.46    0.62 
  10   6  -3    1.45    0.47 
 -10   6   3    0.42    0.66 
  10   6  -3    1.10    0.54 
 -10   6  -3    3.12    1.13 
  10  -6  -3    2.11    0.41 
  10  -6  -3    2.62    0.60 
  10   6   3    1.14    0.62 
  11   6  -3    2.19    0.59 
 -11  -6  -3    2.14    0.82 
 -11   6   3    3.79    0.94 
  11  -6   3    3.22    0.79 
  11   6  -3    2.21    0.70 
 -11   6   3    2.76    1.00 
 -11   6  -3    3.16    1.10 
 -11   6  -3    3.69    0.85 
  11  -6  -3    2.84    0.74 
  11   6   3    1.78    0.77 
   0  -7  -3  166.17    5.39 
   0  -7  -3  173.81    5.14 
   0   7  -3  179.66    5.13 
   0   7  -3  175.54    5.26 
   0   7   3  166.85    5.36 
   0   7   3  172.06    5.34 
  -1  -7  -3   17.64    0.61 
  -1   7   3   16.55    0.89 
  -1   7   3   16.96    0.81 
   1   7  -3   17.57    0.59 
  -1   7   3   16.44    0.68 
  -1  -7  -3   16.18    0.88 
   1   7  -3   16.16    0.76 
  -1   7  -3   16.10    0.85 
  -1   7  -3   17.29    0.68 
  -1   7  -3   17.91    0.68 
   1  -7  -3   17.53    0.67 
  -2   7   3   33.58    1.39 
   2   7  -3   33.49    1.30 
  -2   7   3   34.14    1.28 
  -2  -7  -3   32.01    1.37 
  -2  -7  -3   34.88    1.09 
   2   7   3   34.63    1.41 
   2  -7  -3   34.26    1.20 
  -2   7  -3   34.40    1.38 
   3   7  -3   10.60    0.43 
  -3  -7  -3   10.77    0.46 
  -3   7   3   10.87    0.86 
  -3  -7  -3    9.65    0.74 
   3   7  -3   10.24    0.67 
   3   7   3   10.48    0.83 
   3  -7  -3   10.88    0.58 
  -3   7  -3   11.32    0.79 
   4   7  -3   13.27    0.54 
  -4  -7  -3   13.56    0.59 
   4  -7   3   11.91    0.68 
  -4  -7  -3   12.16    0.87 
  -4   7   3   13.08    0.98 
   4  -7  -3   12.34    0.72 
  -4   7  -3   13.32    0.98 
   4   7   3   12.24    0.93 
  -5   7   3    9.24    1.03 
   5  -7   3    7.67    0.67 
   5   7  -3    8.33    0.49 
   5   7  -3    9.07    0.73 
   5   7   3    8.04    0.86 
  -5  -7   3    9.19    0.92 
   5  -7  -3    8.97    0.69 
  -5   7  -3    9.38    0.98 
  -5  -7   3    8.32    0.60 
   6   7  -3   17.64    1.06 
  -6  -7  -3   17.83    1.09 
   6  -7   3   17.58    0.94 
  -6   7   3   16.99    1.51 
   6   7  -3   17.94    0.80 
   6   7   3   19.09    1.16 
  -6  -7   3   18.21    0.89 
   6  -7  -3   18.47    0.97 
  -6   7  -3   17.84    1.26 
  -7  -7  -3   23.21    1.22 
   7  -7   3   24.92    1.17 
   7   7  -3   24.49    1.02 
  -7  -7   3   24.72    1.06 
  -7   7  -3   22.49    1.42 
   7  -7  -3   23.85    1.18 
   7   7   3   18.98    1.33 
   8  -7   3    1.54    0.49 
   8   7  -3    1.82    0.74 
  -8  -7  -3    2.73    0.65 
   8  -7  -3    2.34    0.50 
   8   7   3    1.49    0.53 
  -8   7  -3    2.16    0.67 
   9   7  -3    0.31    0.38 
  -9  -7  -3    1.31    0.63 
   9  -7   3    0.76    0.54 
   9   7  -3    0.16    0.44 
  -9   7   3    1.41    0.68 
  -9  -7   3    1.50    0.56 
   9  -7  -3    0.78    0.37 
  -9   7  -3    1.05    0.64 
  -9   7  -3    0.32    0.74 
   9  -7  -3    1.08    0.53 
  10   7  -3    2.78    0.54 
  10   7  -3    1.36    0.58 
 -10   7   3    1.06    0.79 
  10  -7   3    2.15    0.58 
  10  -7  -3    2.57    0.63 
  10   7   3    1.20    0.68 
 -10   7  -3    3.74    0.98 
  10  -7  -3    1.83    0.47 
 -11   7   3    2.01    1.21 
  11   7  -3   -0.45    1.24 
  11  -7   3    0.83    0.95 
 -11  -7  -3    2.01    0.95 
  11   7  -3    0.77    0.55 
 -11   7   3    0.05    1.61 
 -11   7  -3    0.77    0.80 
  11  -7  -3    0.59    0.98 
 -11   7  -3    1.89    1.07 
  11   7   3   -0.21    0.75 
   0  -8  -3   11.28    0.81 
   0  -8  -3   11.14    0.49 
   0   8  -3   11.64    0.64 
   0   8   3   10.90    0.78 
   0   8  -3   12.94    0.49 
   0   8   3   10.94    0.75 
  -1  -8  -3   20.68    1.07 
  -1   8   3   21.37    0.81 
  -1  -8  -3   20.56    0.70 
   1   8  -3   21.20    0.94 
  -1   8   3   19.65    0.94 
  -1   8   3   19.79    1.05 
   1  -8  -3   20.03    0.78 
  -1   8  -3   20.25    0.81 
  -1   8  -3   20.40    1.02 
  -1   8  -3   19.32    0.80 
  -2  -8  -3    1.79    0.21 
  -2  -8  -3    2.80    0.53 
  -2   8   3    1.63    0.44 
   2   8  -3    1.85    0.32 
  -2   8   3    1.78    0.32 
   2  -8  -3    2.13    0.28 
   2   8   3    1.68    0.40 
  -2   8  -3    1.91    0.42 
  -3  -8  -3    9.75    0.84 
  -3  -8  -3   10.99    0.46 
   3   8  -3   11.09    0.78 
  -3   8   3   10.94    0.93 
   3  -8  -3    9.91    0.62 
  -3   8  -3   10.54    0.88 
   3   8   3   10.67    0.90 
   4   8  -3   80.33    2.45 
  -4  -8  -3   81.28    2.49 
   4   8  -3   82.52    2.84 
  -4  -8  -3   78.10    3.05 
  -4   8   3   79.14    2.91 
   4   8   3   84.05    2.92 
  -4   8  -3   81.22    2.87 
   4  -8  -3   78.32    2.83 
   5  -8   3   27.26    1.20 
  -5  -8  -3   28.76    1.09 
  -5  -8  -3   28.44    1.39 
  -5   8   3   28.87    1.52 
   5   8  -3   27.95    1.00 
   5   8  -3   28.69    1.35 
  -5  -8   3   26.58    1.02 
  -5   8  -3   28.17    1.48 
   5   8   3   27.95    1.46 
   5  -8  -3   28.87    1.24 
  -6  -8  -3    9.08    0.88 
   6   8  -3    9.70    0.57 
   6   8  -3   10.66    0.84 
   6  -8   3    7.80    0.71 
  -6   8  -3    9.16    1.04 
   6  -8  -3    8.73    0.74 
  -6  -8   3    9.44    0.70 
   7  -8   3   15.12    1.08 
  -7  -8  -3   17.12    1.04 
   7   8  -3   15.64    0.80 
  -7  -8   3   16.81    0.92 
   7  -8  -3   13.72    1.10 
  -7   8  -3   15.18    1.27 
   8   8  -3    4.57    0.68 
  -8  -8  -3    3.42    0.70 
   8  -8   3    2.84    0.57 
  -8   8  -3    2.76    0.73 
   8   8   3    2.36    0.64 
  -8  -8   3    4.17    0.63 
   8  -8  -3    3.67    0.58 
   9   8  -3    6.47    0.73 
   9   8  -3    7.18    1.07 
   9  -8   3    7.63    0.88 
  -9   8   3    5.09    0.94 
   9   8   3    7.40    1.30 
  -9   8  -3    6.28    1.12 
  -9   8  -3    7.48    1.35 
   9  -8  -3    7.47    0.94 
  10   8  -3    7.01    1.27 
 -10  -8  -3    9.90    1.21 
  10  -8   3    9.32    1.10 
 -10   8   3    8.28    1.55 
  10   8  -3    9.01    0.83 
 -10   8  -3    8.01    1.49 
 -10   8  -3    8.52    1.52 
  10  -8  -3    7.41    1.07 
  10   8   3    6.06    0.97 
  11   8  -3    3.13    0.72 
  11   8  -3    3.43    1.05 
  11   8   3    0.91    0.84 
  11  -8  -3    2.78    0.81 
   0  -9  -3   30.09    1.03 
   0   9  -3   30.19    1.21 
   0   9   3   30.75    1.32 
   0   9  -3   30.41    1.02 
  -1   9   3   28.70    1.40 
  -1  -9  -3   30.41    1.42 
   1   9  -3   29.62    1.26 
  -1   9   3   29.18    1.26 
  -1   9  -3   29.59    1.07 
   1  -9  -3   29.32    1.05 
  -1   9  -3   29.92    1.12 
   1   9   3   29.35    1.36 
  -2   9   3   39.79    1.52 
   2   9  -3   41.16    1.61 
  -2  -9  -3   38.59    1.66 
  -2   9   3   41.60    1.72 
  -2   9  -3   39.40    1.33 
   2  -9  -3   38.67    1.39 
   2   9   3   38.12    1.87 
  -2   9  -3   38.60    1.80 
  -3  -9  -3    2.02    0.56 
  -3   9   3    1.91    0.49 
  -3   9   3    1.76    0.33 
   3   9  -3    2.14    0.42 
   3  -9  -3    2.18    0.35 
  -3   9  -3    2.11    0.50 
   3   9   3    1.97    0.46 
  -4   9   3   27.10    1.47 
  -4  -9  -3   25.52    1.32 
   4   9  -3   27.39    1.33 
  -4   9  -3   29.20    1.44 
   4   9   3   26.40    1.41 
   4  -9  -3   25.18    1.18 
   5  -9   3    4.01    0.62 
   5   9  -3    5.34    0.79 
  -5  -9  -3    5.74    0.49 
  -5  -9  -3    6.02    0.81 
   5  -9  -3    4.44    0.63 
   5   9   3    5.60    0.87 
  -5   9  -3    5.94    0.94 
   6  -9   3    7.51    0.69 
   6   9  -3    7.58    0.84 
   6   9  -3    6.98    0.50 
  -6  -9  -3    7.76    0.83 
  -6   9  -3    7.03    1.05 
   6  -9  -3    7.67    0.72 
   7   9  -3   -0.21    0.35 
   7   9  -3    0.24    0.32 
  -7  -9  -3    0.97    0.57 
  -7   9  -3    0.25    0.59 
  -8   9   3    2.76    0.79 
   8  -9   3    2.43    0.56 
  -8  -9  -3    2.79    0.84 
   8   9  -3    1.93    0.52 
  -8   9  -3    1.85    0.73 
   8  -9  -3    2.43    0.56 
   8   9   3    1.52    0.65 
  -9   9   3    1.28    0.77 
  -9  -9  -3    2.98    0.94 
   9   9  -3    0.41    0.51 
   9  -9   3    1.75    0.60 
   9   9  -3    1.07    0.49 
   9  -9  -3    1.15    0.53 
  -9   9  -3    1.22    0.88 
   9   9   3    0.04    0.66 
 -10  -9  -3    2.23    0.91 
  10   9  -3    1.70    1.09 
  10  -9  -3    0.65    0.64 
 -10   9  -3    1.41    0.80 
  10   9   3    1.23    0.79 
 -10   9  -3    3.45    1.16 
   0  10  -3    0.40    0.28 
   0  10  -3    0.13    0.31 
   0  10  -3    0.01    0.34 
   0  10   3    0.57    0.38 
   0  10   3    0.16    0.36 
   0 -10  -3    0.54    0.20 
   1  10  -3   20.02    1.01 
  -1  10   3   19.13    1.03 
  -1 -10  -3   19.68    1.11 
  -1  10   3   19.25    1.15 
   1  10   3   18.89    1.28 
  -1  10  -3   19.55    0.81 
  -1  10  -3   18.92    1.12 
   1 -10  -3   18.68    0.78 
  -1  10  -3   19.37    0.89 
   1  10   3   18.99    1.12 
   2  10  -3    9.67    1.30 
  -2  10   3    9.02    0.93 
  -2 -10  -3    8.27    0.83 
  -2  10   3    8.35    0.73 
   2  10   3    7.62    0.83 
  -2  10  -3    8.20    0.53 
  -2  10  -3    7.93    0.85 
   2 -10  -3    7.42    0.54 
  -3 -10  -3   12.20    0.94 
  -3  10   3   12.93    0.84 
   3  10  -3   14.44    0.96 
  -3  10   3   12.55    1.04 
   3 -10  -3   12.23    0.73 
  -3  10  -3   12.39    1.01 
   3  10   3   11.65    0.96 
  -4 -10  -3   15.41    1.03 
   4  10  -3   16.42    1.04 
   4  10   3   14.57    1.14 
   4 -10  -3   15.83    1.04 
  -4  10  -3   15.59    1.17 
  -5 -10  -3    7.98    0.86 
   5  10  -3    8.73    0.88 
  -5  10  -3    9.15    1.06 
   5 -10  -3    7.52    0.70 
   5  10   3    7.61    0.96 
   6  10  -3   10.32    1.09 
  -6 -10  -3   10.32    0.95 
   6 -10  -3    8.77    0.79 
  -6  10  -3   10.14    1.19 
   7  10  -3   10.02    1.63 
  -7 -10  -3    9.73    1.13 
  -7  10  -3   11.40    1.34 
   7 -10  -3    9.84    1.17 
   8  10  -3    3.09    0.64 
  -8  10   3    2.85    0.83 
   8  10   3    3.04    0.71 
  -8  10  -3    2.64    0.82 
   8 -10  -3    5.03    1.09 
  -9 -10  -3    4.36    0.94 
  -9  10   3    3.12    0.96 
   9  10  -3    2.18    0.69 
   9  10   3    2.37    0.75 
   9 -10  -3    3.62    0.74 
 -10 -10  -3    5.13    1.10 
 -10  10   3    1.94    0.99 
  10  10  -3    2.49    0.77 
  10  10   3    3.34    0.87 
 -10  10  -3   -0.02    1.70 
   0  11  -3   31.51    1.51 
   0  11  -3   30.80    1.35 
   0 -11  -3   31.39    1.09 
   0  11   3   33.61    1.55 
   0  11   3   34.69    1.52 
  -1  11   3   12.98    0.96 
  -1  11   3   13.21    1.05 
   1  11  -3   12.10    0.93 
   1 -11  -3   12.73    0.64 
  -1  11  -3   12.86    0.88 
   1  11   3   12.64    0.98 
  -1  11  -3   14.39    0.68 
  -1  11  -3   14.53    1.00 
  -2 -11  -3   10.19    0.92 
   2  11  -3    9.77    0.90 
  -2  11   3    9.82    0.82 
  -2  11   3    9.89    0.97 
  -2  11  -3    7.76    0.80 
  -2  11  -3   10.40    0.95 
   2 -11  -3    7.61    0.60 
  -3 -11  -3   32.93    1.60 
   3  11  -3   39.65    1.84 
  -3  11   3   32.04    1.42 
  -3  11  -3   32.59    1.67 
   3  11   3   35.27    1.85 
   3 -11  -3   31.81    1.32 
  -4 -11  -3    5.11    0.86 
   4  11  -3    2.94    0.52 
  -4  11  -3    3.55    0.67 
   4  11   3    4.85    0.87 
   4 -11  -3    4.51    0.66 
   5  11  -3    0.34    0.43 
  -5 -11  -3    0.90    0.60 
   5  11   3    0.43    0.51 
  -5  11  -3    0.74    0.58 
   5 -11  -3    1.52    0.42 
   6  11  -3    3.59    0.61 
   6 -11  -3    4.33    0.69 
  -6  11  -3    3.75    0.81 
   6  11   3    5.45    1.03 
  -7  11   3   -0.02    0.67 
   7  11  -3    0.17    0.49 
  -7 -11  -3    1.04    0.87 
   7  11   3    0.97    0.59 
   7 -11  -3    0.85    0.50 
  -8  11   3    0.43    0.79 
  -8 -11  -3    0.83    0.77 
   8  11  -3    0.16    0.56 
  -8  11  -3    0.53    0.69 
   8  11   3   -0.04    0.59 
   8 -11  -3   -0.34    0.53 
  -9 -11  -3    0.67    1.15 
   9 -11  -3    1.18    0.67 
   9  11   3   -0.79    1.29 
   0  12  -3    1.58    0.38 
   0  12  -3    1.20    0.45 
   0  12   3    1.41    0.40 
   0  12   3    1.15    0.46 
   1  12  -3   20.16    1.17 
  -1  12   3   20.57    1.14 
  -1  12   3   17.55    1.35 
   1  12   3   19.39    1.23 
   1  12   3   22.00    1.21 
  -1  12  -3   21.01    0.99 
   1 -12  -3   19.42    0.83 
  -1  12  -3   22.78    1.30 
  -2  12   3   18.18    1.10 
   2  12  -3   16.59    1.06 
   2 -12  -3   17.41    0.83 
  -2  12  -3   17.77    1.21 
  -2  12  -3   15.97    0.82 
   3  12  -3   10.51    0.96 
  -3 -12  -3    9.37    1.56 
  -3  12   3   10.53    0.90 
  -3  12  -3   11.82    1.12 
   3  12   3    9.94    1.01 
   3 -12  -3   10.10    0.75 
   4  12   3    1.89    0.53 
  -4  12  -3    0.07    0.61 
   4 -12  -3    1.05    0.41 
   5  12  -3    3.69    0.63 
   5 -12  -3    4.38    0.57 
  -5  12  -3    5.97    0.87 
   5  12   3    3.27    0.65 
  -6 -12  -3    0.36    0.65 
   6  12  -3    0.75    0.56 
  -6  12   3    0.37    0.70 
   6  12   3   -0.70    0.54 
  -7 -12  -3   16.12    1.38 
   7  12  -3   16.13    1.42 
  -7  12   3   13.09    1.57 
  -7  12  -3   15.12    1.73 
   7 -12  -3   15.40    1.23 
   7  12   3   15.50    1.50 
   8  12  -3    2.94    0.74 
  -8  12   3    3.38    1.01 
  -8 -12  -3    3.90    1.15 
   8 -12  -3    4.70    0.99 
  -8  12  -3    4.98    1.02 
   8  12   3    3.95    0.84 
   0  13  -3    0.03    0.38 
   0  13   3   -0.28    0.34 
   0  13  -3   -0.69    0.45 
  -1  13   3    2.22    0.63 
  -1  13   3    2.58    0.48 
   1  13  -3    3.57    0.91 
   1  13  -3    4.17    0.72 
   1 -13  -3    4.26    0.45 
  -1  13  -3    3.98    0.67 
   1  13   3    3.08    0.55 
   1  13   3    3.12    0.88 
   2  13  -3    4.37    0.78 
  -2  13   3    5.71    0.86 
  -2  13   3    5.12    0.96 
   2 -13  -3    6.58    0.57 
   2  13   3    6.63    0.88 
  -2  13  -3    4.41    0.62 
  -2  13  -3    4.89    0.91 
   2  13   3    5.93    0.94 
   3  13  -3    9.18    0.97 
  -3  13   3    8.46    1.25 
  -3  13   3    8.02    1.08 
  -3  13  -3   11.94    1.21 
   3 -13  -3    8.92    0.77 
  -4  13   3    1.59    1.00 
  -4 -13  -3    4.08    0.85 
   4  13  -3    2.34    0.54 
   4  13   3    2.27    0.58 
  -4  13  -3    1.55    0.71 
   4 -13  -3    2.17    0.45 
  -5 -13  -3    0.05    0.69 
  -5  13   3    0.48    0.72 
   5 -13  -3   -0.10    0.40 
  -5  13  -3    0.53    0.72 
   5  13   3    0.16    0.52 
  -6 -13  -3    2.65    1.28 
   6  13  -3    0.74    0.55 
  -6  13   3    0.82    0.79 
  -6  13  -3   -0.40    0.76 
   6 -13  -3    0.06    0.53 
   6  13   3   -0.28    0.60 
  -7  13   3    0.42    0.88 
   7  13  -3    0.07    0.60 
  -7 -13  -3    1.80    0.91 
  -7  13  -3   -0.11    0.93 
   7  13   3   -0.18    0.68 
   8  13  -3    0.71    0.76 
  -8  13   3    0.17    0.92 
  -8 -13  -3    1.11    0.95 
   8 -13  -3    0.43    0.61 
   8  13   3   -0.57    0.74 
   0  14   3   -0.53    0.65 
   0  14   3    0.42    0.42 
   0  14  -3    0.11    0.59 
   1  14  -3   -0.44    0.64 
   1  14  -3    0.14    0.36 
  -1  14   3    0.34    0.38 
   1  14   3    0.00    0.98 
  -1  14  -3   -0.07    0.34 
   1  14   3    0.35    0.43 
  -1  14  -3   -0.92    0.54 
  -2  14   3    1.33    0.77 
  -2  14   3    0.98    0.42 
   2  14  -3    0.99    0.42 
  -2  14  -3    0.77    0.34 
   2  14   3    0.22    0.49 
   2 -14  -3    1.55    0.37 
  -3  14   3    3.56    0.57 
   3  14  -3    4.05    0.62 
  -3  14   3    3.14    0.82 
   3 -14  -3    3.56    0.57 
  -3  14  -3    3.98    0.96 
   4  14  -3    4.24    0.67 
  -4  14   3    2.87    0.89 
  -4  14  -3    3.25    0.90 
   4  14   3    4.73    0.86 
   4 -14  -3    3.85    0.51 
  -5  14   3    0.07    0.82 
  -5 -14  -3    0.99    1.44 
   5  14  -3    0.81    0.58 
   5 -14  -3    0.32    0.45 
  -5  14  -3   -0.82    0.77 
   5  14   3    0.80    0.59 
  -6 -14  -3    3.68    1.03 
  -6  14   3    2.79    1.01 
  -6  14  -3    3.14    1.05 
   6  14   3    2.95    0.76 
   6 -14  -3    3.17    0.58 
  -7 -14  -3    2.31    1.08 
  -7  14   3    1.02    1.04 
   7  14  -3   -0.29    1.32 
  -7  14  -3   -0.60    1.93 
   7  14   3    0.87    0.88 
   7 -14  -3    0.81    0.63 
   0  15   3    3.37    0.83 
   0  15  -3    4.71    0.88 
   0  15   3    3.16    0.55 
  -1  15   3    4.36    0.91 
   1  15  -3    8.19    1.30 
  -1  15   3    4.98    0.72 
   1  15  -3    6.39    0.88 
  -1  15  -3    4.76    0.70 
   1  15   3    4.30    0.69 
   1  15   3    8.35    1.39 
  -2  15   3    2.38    0.53 
   2  15  -3    1.96    0.50 
   2  15  -3    2.67    0.79 
  -2  15   3    2.30    0.83 
   2  15   3    2.11    0.61 
   2  15   3    2.56    0.78 
  -2  15  -3    1.63    0.73 
  -3  15   3    1.37    0.48 
  -3  15   3    1.32    0.84 
   3  15  -3    0.65    0.49 
   3  15   3    1.16    0.73 
   3  15   3    0.66    0.57 
  -3  15  -3    1.43    0.80 
   4  15  -3    1.45    0.66 
  -4  15   3    1.59    0.92 
  -4  15  -3    1.77    0.88 
   4 -15  -3    2.06    0.49 
   5  15  -3    1.17    0.63 
  -5  15   3    0.00    1.07 
  -5  15  -3    0.12    0.93 
   5  15   3    0.38    0.72 
  -6  15   3    0.61    1.00 
   6  15  -3    0.49    0.67 
   6 -15  -3    0.98    0.61 
   0  16   3    8.21    1.19 
   0  16  -3    5.62    0.67 
   0  16  -3    9.04    1.24 
   1  16  -3    0.58    0.75 
  -1  16   3    0.99    0.58 
  -1  16   3    0.41    0.81 
   1  16  -3    0.08    0.48 
  -1  16  -3   -0.57    0.76 
   1  16   3    0.40    0.55 
   1  16   3    0.96    0.86 
   2  16  -3    0.67    0.79 
  -2  16   3    0.02    0.85 
   2  16  -3    0.09    0.53 
  -2  16   3    0.37    0.51 
   2  16   3    1.03    0.85 
  -2  16  -3   -0.91    0.75 
   2  16   3   -0.25    0.57 
  -3  16   3    2.80    1.15 
   3  16  -3    3.08    0.72 
   3  16   3    4.83    1.12 
  -3  16  -3    3.99    0.98 
   3  16   3    3.47    0.75 
   4  16  -3   -0.25    0.61 
  -4  16   3   -0.91    1.10 
  -4  16  -3   -2.32    1.77 
   4  16   3    0.59    0.67 
   0  17   3    0.02    0.62 
   0  17  -3   -2.19    1.84 
   0  17   3   -0.41    1.24 
  -1  17   3    1.78    1.14 
  -1  17   3    1.07    0.65 
   1  17  -3    0.22    1.21 
   1  17   3    0.59    0.63 
  -1  17  -3   -0.91    1.81 
   1  17   3   -0.59    1.19 
   2  17  -3    0.61    0.97 
  -2  17   3   -0.81    0.95 
   2  17   3    0.23    0.67 
   2  17   3    0.89    1.04 
  -2  17  -3   -0.70    1.09 
   0   0   4    2.52    0.31 
   0   0  -4    2.99    0.30 
   0   0  -4    2.27    0.31 
   1   0   4   12.17    0.57 
   1   0  -4   13.05    0.54 
   1   0   4   12.17    0.54 
   1   0  -4   11.57    0.47 
  -1   0  -4   12.44    0.54 
  -1   0   4   11.75    0.51 
  -1   0   4   12.47    0.48 
  -2   0   4  379.06   10.64 
  -2   0  -4  346.27   10.58 
   2   0   4  361.49   10.59 
   2   0  -4  369.22   10.64 
  -2   0  -4  370.98   10.65 
   2   0  -4  374.85   10.67 
   2   0  -4  350.08   10.55 
  -2   0   4  344.61   10.65 
   2   0   4  352.11   10.65 
  -2   0  -4  353.19   10.70 
   2   0   4  362.65   10.70 
  -2   0   4  361.20   10.55 
  -3   0   4  130.13    3.74 
  -3   0   4  125.94    3.92 
  -3   0  -4  123.54    3.84 
   3   0  -4  121.46    3.86 
  -3   0  -4  127.78    3.90 
   3   0   4  133.56    3.86 
  -3   0  -4  122.03    3.94 
   4   0   4   84.96    2.57 
   4   0  -4   72.65    2.38 
  -4   0  -4   68.79    2.37 
  -4   0  -4   73.26    2.40 
  -4   0   4   73.01    2.48 
  -4   0  -4   73.16    2.48 
   4   0   4   74.12    2.39 
   5   0  -4   64.49    2.15 
   5   0   4   63.71    2.15 
  -5   0   4   63.56    2.26 
  -5   0  -4   64.77    2.25 
  -5   0  -4   63.13    2.18 
  -5   0   4   64.46    2.00 
  -6   0  -4    2.92    0.48 
   6   0  -4    2.72    0.40 
  -6   0  -4    3.75    0.68 
   6   0   4    3.81    0.54 
  -6   0   4    3.72    0.40 
   7   0  -4   33.15    1.37 
  -7   0   4   34.44    1.24 
  -7   0  -4   32.98    1.53 
   7   0   4   34.50    1.41 
  -7   0   4   32.74    1.57 
  -8   0  -4    9.54    1.03 
   8   0   4   10.54    0.94 
   8   0  -4   12.77    0.78 
   8   0  -4   10.55    0.77 
  -8   0   4   10.71    0.71 
  -8   0  -4   10.34    0.95 
  -9   0   4   16.47    0.94 
   9   0   4   17.60    1.12 
  -9   0  -4   18.06    1.17 
   9   0  -4   16.81    1.00 
  -9   0  -4   18.45    1.53 
 -10   0   4    3.51    0.82 
 -10   0   4    4.57    0.87 
  10   0   4    2.77    0.57 
  10   0  -4    3.40    0.59 
 -11   0   4   15.22    1.45 
  11   0  -4    9.77    1.04 
 -11   0  -4   11.72    1.52 
  12   0  -4    0.31    0.59 
 -12   0   4    3.49    0.95 
  12   0   4    1.28    0.66 
 -12   0  -4    1.40    0.95 
  12   0  -4    2.53    0.83 
   0  -1   4  261.55    7.70 
   0   1   4  255.38    7.64 
   0  -1  -4  260.94    7.64 
   0  -1  -4  258.56    7.73 
   0   1   4  247.20    7.74 
   0  -1  -4  273.21    7.75 
   0   1  -4  252.39    7.70 
   0   1   4  274.64    7.73 
  -1   1   4  768.06   21.73 
  -1  -1  -4  759.85   21.77 
   1  -1   4  744.34   21.76 
   1   1  -4  712.91   21.71 
   1  -1   4  716.65   21.72 
   1   1   4  792.44   21.78 
   1   1   4  715.87   21.76 
  -1   1  -4  750.16   21.72 
   1  -1  -4  705.53   21.72 
   1  -1  -4  756.59   21.78 
   2   1  -4   74.36    2.36 
  -2   1   4   72.50    2.36 
   2  -1   4   76.77    2.28 
   2  -1   4   74.75    2.31 
  -2  -1  -4   73.85    2.36 
  -2  -1  -4   71.78    2.39 
   2   1  -4   71.02    2.31 
  -2   1   4   76.52    2.28 
  -2   1   4   71.64    2.32 
   2   1   4   73.80    2.36 
  -2   1  -4   77.59    2.31 
   2  -1  -4   73.47    2.33 
   2  -1  -4   75.69    2.36 
   2   1   4   74.45    2.40 
  -2  -1   4   78.90    2.32 
   2   1   4   78.56    2.29 
   2  -1  -4   73.20    2.28 
  -2   1  -4   73.09    2.39 
  -2   1  -4   74.39    2.28 
  -2  -1   4   73.33    2.35 
   3  -1   4  249.39    7.18 
   3  -1   4  231.03    7.15 
  -3   1   4  235.13    7.25 
  -3  -1  -4  235.44    7.21 
  -3  -1  -4  231.06    7.26 
   3   1  -4  242.53    7.18 
  -3   1   4  242.75    7.11 
  -3  -1   4  236.41    7.24 
  -3   1  -4  243.06    7.27 
  -3   1  -4  242.06    7.15 
   3  -1  -4  246.87    7.20 
   3   1   4  241.39    7.22 
   3   1   4  254.37    7.19 
  -3   1  -4  237.14    7.17 
  -4   1   4   48.25    1.78 
   4   1  -4   47.01    1.65 
  -4  -1  -4   49.59    1.69 
   4  -1   4   48.83    1.64 
  -4  -1  -4   49.54    1.77 
  -4   1  -4   49.04    1.76 
   4   1   4   49.10    1.71 
  -4   1  -4   50.12    1.62 
   4  -1  -4   49.47    1.68 
  -4   1  -4   51.37    1.71 
  -4  -1   4   50.44    1.77 
   5   1  -4   25.40    1.04 
  -5  -1  -4   26.95    1.11 
  -5  -1  -4   25.82    1.16 
  -5   1   4   26.77    1.22 
  -5  -1   4   24.65    1.17 
  -5   1  -4   25.65    1.13 
   5  -1  -4   26.31    1.06 
   5   1   4   26.54    1.17 
  -5   1  -4   25.22    1.15 
  -5   1  -4   27.77    1.08 
  -6  -1  -4   36.16    1.54 
  -6   1   4   37.54    1.30 
   6   1  -4   36.48    1.40 
  -6  -1  -4   35.86    1.48 
   6  -1   4   35.94    1.38 
  -6   1  -4   35.36    1.53 
   6   1   4   37.18    1.48 
  -6   1  -4   35.87    1.50 
  -6  -1   4   37.55    1.23 
  -7   1   4    7.26    0.58 
  -7   1   4    6.27    0.86 
   7   1  -4    6.69    0.63 
   7  -1   4    8.44    0.68 
  -7  -1  -4    6.56    0.83 
  -7  -1   4    5.65    0.79 
   7  -1  -4    6.66    0.64 
  -7   1  -4    6.67    0.82 
   7   1   4    8.09    0.77 
  -7  -1   4    7.33    0.52 
   8  -1   4   10.16    0.84 
   8   1  -4   10.44    0.75 
  -8  -1  -4   10.01    0.97 
  -8  -1  -4   11.18    0.94 
  -8   1   4    9.62    0.71 
   8   1  -4   10.41    0.75 
  -8  -1   4   10.45    0.65 
   8   1   4   10.98    0.90 
  -8   1  -4    9.55    1.15 
  -8   1  -4    9.37    0.92 
   8  -1  -4    9.77    0.79 
  -9  -1  -4    5.49    0.82 
  -9   1   4    4.59    0.70 
   9  -1   4    4.19    0.65 
  -9  -1  -4    6.21    1.23 
   9   1  -4    4.75    0.70 
   9   1  -4    4.83    0.67 
  -9   1  -4    3.99    0.73 
  -9  -1   4    4.27    0.62 
  -9   1  -4    5.16    0.83 
   9   1   4    5.62    0.79 
   9  -1  -4    4.27    0.68 
   9  -1  -4    5.34    0.64 
 -10   1   4    4.28    0.87 
  10   1  -4    5.20    0.92 
  10   1  -4    4.00    0.60 
 -10   1   4    4.21    0.79 
  10  -1   4    2.97    0.56 
 -10  -1   4    4.52    0.85 
 -10  -1   4    3.84    0.67 
  10  -1  -4    5.16    1.03 
  10   1   4    3.36    0.61 
 -10   1  -4    4.42    0.72 
 -11  -1  -4    9.36    1.24 
 -11   1   4   12.60    1.40 
  11  -1   4    9.73    1.06 
  11   1  -4   10.93    1.33 
  11   1  -4    7.63    1.02 
 -11   1  -4   14.10    1.77 
  11   1   4    9.59    1.54 
  11  -1  -4   11.51    1.09 
 -11  -1   4   13.74    1.46 
 -12  -1  -4    1.43    0.91 
 -12   1   4    4.00    0.92 
  12   1  -4    3.21    0.68 
  12   1  -4    2.23    0.64 
  12  -1  -4    1.72    0.61 
  12   1   4    3.27    1.23 
 -12   1  -4    2.36    1.01 
   0   2   4   93.29    2.78 
   0   2   4   87.64    2.70 
   0  -2  -4   91.98    2.81 
   0  -2  -4   87.32    2.77 
   0   2   4   86.10    2.79 
  -1  -2  -4  301.87    9.37 
  -1   2   4  331.48    9.31 
   1   2  -4  314.71    9.29 
  -1   2   4  314.57    9.37 
  -1   2   4  329.33    9.33 
  -1   2   4  311.40    9.31 
  -1   2  -4  302.16    9.26 
  -1   2  -4  316.72    9.28 
   1   2   4  331.08    9.38 
  -1   2  -4  309.53    9.35 
   1  -2  -4  321.33    9.35 
   1  -2  -4  327.61    9.37 
   1  -2  -4  314.67    9.31 
   1   2   4  294.40    9.36 
   1  -2  -4  306.19    9.33 
  -2   2   4  140.96    4.21 
   2  -2   4  141.04    4.19 
   2   2  -4  140.22    4.24 
  -2   2   4  150.58    4.29 
  -2   2   4  135.24    4.26 
   2   2  -4  139.38    4.19 
  -2  -2  -4  140.53    4.28 
  -2  -2  -4  135.57    4.29 
   2  -2   4  138.77    4.16 
  -2  -2   4  144.62    4.20 
  -2   2  -4  135.40    4.19 
  -2   2  -4  139.38    4.17 
   2  -2  -4  136.28    4.21 
  -2   2  -4  133.82    4.28 
   2  -2  -4  139.30    4.25 
   2   2   4  135.32    4.27 
   2  -2  -4  141.45    4.27 
   2  -2  -4  140.91    4.23 
   3  -2   4   21.65    0.84 
  -3   2   4   20.27    0.92 
  -3   2   4   22.47    0.80 
   3  -2   4   22.02    0.75 
   3   2  -4   20.82    0.79 
  -3  -2  -4   20.47    0.91 
   3   2   4   20.38    0.88 
   3   2   4   20.83    0.88 
  -3  -2   4   22.23    0.88 
  -3   2  -4   20.61    0.85 
   3  -2  -4   19.80    0.86 
  -3   2  -4   19.73    0.73 
  -4   2   4   55.63    2.01 
   4   2  -4   57.14    1.86 
  -4  -2  -4   56.93    1.99 
  -4   2   4   58.71    1.85 
  -4   2  -4   56.05    1.79 
  -4   2  -4   54.88    1.98 
  -4  -2   4   55.97    1.98 
   4   2   4   57.25    1.96 
  -4   2  -4   57.07    1.93 
  -5  -2  -4   28.46    1.25 
   5   2  -4   29.14    1.12 
  -5   2   4   29.34    1.31 
   5  -2   4   28.94    1.08 
  -5   2  -4   29.83    1.27 
   5   2   4   29.52    1.24 
  -5  -2   4   28.55    1.27 
  -5   2  -4   29.89    1.24 
   5  -2  -4   30.41    1.17 
  -5   2  -4   31.04    1.04 
  -6  -2  -4   79.72    2.71 
  -6   2   4   72.41    2.89 
   6  -2   4   79.96    2.53 
   6   2  -4   75.28    2.53 
   6  -2   4   77.93    2.59 
  -6   2  -4   77.39    2.68 
  -6   2  -4   71.42    2.84 
   6  -2  -4   77.54    2.59 
   6   2   4   79.16    2.67 
  -6  -2   4   77.42    2.36 
  -6  -2   4   75.19    2.90 
  -7  -2  -4    6.64    0.82 
   7   2  -4    6.12    0.65 
  -7   2   4    6.59    0.94 
   7  -2   4    6.85    0.64 
   7   2  -4    6.53    0.59 
   7  -2   4    5.86    0.62 
   7  -2  -4    5.48    0.62 
  -7   2  -4    6.29    0.80 
  -7  -2   4    6.39    0.46 
  -7   2  -4    6.12    0.80 
  -7  -2   4    5.30    0.81 
  -8   2   4    7.45    0.67 
  -8  -2  -4    6.75    0.83 
   8   2  -4    8.84    0.70 
   8  -2   4    6.58    0.72 
   8  -2   4    6.07    0.65 
   8   2  -4    7.93    0.67 
  -8   2  -4    7.25    1.18 
  -8  -2   4    7.46    0.55 
  -8   2  -4    6.17    0.83 
   8  -2  -4    6.64    0.67 
   8   2   4    7.75    0.81 
   9  -2   4   20.49    1.16 
  -9  -2  -4   19.34    1.23 
  -9   2   4   19.56    1.05 
   9  -2   4   18.62    1.17 
   9   2   4   18.73    1.17 
  -9   2  -4   20.85    1.43 
  -9  -2   4   18.97    1.11 
  -9   2  -4   20.27    1.26 
   9  -2  -4   18.56    1.14 
  10   2  -4    1.65    0.44 
  10  -2   4    1.90    0.51 
 -10   2   4    1.89    0.64 
  10   2  -4    2.07    0.49 
 -10   2  -4    1.81    0.62 
  10  -2  -4    1.50    0.61 
  10  -2  -4    1.07    0.39 
 -10   2  -4    0.72    0.89 
 -11   2   4    1.23    0.72 
  11  -2   4    0.74    0.48 
 -11  -2  -4    1.68    0.81 
 -11   2   4    2.80    0.76 
  11   2  -4    1.34    0.57 
  11   2   4    1.12    0.61 
  11  -2  -4    1.25    0.45 
  11  -2  -4    1.64    0.58 
 -11   2  -4   -0.27    1.15 
 -11   2  -4    2.20    0.93 
  12   2  -4    6.34    0.99 
 -12  -2  -4    3.87    1.02 
  12   2  -4    3.81    0.76 
 -12   2   4    3.98    0.93 
 -12   2  -4    3.76    1.28 
  12   2   4    2.94    0.78 
  12  -2  -4    2.73    0.93 
  12  -2  -4    2.79    0.64 
   0   3   4   13.85    0.64 
   0   3   4   12.47    0.54 
   0  -3  -4   12.29    0.51 
   0   3   4   12.98    0.62 
   0  -3  -4   12.98    0.63 
  -1   3   4  210.00    6.17 
  -1   3   4  213.67    6.12 
   1   3  -4  203.70    6.08 
  -1   3   4  200.42    6.15 
  -1   3   4  202.08    6.18 
  -1  -3  -4  211.69    6.21 
  -1  -3  -4  196.86    6.19 
   1  -3  -4  207.19    6.12 
   1  -3  -4  213.69    6.19 
  -1   3  -4  195.73    6.10 
   1   3   4  202.74    6.20 
   1   3   4  211.49    6.24 
   1  -3  -4  198.36    6.16 
   1  -3  -4  203.17    6.14 
   2  -3   4   79.37    2.43 
  -2   3   4   77.79    2.50 
   2   3  -4   75.76    2.47 
  -2  -3  -4   75.46    2.52 
   2   3  -4   79.16    2.34 
  -2   3   4   76.87    2.46 
   2   3  -4   77.38    2.39 
   2  -3  -4   77.29    2.44 
  -2   3  -4   76.30    2.43 
  -2   3  -4   80.98    2.34 
   2  -3  -4   77.14    2.48 
   2  -3  -4   76.53    2.48 
   3  -3   4  161.56    4.73 
  -3   3   4  154.59    4.81 
  -3   3   4  158.53    4.73 
  -3  -3  -4  149.48    4.80 
   3  -3   4  155.74    4.59 
   3   3  -4  150.54    4.66 
   3   3   4  158.22    4.74 
  -3  -3   4  159.30    4.67 
  -3   3  -4  149.33    4.59 
  -3   3  -4  150.62    4.73 
   3   3   4  155.41    4.81 
   3  -3  -4  156.47    4.73 
   4  -3   4   66.72    1.97 
  -4  -3  -4   63.11    2.19 
  -4   3   4   65.57    2.25 
   4   3  -4   63.65    2.04 
  -4   3  -4   62.82    1.94 
  -4   3  -4   63.36    2.22 
   4   3   4   62.54    2.19 
   4  -3  -4   61.41    2.10 
  -4   3  -4   62.13    2.15 
  -5   3   4   14.45    0.97 
   5   3  -4   13.08    0.78 
  -5  -3  -4   14.83    0.85 
   5  -3  -4   13.36    0.74 
  -5   3  -4   12.18    0.83 
  -5   3  -4   13.38    0.93 
   5   3   4   13.19    0.82 
   6   3  -4   13.33    0.74 
   6  -3   4   14.46    0.80 
  -6  -3  -4   14.83    0.98 
  -6   3   4   14.86    1.07 
   6  -3   4   14.60    0.69 
   6   3  -4   15.13    0.82 
   6   3   4   14.71    0.99 
  -6   3  -4   13.32    0.97 
   6  -3  -4   13.83    0.80 
  -6   3  -4   14.18    0.98 
   7  -3   4    7.01    0.62 
   7  -3   4    6.35    0.59 
   7   3  -4    7.88    0.68 
  -7  -3  -4    7.02    0.84 
  -7   3   4    7.04    1.00 
  -7   3  -4    7.93    0.95 
  -7   3  -4    7.24    0.84 
   7  -3  -4    5.19    0.67 
  -7  -3   4    7.65    0.48 
   7   3   4    8.25    0.84 
  -8   3   4    5.34    0.66 
  -8  -3  -4    5.82    0.79 
   8   3  -4    4.77    0.59 
   8   3  -4    4.90    0.61 
   8  -3   4    4.45    0.63 
  -8  -3   4    5.58    0.49 
  -8   3  -4    4.93    0.81 
   8   3   4    5.17    0.77 
   9  -3   4    7.03    0.81 
  -9  -3  -4    8.24    1.32 
   9   3  -4    7.37    0.73 
  -9   3   4    7.60    0.89 
  -9   3  -4    7.86    1.04 
   9  -3  -4    8.25    0.71 
   9   3   4    8.32    0.94 
  -9  -3   4    8.77    0.63 
 -10   3   4    0.75    0.59 
  10   3  -4    0.65    0.45 
  10   3  -4    1.24    0.48 
 -10   3   4    1.07    0.63 
  10  -3   4    0.92    0.50 
  10   3   4    0.19    0.57 
  10  -3  -4    0.77    0.37 
  10  -3  -4    0.79    0.53 
 -10   3  -4    0.12    0.70 
 -10   3  -4    0.86    0.59 
  11   3  -4    2.76    0.89 
  11   3  -4    3.28    0.63 
 -11  -3  -4    3.37    0.87 
 -11   3   4    4.39    0.78 
 -11   3  -4    3.42    0.99 
  11  -3  -4    2.94    0.70 
  11  -3  -4    3.38    0.80 
 -12  -3  -4    3.56    0.99 
  12   3  -4    3.05    0.67 
  12   3  -4    3.56    0.71 
  12   3   4    2.08    0.76 
  12  -3  -4    3.34    0.77 
 -12   3  -4    2.97    1.13 
   0  -4  -4   57.66    1.78 
   0   4   4   56.42    1.90 
   0  -4  -4   54.99    1.90 
   0   4   4   56.94    1.85 
  -1   4   4   43.42    1.50 
  -1  -4  -4   44.01    1.55 
  -1   4   4   44.04    1.52 
  -1   4   4   45.29    1.44 
   1   4   4   43.83    1.55 
   1  -4  -4   43.47    1.53 
  -1   4  -4   43.09    1.46 
   1  -4  -4   43.27    1.50 
   1  -4  -4   42.93    1.43 
  -2  -4  -4  418.58   12.97 
  -2   4   4  420.92   12.94 
   2  -4   4  459.70   12.96 
   2   4  -4  442.15   12.81 
   2   4  -4  449.54   12.81 
  -2   4  -4  426.36   12.89 
   2  -4  -4  434.59   12.87 
   3   4  -4   77.68    2.41 
   3   4  -4   81.21    2.37 
  -3  -4  -4   76.25    2.58 
  -3   4   4   77.19    2.59 
  -3  -4   4   80.68    2.42 
  -3   4  -4   76.41    2.51 
   3   4   4   75.95    2.59 
   3  -4  -4   74.19    2.48 
  -4  -4  -4   46.85    1.75 
   4   4  -4   44.22    1.67 
  -4   4   4   47.11    1.79 
   4   4  -4   49.31    1.51 
   4   4  -4   47.31    1.57 
  -4   4  -4   48.44    1.72 
   4   4   4   48.82    1.78 
   4  -4  -4   47.75    1.66 
   5   4  -4   28.32    1.21 
  -5  -4  -4   29.04    1.28 
  -5   4   4   28.36    1.40 
   5   4  -4   28.02    1.07 
  -5   4  -4   29.05    1.30 
   5  -4  -4   28.70    1.18 
   5   4   4   29.33    1.33 
  -5   4  -4   27.97    1.30 
   6   4  -4   13.31    0.78 
  -6  -4  -4   10.76    1.00 
  -6   4   4   12.21    1.08 
   6  -4   4   11.97    0.75 
   6   4  -4   12.31    0.68 
  -6   4  -4   11.12    0.91 
  -6  -4   4   12.49    0.55 
   6  -4  -4   12.51    0.77 
  -6   4  -4   12.81    1.04 
   6   4   4   12.92    0.95 
   7  -4   4   35.70    1.28 
   7  -4   4   35.08    1.47 
  -7   4   4   36.25    1.72 
   7   4  -4   34.99    1.52 
  -7  -4  -4   34.86    1.58 
  -7  -4   4   36.73    1.23 
  -7   4  -4   36.55    1.67 
   7   4   4   35.94    1.62 
  -7   4  -4   33.50    1.58 
   7  -4  -4   34.73    1.48 
   8  -4   4    9.93    0.72 
   8   4  -4   12.71    0.87 
   8   4  -4   10.50    0.76 
  -8  -4  -4   12.55    0.94 
  -8   4  -4    9.52    0.95 
  -8  -4   4   12.18    0.64 
   8   4   4   10.15    1.11 
  -9   4   4   19.27    1.16 
   9   4  -4   19.84    1.06 
  -9  -4  -4   19.26    1.23 
   9  -4   4   19.67    1.03 
   9   4  -4   21.11    1.21 
  -9   4  -4   19.66    1.32 
  10  -4   4    4.04    0.61 
 -10   4   4    5.17    0.93 
  10   4  -4    4.30    0.59 
 -10   4   4    4.43    0.84 
  10   4  -4    5.23    0.94 
  10   4   4    4.04    0.74 
  10  -4  -4    4.50    0.73 
 -10   4  -4    4.88    0.80 
 -10   4  -4    5.47    1.01 
  10  -4  -4    5.50    0.87 
 -11   4   4    2.57    0.82 
 -11   4   4    2.00    0.74 
 -11  -4  -4    1.70    0.80 
  11   4  -4    2.19    0.55 
  11   4  -4    1.45    0.56 
  11   4   4    0.89    0.68 
 -11   4  -4    1.84    0.94 
 -11   4  -4    1.50    0.72 
  11  -4  -4    1.26    0.63 
   0  -5  -4    0.04    0.27 
   0  -5  -4    0.09    0.15 
   0   5   4    0.32    0.20 
   0   5   4    0.31    0.21 
  -1  -5  -4  202.74    6.14 
  -1   5   4  197.39    6.09 
  -1  -5  -4  198.68    5.95 
  -1   5   4  201.02    6.09 
  -1   5   4  205.41    5.99 
   1   5   4  202.72    6.13 
  -1   5  -4  184.45    5.92 
   1  -5  -4  201.40    5.99 
   1  -5  -4  207.11    6.14 
  -1   5  -4  204.55    5.97 
  -1   5  -4  196.56    6.06 
  -2   5   4    6.55    0.50 
   2   5  -4    6.78    0.43 
  -2   5   4    6.60    0.56 
  -2  -5  -4    6.13    0.55 
   2   5  -4    6.35    0.43 
   2   5  -4    6.39    0.35 
   2  -5  -4    6.05    0.42 
  -2   5  -4    6.52    0.50 
   2   5   4    6.25    0.56 
   3   5  -4    8.64    0.43 
  -3  -5  -4    8.22    0.65 
  -3   5   4    8.91    0.70 
   3   5  -4    9.34    0.55 
   3   5  -4    9.39    0.48 
  -3   5  -4    9.00    0.69 
   3  -5  -4    8.41    0.52 
   3   5   4    9.50    0.70 
   4   5  -4   32.92    1.16 
   4   5  -4   30.72    1.29 
  -4   5   4   33.76    1.45 
  -4  -5  -4   34.42    1.39 
   4   5  -4   33.72    1.14 
  -4   5  -4   34.46    1.37 
   4  -5  -4   32.87    1.26 
   4   5   4   34.54    1.42 
  -5   5   4    5.50    1.00 
   5   5  -4    4.37    0.51 
   5   5  -4    3.81    0.38 
   5   5  -4    3.58    0.40 
  -5  -5  -4    4.08    0.68 
  -5   5  -4    5.87    0.77 
   5   5   4    3.89    0.79 
   6   5  -4   40.19    1.34 
  -6  -5  -4   39.98    1.70 
   6  -5   4   38.02    1.53 
  -6   5   4   39.50    1.83 
   6   5  -4   38.98    1.43 
   6   5  -4   39.89    1.59 
   6   5   4   40.68    1.71 
  -6  -5   4   40.29    1.34 
   6  -5  -4   38.08    1.53 
  -7   5   4    2.22    0.64 
   7   5  -4    2.83    0.44 
   7  -5   4    2.27    0.42 
   7   5  -4    1.65    0.36 
  -7  -5  -4    2.34    0.61 
   7   5   4    2.35    0.50 
  -7   5  -4    2.27    0.59 
  -7  -5   4    2.86    0.44 
   7  -5  -4    2.44    0.45 
  -7   5  -4    2.15    0.63 
   8   5  -4    3.55    0.48 
  -8  -5  -4    4.03    0.69 
  -8  -5   4    4.02    0.52 
   8   5   4    2.30    0.57 
  -8   5  -4    3.05    0.73 
   9   5  -4    6.92    0.71 
  -9  -5  -4    9.05    0.96 
   9  -5   4    5.75    0.80 
   9   5  -4    8.22    0.91 
  -9   5  -4    9.49    1.09 
  -9   5  -4    8.20    1.11 
   9   5   4    7.19    1.07 
 -10   5   4    1.73    0.68 
  10   5  -4    0.36    0.45 
  10   5  -4    1.62    0.45 
 -10   5   4    1.27    0.70 
  10  -5  -4    1.50    0.40 
  10  -5  -4    1.42    0.56 
 -11   5   4    4.24    0.94 
  11   5  -4    2.47    0.64 
  11   5   4    1.86    0.75 
 -11   5  -4    3.75    0.86 
  11  -5  -4    2.68    0.68 
 -11   5  -4    1.99    1.08 
   0   6  -4   19.31    0.80 
   0  -6  -4   22.79    0.80 
   0   6   4   22.36    0.96 
   0   6   4   22.02    0.96 
   1   6  -4   32.11    1.20 
  -1   6   4   33.17    1.28 
  -1  -6  -4   34.39    1.12 
  -1   6   4   34.02    1.32 
  -1  -6  -4   32.39    1.33 
   1   6   4   33.96    1.34 
  -1   6  -4   34.67    1.12 
   1  -6  -4   35.05    1.17 
   1  -6  -4   32.55    1.33 
  -1   6  -4   33.34    1.28 
  -1   6  -4   35.09    1.16 
  -2   6   4  146.02    4.52 
  -2  -6  -4  146.72    4.59 
   2   6  -4  131.74    4.46 
   2   6  -4  149.64    4.32 
   2   6  -4  145.07    4.43 
  -2   6   4  145.52    4.56 
   2  -6  -4  146.99    4.42 
   2   6   4  143.92    4.58 
  -2   6  -4  145.79    4.52 
   3   6  -4   19.42    0.91 
   3   6  -4   20.96    0.85 
  -3   6   4   20.59    1.04 
  -3  -6  -4   20.24    0.77 
  -3  -6  -4   19.20    1.00 
   3   6  -4   19.86    0.74 
   3  -6  -4   20.98    0.87 
  -3   6  -4   21.61    0.99 
   3   6   4   21.05    1.05 
   4   6  -4   37.68    1.28 
   4   6  -4   38.21    1.50 
  -4  -6  -4   37.99    1.56 
   4   6  -4   39.05    1.34 
  -4   6   4   38.65    1.66 
   4  -6  -4   36.81    1.42 
  -4   6  -4   39.46    1.56 
   4   6   4   37.01    1.98 
  -4  -6   4   38.55    1.31 
  -5   6   4   18.31    1.21 
   5   6  -4   17.63    0.77 
   5   6  -4   18.67    0.81 
   5   6  -4   18.27    0.96 
  -5   6  -4   19.44    1.16 
   5  -6  -4   18.69    0.92 
   5   6   4   19.80    1.11 
  -6  -6  -4    5.40    0.79 
  -6   6   4    6.72    0.97 
   6   6  -4    6.25    0.56 
   6   6  -4    7.84    0.67 
   6   6  -4    6.16    0.54 
   6  -6  -4    6.58    0.63 
  -6   6  -4    7.24    0.99 
   6   6   4    5.40    0.78 
  -7  -6  -4    1.22    0.56 
   7   6  -4    1.60    0.39 
   7  -6   4    0.75    0.39 
   7  -6  -4    1.12    0.40 
  -7   6  -4    1.47    0.54 
   7   6   4    1.00    0.47 
  -7   6  -4    0.68    0.56 
  -7  -6   4    1.74    0.38 
   8   6  -4    6.05    0.64 
  -8  -6  -4    6.15    0.88 
  -8  -6   4    6.28    0.58 
   9   6  -4    2.45    0.44 
  -9  -6  -4    3.94    0.83 
   9   6   4    2.50    0.65 
  -9   6  -4    2.95    0.71 
  -9   6  -4    4.51    0.86 
 -10   6   4    5.18    0.94 
 -10  -6  -4    6.61    1.21 
  10   6  -4    4.63    0.59 
  10   6  -4    3.90    0.66 
  10  -6  -4    3.70    0.70 
  10   6   4    3.90    0.80 
 -10   6  -4    4.13    0.84 
 -10   6  -4    6.37    1.17 
  11   6  -4    2.69    0.71 
  11   6  -4    2.55    0.72 
 -11   6   4    4.36    0.90 
  11   6   4    2.22    0.81 
  11  -6  -4    3.11    1.32 
  11  -6  -4    3.30    0.57 
 -11   6  -4    4.82    1.19 
   0  -7  -4   20.56    0.75 
   0  -7  -4   18.15    0.97 
   0   7   4   20.00    0.96 
   0   7  -4   20.17    0.80 
   0   7   4   19.44    0.94 
   0   7  -4   19.75    0.73 
  -1  -7  -4   21.04    1.01 
  -1   7   4   20.03    0.97 
  -1  -7  -4   21.22    0.74 
   1   7  -4   18.97    0.83 
  -1   7   4   19.90    0.93 
   1  -7  -4   19.25    0.98 
  -1   7  -4   20.00    0.94 
  -1   7  -4   19.89    0.79 
  -1   7  -4   21.35    0.77 
   1  -7  -4   19.70    0.89 
   1   7   4   19.44    0.99 
  -2  -7  -4    6.86    0.38 
  -2   7   4    7.47    0.58 
   2   7  -4    8.48    0.55 
  -2   7   4    7.57    0.66 
  -2  -7  -4    6.43    0.65 
   2   7  -4    7.24    0.35 
  -2   7  -4    6.42    0.62 
   2  -7  -4    7.63    0.47 
   3   7  -4   42.51    1.35 
  -3  -7  -4   43.79    1.39 
  -3  -7  -4   40.68    1.68 
  -3   7   4   42.70    1.72 
   3   7  -4   43.42    1.60 
  -3   7  -4   41.59    1.65 
   3   7   4   41.65    1.75 
   3  -7  -4   41.08    1.50 
  -4   7   4   64.76    2.46 
  -4  -7  -4   69.78    2.20 
   4   7  -4   63.55    2.07 
   4   7  -4   68.71    2.37 
   4  -7  -4   62.94    2.24 
  -4   7  -4   66.45    2.42 
   4   7   4   66.32    2.45 
   5   7  -4    4.77    0.58 
   5   7  -4    4.03    0.42 
  -5  -7  -4    4.08    0.72 
  -5   7   4    4.03    0.68 
  -5   7  -4    4.06    0.64 
   5   7   4    3.18    0.50 
   5  -7  -4    3.72    0.58 
  -6  -7  -4   33.47    1.54 
   6   7  -4   33.05    1.23 
  -6   7   4   32.99    1.64 
   6   7  -4   33.89    1.48 
   6  -7  -4   32.87    1.39 
   6   7   4   32.82    1.59 
  -6   7  -4   32.39    1.63 
   7   7  -4    5.89    0.56 
  -7  -7  -4    5.04    0.76 
  -7   7  -4    3.88    0.78 
   7  -7  -4    5.33    0.68 
  -8  -7  -4    0.83    0.56 
   8   7   4   -0.52    0.48 
  -8   7  -4   -0.13    0.93 
  -8   7  -4    0.25    0.60 
   8  -7  -4   -0.22    0.39 
   9   7  -4    7.94    0.74 
   9   7  -4   10.27    1.07 
  -9   7   4    9.06    1.30 
   9  -7  -4    8.00    0.96 
  -9   7  -4    9.11    1.22 
   9   7   4   10.68    1.44 
  10   7  -4    4.60    0.72 
 -10   7   4    3.89    0.92 
 -10  -7  -4    4.74    0.91 
  10   7  -4    3.59    0.68 
 -10   7  -4    4.32    1.12 
  10  -7  -4    5.12    0.71 
  10  -7  -4    4.79    0.76 
 -10   7  -4    2.87    0.83 
  10   7   4    3.53    0.81 
  11   7  -4    0.44    0.80 
  11   7  -4    1.92    0.59 
 -11  -7  -4    2.59    0.93 
 -11   7   4    2.54    0.95 
 -11   7  -4    1.12    1.12 
  11  -7  -4    2.16    0.77 
  11   7   4    0.46    0.77 
 -11   7  -4    1.12    0.83 
   0   8  -4   25.39    0.91 
   0  -8  -4   25.70    0.92 
   0   8  -4   26.42    1.02 
   0   8   4   25.78    1.20 
   0   8   4   25.19    1.16 
   0  -8  -4   25.55    1.24 
  -1  -8  -4    6.72    0.38 
  -1  -8  -4    6.54    0.69 
  -1   8   4    6.01    0.71 
   1   8  -4    6.42    0.51 
  -1   8   4    7.06    0.64 
   1   8  -4    6.75    0.41 
   1   8   4    6.63    0.70 
  -1   8  -4    7.26    0.65 
  -1   8  -4    6.97    0.47 
   1  -8  -4    6.61    0.44 
  -2  -8  -4   25.24    1.82 
   2   8  -4   28.53    0.93 
   2   8  -4   29.36    1.19 
  -2  -8  -4   29.10    0.96 
  -2   8   4   26.31    1.46 
  -2   8   4   29.58    1.21 
  -2   8  -4   29.14    0.97 
   2  -8  -4   28.31    1.08 
  -2   8  -4   28.41    1.28 
   3   8  -4   17.33    0.62 
  -3   8   4   17.55    1.10 
  -3  -8  -4   16.13    0.66 
  -3  -8  -4   16.54    1.03 
   3   8  -4   15.17    0.93 
   3   8   4   16.61    1.05 
  -3   8  -4   17.41    1.04 
   3  -8  -4   15.94    0.79 
   4   8  -4   22.31    0.81 
  -4  -8  -4   21.71    0.87 
  -4   8   4   23.53    1.29 
   4   8  -4   24.28    1.15 
  -4  -8  -4   21.67    1.20 
   4  -8  -4   21.18    1.03 
  -4   8  -4   22.69    1.25 
   4   8   4   20.41    1.24 
   5   8  -4   36.83    1.29 
  -5   8   4   38.39    1.83 
  -5  -8  -4   36.15    1.64 
   5   8  -4   36.54    1.60 
  -5   8  -4   37.97    1.76 
   5   8   4   38.72    1.82 
   5  -8  -4   39.16    1.51 
   6   8  -4   21.46    0.90 
   6   8  -4   22.98    1.21 
  -6  -8  -4   23.01    1.25 
  -6   8  -4   22.52    1.35 
   6  -8  -4   21.01    1.10 
   7   8  -4    3.86    0.55 
  -7  -8  -4    4.17    0.79 
  -7   8  -4    3.68    0.81 
  -8  -8  -4    5.83    1.11 
  -8   8  -4    3.66    0.98 
   8   8   4    4.63    0.77 
   8  -8  -4    5.25    0.74 
  -9   8   4    4.35    0.94 
  -9  -8  -4    6.43    1.06 
   9   8  -4    5.62    1.00 
   9   8  -4    7.29    0.76 
   9   8   4    3.82    0.76 
   9  -8  -4    5.44    0.76 
  -9   8  -4    5.61    1.07 
 -10  -8  -4    1.48    0.93 
 -10   8   4   -0.68    0.79 
  10   8  -4    1.01    0.61 
  10   8  -4    0.38    0.48 
 -10   8  -4    0.20    0.77 
  10   8   4   -0.61    0.64 
 -10   8  -4    1.53    0.98 
  10  -8  -4    0.66    0.65 
   0   9  -4   18.86    0.90 
   0   9   4   19.83    1.06 
   0  -9  -4   18.85    1.08 
   0   9  -4   19.51    0.74 
   0  -9  -4   19.19    0.75 
   0   9   4   20.00    1.26 
  -1   9   4   16.19    1.02 
  -1   9   4   16.15    0.92 
   1   9  -4   15.56    0.59 
  -1  -9  -4   16.27    1.04 
   1   9  -4   16.32    0.87 
   1   9  -4   16.57    0.61 
  -1  -9  -4   16.22    0.63 
   1   9   4   15.86    1.14 
   1   9   4   14.87    1.15 
   1  -9  -4   16.70    0.71 
  -1   9  -4   16.51    0.74 
  -2  -9  -4    0.90    0.19 
  -2  -9  -4    0.69    0.45 
  -2   9   4    0.29    0.42 
  -2   9   4    0.67    0.33 
   2   9  -4    1.14    0.34 
  -2   9  -4    1.19    0.47 
   2  -9  -4    0.75    0.27 
  -2   9  -4    1.06    0.20 
  -3  -9  -4    7.44    0.44 
  -3   9   4    8.61    0.92 
  -3  -9  -4    7.39    0.78 
  -3   9   4    7.81    0.70 
  -3  -9  -4    8.37    0.41 
   3   9  -4    8.77    0.71 
   3  -9  -4    7.89    0.65 
  -3   9  -4    7.40    0.84 
   3   9   4    7.63    0.84 
  -4  -9  -4   52.32    2.12 
   4   9  -4   55.04    2.08 
  -4  -9  -4   51.56    1.72 
  -4   9   4   53.85    2.22 
   4  -9  -4   53.22    2.09 
   4   9   4   52.93    2.18 
  -4   9  -4   56.70    2.18 
  -5   9   4    1.83    0.54 
  -5  -9  -4    2.00    0.57 
   5   9  -4    2.31    0.27 
   5   9  -4    1.96    0.39 
  -5   9  -4    2.01    0.55 
   5  -9  -4    2.17    0.41 
   6   9  -4   29.80    1.10 
   6   9  -4   29.39    1.47 
  -6  -9  -4   29.50    1.51 
   6  -9  -4   30.20    1.36 
  -6   9  -4   29.91    1.63 
   7   9  -4   -0.50    0.31 
   7   9  -4   -0.14    0.34 
  -7  -9  -4    1.19    0.58 
   8   9  -4    2.16    0.53 
   8   9  -4    4.25    0.67 
  -8   9   4    2.50    0.80 
   8   9   4    2.80    0.67 
  -8   9  -4    2.44    0.76 
   8  -9  -4    5.65    1.07 
   9   9  -4    3.09    0.52 
  -9   9   4    2.96    0.90 
   9   9  -4    2.24    0.62 
   9   9   4    3.04    0.77 
   9  -9  -4    4.86    0.74 
  -9   9  -4    4.09    1.11 
  -9   9  -4    2.87    0.84 
 -10  -9  -4    5.29    1.07 
  10  -9  -4    3.86    0.83 
 -10   9  -4    4.71    0.95 
 -10   9  -4    6.54    1.29 
  10   9   4    3.07    0.98 
   0  10  -4    5.88    0.43 
   0  10  -4    5.47    0.60 
   0  10  -4    4.38    0.72 
   0  10   4    5.81    0.78 
   0 -10  -4    5.34    0.41 
   1  10  -4   13.69    0.86 
  -1 -10  -4   13.21    0.56 
  -1  10   4   15.35    1.04 
  -1 -10  -4   14.24    1.00 
  -1  10   4   14.14    0.96 
   1 -10  -4   12.96    0.65 
  -1  10  -4   12.42    0.74 
  -1  10  -4   13.78    0.98 
   1  10   4   12.68    0.96 
   1  10   4   13.02    1.00 
  -2  10   4    3.85    0.61 
  -2  10   4    3.34    0.49 
  -2 -10  -4    4.25    0.71 
  -2  10  -4    4.23    0.74 
   2 -10  -4    3.27    0.47 
   2  10   4    4.50    0.74 
   3  10  -4    7.77    0.79 
  -3  10   4    9.61    0.76 
  -3 -10  -4    7.02    0.79 
  -3  10   4    7.99    0.96 
   3  10   4    6.28    0.84 
   3 -10  -4    7.47    0.64 
  -3  10  -4    7.12    0.88 
   4  10  -4    2.50    0.46 
  -4  10   4    2.55    0.61 
  -4 -10  -4    3.21    0.65 
  -4  10  -4    2.50    0.60 
   4  10   4    2.56    0.50 
   4 -10  -4    3.42    0.46 
   5  10  -4   18.99    1.16 
  -5 -10  -4   19.64    1.19 
  -5  10  -4   18.40    1.30 
   5  10   4   18.92    1.30 
   5 -10  -4   19.82    1.02 
  -6 -10  -4    1.70    0.69 
   6  10  -4    1.43    0.45 
   6  10  -4    0.82    0.48 
  -6  10  -4    0.77    0.61 
   6 -10  -4    0.76    0.44 
  -7  10   4    2.75    1.05 
   7  10  -4    3.91    0.58 
   7 -10  -4    3.90    0.62 
   7  10   4    3.19    0.77 
  -8 -10  -4    1.51    0.75 
  -8  10   4    1.34    0.79 
   8  10  -4    0.85    0.52 
  -8  10  -4    1.63    0.75 
   8  10   4    1.56    0.69 
   8 -10  -4    1.58    0.60 
  -9  10   4    3.21    0.97 
   9  10  -4    2.35    0.67 
  -9  10  -4    3.09    0.90 
   9  10   4    3.38    0.84 
   9 -10  -4    4.36    0.77 
  10  10  -4    0.19    0.64 
  10 -10  -4    0.66    0.77 
  10  10   4    1.06    0.81 
   0  11  -4    4.51    0.40 
   0  11   4    3.34    0.59 
   0  11  -4    3.71    0.62 
   0  11   4    4.83    0.73 
   0 -11  -4    3.81    0.40 
   0  11  -4    3.18    0.55 
  -1  11   4   26.69    1.32 
   1  11  -4   24.36    1.27 
  -1  11   4   24.88    1.39 
  -1 -11  -4   25.61    1.40 
  -1  11  -4   24.64    1.08 
   1  11   4   26.47    1.38 
   1  11   4   26.00    1.38 
   1 -11  -4   26.60    1.01 
  -1  11  -4   26.31    1.38 
  -2 -11  -4   47.67    2.03 
  -2  11   4   47.59    1.93 
  -2  11   4   47.79    2.07 
   2  11  -4   46.90    1.92 
  -2  11  -4   49.55    2.05 
  -2  11  -4   47.66    1.62 
   2 -11  -4   45.15    1.66 
   2  11   4   49.08    2.01 
  -3  11   4    5.06    0.80 
   3  11  -4    5.01    0.73 
  -3  11   4    4.48    0.78 
  -3 -11  -4    4.41    0.77 
   3 -11  -4    4.31    0.63 
  -3  11  -4    4.21    0.65 
  -4 -11  -4   20.67    1.29 
   4  11  -4   20.22    1.22 
  -4  11  -4   20.94    1.37 
   4 -11  -4   22.24    1.09 
   4  11   4   21.62    1.33 
   5  11  -4   11.91    0.99 
  -5  11   4   11.45    1.49 
   5 -11  -4   10.84    0.85 
  -5  11  -4   10.52    1.23 
   5  11   4    9.87    1.10 
   6  11  -4    0.63    0.45 
  -6  11  -4    0.44    0.63 
  -7  11   4    5.96    0.99 
  -7 -11  -4    8.66    1.18 
   7  11  -4    7.32    1.09 
   7  11   4    7.99    1.25 
   7 -11  -4    7.35    0.89 
   8  11  -4    1.88    0.63 
  -8  11   4    2.61    0.90 
   8  11   4    2.20    0.71 
  -8  11  -4    1.20    0.81 
   8 -11  -4    3.42    0.68 
  -9 -11  -4    2.07    0.96 
  -9  11   4    1.60    1.35 
   9  11  -4    0.60    0.81 
   9  11   4    1.16    1.07 
  -9  11  -4    0.14    0.82 
   9 -11  -4    1.27    0.68 
   0  12  -4   -0.08    0.31 
   0  12   4   -0.12    0.33 
   0  12  -4   -0.14    0.39 
   0  12   4   -0.55    0.44 
   0 -12  -4    0.28    0.23 
   1  12  -4    0.87    0.40 
  -1  12   4    1.42    0.41 
  -1  12  -4    1.30    0.48 
  -1  12  -4    1.06    0.33 
   1 -12  -4    1.76    0.31 
   1  12   4    0.72    0.49 
   1  12   4    1.61    0.43 
   2  12  -4   16.64    1.08 
  -2  12   4   19.05    1.14 
   2  12   4   18.49    1.22 
  -2  12  -4   18.37    0.85 
  -2  12  -4   18.67    1.23 
   2 -12  -4   17.71    0.88 
   3  12  -4    4.90    0.82 
   3 -12  -4    6.46    0.71 
  -3  12  -4    5.14    0.96 
   4  12  -4    2.85    0.51 
  -4  12   4    2.49    0.70 
   4  12   4    3.16    0.68 
   4 -12  -4    3.71    0.51 
  -4  12  -4    3.41    0.70 
  -5 -12  -4    0.72    0.65 
   5  12  -4    0.32    0.45 
   5 -12  -4    1.33    0.43 
  -5  12  -4    0.73    0.64 
   5  12   4    0.56    0.57 
  -6 -12  -4    1.25    0.72 
  -6  12   4    0.61    0.75 
   6  12  -4    0.42    0.48 
   6  12   4    0.65    0.60 
  -7  12   4    0.99    0.76 
   7  12  -4    1.38    0.57 
   7  12   4    0.39    0.61 
  -7  12  -4    0.58    0.90 
  -8 -12  -4    1.91    0.94 
   8  12  -4    1.89    0.69 
  -8  12   4    1.15    1.09 
  -8  12  -4    0.25    0.83 
   8  12   4    1.32    0.80 
   8 -12  -4    1.15    0.67 
   0  13   4    0.62    0.62 
   0  13   4    1.03    0.42 
   0  13  -4    0.83    0.39 
   0  13  -4   -0.12    0.55 
  -1  13   4    1.20    0.54 
   1  13  -4    1.38    0.40 
  -1  13   4    0.81    0.41 
   1  13  -4    1.73    0.55 
   1  13   4    0.94    0.48 
   1  13   4    1.19    0.55 
  -1  13  -4    0.07    0.57 
   1 -13  -4    1.75    0.34 
  -1  13  -4    1.39    0.36 
  -2  13   4    1.13    0.63 
  -2  13   4    1.22    0.43 
   2  13  -4    1.28    0.42 
   2 -13  -4    1.70    0.38 
   2  13   4    0.51    0.45 
  -2  13  -4    0.83    0.30 
  -2  13  -4    1.85    0.92 
   2  13   4    1.99    0.53 
  -3  13   4   15.33    1.38 
   3  13  -4   13.50    1.10 
  -3 -13  -4   13.17    1.21 
  -3  13   4   13.94    1.05 
   3  13   4   13.76    1.18 
  -3  13  -4   13.73    1.30 
   4  13  -4    0.74    0.46 
  -4  13   4   -0.30    0.70 
  -4 -13  -4   -0.05    0.67 
  -4  13  -4    0.06    0.65 
   4 -13  -4    0.03    0.38 
  -5 -13  -4    0.23    1.38 
  -5  13   4   -0.18    0.72 
   5 -13  -4    0.15    0.47 
   5  13   4   -0.22    0.52 
  -5  13  -4    0.11    0.71 
  -6 -13  -4    3.37    1.28 
  -6  13   4    1.78    0.90 
   6  13  -4    1.06    0.53 
   6 -13  -4    1.76    0.51 
   6  13   4    1.60    0.67 
  -7  13   4    0.14    0.84 
   7  13  -4    0.05    0.57 
  -7 -13  -4    0.32    0.87 
   7 -13  -4   -0.31    0.55 
  -7  13  -4   -0.48    0.92 
   7  13   4    0.92    0.65 
  -8 -13  -4    1.44    1.11 
   8  13  -4    1.01    0.67 
   8 -13  -4    1.06    0.68 
   8  13   4    1.07    0.74 
   0  14  -4    0.91    0.43 
   0  14  -4    2.37    0.72 
   0  14   4    1.09    0.46 
   1  14  -4    0.70    0.38 
  -1  14   4   -0.64    0.39 
   1  14   4   -0.26    0.45 
  -1  14  -4   -0.62    0.60 
  -2  14   4   -0.54    0.66 
  -2  14   4    0.10    0.39 
   2  14  -4    0.62    0.43 
   2 -14  -4    0.52    0.37 
   2  14   4    0.87    0.52 
   3  14  -4    1.31    0.49 
  -3  14   4    1.91    0.48 
  -3  14   4    0.38    0.70 
   3  14   4    1.20    0.62 
  -3  14  -4    1.06    0.79 
   3 -14  -4    1.08    0.52 
   4  14  -4    0.30    0.49 
  -4 -14  -4    1.47    0.87 
  -4  14   4    0.16    0.77 
  -4  14  -4   -0.39    0.72 
   4 -14  -4    1.04    0.43 
  -5  14   4    0.94    0.89 
  -5 -14  -4    1.73    0.89 
   5  14  -4    1.16    0.78 
  -5  14  -4    0.64    0.82 
   5 -14  -4    1.30    0.56 
  -6  14   4   -0.04    0.97 
  -6 -14  -4    1.54    0.93 
   6  14  -4   -0.66    0.56 
   6  14   4    0.37    0.68 
   6 -14  -4    0.15    0.51 
  -7  14   4    2.45    1.04 
  -7 -14  -4    1.52    1.01 
   7  14   4    2.53    0.83 
   7 -14  -4    1.61    0.66 
  -7  14  -4    1.23    2.10 
   0  15  -4   -0.74    0.63 
   0  15   4    0.28    0.74 
   0  15   4   -0.31    0.45 
  -1  15   4    0.34    0.70 
   1  15  -4    1.29    0.46 
   1  15  -4    2.32    0.75 
  -1  15   4    0.08    0.48 
   1  15   4    1.30    0.75 
  -1  15  -4    2.39    0.73 
  -1  15  -4    0.40    0.45 
   1  15   4    1.32    0.58 
   2  15  -4    0.80    0.47 
  -2  15   4   -0.34    0.78 
   2  15  -4    1.18    0.73 
  -2  15   4    0.04    0.47 
   2  15   4    0.50    0.72 
  -2  15  -4    0.60    0.67 
   2  15   4   -0.47    0.88 
  -3  15   4    0.86    0.85 
   3  15  -4    0.15    0.50 
  -3  15   4   -0.29    0.44 
  -3  15  -4    1.28    0.79 
   3  15   4   -1.33    0.81 
   3  15   4    1.31    0.66 
  -4  15   4    2.39    1.00 
   4  15  -4    2.34    0.60 
   4 -15  -4    3.18    0.53 
   4  15   4    3.43    0.75 
  -4  15  -4    1.81    0.90 
   5  15  -4   -0.39    0.58 
  -5  15  -4   -0.53    1.10 
  -6 -15  -4    1.73    1.01 
   6  15  -4    0.19    0.69 
   0  16   4   -0.31    0.87 
   0  16  -4   -0.59    0.79 
   0  16   4   -1.04    0.52 
   1  16  -4    2.78    0.88 
  -1  16   4    2.60    0.93 
  -1  16   4    1.71    0.64 
   1  16  -4    2.13    0.57 
  -1  16  -4    2.42    0.87 
   1  16   4    2.14    0.98 
  -2  16   4   -1.19    0.89 
  -2  16   4    0.35    0.62 
   2  16  -4   -0.75    0.51 
   2  16  -4    0.25    0.81 
   2  16   4    0.44    0.90 
   2  16   4    0.01    0.60 
  -2  16  -4   -0.08    0.80 
  -3  16   4   -0.05    0.51 
  -3  16   4    0.71    1.50 
   3  16  -4    0.70    0.60 
   3  16   4    0.11    0.67 
  -3  16  -4   -0.28    0.87 
   3  16   4   -0.45    0.93 
  -4  16   4    2.13    1.12 
   4  16  -4    1.76    0.66 
   4  16   4    1.69    0.74 
  -4  16  -4    1.03    1.93 
   0  17   4   -0.02    0.63 
   0  17  -4   -0.34    1.52 
   0  17   4    0.23    1.39 
  -1  17   4    1.39    1.09 
   1  17  -4    2.03    1.24 
   1  17  -4    1.32    0.62 
  -1  17   4    1.39    0.66 
   1  17   4    2.74    1.26 
   1  17   4    0.20    0.66 
  -2  17   4    0.34    0.94 
   2  17   4    0.73    0.71 
   0   0  -5   -0.49    0.21 
   0   0   5   -0.16    0.21 
   0   0  -5   -0.09    0.16 
  -1   0  -5  161.92    4.71 
   1   0  -5  160.38    4.64 
  -1   0   5  151.03    4.63 
   1   0   5  162.56    4.72 
   1   0  -5  150.59    4.67 
  -1   0  -5  151.65    4.72 
   1   0  -5  152.67    4.64 
   1   0   5  152.54    4.70 
  -1   0   5  153.40    4.63 
   2   0  -5   14.02    0.62 
  -2   0   5   14.46    0.65 
   2   0  -5   15.92    0.69 
   2   0  -5   14.14    0.53 
  -2   0  -5   14.17    0.53 
   2   0   5   15.53    0.56 
  -2   0   5   14.57    0.54 
   2   0   5   14.95    0.65 
  -2   0  -5   14.06    0.70 
  -3   0   5   68.17    2.03 
   3   0   5   71.73    2.14 
   3   0  -5   64.35    2.16 
   3   0   5   66.74    2.18 
  -3   0   5   67.51    2.22 
  -3   0  -5   67.16    2.12 
  -3   0  -5   66.48    2.26 
  -3   0  -5   65.50    2.17 
   4   0  -5    6.09    0.44 
  -4   0  -5    4.53    0.46 
  -4   0   5    4.01    0.54 
  -4   0  -5    4.11    0.55 
   4   0   5    5.43    0.59 
  -5   0  -5   19.50    0.91 
  -5   0   5   19.07    0.70 
  -5   0   5   19.98    0.69 
   5   0  -5   18.37    0.87 
  -5   0  -5   20.05    1.02 
  -5   0   5   18.01    1.00 
   5   0   5   19.11    1.07 
  -6   0   5    7.60    0.45 
  -6   0  -5    6.44    0.70 
  -6   0   5    5.90    0.88 
   6   0   5    8.45    0.65 
   6   0  -5    6.07    0.92 
   7   0  -5    4.87    0.59 
   7   0   5    7.56    0.71 
  -7   0   5    6.62    0.51 
  -7   0   5    5.45    0.81 
  -7   0  -5    6.30    0.81 
  -8   0   5    1.12    0.40 
   8   0  -5    1.68    0.40 
  -8   0   5    1.47    0.50 
   8   0   5    1.21    0.54 
  -8   0  -5    0.95    0.44 
  -8   0  -5    1.10    0.57 
   9   0  -5    0.93    0.34 
  -9   0   5    1.07    0.52 
  -9   0  -5   -0.17    0.57 
   9   0   5    0.23    0.41 
  -9   0  -5    0.77    0.49 
   9   0  -5    0.23    0.39 
 -10   0  -5    2.68    0.66 
 -10   0   5    1.31    0.59 
  10   0   5    0.55    0.46 
 -10   0  -5    1.07    0.77 
  10   0  -5    0.47    0.39 
  11   0  -5    1.06    0.59 
 -11   0  -5    0.43    0.86 
  11   0  -5    1.10    0.50 
 -11   0   5    1.58    0.70 
 -11   0  -5    2.86    0.84 
 -12   0  -5    0.39    1.64 
  12   0   5   -0.26    0.66 
  12   0  -5    1.15    0.57 
   0   1  -5    0.26    0.15 
   0  -1  -5    0.38    0.23 
   0   1   5    0.25    0.15 
   0  -1   5    0.63    0.22 
   0   1  -5    0.53    0.11 
   0   1  -5    0.72    0.23 
   0  -1  -5    0.38    0.18 
   0  -1  -5    0.62    0.11 
   1   1  -5   46.37    1.55 
  -1   1   5   48.64    1.55 
  -1  -1  -5   48.25    1.62 
   1   1  -5   46.11    1.51 
   1  -1   5   48.25    1.61 
   1  -1   5   49.65    1.58 
  -1  -1  -5   46.48    1.62 
  -1   1   5   47.64    1.54 
   1   1  -5   49.21    1.54 
   1  -1  -5   47.05    1.55 
   1   1   5   48.22    1.62 
  -1  -1   5   48.38    1.51 
   1  -1  -5   48.13    1.57 
  -1   1  -5   49.12    1.62 
   1  -1  -5   47.63    1.63 
  -1   1  -5   48.53    1.57 
   1  -1  -5   50.01    1.54 
   1   1   5   48.61    1.63 
   2   1  -5  120.08    3.69 
  -2   1   5  116.80    3.71 
  -2  -1  -5  118.21    3.77 
   2  -1   5  120.07    3.68 
   2   1  -5  123.43    3.71 
  -2  -1  -5  119.69    3.73 
   2  -1   5  124.30    3.61 
  -2   1   5  123.95    3.64 
  -2   1  -5  115.36    3.76 
   2  -1  -5  119.95    3.70 
  -2   1  -5  120.49    3.61 
   2   1   5  119.11    3.74 
   2   1   5  125.50    3.62 
   2  -1  -5  124.24    3.71 
   2  -1  -5  118.64    3.65 
  -2   1  -5  122.55    3.70 
  -2  -1   5  121.02    3.70 
   3  -1   5    5.02    0.41 
  -3   1   5    4.37    0.50 
   3   1  -5    4.82    0.38 
  -3   1   5    5.16    0.33 
  -3  -1  -5    4.66    0.50 
   3  -1   5    4.81    0.39 
   3   1   5    5.11    0.45 
   3  -1  -5    5.16    0.40 
  -3   1  -5    4.78    0.50 
   3   1   5    5.19    0.43 
  -3   1  -5    4.84    0.40 
  -3   1  -5    5.20    0.39 
  -3  -1   5    5.15    0.47 
  -4  -1  -5   76.43    2.59 
   4   1  -5   78.54    2.48 
  -4   1   5   74.53    2.56 
   4  -1   5   78.88    2.49 
   4  -1   5   73.81    2.44 
  -4   1   5   76.97    2.37 
  -4   1  -5   74.01    2.58 
  -4   1  -5   75.27    2.44 
   4   1   5   74.58    2.51 
  -4  -1   5   73.76    2.55 
  -4   1  -5   75.72    2.47 
   4  -1  -5   77.36    2.50 
   4   1   5   85.98    2.63 
  -5  -1  -5   11.03    0.80 
  -5   1   5   11.95    0.82 
  -5   1   5   12.52    0.57 
   5   1  -5   11.77    0.65 
  -5  -1  -5   12.13    0.71 
  -5   1  -5   11.45    0.74 
  -5  -1   5   10.37    0.79 
   5  -1  -5   10.96    0.67 
   5   1   5   11.56    0.72 
  -5   1  -5   11.70    0.80 
  -6  -1  -5   59.51    2.11 
  -6   1   5   56.13    2.25 
   6   1  -5   56.30    2.16 
   6  -1   5   59.55    2.01 
   6  -1  -5   59.04    2.07 
   6   1   5   58.43    2.09 
  -6   1  -5   58.17    2.12 
  -6   1  -5   57.75    2.36 
  -6  -1   5   56.33    2.33 
   7   1  -5    8.40    0.67 
   7  -1   5    9.57    0.73 
  -7  -1  -5    8.49    0.88 
  -7   1   5    6.96    0.94 
  -7   1   5    8.47    0.58 
  -7   1  -5    9.22    0.89 
   7  -1  -5    8.66    0.70 
   7   1   5   10.60    0.86 
  -7  -1   5    9.06    0.49 
  -7  -1   5    7.70    0.86 
  -8   1   5    2.82    0.54 
   8   1  -5    3.79    0.58 
   8   1  -5    4.78    0.59 
  -8   1   5    3.22    0.59 
   8  -1   5    3.55    0.49 
  -8  -1  -5    3.07    0.55 
  -8  -1  -5    4.17    0.72 
  -8  -1   5    3.23    0.46 
  -8  -1   5    4.04    0.74 
   8   1   5    3.03    0.51 
   8  -1  -5    3.45    0.49 
  -8   1  -5    4.17    0.78 
  -8   1  -5    3.95    0.74 
  -9  -1  -5   15.24    1.11 
   9   1  -5   13.05    0.94 
  -9   1   5   13.94    0.87 
   9  -1   5   13.81    1.17 
  -9  -1   5   11.95    1.38 
   9   1   5   15.15    1.05 
   9  -1  -5   17.79    0.98 
  -9  -1   5   14.43    0.75 
  -9   1  -5   16.03    1.18 
   9  -1  -5   13.64    1.01 
  10  -1   5    3.95    0.59 
 -10   1   5    3.73    0.67 
 -10   1   5    4.42    0.80 
  10   1  -5    4.51    0.82 
  10   1  -5    4.69    0.66 
 -10  -1  -5    4.68    0.86 
 -10  -1   5    6.69    1.15 
  10  -1  -5    2.55    0.75 
 -10   1  -5    4.38    0.72 
  10   1   5    2.74    0.60 
 -10   1  -5    4.86    0.93 
  11   1  -5    5.68    1.04 
  11   1  -5    3.49    0.68 
 -11  -1  -5    5.54    1.32 
 -11   1   5    7.64    1.32 
  11  -1   5    3.78    0.84 
  11   1   5    4.89    0.83 
 -11   1  -5    4.89    1.09 
  11  -1  -5    4.85    0.76 
 -12  -1  -5    1.99    0.97 
  12   1  -5    1.79    0.63 
  12   1  -5    2.92    0.71 
  12   1   5    1.46    1.01 
  12  -1  -5    3.20    1.35 
 -12   1  -5    0.52    1.00 
  12  -1  -5    2.48    0.65 
   0  -2  -5   14.40    0.66 
   0   2  -5   15.36    0.62 
   0   2   5   14.64    0.67 
   0   2   5   14.85    0.56 
   0   2   5   14.17    0.67 
   0  -2  -5   14.46    0.70 
   1   2  -5   36.54    1.25 
  -1  -2  -5   40.35    1.47 
  -1  -2  -5   37.21    1.35 
   1   2  -5   36.50    1.22 
  -1   2   5   38.81    1.30 
   1   2  -5   37.35    1.25 
  -1   2   5   37.44    1.27 
  -1   2  -5   38.68    1.26 
   1   2   5   36.73    1.34 
   1  -2  -5   38.12    1.27 
   1   2   5   41.31    1.47 
   1  -2  -5   36.58    1.29 
   1  -2  -5   37.37    1.27 
  -1   2  -5   37.06    1.19 
  -1   2  -5   37.31    1.32 
   2   2  -5  137.02    4.15 
   2   2  -5  140.08    4.19 
  -2   2   5  140.07    4.16 
  -2  -2  -5  136.15    4.26 
  -2   2   5  136.16    4.20 
   2  -2   5  139.13    4.13 
   2  -2   5  142.88    4.11 
   2  -2  -5  136.24    4.16 
  -2   2  -5  134.92    4.24 
   2  -2  -5  135.03    4.19 
   2  -2  -5  132.36    4.17 
  -2   2  -5  140.40    4.13 
  -2   2  -5  134.21    4.11 
   2   2   5  133.37    4.24 
   3   2  -5   84.36    2.64 
   3  -2   5   87.13    2.63 
  -3  -2  -5   81.65    2.75 
   3  -2   5   84.73    2.60 
  -3   2   5   85.76    2.62 
  -3   2   5   81.05    2.73 
  -3   2  -5   83.74    2.64 
   3   2   5   87.19    2.65 
  -3   2  -5   81.65    2.75 
   3   2   5   82.41    2.73 
   3  -2  -5   82.80    2.67 
  -3   2  -5   85.41    2.60 
  -4   2   5   38.34    1.31 
   4   2  -5   37.33    1.34 
   4  -2   5   37.32    1.29 
  -4  -2  -5   36.64    1.48 
  -4   2   5   36.80    1.48 
  -4   2  -5   37.22    1.47 
   4  -2  -5   38.90    1.39 
  -4   2  -5   38.44    1.29 
  -4  -2   5   37.50    1.45 
   4   2   5   38.09    1.44 
  -4   2  -5   38.27    1.38 
  -5  -2  -5   10.30    0.79 
   5   2  -5   10.87    0.62 
   5  -2   5   11.72    0.59 
  -5   2   5   10.81    0.86 
  -5   2   5   12.08    0.63 
   5  -2  -5   10.46    0.66 
   5   2   5   11.26    0.76 
  -5   2  -5   10.77    0.56 
  -5   2  -5   11.40    0.81 
  -5   2  -5   11.48    0.76 
  -5  -2   5   10.47    0.77 
   6   2  -5    2.33    0.40 
  -6   2   5    1.98    0.54 
   6  -2   5    1.82    0.30 
  -6  -2   5    1.12    0.46 
  -6   2  -5    1.48    0.45 
   6   2   5    2.33    0.42 
   6  -2  -5    1.84    0.39 
  -6   2  -5    1.98    0.58 
  -7  -2  -5   49.93    2.00 
  -7   2   5   47.21    2.04 
   7   2  -5   48.82    1.81 
   7  -2   5   51.42    1.78 
   7   2   5   50.79    1.98 
  -7  -2   5   46.82    1.98 
  -7   2  -5   48.28    1.99 
   7  -2  -5   46.57    1.84 
   8   2  -5    0.88    0.31 
  -8   2   5    1.13    0.43 
   8  -2   5    0.81    0.37 
   8   2  -5   -0.05    0.34 
  -8   2   5    0.92    0.42 
  -8  -2  -5    1.22    0.58 
   8  -2  -5    1.10    0.42 
  -8   2  -5    1.23    0.59 
  -8   2  -5    1.16    0.47 
   8   2   5    0.57    0.39 
  -8  -2   5    1.33    0.46 
   9  -2   5    4.26    0.59 
  -9   2   5    4.08    0.71 
  -9   2   5    4.48    1.11 
  -9  -2  -5    5.15    0.83 
  -9   2  -5    4.73    0.69 
   9  -2  -5    3.75    0.58 
   9   2   5    4.87    0.85 
  -9  -2   5    4.12    0.76 
 -10   2   5    4.76    0.74 
  10   2  -5    5.12    0.87 
  10   2  -5    4.62    0.63 
 -10   2   5    4.13    0.78 
  10  -2   5    4.38    0.60 
 -10  -2  -5    5.54    0.93 
  10  -2  -5    3.80    0.65 
 -10   2  -5    4.28    0.95 
 -10   2  -5    3.99    0.71 
  11   2  -5    0.21    0.58 
  11   2  -5    1.55    0.55 
 -11   2   5    2.42    0.74 
  11  -2   5    0.68    0.48 
  11  -2  -5    0.44    0.47 
 -11   2  -5    2.54    0.73 
  11   2   5    0.56    0.56 
 -11   2  -5    1.43    0.95 
  11  -2  -5    1.20    0.60 
  12   2  -5    5.29    0.81 
  12   2  -5    4.85    0.79 
 -12  -2  -5    7.75    1.46 
  12  -2  -5    4.47    0.83 
  12   2   5    4.49    0.86 
  12  -2  -5    7.61    1.18 
 -12   2  -5    8.72    1.62 
   0   3   5   97.58    3.14 
   0  -3  -5   98.66    3.04 
   0  -3  -5  100.31    3.12 
   0   3   5   99.61    3.04 
  -1  -3  -5  239.20    7.32 
  -1   3   5  234.06    7.24 
  -1   3   5  239.31    7.31 
  -1   3   5  251.11    7.28 
   1   3   5  233.79    7.32 
   1  -3  -5  245.14    7.23 
   1  -3  -5  254.68    7.29 
   1  -3  -5  237.74    7.28 
  -1   3  -5  249.68    7.21 
  -1   3  -5  241.45    7.31 
  -2   3   5  217.11    6.73 
   2  -3   5  227.94    6.65 
  -2   3   5  223.66    6.71 
  -2  -3  -5  215.90    6.78 
   2   3  -5  220.06    6.71 
   2   3  -5  214.32    6.64 
  -2   3  -5  232.39    6.62 
  -2   3  -5  226.69    6.79 
   2   3   5  217.43    6.79 
   2  -3  -5  220.77    6.71 
   2  -3  -5  223.08    6.70 
   2  -3  -5  247.21    6.84 
  -2   3  -5  215.07    6.65 
  -3   3   5  131.34    4.24 
   3   3  -5  135.91    4.12 
   3  -3   5  139.26    4.15 
   3  -3   5  137.64    4.06 
  -3  -3  -5  131.40    4.26 
  -3   3   5  136.24    4.16 
  -3   3  -5  133.00    4.15 
   3   3   5  138.88    4.16 
  -3   3  -5  132.45    4.26 
   3  -3  -5  134.44    4.18 
  -3   3  -5  137.49    4.05 
  -4  -3  -5   28.28    1.25 
  -4   3   5   28.04    1.28 
   4  -3   5   30.00    1.00 
   4   3  -5   28.39    1.08 
  -4   3  -5   28.98    1.24 
   4   3   5   29.23    1.23 
  -4   3  -5   29.66    0.98 
   4  -3  -5   28.69    1.13 
  -4   3  -5   30.18    1.18 
  -5  -3  -5   16.44    0.98 
   5   3  -5   16.09    0.77 
   5  -3   5   16.39    0.69 
  -5   3   5   16.23    1.03 
  -5   3  -5   18.84    0.66 
  -5   3  -5   16.11    0.93 
   5   3   5   16.69    0.93 
  -5   3  -5   16.80    0.98 
  -6   3   5  125.11    4.19 
   6  -3   5  128.14    3.86 
  -6  -3  -5  124.07    4.19 
   6   3  -5  126.85    3.96 
  -6   3  -5  123.78    4.07 
  -6   3  -5  124.54    4.15 
   6  -3  -5  123.99    4.02 
  -7   3   5  134.95    4.61 
  -7  -3  -5  136.95    4.53 
   7   3  -5  145.89    4.47 
   7  -3  -5  133.25    4.42 
  -7   3  -5  133.98    4.50 
  -7   3  -5  134.00    4.56 
   7   3   5  139.85    4.53 
  -8  -3  -5    6.23    0.82 
   8   3  -5    6.40    0.67 
   8  -3   5    6.08    0.63 
   8   3  -5    4.15    0.60 
  -8   3  -5    4.74    0.76 
  -8   3  -5    6.25    0.88 
   8   3   5    4.09    0.76 
  -9  -3  -5   13.46    1.16 
   9  -3   5   12.03    0.89 
   9   3  -5   13.76    0.91 
  -9   3   5   11.85    1.33 
   9   3  -5   15.63    1.26 
  -9   3   5   12.60    0.94 
  -9   3  -5   13.02    1.15 
   9   3   5   11.59    1.07 
   9  -3  -5   11.99    0.93 
 -10  -3  -5    5.47    1.03 
  10  -3   5    4.01    0.59 
  10   3  -5    7.71    1.17 
 -10   3   5    5.03    1.01 
  10   3  -5    5.26    0.64 
 -10   3   5    3.42    0.79 
  10   3   5    4.17    0.68 
 -10   3  -5    5.68    1.02 
  10  -3  -5    4.78    0.72 
 -10   3  -5    6.98    1.11 
  11   3  -5    3.17    0.65 
 -11   3   5    4.83    0.88 
 -11  -3  -5    2.33    1.22 
  11  -3  -5    4.59    0.72 
 -11   3  -5    3.34    1.06 
  11  -3  -5    4.09    0.62 
  11   3   5    2.70    0.81 
   0  -4  -5   96.70    2.96 
   0   4   5   95.62    3.01 
   0  -4  -5   95.00    3.07 
   0   4   5   96.52    3.08 
  -1  -4  -5   31.00    1.22 
  -1   4   5   31.25    1.19 
  -1   4   5   32.06    1.16 
   1  -4  -5   31.53    1.16 
  -1   4  -5   31.27    1.10 
   1  -4  -5   30.48    1.09 
   1  -4  -5   30.85    1.18 
   1   4   5   30.19    1.21 
  -2   4   5  117.85    3.78 
   2   4  -5  119.34    3.65 
  -2  -4  -5  117.12    3.82 
  -2   4  -5  120.57    3.71 
   2  -4  -5  121.60    3.72 
  -2   4  -5  125.36    3.61 
   2  -4  -5  121.08    3.77 
   2   4   5  119.51    3.83 
   3   4  -5    5.35    0.31 
   3   4  -5    5.09    0.37 
  -3   4   5    5.50    0.62 
  -3  -4  -5    4.89    0.56 
   3  -4  -5    4.55    0.43 
  -3   4  -5    4.85    0.50 
  -4   4   5    5.99    0.71 
   4   4  -5    5.39    0.43 
  -4  -4  -5    5.32    0.62 
  -4   4  -5    5.37    0.62 
   4  -4  -5    5.59    0.48 
  -4   4  -5    6.54    0.71 
   4   4   5    6.21    0.62 
   5   4  -5   22.82    0.91 
  -5  -4  -5   21.72    1.15 
  -5   4   5   19.54    1.30 
  -5   4  -5   22.27    1.62 
   5   4   5   22.26    1.15 
  -5   4  -5   22.85    1.13 
   6   4  -5    7.52    0.61 
  -6   4   5    6.61    0.94 
   6   4  -5    7.14    0.57 
   6  -4   5    6.32    0.46 
  -6  -4  -5    5.97    0.82 
   6   4   5    7.12    0.79 
  -6   4  -5    5.10    0.76 
   6  -4  -5    7.25    0.63 
  -6   4  -5    7.05    0.88 
   7   4  -5   37.40    1.46 
   7   4  -5   36.02    1.55 
  -7  -4  -5   36.85    1.66 
  -7   4   5   36.90    1.92 
   7  -4   5   36.64    1.32 
  -7   4  -5   37.89    1.69 
  -7   4  -5   35.00    1.68 
   7   4   5   38.78    1.69 
   8   4  -5    8.38    0.69 
   8  -4   5    6.95    0.62 
  -8  -4  -5    8.37    0.88 
  -8   4  -5    7.35    0.93 
   8   4   5    7.55    0.90 
  -8   4  -5    7.64    0.93 
   9   4  -5    6.17    0.73 
  -9   4   5    5.31    0.96 
  -9   4   5    6.09    1.10 
   9   4  -5    4.97    0.77 
  -9   4  -5    6.00    1.02 
  -9   4  -5    5.10    0.90 
  10   4  -5    2.18    0.52 
 -10  -4  -5    2.67    0.82 
 -10   4   5    2.84    0.79 
 -10   4   5    2.71    0.66 
  10   4  -5    2.28    0.51 
  10  -4  -5    3.21    0.50 
  10   4   5    1.93    0.61 
 -10   4  -5    2.87    0.68 
  10  -4  -5    2.17    0.61 
 -11  -4  -5    1.98    0.93 
  11   4  -5    2.38    0.58 
 -11   4   5    2.53    0.84 
 -11   4   5    2.52    0.89 
  11   4  -5    2.42    0.65 
 -11   4  -5    3.81    0.82 
 -11   4  -5    3.32    1.05 
  11  -4  -5    3.10    0.55 
  11  -4  -5    3.43    0.71 
   0  -5  -5   30.91    1.08 
   0  -5  -5   30.95    1.24 
   0   5   5   30.82    1.23 
   0   5   5   31.22    1.18 
  -1  -5  -5   94.06    3.11 
  -1  -5  -5   94.67    2.93 
  -1   5   5   93.97    3.07 
  -1   5   5   92.85    3.04 
   1   5   5   94.69    3.11 
  -1   5  -5   94.66    3.01 
   1  -5  -5   99.49    3.11 
   1  -5  -5   97.02    2.97 
  -2   5   5   70.84    2.41 
  -2  -5  -5   69.44    2.46 
  -2   5   5   69.87    2.42 
   2   5  -5   71.33    2.25 
   2   5  -5   71.64    2.27 
   2  -5  -5   73.89    2.43 
   2  -5  -5   73.45    2.33 
   2   5   5   72.07    2.47 
  -2   5  -5   75.95    2.20 
  -2   5  -5   72.32    2.36 
   3   5  -5   89.57    2.66 
   3   5  -5   83.73    2.68 
  -3  -5  -5   83.88    2.90 
  -3   5   5   86.35    2.90 
   3  -5  -5   86.44    2.78 
   3   5   5   87.40    2.92 
  -3   5  -5   87.07    2.82 
   4   5  -5    7.63    0.60 
  -4   5   5    7.73    0.80 
  -4  -5  -5    7.41    0.71 
   4   5  -5    7.60    0.47 
   4   5  -5    8.21    0.41 
   4   5   5    7.53    0.74 
  -4   5  -5    7.83    0.69 
   4  -5  -5    7.13    0.57 
   5   5  -5   33.14    1.40 
  -5   5   5   35.23    1.65 
   5   5  -5   34.73    1.27 
   5  -5  -5   35.60    1.41 
  -5   5  -5   35.57    1.50 
   5   5   5   37.67    1.57 
   6   5  -5    3.82    0.53 
   6   5  -5    4.45    0.50 
  -6   5   5    4.08    0.68 
  -6  -5  -5    4.28    0.71 
  -6   5  -5    4.09    0.70 
   6  -5  -5    4.17    0.55 
   6   5   5    4.44    0.74 
  -7   5   5   37.33    1.84 
   7   5  -5   32.99    1.87 
  -7  -5  -5   38.19    1.66 
  -7   5  -5   35.84    1.68 
  -7   5  -5   35.53    1.68 
   7  -5  -5   37.25    1.55 
   7   5   5   37.62    1.70 
  -8  -5  -5    5.95    0.84 
   8   5  -5    5.16    0.64 
  -8   5  -5    5.89    0.92 
   8   5   5    4.34    0.83 
   9   5  -5   11.77    0.86 
   9   5  -5   11.76    1.10 
  -9   5  -5   13.52    1.25 
  -9   5  -5   13.85    1.23 
   9   5   5   12.67    1.18 
 -10   5   5    3.57    0.86 
 -10  -5  -5    5.78    1.06 
 -10   5   5    4.18    0.74 
  10   5  -5    3.53    0.62 
  10   5  -5    3.60    0.57 
  10   5   5    3.57    0.77 
  10  -5  -5    3.69    0.66 
 -10   5  -5    4.63    1.05 
 -11  -5  -5    8.53    1.71 
  11   5  -5    4.65    0.70 
 -11   5   5    4.86    1.18 
 -11   5   5    5.80    1.03 
  11   5  -5    6.93    1.19 
 -11   5  -5    7.44    1.27 
  11   5   5    3.95    0.86 
  11  -5  -5    5.85    0.94 
  11  -5  -5    4.58    0.75 
 -11   5  -5    8.61    1.44 
   0   6  -5    9.49    0.45 
   0   6   5    8.83    0.61 
   0   6   5    8.61    0.63 
   0  -6  -5    7.95    0.63 
   0  -6  -5    8.95    0.46 
  -1   6   5    4.04    0.50 
  -1   6   5    4.21    0.50 
  -1  -6  -5    3.45    0.53 
  -1  -6  -5    4.62    0.34 
   1   6  -5    4.15    0.35 
  -1   6  -5    4.39    0.51 
  -1   6  -5    4.64    0.29 
   1  -6  -5    4.64    0.55 
   1   6   5    4.22    0.56 
   1  -6  -5    4.61    0.38 
  -2  -6  -5   39.87    1.54 
   2   6  -5   38.57    1.27 
  -2   6   5   38.20    1.46 
  -2   6   5   37.98    1.50 
   2   6  -5   38.07    1.36 
   2   6  -5   39.39    1.40 
   2  -6  -5   38.41    1.36 
  -2   6  -5   37.52    1.43 
   2   6   5   37.52    1.53 
  -2   6  -5   38.84    1.21 
   3   6  -5   10.28    0.56 
  -3   6   5    9.82    0.79 
  -3  -6  -5    8.65    0.76 
   3   6  -5    9.92    0.60 
   3   6  -5    9.48    0.47 
   3  -6  -5    8.91    0.59 
  -3   6  -5    9.28    0.71 
   3   6   5    9.13    0.78 
   4   6  -5   15.61    1.29 
   4   6  -5   20.15    0.78 
   4   6  -5   18.82    0.76 
   4  -6  -5   18.49    0.91 
  -4   6  -5   19.72    1.04 
   4   6   5   19.10    1.10 
   5   6  -5    4.32    0.43 
  -5  -6  -5    4.57    0.75 
   5   6  -5    5.15    0.54 
   5   6  -5    4.02    0.44 
  -5   6   5    3.76    0.64 
   5  -6  -5    3.45    0.46 
  -5   6  -5    4.90    0.85 
   5   6   5    4.39    0.72 
   6   6  -5   13.43    0.87 
   6   6  -5   11.53    0.69 
  -6   6   5   13.00    1.17 
  -6  -6  -5   12.25    0.98 
   6   6   5   11.84    0.96 
   6  -6  -5   12.90    0.80 
  -6   6  -5   13.02    1.12 
  -7   6   5    6.82    1.02 
  -7  -6  -5    6.49    0.83 
   7   6  -5    6.32    0.65 
  -7   6  -5    6.34    0.91 
  -7   6  -5    6.29    0.85 
   7  -6  -5    6.40    0.68 
  -8  -6  -5    1.85    0.64 
   8   6  -5    1.11    0.36 
  -8   6   5    1.24    0.61 
  -8   6  -5    1.61    0.72 
   8  -6  -5    1.34    0.49 
  -8   6  -5    1.73    0.59 
   9   6  -5    3.84    0.62 
   9   6  -5    3.86    0.53 
  -9   6   5    3.60    0.82 
   9  -6  -5    3.91    0.68 
  -9   6  -5    5.06    1.50 
  -9   6  -5    4.14    0.76 
   9   6   5    4.12    0.73 
  10   6  -5    1.61    0.49 
 -10   6   5    2.25    0.82 
 -10  -6  -5    3.24    0.95 
  10   6  -5    1.23    0.54 
  10   6   5    0.86    0.67 
 -10   6  -5    4.16    1.56 
  10  -6  -5    2.34    0.62 
 -10   6  -5    1.54    0.74 
 -11   6   5    3.38    1.39 
  11   6  -5    3.86    1.16 
  11   6   5    2.06    0.81 
 -11   6  -5    4.96    1.24 
  11  -6  -5    2.20    1.04 
   0   7   5   15.18    0.84 
   0   7  -5   15.39    0.66 
   0   7   5   15.73    0.86 
   0  -7  -5   15.62    0.65 
   0  -7  -5   14.27    0.88 
  -1   7   5   17.13    0.92 
  -1  -7  -5   16.51    0.94 
  -1  -7  -5   17.19    0.79 
   1   7  -5   17.63    0.77 
  -1   7   5   17.88    0.91 
  -1   7  -5   17.24    0.86 
   1  -7  -5   17.51    0.73 
  -1   7  -5   17.91    0.68 
   1   7   5   17.68    0.90 
   1   7   5   17.06    0.95 
   1  -7  -5   16.89    1.02 
  -2  -7  -5   11.41    0.53 
  -2   7   5   12.71    0.83 
   2   7  -5   11.99    0.51 
  -2   7   5   11.67    0.75 
  -2  -7  -5   12.43    0.86 
   2   7  -5   10.57    0.64 
   2  -7  -5   10.87    0.61 
  -2   7  -5   11.95    0.76 
   2   7   5   11.62    0.87 
  -2   7  -5   12.45    0.49 
  -3   7   5    0.49    0.46 
   3   7  -5    0.34    0.18 
   3   7  -5    0.09    0.23 
   3  -7  -5    0.37    0.25 
  -3   7  -5    0.23    0.33 
   4   7  -5   21.37    0.82 
  -4   7   5   22.49    1.27 
   4   7  -5   20.74    0.92 
   4   7  -5   20.95    1.03 
  -4  -7  -5   19.98    1.52 
  -4   7  -5   21.67    1.19 
   4   7   5   21.01    1.18 
   4  -7  -5   19.41    1.09 
  -5   7   5    5.67    0.95 
  -5  -7  -5    5.30    0.75 
   5   7  -5    5.43    0.63 
   5   7  -5    4.84    0.56 
   5   7  -5    6.02    0.61 
   5   7   5    5.41    0.80 
   5  -7  -5    4.88    0.59 
  -6   7   5   19.32    1.43 
   6   7  -5   21.53    1.10 
  -6  -7  -5   18.69    1.14 
   6   7  -5   18.96    0.88 
   6   7  -5   17.09    0.84 
   6   7   5   18.92    1.22 
  -6   7  -5   18.66    1.21 
   6  -7  -5   19.74    1.02 
  -7  -7  -5    0.51    0.53 
   7   7  -5    0.65    0.38 
  -7   7  -5    0.15    0.51 
   8   7  -5    8.59    0.71 
  -8   7   5    8.12    1.24 
  -8   7  -5    8.93    1.09 
   8  -7  -5    8.41    0.87 
  -8   7  -5    7.33    1.08 
   8   7   5    6.42    1.05 
  -9   7   5    1.50    0.72 
  -9  -7  -5    2.04    0.74 
   9   7  -5    0.50    0.40 
   9   7  -5    1.47    0.48 
   9  -7  -5    1.26    0.58 
  -9   7  -5    1.55    0.82 
  -9   7  -5    0.97    0.63 
 -10   7   5    5.66    1.02 
  10   7  -5    3.39    0.67 
  10   7  -5    4.93    0.78 
 -10   7  -5    5.38    1.15 
  10  -7  -5    5.27    0.79 
  10   7   5    2.79    0.78 
 -10   7  -5    4.64    0.88 
 -11   7   5    2.97    0.97 
 -11   7   5    2.29    0.95 
  11   7  -5    0.72    0.74 
 -11  -7  -5    0.15    0.92 
  11   7  -5    0.99    0.69 
 -11   7  -5    0.45    0.77 
 -11   7  -5    3.94    1.83 
  11  -7  -5    0.64    0.71 
  11   7   5   -0.09    1.11 
   0   8   5   76.19    2.67 
   0   8   5   76.64    2.67 
   0   8  -5   74.00    2.39 
   0   8  -5   76.60    2.48 
   0  -8  -5   79.21    2.43 
   1   8  -5   63.86    2.16 
  -1  -8  -5   59.78    2.52 
  -1   8   5   64.67    2.34 
  -1  -8  -5   65.41    2.04 
  -1   8   5   64.65    2.28 
  -1   8  -5   65.32    2.07 
  -1   8  -5   61.86    2.26 
   1   8   5   65.04    2.35 
   1  -8  -5   64.36    2.09 
   1   8   5   65.52    2.32 
   2   8  -5   31.73    1.32 
  -2  -8  -5   34.36    1.16 
  -2   8   5   33.66    1.41 
   2   8  -5   33.78    1.13 
  -2  -8  -5   33.58    1.48 
   2  -8  -5   32.62    1.25 
  -2   8  -5   37.97    1.20 
   2   8   5   34.09    1.54 
  -2   8  -5   34.24    1.45 
  -3   8   5   15.94    1.20 
  -3  -8  -5   14.18    0.95 
   3   8  -5   14.91    0.65 
   3   8  -5   14.97    1.29 
   3  -8  -5   14.86    0.77 
  -3   8  -5   15.69    1.02 
   4   8  -5   17.26    0.96 
  -4  -8  -5   18.88    1.12 
   4   8  -5   18.49    0.73 
  -4   8   5   18.91    1.18 
   4  -8  -5   17.18    0.98 
   4   8   5   18.44    1.15 
  -4   8  -5   18.69    1.13 
   5   8  -5   12.06    0.61 
  -5  -8  -5   11.88    0.93 
  -5   8   5   12.56    1.15 
   5   8  -5   11.89    0.83 
   5  -8  -5   12.56    0.80 
   6   8  -5    1.56    0.39 
  -6  -8  -5    2.15    0.75 
   6   8  -5    1.86    0.33 
  -6   8   5    1.17    0.53 
   6  -8  -5    1.09    0.39 
  -6   8  -5    0.93    0.54 
   7   8  -5    5.51    0.84 
  -7  -8  -5    7.16    0.92 
  -7   8   5    7.20    1.21 
   7   8  -5    9.29    0.92 
  -7   8  -5    5.76    1.03 
   7   8   5    7.30    1.00 
   8   8  -5   -0.02    0.38 
  -8   8   5   -0.72    0.83 
   8   8  -5   -0.37    0.39 
  -8   8  -5    0.79    0.61 
   8  -8  -5    0.54    0.50 
   9   8  -5    2.83    0.62 
  -9  -8  -5    3.55    0.86 
  -9   8   5    2.98    0.85 
   9   8  -5    3.39    0.48 
   9  -8  -5    2.83    0.64 
  -9   8  -5    4.03    0.98 
  10   8  -5    0.93    0.55 
  10   8  -5    1.56    0.52 
 -10  -8  -5    1.78    0.87 
 -10   8   5   -0.98    0.86 
  10  -8  -5    0.77    0.68 
 -10   8  -5    1.69    1.01 
  10   8   5   -0.51    0.68 
   0  -9  -5    9.42    0.54 
   0  -9  -5    8.97    0.83 
   0   9   5    9.05    0.84 
   0   9  -5    9.00    0.61 
   0   9  -5    9.46    0.53 
   0   9   5    8.70    0.97 
  -1   9   5    5.04    0.77 
   1   9  -5    4.77    0.51 
   1   9  -5    4.02    0.38 
  -1  -9  -5    4.97    0.71 
  -1   9   5    4.81    0.71 
  -1  -9  -5    4.74    0.39 
   1   9  -5    4.91    0.36 
  -1   9  -5    4.67    0.47 
   1  -9  -5    4.91    0.45 
   1   9   5    4.88    0.74 
   1   9   5    4.48    0.69 
  -2   9   5    1.90    0.41 
   2   9  -5    2.00    0.22 
   2   9  -5    2.01    0.37 
  -2   9   5    1.91    0.51 
  -2  -9  -5    2.83    0.33 
  -2  -9  -5    2.28    0.56 
   2   9   5    1.67    0.44 
  -2   9  -5    2.17    0.55 
  -2   9  -5    2.81    0.34 
   2  -9  -5    1.95    0.33 
  -3  -9  -5    2.63    0.35 
  -3  -9  -5    3.03    0.34 
  -3   9   5    2.27    0.55 
  -3  -9  -5    2.85    0.58 
   3   9  -5    2.63    0.30 
   3   9  -5    2.20    0.38 
   3  -9  -5    2.38    0.41 
  -3   9  -5    4.15    0.77 
  -4  -9  -5   11.85    0.95 
   4   9  -5   11.59    0.81 
  -4  -9  -5   10.21    0.97 
  -4   9   5   12.74    1.07 
   4   9  -5   12.30    0.54 
   4   9   5   10.78    1.01 
  -4   9  -5   11.88    1.03 
   4  -9  -5   12.55    0.78 
  -5  -9  -5   10.75    0.96 
   5   9  -5   10.75    0.93 
   5   9  -5    9.80    0.60 
  -5   9   5    9.85    1.04 
   5  -9  -5   11.93    0.77 
  -6  -9  -5   13.10    1.06 
   6   9  -5   12.16    0.67 
   6   9  -5   11.41    0.94 
  -6   9  -5   14.19    1.25 
   6  -9  -5   12.68    0.90 
  -7   9   5   20.60    1.58 
   7   9  -5   19.66    0.93 
   7   9  -5   22.33    1.29 
   7  -9  -5   20.48    1.22 
  -7   9  -5   18.57    1.44 
   7   9   5   18.69    1.42 
   8   9  -5    0.80    0.42 
  -8   9   5    1.00    0.76 
   8   9  -5    1.58    0.45 
  -8   9  -5    0.61    0.65 
   8  -9  -5    2.81    0.68 
   8   9   5    0.23    0.57 
  -9   9   5    8.96    1.57 
   9   9  -5    8.51    1.15 
   9   9  -5    8.49    0.80 
   9   9   5    8.08    1.46 
  -9   9  -5   11.83    1.47 
  -9   9  -5    7.27    1.05 
   9  -9  -5    9.54    1.11 
 -10   9   5    1.86    1.01 
 -10  -9  -5    4.61    1.03 
  10   9  -5    3.14    0.79 
 -10   9  -5    2.88    0.86 
   0  10  -5    9.00    0.71 
   0  10  -5    9.32    0.58 
   0 -10  -5    9.42    0.55 
   0  10  -5    8.63    0.83 
   0  10   5   11.05    0.91 
   0  10   5    8.39    0.91 
   0 -10  -5    9.39    0.90 
  -1 -10  -5  117.60    3.57 
  -1 -10  -5  120.86    4.03 
   1  10  -5  115.55    3.53 
   1  10  -5  119.66    3.82 
   1  10  -5  117.88    3.54 
  -1  10   5  118.75    3.99 
  -1  10   5  113.45    4.09 
   1  10   5  116.09    3.96 
  -1  10  -5  115.35    3.93 
   1 -10  -5  116.80    3.64 
  -1  10  -5  113.90    3.66 
   1  10   5  118.82    3.97 
  -2 -10  -5   21.32    0.79 
  -2  10   5   21.71    1.28 
  -2  10   5   18.04    1.29 
   2  10  -5   22.49    1.23 
  -2 -10  -5   23.16    1.25 
  -2  10  -5   19.63    1.21 
   2 -10  -5   19.49    0.93 
   2  10   5   21.16    1.22 
  -2  10  -5   21.32    0.83 
  -3 -10  -5    0.41    0.27 
  -3 -10  -5    0.34    0.21 
  -3 -10  -5    0.68    0.49 
  -3  10   5   -0.28    0.49 
  -3  10   5    0.15    0.38 
   3 -10  -5    0.15    0.33 
  -3  10  -5    0.50    0.44 
   3  10   5    0.10    0.38 
   4  10  -5   14.63    0.94 
  -4  10   5   13.82    1.13 
  -4 -10  -5   14.55    1.03 
  -4 -10  -5   13.91    0.65 
   4  10   5   16.21    1.14 
  -4  10  -5   14.84    1.26 
   4 -10  -5   14.88    0.88 
   5  10  -5    2.41    0.36 
  -5 -10  -5    2.57    0.74 
   5  10   5    1.20    0.66 
   5 -10  -5    2.67    0.44 
   6  10  -5   10.29    0.93 
   6  10  -5    9.76    0.57 
  -6  10   5   10.22    1.24 
  -6  10  -5   10.03    1.21 
   7  10  -5    0.39    0.35 
  -7  10   5   -0.35    0.64 
   7  10  -5    0.55    0.40 
  -7 -10  -5    1.70    0.74 
   7  10   5    0.69    0.55 
  -7  10  -5   -0.61    0.61 
   7 -10  -5   -0.57    0.44 
  -8 -10  -5    0.68    0.89 
   8  10  -5    0.23    0.48 
  -8  10   5    0.37    0.79 
   8 -10  -5    0.02    0.55 
   8  10   5   -0.30    0.59 
  -8  10  -5   -0.02    0.74 
   9  10  -5    2.71    0.72 
  -9  10   5    1.38    0.96 
  -9 -10  -5    4.80    1.07 
  -9  10  -5    1.25    0.84 
  -9  10  -5    4.40    1.19 
   9  10   5    1.78    0.76 
   9 -10  -5    2.89    0.72 
   0  11  -5    6.16    0.80 
   0  11  -5    6.19    0.67 
   0  11  -5    5.74    0.51 
   0  11   5    6.12    0.74 
   0  11   5    7.13    0.89 
   0 -11  -5    6.97    0.50 
  -1  11   5    0.73    0.43 
  -1 -11  -5    0.26    0.23 
  -1  11   5    0.52    0.36 
   1  11  -5   -0.32    0.35 
   1  11   5    0.05    0.37 
  -1  11  -5   -0.10    0.27 
   1  11   5    0.42    0.42 
   1 -11  -5    0.13    0.27 
  -1  11  -5    0.60    0.42 
  -2  11   5   17.44    1.11 
  -2  11   5   18.42    1.25 
   2  11  -5   19.23    1.06 
  -2 -11  -5   18.09    1.19 
   2  11   5   17.64    1.16 
   2 -11  -5   15.54    0.84 
  -2  11  -5   16.67    1.13 
  -3  11   5   10.49    0.90 
  -3 -11  -5    9.36    1.12 
  -3  11   5    6.95    1.20 
   3  11  -5   10.11    0.85 
   3  11   5   11.06    1.01 
  -3  11  -5   10.16    1.27 
   4 -11  -5    3.06    0.47 
  -4  11  -5    3.34    1.02 
   5  11  -5    2.93    0.52 
  -5  11   5    3.36    0.76 
  -5  11  -5    2.81    0.78 
   5 -11  -5    3.96    0.60 
   5  11   5    3.44    0.66 
   6  11  -5    2.05    0.60 
  -6 -11  -5    2.66    0.73 
  -6  11   5   -0.25    0.90 
   6  11   5    1.03    0.61 
  -6  11  -5    1.89    0.72 
  -7 -11  -5   -0.75    0.73 
  -7  11   5   -0.21    0.69 
   7  11  -5    0.10    0.46 
   7 -11  -5   -0.03    0.52 
   7  11   5   -0.02    0.54 
  -8  11   5    2.87    0.94 
  -8 -11  -5    5.25    1.03 
   8 -11  -5    2.40    0.65 
  -8  11  -5    3.59    0.87 
   8  11   5    1.23    0.72 
  -9 -11  -5    3.43    1.14 
  -9  11   5    1.02    0.95 
   9  11  -5    1.79    0.69 
  -9  11  -5    2.55    1.52 
   9  11   5    0.64    0.76 
  -9  11  -5    0.95    0.85 
   9 -11  -5    2.40    0.71 
   0  12   5    1.04    0.42 
   0  12  -5    1.41    0.36 
   0 -12  -5    2.08    0.31 
   0  12   5    2.43    0.90 
   0  12  -5    1.38    0.46 
  -1  12   5    5.05    0.76 
   1  12  -5    3.46    0.51 
   1  12   5    2.60    0.90 
  -1  12  -5    5.75    0.87 
   1  12   5    4.15    0.68 
   1 -12  -5    4.01    0.52 
  -1  12  -5    4.58    0.59 
   2  12  -5    5.85    0.80 
  -2  12   5    6.24    0.83 
   2  12   5    6.97    0.95 
   2 -12  -5    6.51    0.62 
  -2  12  -5    5.45    0.91 
  -3  12   5   10.51    0.91 
   3  12  -5    7.63    0.89 
  -3 -12  -5    9.59    1.64 
  -3  12   5   10.10    1.38 
   3 -12  -5    8.12    0.78 
  -3  12  -5   10.14    1.09 
   3  12   5   10.58    1.06 
   4  12  -5    8.13    0.94 
  -4  12   5    8.39    1.26 
  -4 -12  -5    9.94    1.15 
   4 -12  -5    9.02    0.76 
  -5  12   5    0.66    0.80 
   5  12  -5    0.22    0.59 
  -5 -12  -5    1.20    0.70 
   5 -12  -5    0.65    0.43 
   5  12   5    0.49    0.66 
  -5  12  -5    0.69    0.67 
   6  12  -5    0.80    0.47 
  -6  12   5   -0.16    0.73 
   6  12   5   -0.13    0.54 
   7  12  -5    1.20    0.55 
  -7 -12  -5    2.44    0.90 
  -7  12   5    0.03    0.77 
  -7  12  -5   -0.42    0.84 
   7 -12  -5    1.06    0.66 
   7  12   5   -0.15    0.58 
  -8 -12  -5    6.47    1.16 
   8  12  -5    3.95    1.00 
   8 -12  -5    5.95    0.83 
  -8  12  -5    5.06    1.00 
   0  13  -5    0.34    0.77 
   0 -13  -5    0.48    0.39 
   0  13   5   -0.38    0.50 
   0  13   5   -0.46    0.39 
   0  13  -5   -0.01    0.37 
   1  13  -5    0.90    0.57 
  -1  13   5    0.65    0.41 
  -1  13   5    0.41    0.53 
   1  13  -5    0.33    0.36 
   1  13   5    1.65    0.72 
   1  13   5    0.33    0.44 
  -1  13  -5    1.03    0.54 
   1 -13  -5    0.88    0.33 
  -1  13  -5    0.90    0.35 
  -2  13   5    0.58    0.40 
   2  13  -5    0.40    0.38 
  -2  13   5   -0.03    0.60 
  -2 -13  -5    0.58    0.65 
   2  13   5   -0.37    0.52 
   2 -13  -5    0.55    0.36 
  -2  13  -5    0.03    0.49 
  -2  13  -5   -0.26    0.28 
   3  13  -5    0.70    0.42 
  -3  13   5    0.38    0.77 
  -3 -13  -5    0.76    0.70 
  -3  13   5    0.41    0.38 
   3  13   5    0.17    0.48 
   3 -13  -5    0.42    0.44 
  -3  13  -5    0.97    0.59 
  -4  13   5    0.61    0.75 
   4  13  -5    0.41    0.45 
   4 -13  -5    1.37    0.43 
  -5  13   5    1.78    0.85 
   5  13  -5    1.11    0.64 
  -5 -13  -5    3.93    0.95 
  -5  13  -5    1.71    0.87 
   5 -13  -5    2.60    0.59 
  -6  13   5   -0.69    0.84 
   6  13  -5    0.67    0.67 
  -6 -13  -5    1.45    0.88 
  -6  13  -5    0.17    0.84 
   6  13   5   -0.52    0.60 
   6 -13  -5    0.82    0.52 
  -7 -13  -5    3.60    1.06 
  -7  13   5    0.05    1.30 
   7  13   5    1.81    0.85 
  -7  13  -5    2.54    1.08 
   7 -13  -5    1.45    0.67 
   0  14  -5    0.07    0.70 
   0  14   5   -0.13    0.44 
   0  14  -5    0.26    0.41 
  -1  14   5    7.63    0.97 
  -1  14   5    9.38    1.67 
   1  14  -5    9.07    0.87 
  -1  14  -5    8.17    1.40 
   1  14   5    7.28    1.02 
  -2  14   5   -0.12    0.42 
  -2  14   5   -0.07    0.69 
   2  14  -5   -0.05    0.40 
   2 -14  -5   -0.10    0.39 
   2  14   5   -0.25    0.47 
   2  14   5    0.21    0.72 
  -3  14   5    2.21    0.51 
  -3 -14  -5    3.12    0.89 
   3  14  -5    2.01    0.52 
  -3  14   5    1.31    0.81 
   3 -14  -5    2.29    0.49 
   3  14   5    2.19    0.68 
  -4  14   5   -0.94    0.78 
  -4 -14  -5    1.51    1.43 
   4  14  -5    0.55    0.58 
   4  14   5    1.04    0.62 
  -4  14  -5   -0.95    0.83 
   4 -14  -5    0.54    0.45 
  -5 -14  -5    0.85    0.94 
  -5  14   5   -0.93    0.79 
   5  14  -5    0.70    0.56 
  -5  14  -5   -0.94    0.83 
   5  14   5    0.89    0.61 
   6  14  -5    1.32    0.61 
  -6  14   5   -0.76    1.44 
  -6 -14  -5    2.04    1.00 
  -6  14  -5   -1.06    0.92 
   6 -14  -5   -0.26    0.62 
   0  15  -5    0.43    0.75 
   0  15   5    0.40    0.54 
   0  15   5    1.11    0.80 
   0  15  -5    0.30    0.44 
  -1  15   5    0.76    0.77 
  -1  15   5   -0.51    0.47 
   1  15  -5   -0.17    0.41 
   1  15  -5   -0.73    0.69 
   1  15   5   -1.01    0.77 
  -1  15  -5    1.80    0.72 
   1  15   5   -0.58    0.48 
  -2  15   5   -0.28    0.86 
  -2  15   5    1.52    0.56 
   2  15  -5    2.88    0.80 
   2  15  -5    1.19    0.48 
  -2  15  -5    1.22    0.73 
   2  15   5    0.84    0.61 
   2  15   5    0.76    0.82 
  -3  15   5    2.03    0.55 
   3  15  -5    1.45    0.56 
  -3  15   5    2.36    0.99 
   3  15   5    1.36    0.64 
   3  15   5    2.06    0.89 
  -4  15   5    2.78    1.15 
   4  15  -5    4.32    0.69 
   4 -15  -5    5.65    0.81 
  -4  15  -5    4.01    1.04 
   5  15  -5    0.59    0.59 
  -5  15   5   -2.25    1.88 
  -5  15  -5   -1.32    0.93 
   5  15   5    0.04    0.68 
   0  16   5    3.21    1.04 
   0  16  -5    2.54    0.60 
   0  16   5    1.42    1.11 
  -1  16   5    0.54    0.61 
  -1  16   5   -0.05    0.91 
   1  16  -5   -0.03    0.54 
   1  16  -5   -0.88    0.82 
   1  16   5   -1.06    0.54 
   1  16   5   -0.83    0.92 
  -1  16  -5    0.30    0.79 
   2  16  -5    1.65    0.92 
   2  16  -5    1.19    0.56 
  -2  16   5    1.06    0.71 
  -2  16   5   -0.12    1.00 
  -2  16  -5    0.56    0.88 
   2  16   5   -0.11    0.64 
   2  16   5    2.35    1.00 
   3  16  -5    1.30    0.61 
   3  16   5    0.86    1.07 
   3  16   5    0.16    0.67 
  -3  16  -5    1.16    1.50 
   4  16  -5    1.03    0.65 
  -4  16   5   -0.60    1.11 
   4  16   5    1.66    0.87 
   4  16   5    3.15    1.27 
   0  17   5    0.30    1.06 
   0  17   5   -0.40    0.64 
   0  17  -5   -0.45    1.13 
   1  17  -5   -1.05    0.67 
  -1  17   5   -1.25    0.74 
   1  17   5   -0.67    0.64 
   0   0  -6   16.51    0.71 
   0   0   6   16.73    0.72 
   0   0  -6   17.89    0.87 
   1   0  -6   16.93    0.65 
  -1   0  -6   15.71    0.75 
   1   0   6   17.92    0.87 
   1   0  -6   16.05    0.67 
  -1   0  -6   16.49    0.74 
  -1   0   6   15.84    0.62 
   1   0   6   16.48    0.73 
  -1   0   6   16.89    0.66 
   1   0  -6   16.08    0.65 
  -2   0  -6    0.09    0.28 
   2   0   6    0.05    0.13 
   2   0   6    0.02    0.17 
  -2   0   6    0.24    0.19 
  -2   0   6   -0.12    0.19 
   2   0  -6    0.14    0.18 
   2   0  -6    0.05    0.39 
   2   0  -6    0.02    0.15 
  -2   0  -6   -0.23    0.20 
  -3   0   6   78.28    2.59 
   3   0  -6   79.79    2.57 
  -3   0  -6   79.99    2.47 
  -3   0  -6   78.25    2.66 
  -3   0   6   79.45    2.41 
   3   0   6   83.51    2.50 
   3   0   6   81.18    2.59 
  -4   0  -6    8.48    0.55 
   4   0   6    8.89    0.58 
   4   0  -6    8.88    0.57 
   4   0   6    8.83    0.65 
  -4   0   6    8.50    0.65 
  -4   0  -6    8.73    0.70 
  -5   0   6   29.32    1.32 
   5   0   6   30.19    1.21 
  -5   0  -6   29.18    1.19 
  -5   0  -6   30.50    1.38 
   5   0  -6   29.92    1.20 
  -6   0  -6   18.80    1.15 
  -6   0  -6   19.57    1.02 
  -6   0   6   19.20    1.13 
   6   0  -6   19.99    1.02 
   7   0   6    0.62    0.34 
  -7   0  -6    0.49    0.56 
  -7   0   6   -0.02    0.43 
  -7   0   6    1.11    0.33 
   7   0  -6    1.05    0.34 
  -7   0  -6    0.56    0.48 
   8   0   6   11.02    1.47 
  -8   0  -6   11.28    1.00 
  -8   0  -6   11.70    0.98 
   8   0  -6   12.27    0.90 
  -8   0   6   11.80    1.08 
  -9   0   6    6.22    0.59 
   9   0  -6    5.69    0.94 
   9   0   6    6.70    0.85 
  -9   0   6    6.50    1.01 
  10   0  -6   11.83    1.13 
 -10   0  -6   11.25    1.30 
  10   0   6   12.39    1.08 
 -10   0   6   15.74    1.31 
 -11   0  -6    1.65    0.90 
 -11   0   6    1.08    0.74 
  11   0  -6    0.77    0.60 
  11   0  -6    0.96    0.54 
   0   1  -6   65.00    2.15 
   0  -1  -6   68.50    2.05 
   0   1  -6   69.37    2.04 
   0   1   6   70.21    2.20 
   0  -1  -6   67.37    2.18 
   0  -1   6   68.72    2.16 
   0   1  -6   67.19    2.20 
   0   1   6   64.71    2.22 
   0   1   6   68.65    2.05 
   1   1  -6  153.22    4.74 
   1  -1   6  173.06    4.91 
   1   1  -6  153.52    4.74 
  -1   1   6  160.57    4.74 
   1   1  -6  163.46    4.70 
  -1  -1  -6  154.03    4.80 
  -1   1   6  155.11    4.69 
   1  -1  -6  150.87    4.75 
  -1   1  -6  158.20    4.76 
  -1  -1   6  155.89    4.69 
   1   1   6  154.80    4.81 
  -1   1  -6  150.36    4.79 
   1  -1  -6  158.01    4.69 
   1  -1  -6  153.67    4.73 
   2  -1   6    1.68    0.22 
   2   1  -6    1.44    0.23 
   2  -1   6    2.05    0.32 
  -2   1   6    1.48    0.28 
   2   1  -6    1.97    0.31 
   2   1  -6    1.71    0.21 
  -2  -1  -6    2.17    0.38 
  -2   1   6    1.56    0.29 
  -2   1  -6    2.05    0.24 
   2   1   6    1.79    0.27 
   2  -1  -6    2.19    0.28 
  -2  -1   6    2.14    0.22 
   2  -1  -6    2.08    0.30 
  -2  -1   6    2.22    0.34 
  -2   1  -6    1.82    0.25 
   2  -1  -6    1.74    0.29 
  -2   1  -6    1.87    0.37 
   2   1   6    2.31    0.27 
   3  -1   6   36.39    1.22 
   3   1  -6   34.82    1.27 
  -3  -1  -6   34.68    1.38 
  -3   1   6   36.71    1.23 
   3  -1   6   35.69    1.27 
  -3   1   6   34.04    1.34 
  -3   1  -6   36.45    1.22 
  -3  -1   6   36.50    1.33 
  -3   1  -6   34.25    1.38 
   3  -1  -6   34.22    1.28 
   3   1   6   36.24    1.34 
   3   1   6   37.84    1.24 
  -3   1  -6   35.72    1.27 
  -4  -1  -6   70.29    2.46 
  -4   1   6   70.63    2.43 
   4   1  -6   69.36    2.33 
   4  -1   6   71.41    2.31 
  -4   1  -6   73.13    2.30 
  -4  -1   6   68.71    2.40 
  -4   1  -6   69.03    2.46 
   4  -1  -6   70.59    2.35 
   4   1   6   76.31    2.34 
   4   1   6   69.49    2.38 
   5  -1   6   29.27    1.15 
  -5   1   6   27.97    1.32 
  -5   1   6   29.18    1.03 
   5   1  -6   28.71    1.17 
  -5  -1  -6   28.82    1.35 
  -5  -1   6   28.70    1.30 
  -5   1  -6   29.58    1.19 
   5  -1  -6   29.13    1.20 
  -5   1  -6   29.19    1.35 
  -6  -1  -6   37.77    1.65 
  -6   1   6   38.00    1.29 
   6  -1   6   37.82    1.43 
   6   1  -6   37.45    1.45 
  -6   1   6   37.26    1.64 
  -6  -1   6   33.95    1.60 
   6   1   6   36.41    1.50 
  -6   1  -6   37.01    1.50 
  -6   1  -6   35.66    1.61 
   6  -1  -6   34.92    1.46 
  -7  -1  -6    3.98    0.71 
   7   1  -6    3.30    0.46 
  -7   1   6    3.42    0.46 
  -7   1   6    2.99    0.54 
  -7   1   6    2.72    0.61 
  -7   1  -6    2.34    0.67 
  -7   1  -6    2.73    0.71 
   7  -1  -6    2.75    0.45 
   7   1   6    2.42    0.49 
  -7  -1   6    2.23    0.55 
  -8   1   6    6.57    0.96 
  -8  -1  -6    5.27    0.85 
  -8   1   6    5.39    0.57 
   8  -1   6    5.29    0.75 
   8   1  -6    6.14    0.66 
   8  -1  -6    5.67    0.71 
   8   1   6    7.42    0.85 
  -8  -1   6    7.04    0.91 
  -8   1  -6    6.89    0.88 
  -8   1  -6    6.34    0.82 
  -9   1   6    2.13    0.60 
  -9   1   6    2.28    0.52 
   9  -1   6    1.93    0.51 
   9   1  -6    2.34    0.49 
   9   1   6    2.58    0.52 
  -9   1  -6    2.12    0.54 
   9  -1  -6    1.40    0.49 
  -9  -1   6    2.04    0.61 
 -10  -1  -6    8.58    1.18 
  10  -1   6    7.09    1.32 
 -10   1   6   10.59    1.31 
  10   1  -6   10.97    1.08 
  10  -1  -6    8.65    0.96 
 -10   1  -6    9.37    1.28 
 -10  -1   6   10.59    1.31 
  10   1   6    8.77    1.02 
  10  -1  -6   12.13    0.97 
  11   1  -6    4.43    0.71 
  11  -1   6    2.42    0.58 
 -11   1   6    4.15    0.89 
  11   1  -6    2.42    0.60 
 -11  -1  -6    3.02    0.97 
 -11   1  -6    1.87    1.01 
  11  -1  -6    4.00    0.88 
  11   1   6    2.55    0.70 
  11  -1  -6    4.78    0.76 
   0   2   6   17.83    0.85 
   0   2   6   14.78    0.73 
   0   2  -6   15.53    0.67 
   0   2   6   16.09    0.61 
   0  -2  -6   15.14    0.71 
   1   2  -6  436.29   12.65 
  -1   2   6  419.53   12.62 
  -1   2   6  423.73   12.89 
  -1  -2  -6  437.59   12.74 
   1   2  -6  442.68   12.61 
   1   2  -6  416.52   12.60 
   1   2   6  428.10   12.57 
   1   2   6  410.74   12.73 
   1  -2  -6  429.65   12.68 
  -1   2  -6  444.45   12.66 
   1  -2  -6  428.01   12.66 
  -1   2  -6  419.29   12.55 
  -1   2  -6  422.59   12.71 
   1  -2  -6  439.51   12.62 
   2   2  -6   98.53    3.03 
   2   2  -6   93.19    2.89 
   2   2  -6   96.74    3.01 
  -2  -2  -6   95.23    3.12 
  -2   2   6  100.31    3.01 
  -2   2   6   95.88    3.05 
   2  -2   6   95.46    3.02 
   2   2   6   96.94    3.11 
  -2   2  -6  100.45    3.00 
   2  -2  -6   96.54    3.03 
   2  -2  -6   96.53    3.01 
   2  -2  -6   98.31    3.04 
  -2   2  -6   94.71    2.93 
  -2   2  -6   93.88    3.10 
   3  -2   6  121.48    3.71 
  -3  -2  -6  116.26    3.86 
  -3   2   6  117.30    3.82 
   3  -2   6  125.71    3.69 
  -3   2   6  123.58    3.71 
   3   2  -6  120.27    3.74 
   3   2   6  118.88    3.83 
   3   2   6  125.69    3.71 
  -3   2  -6  123.52    3.71 
   3  -2  -6  121.73    3.78 
  -3   2  -6  118.82    3.70 
  -3   2  -6  118.06    3.86 
   4   2  -6    2.40    0.38 
   4  -2   6    2.50    0.38 
  -4   2   6    2.63    0.40 
  -4   2   6    2.45    0.42 
  -4  -2  -6    2.68    0.50 
   4  -2   6    1.80    0.41 
  -4   2  -6    2.38    0.48 
   4  -2  -6    2.40    0.35 
  -4   2  -6    2.55    0.47 
   4   2   6    2.55    0.48 
  -4  -2   6    1.83    0.37 
  -4   2  -6    2.06    0.38 
  -5   2   6    1.72    0.49 
  -5  -2  -6    1.77    0.55 
  -5   2   6    2.84    0.45 
   5   2  -6    2.01    0.34 
   5  -2   6    2.33    0.42 
  -5   2  -6    2.65    0.40 
   5   2   6    1.90    0.38 
  -5  -2   6    1.49    0.41 
  -5   2  -6    1.47    0.38 
  -6   2   6   30.10    1.22 
  -6   2   6   27.28    1.44 
  -6  -2  -6   27.39    1.38 
   6  -2   6   27.92    1.13 
   6   2   6   27.73    1.35 
  -6   2  -6   27.41    1.29 
  -6  -2   6   25.97    1.36 
  -6   2  -6   26.68    1.37 
   6  -2  -6   27.57    1.22 
   7  -2   6   32.86    1.32 
   7   2  -6   32.24    1.36 
  -7  -2  -6   35.00    1.58 
  -7   2   6   31.75    1.58 
  -7  -2   6   32.44    1.56 
  -7   2  -6   31.73    1.57 
   7  -2  -6   31.67    1.41 
   7   2   6   33.55    1.52 
   8   2  -6   14.17    1.13 
  -8   2   6   14.38    0.81 
   8   2  -6   17.62    0.96 
  -8  -2  -6   14.14    1.08 
  -8   2  -6   14.10    1.08 
  -8   2  -6   13.76    1.04 
   8   2   6   14.76    1.04 
   8  -2  -6   14.62    0.95 
  -9   2   6    3.49    0.58 
   9   2  -6    2.30    0.50 
   9   2  -6    3.36    0.80 
  -9   2   6    2.87    0.68 
  -9   2  -6    2.75    0.60 
   9   2   6    2.39    0.59 
  -9   2  -6    2.61    0.88 
   9  -2  -6    1.68    0.50 
  -9  -2   6    2.65    0.67 
 -10   2   6    1.91    0.64 
  10   2  -6    0.64    0.56 
 -10  -2  -6    0.71    0.76 
  10   2  -6    0.30    0.53 
 -10   2  -6    1.05    0.55 
  10  -2  -6    0.01    0.50 
  10  -2  -6   -0.13    0.36 
  11   2  -6    5.41    0.79 
 -11   2   6    4.86    0.93 
 -11  -2  -6    6.31    1.11 
  11  -2  -6    3.90    0.91 
  11   2   6    4.20    0.77 
  11  -2  -6    6.80    1.27 
 -11   2  -6    5.73    1.14 
   0   3  -6    1.86    0.30 
   0  -3  -6    1.14    0.21 
   0   3   6    1.28    0.21 
   0  -3  -6    1.24    0.31 
   0   3   6    1.03    0.25 
  -1  -3  -6   77.94    2.57 
   1   3  -6   74.47    2.41 
  -1   3   6   75.20    2.55 
  -1   3   6   78.33    2.47 
  -1   3  -6   80.51    2.45 
   1   3   6   78.97    2.42 
  -1   3  -6   75.55    2.52 
   1  -3  -6   78.25    2.51 
   1  -3  -6   79.91    2.46 
  -1   3  -6   78.17    2.40 
   1  -3  -6   78.00    2.46 
   1   3   6   76.57    2.57 
   2   3  -6   14.14    0.63 
  -2   3   6   16.55    0.84 
   2   3  -6   14.25    0.55 
   2   3  -6   15.51    0.80 
  -2  -3  -6   14.15    0.78 
  -2   3   6   14.57    0.76 
  -2   3  -6   13.81    0.76 
   2  -3  -6   14.24    0.70 
   2  -3  -6   13.91    0.68 
  -2   3  -6   15.68    0.63 
  -2   3  -6   14.37    0.63 
   2   3   6   13.89    0.77 
  -3   3   6   14.73    0.80 
   3   3  -6   13.81    0.64 
   3  -3   6   12.94    0.65 
  -3   3   6   13.51    0.80 
  -3  -3  -6   12.55    0.80 
   3   3   6   12.42    0.76 
  -3   3  -6   12.98    0.67 
   3   3   6   13.95    0.68 
  -3   3  -6   13.90    0.59 
   3  -3  -6   13.03    0.68 
  -3   3  -6   13.60    0.79 
   4   3  -6   10.54    0.59 
  -4   3   6   11.43    0.84 
   4  -3   6   11.74    0.54 
  -4  -3  -6   10.94    0.80 
  -4   3  -6   10.99    0.80 
  -4   3  -6   11.35    0.71 
   4  -3  -6   10.39    0.65 
  -4   3  -6   10.66    0.52 
   5  -3   6   25.76    0.95 
   5   3  -6   24.76    1.02 
  -5   3   6   24.42    1.27 
   5   3   6   25.00    1.21 
  -5   3  -6   24.22    1.13 
  -5   3  -6   23.62    0.90 
  -5   3  -6   23.53    1.28 
  -6   3   6   15.21    1.12 
  -6  -3  -6   15.62    1.05 
   6   3  -6   13.73    0.92 
   6  -3  -6   14.09    0.85 
  -6   3  -6   14.30    1.01 
  -6   3  -6   13.23    0.65 
   6   3   6   12.66    1.00 
  -6   3  -6   15.01    0.99 
   7  -3   6   51.48    1.82 
  -7  -3  -6   52.95    2.13 
   7   3  -6   54.99    2.36 
  -7   3   6   53.62    2.21 
   7   3   6   52.84    2.11 
  -7   3  -6   49.91    2.23 
  -7   3  -6   51.02    2.13 
  -8  -3  -6    2.55    0.66 
   8   3  -6    1.64    0.40 
   8  -3   6    1.64    0.37 
   8   3   6    1.40    0.42 
  -8   3  -6    1.81    0.53 
   9   3  -6    7.88    0.83 
   9   3  -6    6.76    0.76 
  -9   3   6    6.16    1.12 
  -9   3   6    6.86    0.76 
   9  -3   6    5.20    0.76 
  -9   3  -6    7.83    1.02 
   9  -3  -6    4.66    0.66 
  -9   3  -6    7.16    1.02 
   9   3   6    5.20    0.77 
  10   3  -6    2.29    0.55 
 -10   3   6    3.05    0.76 
  10  -3   6    3.69    0.58 
  10   3  -6    3.68    0.61 
 -10  -3  -6    5.17    0.95 
 -10   3   6    3.19    0.74 
 -10   3  -6    4.58    1.10 
  10   3   6    2.85    0.66 
  10  -3  -6    3.57    0.65 
  11   3  -6    1.28    0.56 
  11   3  -6    1.37    0.58 
 -11   3   6    1.57    0.75 
 -11  -3  -6    1.75    0.89 
  11  -3  -6    1.49    1.00 
 -11   3  -6    1.22    1.00 
 -11   3  -6    2.33    0.72 
  11   3   6    0.00    0.66 
  11  -3  -6    1.32    0.66 
   0  -4  -6    7.16    0.42 
   0  -4  -6    6.59    0.55 
   0   4   6    7.91    0.48 
   0   4   6    6.89    0.56 
  -1   4   6   55.12    1.95 
  -1   4   6   56.02    1.88 
  -1  -4  -6   55.30    1.96 
   1   4   6   57.20    1.84 
   1  -4  -6   60.75    1.97 
   1  -4  -6   54.08    1.91 
   1   4   6   53.59    1.96 
  -1   4  -6   54.72    1.81 
   1  -4  -6   56.29    1.85 
  -2  -4  -6  215.74    6.76 
  -2   4   6  219.15    6.69 
   2   4  -6  218.72    6.59 
  -2   4  -6  230.14    6.56 
   2  -4  -6  216.94    6.69 
  -2   4  -6  218.21    6.60 
   2  -4  -6  224.86    6.65 
   2   4   6  217.43    6.76 
  -3   4   6   35.33    1.40 
  -3  -4  -6   33.20    1.41 
   3   4  -6   34.49    1.22 
   3  -4  -6   33.75    1.29 
  -3   4  -6   34.10    1.28 
  -3   4  -6   34.59    1.14 
  -3   4  -6   34.67    1.44 
   3   4   6   35.12    1.42 
   4   4  -6   45.71    1.63 
  -4   4   6   48.26    1.86 
  -4  -4  -6   50.10    1.89 
   4  -4  -6   49.32    1.73 
  -4   4  -6   47.92    1.52 
  -4   4  -6   47.76    1.73 
  -4   4  -6   46.25    1.88 
   5  -4   6    1.48    0.30 
   5   4  -6    1.81    0.33 
  -5  -4  -6    1.60    0.56 
   5  -4  -6    1.54    0.35 
  -5   4  -6    1.81    0.55 
  -5   4  -6    0.98    0.42 
  -5   4  -6    1.76    0.25 
   6  -4   6    3.83    0.42 
  -6  -4  -6    4.70    0.74 
  -6   4   6    5.45    0.93 
   6   4  -6    4.50    0.58 
   6   4   6    3.98    0.73 
  -6   4  -6    5.01    0.76 
   6  -4  -6    4.29    0.56 
  -6   4  -6    4.90    0.83 
   7   4  -6    6.33    0.65 
   7  -4   6    6.79    0.56 
  -7  -4  -6    6.88    0.84 
   7   4  -6    5.50    0.78 
  -7   4   6    6.83    0.93 
   7   4   6    6.25    0.85 
  -7   4  -6    7.62    0.90 
  -7   4  -6    5.85    0.92 
  -8  -4  -6   11.16    0.99 
   8  -4   6    9.90    0.69 
   8   4  -6    9.36    0.77 
  -8   4  -6    9.33    0.98 
   8   4   6   10.44    1.01 
  -9   4   6    0.11    0.68 
   9  -4   6   -0.09    0.34 
   9   4  -6    0.37    0.37 
   9   4  -6    0.71    0.44 
  -9   4  -6    0.88    0.55 
  -9   4  -6   -0.32    0.65 
  10   4  -6    3.81    0.59 
  10   4  -6    5.27    0.95 
 -10  -4  -6    4.56    1.01 
 -10   4   6    4.73    0.76 
 -10   4   6    4.08    0.87 
  10  -4  -6    4.07    0.73 
 -10   4  -6    6.75    1.14 
 -10   4  -6    5.99    1.08 
  10   4   6    3.17    0.74 
  11   4  -6    2.37    0.72 
 -11  -4  -6    4.57    1.03 
  11   4  -6    2.85    0.64 
 -11   4   6    2.97    0.96 
  11  -4  -6    1.68    0.76 
 -11   4  -6    2.25    1.04 
  11   4   6    1.83    0.73 
  11  -4  -6    3.64    0.59 
   0   5   6   20.14    0.86 
   0  -5  -6   19.75    0.78 
   0  -5  -6   18.18    0.92 
   0   5   6   19.64    0.94 
  -1   5   6   38.39    1.40 
  -1  -5  -6   38.14    1.30 
  -1  -5  -6   36.84    1.48 
  -1   5   6   36.84    1.45 
   1  -5  -6   37.89    1.33 
   1   5   6   38.72    1.37 
  -1   5  -6   37.63    1.35 
   1   5   6   36.90    1.48 
   1  -5  -6   38.26    1.45 
  -2   5   6   56.56    1.98 
  -2  -5  -6   53.81    2.02 
   2   5  -6   54.45    1.81 
  -2   5  -6   56.30    1.89 
   2  -5  -6   55.03    1.88 
   2   5   6   55.51    2.03 
  -2   5  -6   59.51    1.78 
   2  -5  -6   55.57    1.98 
  -3   5   6   68.46    2.42 
  -3  -5  -6   68.32    2.46 
   3   5  -6   71.04    2.16 
   3   5  -6   68.70    2.22 
  -3   5  -6   69.00    2.32 
   3  -5  -6   70.79    2.31 
   3   5   6   67.78    2.45 
   4   5  -6   43.85    1.50 
  -4   5   6   42.98    1.78 
  -4   5  -6   42.30    1.64 
   4  -5  -6   44.43    1.62 
  -5   5   6    5.35    0.94 
   5   5  -6    5.08    0.49 
  -5  -5  -6    5.26    0.76 
  -5   5  -6    4.91    0.71 
  -5   5  -6    5.97    0.79 
   5   5   6    5.22    0.72 
   5  -5  -6    5.68    0.57 
  -6   5   6   14.67    1.21 
  -6  -5  -6   14.98    1.05 
   6   5  -6   15.08    0.87 
   6   5  -6   15.59    0.82 
   6   5   6   17.22    1.08 
  -6   5  -6   15.85    1.06 
   6  -5  -6   15.94    0.89 
  -7   5   6    3.56    0.67 
  -7  -5  -6    4.52    0.74 
   7   5  -6    3.41    0.48 
  -7   5  -6    3.78    0.70 
   7   5   6    4.70    0.81 
  -7   5  -6    3.05    0.59 
  -8   5   6    5.25    0.93 
  -8  -5  -6    6.25    1.01 
   8   5  -6    6.79    0.66 
  -8   5  -6    7.32    1.29 
  -8   5  -6    5.62    0.91 
   9   5  -6   -0.43    0.41 
  -9   5   6    0.69    0.72 
   9   5  -6    0.58    0.45 
  -9  -5  -6    0.92    0.75 
  -9   5  -6    0.12    0.53 
  -9   5  -6    1.63    0.88 
   9   5   6    0.20    0.53 
   9  -5  -6    0.48    0.48 
  10   5  -6    9.66    0.91 
  10   5  -6    8.14    1.11 
 -10   5   6    9.49    0.97 
 -10   5   6    9.26    1.43 
  10   5   6    8.17    1.32 
 -10   5  -6   11.09    1.47 
  10  -5  -6    8.97    1.01 
 -10   5  -6    9.30    1.84 
  11   5  -6    1.30    0.63 
 -11  -5  -6    3.13    1.10 
  11   5  -6    2.70    0.73 
  11  -5  -6    1.54    0.51 
 -11   5  -6    0.98    1.09 
 -11   5  -6    3.56    0.82 
  11   5   6    1.39    0.74 
   0  -6  -6    1.88    0.43 
   0  -6  -6    1.62    0.25 
   0   6   6    1.04    0.31 
   0   6   6    1.34    0.34 
  -1   6   6   61.13    2.12 
  -1  -6  -6   60.73    2.20 
  -1  -6  -6   61.36    1.97 
  -1   6   6   60.33    2.16 
  -1   6  -6   63.64    2.32 
   1   6   6   62.31    2.10 
   1  -6  -6   60.91    2.01 
   1  -6  -6   59.89    2.18 
   1   6   6   59.19    2.21 
  -2  -6  -6    5.57    0.66 
   2   6  -6    6.11    0.40 
  -2   6   6    6.71    0.66 
  -2   6   6    6.22    0.61 
   2   6  -6    6.90    0.51 
   2  -6  -6    5.61    0.62 
  -2   6  -6    5.73    0.57 
   2  -6  -6    5.70    0.49 
  -2   6  -6    5.92    0.39 
   2   6   6    6.77    0.73 
   3   6  -6   23.37    0.88 
  -3  -6  -6   20.26    1.50 
  -3   6   6   23.32    1.17 
   3   6  -6   22.26    0.87 
  -3   6  -6   22.35    1.05 
   3  -6  -6   22.56    0.98 
   4   6  -6   15.54    0.65 
   4   6  -6   13.85    0.68 
  -4  -6  -6   13.65    0.96 
   4   6  -6   14.86    0.82 
  -4   6  -6   14.40    0.94 
  -5  -6  -6    4.87    0.72 
  -5   6   6    3.81    0.65 
   5   6  -6    3.28    0.51 
   5   6  -6    4.42    0.47 
   5  -6  -6    3.52    0.54 
   5   6   6    4.39    0.73 
  -5   6  -6    5.88    0.87 
  -6   6   6    1.70    0.60 
   6   6  -6    1.97    0.38 
  -6  -6  -6    2.28    0.60 
   6   6  -6    1.50    0.34 
   6   6   6    1.41    0.43 
  -6   6  -6    1.31    0.57 
   6  -6  -6    1.47    0.38 
  -7  -6  -6    2.66    0.66 
   7   6  -6    2.58    0.43 
  -7   6  -6    2.60    0.59 
   7   6   6    1.85    0.55 
   8   6  -6    5.34    0.63 
  -8   6   6    3.86    0.78 
   8  -6  -6    4.84    0.67 
  -8   6  -6    4.65    0.84 
   8   6   6    4.25    0.82 
  -8   6  -6    5.28    0.93 
   9   6  -6    0.34    0.41 
  -9  -6  -6    1.12    0.73 
  -9   6   6    0.80    0.69 
   9   6  -6    1.05    0.46 
  -9   6  -6    0.32    0.73 
  -9   6  -6    0.95    0.59 
   9  -6  -6    0.95    0.54 
  10   6  -6    2.29    0.54 
 -10   6   6    3.85    0.94 
  10   6  -6    2.44    0.55 
 -10  -6  -6    4.17    0.97 
 -10   6  -6    2.84    1.03 
 -10   6  -6    2.49    0.84 
  10  -6  -6    2.45    0.67 
  10   6   6    2.91    1.01 
  11   6  -6    0.34    0.67 
 -11   6   6    0.97    0.90 
  11   6  -6    1.38    0.62 
 -11  -6  -6    2.35    1.04 
 -11   6  -6   -0.83    1.21 
  11  -6  -6    1.19    0.71 
 -11   6  -6    2.82    0.83 
  11   6   6    1.26    0.74 
  11  -6  -6    1.25    0.51 
   0   7   6    6.84    0.67 
   0   7  -6    7.00    0.42 
   0   7   6    6.33    0.64 
   0  -7  -6    6.94    0.45 
   0  -7  -6    6.18    0.67 
  -1   7   6    3.62    0.59 
  -1  -7  -6    2.11    0.60 
  -1  -7  -6    2.67    0.34 
  -1   7   6    2.24    0.38 
   1  -7  -6    2.50    0.38 
   1   7   6    2.54    0.41 
   1   7   6    1.57    0.37 
   1  -7  -6    3.45    0.58 
  -1   7  -6    1.91    0.26 
  -1   7  -6    2.12    0.36 
  -2  -7  -6   12.74    0.60 
  -2   7   6   13.57    0.91 
  -2   7   6   13.09    0.84 
   2   7  -6   12.96    0.58 
  -2  -7  -6   11.69    1.17 
   2   7  -6   14.71    0.71 
  -2   7  -6   12.49    0.80 
  -2   7  -6   13.49    0.53 
   2  -7  -6   13.01    0.70 
   3   7  -6    7.78    0.46 
   3   7  -6    7.08    0.71 
  -3  -7  -6    7.95    0.79 
  -3   7  -6    7.64    0.74 
   3  -7  -6    7.95    0.61 
   3   7   6    8.47    0.83 
  -4  -7  -6    3.73    0.70 
   4   7  -6    3.94    0.41 
  -4   7   6    5.90    0.91 
   4   7  -6    4.45    0.51 
   4   7  -6    3.33    0.51 
   4  -7  -6    3.67    0.47 
  -4   7  -6    5.36    0.81 
   5   7  -6   18.87    0.83 
   5   7  -6   20.46    1.03 
  -5   7   6   19.78    1.30 
   5   7  -6   19.39    0.86 
  -5  -7  -6   18.17    1.15 
   5  -7  -6   20.15    1.00 
   5   7   6   18.36    1.17 
  -5   7  -6   19.65    1.35 
  -6   7   6    3.47    0.68 
   6   7  -6    3.08    0.57 
   6   7  -6    2.18    0.38 
  -6  -7  -6    3.93    0.69 
  -6   7  -6    3.00    0.59 
   6  -7  -6    2.42    0.45 
   6   7   6    2.41    0.52 
  -7  -7  -6   10.79    1.07 
  -7   7  -6    9.70    1.06 
   8   7  -6    1.96    0.41 
  -8   7   6    2.44    0.80 
  -8   7  -6    3.11    0.87 
   8   7   6    1.98    0.58 
   8  -7  -6    2.08    0.54 
  -8   7  -6    2.04    0.64 
  -9  -7  -6   10.09    1.20 
   9   7  -6    8.78    1.02 
   9   7  -6    7.57    0.79 
  -9   7   6    9.45    1.45 
   9  -7  -6    9.49    1.01 
  -9   7  -6    6.86    1.24 
  -9   7  -6    9.79    1.25 
   9   7   6    9.02    1.27 
 -10   7   6    1.62    0.88 
  10   7  -6    0.89    0.57 
 -10  -7  -6    3.34    1.05 
  10   7  -6    0.92    0.51 
  10   7   6    1.55    0.75 
  10  -7  -6    0.29    0.64 
 -10   7  -6    2.07    0.82 
 -10   7  -6    0.79    0.99 
   0   8   6   24.94    1.45 
   0   8   6   29.59    1.32 
   0  -8  -6   27.85    1.36 
   0  -8  -6   27.73    1.05 
   0   8  -6   28.82    1.07 
  -1   8   6    6.02    0.74 
   1   8  -6    5.88    0.49 
  -1  -8  -6    5.84    0.44 
  -1   8   6    6.77    0.77 
  -1  -8  -6    4.90    0.69 
   1  -8  -6    5.94    0.48 
  -1   8  -6    5.87    0.40 
   1   8   6    6.47    0.74 
   1   8   6    6.57    0.71 
   1  -8  -6    5.91    0.75 
  -1   8  -6    5.79    0.64 
   2   8  -6   10.13    0.51 
   2   8  -6   11.43    0.68 
  -2  -8  -6   10.43    0.55 
  -2   8   6    9.97    0.84 
  -2  -8  -6    9.11    0.82 
  -2   8  -6   11.10    0.51 
   2   8   6   10.92    0.91 
  -2   8  -6   10.26    0.82 
   2  -8  -6   10.79    0.65 
   3   8  -6    2.25    0.27 
  -3   8   6    2.34    0.54 
  -3  -8  -6    3.28    0.64 
   3   8  -6    1.94    0.35 
   3   8   6    2.57    0.49 
   3  -8  -6    3.45    0.52 
  -3   8  -6    2.68    0.52 
   4   8  -6   18.82    0.80 
  -4  -8  -6   18.89    1.15 
  -4   8   6   20.64    1.28 
   4   8  -6   21.85    1.03 
  -4   8  -6   18.83    1.31 
   4  -8  -6   19.05    1.00 
  -5  -8  -6    3.70    0.69 
   5   8  -6    2.66    0.34 
   5   8  -6    2.34    0.39 
  -5   8   6    2.82    0.66 
   5   8  -6    4.05    0.63 
  -5   8  -6    3.44    0.61 
   5  -8  -6    2.80    0.44 
  -6  -8  -6    0.98    0.57 
   6   8  -6    0.99    0.32 
   6   8  -6    0.92    0.34 
   6  -8  -6    0.82    0.40 
  -6   8  -6    1.10    0.52 
  -7   8   6    1.90    0.69 
   7   8  -6    2.10    0.45 
   7   8  -6    1.49    0.40 
   7   8   6    1.87    0.54 
  -7   8  -6    1.94    0.62 
  -8   8   6    0.56    0.71 
   8   8  -6    0.20    0.42 
  -8  -8  -6    1.60    0.71 
   8   8  -6    0.33    0.41 
  -8   8  -6    1.78    0.63 
   8   8   6    0.88    0.62 
  -8   8  -6    1.66    0.80 
  -9   8   6    0.98    0.78 
   9   8  -6   -0.24    0.42 
   9   8  -6    0.31    0.44 
  -9  -8  -6    1.19    1.03 
  -9   8  -6    0.86    0.84 
   9  -8  -6   -0.29    0.58 
   9   8   6    0.05    0.62 
 -10  -8  -6    1.78    0.97 
  10   8  -6   -0.55    0.49 
  10   8   6    0.04    0.72 
 -10   8  -6   -0.46    1.02 
  10  -8  -6   -1.13    0.73 
 -10   8  -6    0.89    0.76 
   0   9   6   37.68    1.63 
   0   9  -6   36.92    1.38 
   0   9   6   38.57    1.65 
   0  -9  -6   36.02    1.32 
   0  -9  -6   36.47    1.67 
  -1  -9  -6    7.10    0.49 
  -1   9   6    5.77    0.90 
  -1   9   6    7.11    0.84 
   1   9  -6    6.49    0.54 
  -1  -9  -6    6.31    0.73 
   1   9  -6    7.72    0.45 
   1   9   6    6.69    0.80 
   1  -9  -6    5.86    0.52 
   1   9   6    8.03    0.81 
  -1   9  -6    6.82    0.49 
   1  -9  -6    5.77    0.80 
   2   9  -6    3.61    0.37 
  -2   9   6    3.44    0.61 
  -2  -9  -6    3.85    0.39 
   2   9  -6    3.33    0.63 
  -2  -9  -6    4.23    0.67 
  -2   9  -6    3.85    0.38 
   2  -9  -6    3.38    0.50 
   2   9   6    3.89    0.55 
  -3  -9  -6    0.25    0.47 
  -3   9   6   -0.13    0.45 
   3   9  -6    0.28    0.26 
  -3  -9  -6    0.45    0.25 
   3   9  -6   -0.17    0.20 
   3   9   6    0.05    0.36 
  -3   9  -6    0.74    0.45 
  -4   9   6   33.72    1.67 
   4   9  -6   36.06    1.48 
   4   9  -6   31.68    1.18 
  -4  -9  -6   34.13    1.89 
  -4   9  -6   33.33    1.56 
   4  -9  -6   33.57    1.38 
   5   9  -6    0.21    0.32 
   5   9  -6    0.06    0.27 
  -5   9   6    0.45    0.52 
  -5  -9  -6    0.69    0.56 
   5  -9  -6   -0.39    0.32 
  -5   9  -6    0.90    0.49 
   6   9  -6   27.91    1.62 
   6   9  -6   26.30    1.06 
  -6   9   6   24.59    1.84 
  -6   9  -6   27.62    1.58 
  -7   9   6    1.17    0.83 
  -7  -9  -6    0.72    0.64 
   7   9  -6    0.69    0.35 
  -7   9  -6    0.35    0.58 
   7  -9  -6    1.20    0.46 
   8   9  -6    9.11    0.80 
  -8  -9  -6    9.36    1.42 
  -8   9   6    7.96    1.38 
   8   9  -6    9.82    0.99 
   8   9   6    6.15    0.92 
  -8   9  -6    8.96    1.29 
  -8   9  -6    8.00    1.28 
   8  -9  -6   10.25    1.04 
  -9   9   6    0.79    0.85 
   9   9  -6    2.05    0.46 
   9   9  -6    1.99    0.54 
  -9  -9  -6    2.04    0.92 
  -9   9  -6    0.70    0.75 
  -9   9  -6    0.35    0.95 
   9   9   6   -0.22    0.68 
   9  -9  -6    2.36    0.69 
  10   9  -6    3.12    0.65 
 -10  -9  -6    4.74    1.25 
 -10   9   6    4.45    1.10 
  10   9   6    2.55    0.98 
 -10   9  -6    3.04    0.88 
 -10   9  -6    5.05    1.31 
  10  -9  -6    2.76    0.88 
   0 -10  -6   -0.18    0.27 
   0  10   6   -0.16    0.35 
   0  10  -6    0.20    0.40 
   0  10  -6   -0.08    0.27 
   0 -10  -6   -0.10    0.49 
   0  10   6    0.11    0.41 
  -1  10   6   16.07    1.13 
   1  10  -6   13.85    0.70 
  -1  10   6   16.68    1.53 
  -1 -10  -6   15.50    0.71 
   1  10  -6   16.02    0.90 
   1  10  -6   15.11    0.67 
  -1  10  -6   16.26    1.08 
   1 -10  -6   15.84    0.79 
   1  10   6   15.04    1.06 
  -1  10  -6   15.49    0.80 
   1  10   6   15.35    1.08 
   2  10  -6    9.95    0.73 
  -2  10   6    8.82    0.95 
   2  10  -6    7.55    0.47 
  -2  10   6    8.44    0.89 
  -2 -10  -6    9.57    0.53 
  -2 -10  -6   10.19    0.91 
   2  10   6    7.92    0.84 
   2  10   6    8.64    0.91 
   2 -10  -6    9.00    0.68 
  -2  10  -6    8.70    0.53 
  -3 -10  -6    3.65    0.42 
   3  10  -6    3.44    0.53 
  -3  10   6    4.12    0.69 
  -3 -10  -6    4.74    0.73 
   3  10  -6    4.20    0.37 
   3 -10  -6    4.31    0.61 
   3  10   6    3.03    0.53 
  -3  10  -6    4.77    0.82 
  -4 -10  -6   24.01    0.93 
   4  10  -6   21.69    0.84 
  -4 -10  -6   23.06    1.51 
  -4  10   6   20.06    1.46 
   4  10  -6   24.24    1.25 
  -4  10  -6   22.71    1.32 
   4 -10  -6   21.81    1.08 
   4  10   6   23.26    1.39 
   5  10  -6    6.26    0.48 
   5  10  -6    6.24    0.74 
   5 -10  -6    7.61    0.72 
  -5  10  -6    5.80    1.02 
   6  10  -6    4.15    0.53 
  -6  10   6    3.63    0.80 
  -6 -10  -6    5.61    0.89 
   6  10  -6    5.85    0.77 
  -6  10  -6    5.16    0.81 
   7  10  -6    0.39    0.37 
  -7  10   6    0.35    0.71 
   7  10  -6    0.44    0.42 
  -7 -10  -6    1.86    0.78 
   7 -10  -6    1.17    0.53 
  -7  10  -6   -0.12    0.64 
  -8 -10  -6    2.49    1.12 
  -8  10   6    1.21    0.83 
   8  10  -6    1.60    0.53 
   8  10   6    2.02    0.69 
  -8  10  -6    0.82    0.83 
   8 -10  -6    2.97    0.70 
  -8  10  -6    2.47    0.91 
  -9 -10  -6    1.11    0.95 
   9  10  -6    1.11    1.04 
  -9  10  -6    1.10    0.80 
   9 -10  -6    1.38    0.68 
  -9  10  -6    1.05    1.30 
   9  10   6   -0.81    0.75 
   0  11  -6    6.37    0.81 
   0 -11  -6    6.21    0.53 
   0  11   6    6.38    0.89 
   0  11  -6    6.56    0.69 
  -1 -11  -6   24.97    0.98 
  -1  11   6   28.03    1.37 
   1  11  -6   26.44    1.42 
   1  11  -6   25.29    0.93 
  -1  11   6   27.22    1.45 
  -1  11  -6   25.79    1.42 
   1 -11  -6   25.02    1.08 
  -1  11  -6   24.08    1.09 
   1  11   6   26.00    1.41 
   1  11   6   26.39    1.38 
   2  11  -6    6.16    0.67 
  -2 -11  -6    5.53    0.46 
  -2  11   6    5.53    0.91 
  -2  11   6    6.05    0.79 
   2  11   6    5.16    0.85 
  -2  11  -6    4.49    0.48 
   2 -11  -6    4.07    0.61 
   2  11   6    5.01    0.85 
  -3 -11  -6   13.34    0.65 
  -3  11   6   13.62    1.00 
   3  11  -6   13.07    0.90 
  -3  11  -6   11.95    1.59 
   3 -11  -6   13.52    0.86 
   3  11   6   12.07    1.07 
   4  11  -6    7.49    0.82 
  -4 -11  -6    8.75    0.54 
   4  11   6   10.50    1.44 
  -4  11  -6    8.88    1.08 
   4 -11  -6    9.48    0.76 
   5  11  -6    4.74    0.77 
  -5 -11  -6    5.50    0.57 
  -5 -11  -6    6.20    0.94 
  -5  11   6    4.32    0.86 
   5 -11  -6    5.54    0.74 
  -5  11  -6    4.95    0.83 
  -6  11   6   -0.22    0.67 
  -6 -11  -6    1.29    0.75 
   6  11   6   -0.26    0.51 
  -6  11  -6   -0.21    0.68 
   6 -11  -6    0.04    0.45 
  -7 -11  -6    4.64    0.99 
  -7  11   6    3.21    0.88 
   7  11  -6    2.33    0.54 
   7  11   6    3.37    0.73 
  -8  11   6    0.21    0.88 
   8  11  -6   -0.18    0.54 
  -8 -11  -6    0.25    0.92 
  -8  11  -6    0.11    0.78 
   8 -11  -6    0.37    0.64 
   8  11   6   -0.21    0.63 
  -9 -11  -6    4.95    1.19 
   9 -11  -6    4.40    1.08 
   9  11   6    3.41    0.90 
   0  12   6    2.20    0.48 
   0  12  -6    2.72    0.42 
   0  12  -6    3.64    0.64 
   0 -12  -6    3.50    0.50 
  -1 -12  -6    0.99    0.29 
  -1  12   6    0.33    0.39 
   1  12  -6    0.56    0.38 
  -1  12  -6   -0.06    0.72 
  -1  12  -6   -0.14    0.30 
   1 -12  -6    0.49    0.33 
   1  12   6   -0.05    0.52 
  -2  12   6    4.97    0.81 
  -2 -12  -6    4.72    0.84 
   2  12  -6    3.75    0.71 
  -2 -12  -6    4.23    0.43 
  -2  12  -6    3.95    0.84 
   2  12   6    3.79    0.61 
   2 -12  -6    5.27    0.67 
  -3  12   6    2.61    0.49 
   3  12  -6    2.29    0.46 
  -3 -12  -6    3.78    0.77 
  -3  12   6    2.14    0.72 
  -3  12  -6    2.65    0.63 
   3  12   6    2.47    0.64 
   3 -12  -6    2.58    0.47 
  -4  12   6    3.37    0.83 
  -4 -12  -6    3.67    0.81 
  -4  12  -6    2.51    0.70 
   4 -12  -6    3.77    0.53 
   4  12   6    2.45    0.62 
  -5  12   6    2.65    0.85 
   5  12  -6    2.60    0.60 
   5 -12  -6    2.37    0.57 
  -5  12  -6    2.30    0.75 
   5  12   6    2.71    0.66 
  -6 -12  -6    2.36    0.87 
  -6  12   6    0.74    0.86 
   6  12  -6    1.22    0.51 
   6 -12  -6    0.44    0.56 
  -7 -12  -6    1.18    0.87 
   7  12  -6    0.52    0.54 
  -7  12   6   -0.77    0.77 
   7 -12  -6    0.49    0.59 
  -7  12  -6    0.00    0.78 
  -8 -12  -6    1.82    0.98 
  -8  12   6   -0.43    1.08 
   8  12  -6    0.96    0.81 
  -8  12  -6    0.18    0.82 
   8  12   6    0.09    0.75 
   8 -12  -6    0.23    0.66 
   0  13   6    3.06    0.71 
   0  13  -6    2.33    0.49 
   0 -13  -6    2.79    0.39 
   0  13  -6    3.06    0.64 
   0  13   6    3.42    0.59 
  -1  13   6    0.68    0.58 
   1  13  -6    0.99    0.54 
   1  13  -6    0.46    0.36 
  -1  13   6    1.07    0.46 
   1 -13  -6    0.88    0.38 
   1  13   6   -0.08    0.55 
   1  13   6    0.67    0.44 
  -2  13   6    4.09    0.82 
   2  13  -6    4.78    0.79 
  -2 -13  -6    7.08    1.23 
  -2  13   6    4.12    0.60 
  -2  13  -6    6.75    1.16 
   2 -13  -6    5.02    0.70 
   2  13   6    4.31    0.77 
   2  13   6    6.62    1.12 
  -3  13   6    7.07    0.88 
   3  13  -6    4.66    0.88 
   3  13   6    6.37    1.09 
  -3  13  -6    6.85    1.17 
   3  13   6    6.41    1.03 
   3 -13  -6    5.26    0.69 
  -4 -13  -6    1.12    0.85 
  -4  13   6    1.04    0.82 
   4  13  -6    0.88    0.48 
  -4  13  -6    0.31    0.71 
   4  13   6    0.77    0.56 
   4 -13  -6    1.39    0.50 
   5  13  -6    1.36    0.55 
  -5 -13  -6    3.07    1.28 
  -5  13   6    0.18    0.82 
   5  13   6    0.74    0.61 
  -5  13  -6    0.80    0.83 
  -6  13   6    2.87    1.06 
   6  13  -6    3.13    0.66 
   6  13   6    5.29    0.85 
  -6  13  -6    2.86    0.97 
   6 -13  -6    4.50    0.71 
   7  13  -6    0.19    0.60 
  -7 -13  -6    1.96    0.94 
   7 -13  -6    0.94    0.66 
  -7  13  -6    1.48    0.89 
   0  14  -6    4.22    0.79 
   0  14   6    5.22    1.20 
   0  14   6    5.58    0.99 
  -1  14   6   -0.73    0.47 
  -1  14   6    0.50    0.77 
  -1  14  -6    0.09    0.36 
   1 -14  -6    0.11    0.53 
   1  14   6   -0.13    0.47 
   2  14  -6    5.33    0.88 
  -2  14   6    7.04    1.02 
  -2  14   6    6.63    1.03 
   2  14   6    7.85    1.37 
   2 -14  -6    4.99    0.90 
   2  14   6    5.60    1.14 
   3  14  -6   -0.30    0.49 
  -3 -14  -6    1.41    0.81 
  -3  14   6   -0.72    0.43 
   3  14   6    0.81    0.61 
  -3  14  -6    0.48    0.77 
   3  14   6    0.20    0.56 
   3 -14  -6    0.23    0.44 
  -4  14   6    4.87    1.12 
  -4 -14  -6    6.56    1.18 
   4  14   6    4.38    0.83 
   4 -14  -6    5.10    0.62 
  -4  14  -6    3.96    1.32 
   5  14  -6    0.38    0.56 
  -5  14   6   -0.05    0.93 
  -5 -14  -6    2.14    0.97 
   5 -14  -6    1.25    0.63 
   5  14   6    0.39    0.64 
  -5  14  -6    0.33    0.89 
   6  14  -6   -0.32    0.56 
  -6 -14  -6    0.56    0.98 
   6 -14  -6    0.43    0.69 
  -6  14  -6   -0.48    0.96 
   0  15   6    2.52    0.90 
   0  15  -6    2.26    0.49 
   1  15  -6    0.39    0.72 
  -1  15   6   -1.29    0.81 
   1  15  -6    0.58    0.44 
  -1  15   6   -0.26    0.52 
  -1  15  -6    0.56    0.84 
   1  15   6   -0.09    0.65 
  -2  15   6   -0.54    0.61 
   2  15  -6   -0.39    0.47 
   2  15  -6    0.31    0.77 
   2  15   6   -0.01    0.58 
  -2  15  -6   -0.55    0.72 
   2  15   6    0.49    0.89 
   3  15  -6    1.45    0.53 
  -3  15   6    1.57    1.01 
   3  15   6    0.39    0.64 
   3  15   6    3.15    1.00 
  -3  15  -6    3.56    0.94 
  -4  15   6   -0.96    1.03 
   4  15  -6    0.77    0.66 
  -4 -15  -6   -0.11    0.98 
   4 -15  -6   -0.52    0.49 
   4  15   6    1.21    0.73 
  -4  15  -6   -0.75    0.89 
   4  15   6    0.51    0.66 
  -5 -15  -6    1.03    1.16 
  -5  15   6    0.55    1.25 
   5  15  -6    0.03    0.60 
   5 -15  -6    0.30    0.58 
   5  15   6   -1.42    1.28 
   0  16   6    1.28    1.01 
   0  16   6    0.37    0.62 
   1  16  -6   -0.57    0.90 
  -1  16   6   -0.78    0.99 
   1  16  -6   -0.22    0.48 
  -1  16   6    0.81    1.22 
  -1  16  -6    0.48    0.86 
   1  16   6    0.42    1.02 
   1  16   6   -0.09    0.60 
  -2  16   6    2.22    0.64 
  -2  16   6    0.26    1.33 
   2  16  -6    1.79    0.94 
   2  16  -6    0.69    0.54 
  -2  16  -6    1.69    0.93 
   2  16   6    1.28    0.64 
   2  16   6   -0.15    1.02 
   3  16  -6   -1.06    0.55 
   3  16   6    0.10    0.67 
  -3  16  -6   -0.23    0.95 
   3  16   6   -0.91    1.32 
   0   0  -7   -0.02    0.25 
   0   0   7   -0.02    0.31 
  -1   0  -7   88.14    2.90 
   1   0  -7   93.02    2.77 
   1   0  -7   90.75    2.82 
  -1   0   7   90.85    2.77 
  -1   0   7   92.97    2.83 
   1   0  -7   87.71    2.85 
   1   0   7   91.06    2.91 
   2   0  -7  159.78    4.91 
  -2   0   7  164.89    4.83 
   2   0   7  158.61    4.95 
   2   0  -7  169.93    4.90 
  -2   0  -7  159.01    5.00 
  -2   0   7  156.28    4.87 
   2   0  -7  157.93    4.82 
  -3   0  -7   -0.21    0.35 
   3   0   7    0.04    0.20 
   3   0  -7    0.14    0.22 
   3   0   7    0.04    0.20 
  -3   0   7   -0.20    0.25 
   3   0  -7    0.20    0.17 
  -3   0   7   -0.08    0.21 
  -4   0   7  146.31    4.75 
  -4   0  -7  152.06    4.62 
   4   0   7  155.25    4.74 
  -4   0  -7  147.33    4.84 
   4   0  -7  154.54    4.75 
   4   0   7  156.41    4.64 
  -5   0   7   41.05    1.69 
  -5   0  -7   42.50    1.54 
  -5   0  -7   42.05    1.75 
   5   0   7   42.66    1.59 
   6   0   7   18.51    0.98 
  -6   0  -7   16.28    0.97 
   6   0  -7   16.62    0.90 
  -6   0   7   16.64    1.11 
  -6   0  -7   17.73    1.13 
  -7   0  -7    6.76    0.90 
  -7   0   7    5.52    0.84 
   7   0  -7    6.00    0.64 
  -7   0  -7    5.90    0.85 
   7   0   7    6.80    0.79 
  -8   0  -7    4.74    0.85 
   8   0  -7    3.12    0.52 
   9   0  -7    9.49    0.88 
  -9   0  -7    7.61    1.06 
  -9   0   7    9.02    1.13 
 -10   0  -7   23.85    1.98 
 -10   0   7   28.93    1.74 
  10   0  -7   26.88    1.46 
  11   0  -7    3.19    0.71 
 -11   0  -7    4.63    1.10 
 -11   0   7    3.45    0.89 
  11   0  -7    3.92    0.65 
   0   1  -7   98.81    3.09 
   0  -1   7   99.66    3.09 
   0   1   7   98.97    2.95 
   0  -1  -7   97.50    3.11 
   0   1   7   99.08    3.17 
   1   1  -7  204.13    6.26 
   1   1  -7  200.44    6.21 
  -1   1   7  202.81    6.19 
  -1   1   7  213.11    6.26 
  -1  -1  -7  201.20    6.32 
   1   1  -7  220.28    6.19 
   1  -1  -7  215.39    6.19 
  -1  -1   7  213.56    6.22 
   1   1   7  206.31    6.33 
   1  -1  -7  208.37    6.27 
  -1   1  -7  202.01    6.31 
   1  -1  -7  207.29    6.25 
   2   1  -7   64.41    2.05 
  -2   1   7   66.11    2.11 
   2   1  -7   69.86    2.17 
  -2   1   7   65.68    2.16 
   2  -1   7   65.36    2.18 
   2   1  -7   64.46    2.16 
  -2  -1  -7   64.39    2.26 
  -2  -1   7   68.32    2.15 
   2  -1  -7   65.50    2.17 
   2   1   7   65.42    2.23 
   2  -1  -7   68.28    2.12 
   2  -1  -7   68.25    2.16 
  -2   1  -7   66.28    2.26 
  -2  -1   7   67.26    2.05 
   3  -1   7   64.98    2.18 
  -3   1   7   62.77    2.21 
  -3  -1  -7   64.01    2.30 
  -3   1   7   65.09    2.08 
   3  -1   7   68.14    2.07 
   3   1  -7   65.69    2.18 
   3   1   7   65.82    2.24 
   3  -1  -7   65.89    2.19 
  -3   1  -7   65.89    2.30 
  -3  -1   7   64.06    2.19 
  -3   1  -7   66.82    2.06 
   3   1   7   70.62    2.10 
   3  -1  -7   67.29    2.08 
   4  -1   7   62.92    2.03 
  -4  -1  -7   58.97    2.23 
   4   1  -7   61.58    2.08 
   4  -1   7   62.03    2.07 
  -4   1   7   60.41    1.93 
  -4   1   7   59.42    2.16 
  -4  -1   7   60.73    2.14 
   4   1   7   61.77    2.14 
   4   1   7   63.42    2.06 
   4  -1  -7   60.20    2.10 
  -4   1  -7   61.83    2.00 
  -4   1  -7   62.08    2.23 
  -5   1   7   34.92    1.53 
  -5  -1  -7   34.13    1.56 
  -5   1   7   36.39    1.22 
   5  -1   7   34.83    1.35 
   5   1  -7   34.83    1.39 
  -5   1  -7   34.21    1.33 
  -5  -1   7   32.33    1.48 
   5  -1  -7   35.30    1.42 
  -5   1  -7   34.63    1.56 
   5   1   7   34.23    1.43 
   6  -1   7   63.81    2.22 
  -6   1   7   64.20    2.41 
  -6   1   7   64.43    2.03 
  -6  -1  -7   62.21    2.42 
   6   1  -7   62.67    2.24 
   6  -1  -7   62.57    2.26 
  -6  -1   7   62.99    2.39 
   6   1   7   63.92    2.31 
  -6   1  -7   63.79    2.44 
  -6   1  -7   64.71    2.25 
   7   1  -7    1.93    0.40 
  -7   1   7    0.78    0.49 
  -7   1   7    2.40    0.37 
   7  -1   7    1.85    0.39 
  -7   1   7    2.20    0.40 
  -7  -1  -7    1.59    0.63 
  -7  -1   7    1.27    0.49 
   7  -1  -7    2.01    0.42 
  -7   1  -7    1.61    0.65 
  -7   1  -7    1.54    0.51 
  -8  -1  -7   10.06    1.20 
   8  -1   7   11.43    0.91 
  -8   1   7   10.09    0.64 
   8   1  -7   10.01    0.81 
   8  -1  -7   11.38    0.84 
  -8   1  -7   11.41    0.94 
   9   1  -7    2.54    0.55 
  -9  -1  -7    2.34    0.76 
  -9   1   7    2.22    0.68 
   9  -1   7    2.01    0.52 
  -9   1  -7    2.88    0.57 
   9  -1  -7    1.41    0.49 
  -9   1  -7    1.55    0.73 
  -9  -1   7    1.77    0.62 
 -10  -1  -7    3.00    1.23 
  10  -1   7    3.25    0.57 
  10   1  -7    3.06    0.66 
  10  -1  -7    3.61    0.68 
  10  -1  -7    5.56    0.90 
 -10   1  -7    5.45    1.06 
 -11   1   7    4.72    0.95 
 -11  -1  -7    1.50    0.95 
  11   1  -7    3.43    0.70 
  11   1  -7    3.47    0.68 
  11  -1   7    2.38    0.59 
 -11   1  -7    4.14    1.10 
  11  -1  -7    3.02    0.76 
   0   2  -7   36.22    1.28 
   0   2   7   36.58    1.18 
   0   2   7   34.54    1.35 
   0   2  -7   36.39    1.15 
   0  -2  -7   35.66    1.32 
   1   2  -7   60.08    1.96 
   1   2  -7   62.80    1.95 
  -1  -2  -7   61.19    2.10 
  -1   2   7   61.13    1.97 
   1   2  -7   60.17    2.00 
   1   2   7   61.99    1.89 
   1  -2  -7   60.81    2.03 
   1  -2  -7   60.56    2.02 
   1  -2  -7   63.00    1.96 
   1   2   7   59.89    2.10 
  -1   2  -7   65.90    2.15 
  -1   2  -7   58.59    2.06 
  -2   2   7   72.39    2.29 
  -2  -2  -7   68.24    2.40 
  -2   2   7   70.60    2.31 
   2   2  -7   70.58    2.28 
   2   2  -7   68.07    2.17 
   2   2  -7   71.77    2.29 
   2  -2  -7   69.55    2.30 
   2   2   7   74.60    2.19 
   2   2   7   70.64    2.39 
   2  -2  -7   71.51    2.29 
  -2   2  -7   71.79    2.29 
   2  -2  -7   68.94    2.27 
  -2   2  -7   68.21    2.38 
  -2   2  -7   71.97    2.17 
  -3   2   7   68.81    2.38 
  -3   2   7   72.46    2.29 
   3   2  -7   72.39    2.33 
   3  -2   7   75.45    2.25 
  -3  -2  -7   68.85    2.46 
   3  -2   7   73.18    2.31 
  -3   2  -7   68.06    2.45 
   3   2   7   75.03    2.27 
  -3   2  -7   71.98    2.31 
   3  -2  -7   69.98    2.35 
   3  -2  -7   70.26    2.28 
   3   2   7   69.87    2.42 
  -3   2  -7   69.64    2.24 
   4   2  -7    9.83    0.62 
  -4   2   7   10.44    0.80 
   4  -2   7   10.78    0.60 
   4  -2   7   10.37    0.67 
  -4  -2  -7    9.76    0.83 
  -4   2   7   11.13    0.60 
  -4   2  -7   10.73    0.85 
   4  -2  -7   10.98    0.68 
   4   2   7   12.03    0.77 
  -4   2  -7   13.23    0.75 
  -4   2  -7   11.29    0.64 
   4   2   7   11.27    0.76 
  -5   2   7   36.70    1.60 
   5  -2   7   38.37    1.37 
  -5   2   7   37.50    1.32 
   5   2  -7   36.85    1.42 
  -5  -2  -7   36.94    1.62 
  -5   2  -7   36.48    1.42 
  -5  -2   7   34.99    1.55 
  -5   2  -7   35.01    1.60 
   5   2   7   36.22    1.52 
   5  -2  -7   35.91    1.44 
  -6   2   7   14.48    1.10 
   6   2  -7   14.31    0.85 
   6  -2   7   15.16    0.83 
  -6  -2  -7   15.01    1.09 
  -6   2   7   15.49    0.80 
  -6  -2   7   13.19    1.02 
  -6   2  -7   14.84    0.98 
   6  -2  -7   14.59    0.86 
  -6   2  -7   15.21    1.08 
   7   2  -7   16.09    0.89 
  -7   2   7   15.66    1.16 
   7  -2   7   15.44    0.86 
  -7  -2  -7   15.26    1.10 
  -7   2  -7   13.96    1.09 
  -7   2  -7   14.42    1.15 
  -7  -2   7   14.59    1.05 
   7  -2  -7   15.65    0.93 
  -8  -2  -7   10.91    1.34 
   8  -2   7   11.63    0.86 
   8   2  -7   10.34    0.82 
  -8   2   7   11.35    0.72 
   8   2   7   12.34    0.97 
   8  -2  -7   10.97    0.87 
  -8   2  -7   13.96    1.01 
   9  -2   7    1.15    0.47 
   9   2  -7    0.08    0.52 
   9   2  -7    0.31    0.34 
  -9  -2  -7    0.34    0.62 
  -9   2   7    1.96    0.64 
  -9   2   7    1.71    0.51 
   9   2   7    1.11    0.46 
  -9   2  -7    0.98    0.72 
  -9   2  -7    1.75    0.51 
   9  -2  -7    0.82    0.53 
 -10   2   7    0.53    0.64 
  10   2  -7   -0.27    0.67 
  10  -2   7   -0.21    0.46 
  10   2  -7    1.10    0.46 
 -10  -2  -7    1.37    0.94 
  10  -2  -7    0.15    0.50 
 -10   2  -7    2.16    0.98 
 -10   2  -7   -0.41    0.79 
 -11  -2  -7    2.13    0.97 
  11   2  -7    0.45    0.54 
 -11   2   7    1.88    0.83 
  11   2  -7    0.37    0.62 
 -11   2  -7    1.15    0.98 
  11  -2  -7    1.02    0.66 
  11  -2  -7    1.35    0.57 
  11   2   7    0.96    0.79 
   0  -3  -7    0.18    0.30 
   0   3  -7    0.38    0.27 
   0  -3  -7    0.22    0.20 
   0   3   7    0.55    0.23 
   0   3   7    0.43    0.20 
  -1  -3  -7   34.04    1.35 
   1   3  -7   36.02    1.21 
   1   3  -7   35.71    1.21 
  -1   3   7   36.10    1.25 
  -1   3   7   35.51    1.36 
   1  -3  -7   33.85    1.29 
   1  -3  -7   33.74    1.24 
   1   3   7   33.06    1.35 
  -1   3  -7   33.99    1.31 
  -1   3  -7   34.86    1.15 
  -1   3  -7   34.07    1.25 
   1   3   7   34.25    1.17 
   1  -3  -7   34.50    1.22 
   2   3  -7  124.09    3.80 
  -2  -3  -7  126.47    4.05 
  -2   3   7  128.75    3.95 
   2   3  -7  128.59    3.91 
  -2   3  -7  131.99    3.89 
   2  -3  -7  123.87    3.93 
   2   3   7  124.16    4.04 
   2  -3  -7  125.66    3.94 
  -2   3  -7  126.09    3.83 
  -2   3  -7  124.76    4.02 
  -3   3   7   48.55    1.84 
  -3  -3  -7   46.25    1.80 
   3  -3   7   48.22    1.60 
   3   3  -7   47.24    1.64 
   3   3   7   48.69    1.62 
  -3   3  -7   46.99    1.60 
   3  -3  -7   48.12    1.69 
  -3   3  -7   47.08    1.81 
   3   3   7   47.56    1.79 
   4  -3   7   24.95    0.94 
   4   3  -7   24.02    1.01 
  -4   3   7   22.80    1.19 
  -4  -3  -7   24.91    1.24 
  -4   3  -7   25.23    1.05 
   4  -3  -7   24.70    1.08 
  -4   3  -7   24.96    1.25 
  -4   3  -7   24.09    0.95 
   4   3   7   24.86    1.17 
  -5  -3  -7   32.48    1.50 
   5   3  -7   35.02    1.32 
   5  -3   7   35.50    1.22 
  -5   3   7   32.14    1.65 
  -5   3  -7   34.04    1.52 
   5   3   7   29.94    1.62 
   5  -3  -7   35.76    1.38 
  -5   3  -7   29.17    1.20 
  -5   3  -7   33.78    1.36 
  -6  -3  -7   71.78    2.71 
  -6   3   7   73.88    2.74 
   6  -3   7   75.46    2.42 
   6   3  -7   74.70    2.52 
   6  -3  -7   73.02    2.56 
  -6   3  -7   74.52    2.58 
  -6   3  -7   71.05    2.71 
   7   3  -7   16.87    1.05 
   7  -3   7   15.14    0.85 
  -7  -3  -7   16.22    1.12 
  -7   3   7   14.73    1.16 
   7   3   7   15.67    1.06 
  -7   3  -7   16.43    1.16 
   8  -3   7   -0.24    0.33 
   8   3  -7   -0.53    0.33 
  -8   3  -7   -0.49    0.43 
   8   3   7    0.24    0.39 
   9  -3   7    2.86    0.61 
   9   3  -7    5.19    0.79 
   9   3  -7    4.73    0.73 
  -9   3   7    4.30    0.74 
  -9  -3  -7    4.45    0.87 
  -9   3   7    4.71    0.91 
  -9   3  -7    4.71    0.90 
  -9   3  -7    6.75    0.95 
 -10   3   7    1.66    0.72 
 -10  -3  -7    2.41    1.02 
  10   3  -7    2.10    0.51 
  10   3   7    1.26    0.69 
 -10   3  -7    3.25    0.75 
  10  -3  -7    1.52    0.61 
 -10   3  -7    2.98    1.10 
  11   3  -7    0.38    0.59 
  11   3  -7    1.88    0.59 
 -11  -3  -7    1.30    0.91 
 -11   3   7    2.18    0.88 
 -11   3  -7    0.54    1.00 
 -11   3  -7    2.37    0.75 
  11   3   7   -0.33    0.95 
  11  -3  -7    1.31    0.75 
  11  -3  -7    2.13    0.81 
   0   4   7  121.74    4.00 
   0   4  -7  127.56    3.92 
   0  -4  -7  125.63    3.99 
   0   4   7  127.73    3.87 
   0  -4  -7  124.89    3.88 
  -1  -4  -7   18.63    0.93 
   1   4  -7   20.69    0.80 
  -1   4   7   19.34    0.95 
  -1   4   7   19.93    0.92 
   1   4   7   17.79    0.95 
   1  -4  -7   18.90    0.91 
   1  -4  -7   17.59    0.80 
   1   4   7   19.59    0.79 
  -1   4  -7   19.77    0.90 
  -1   4  -7   19.15    0.82 
  -1   4  -7   19.63    0.77 
  -2   4   7  193.03    5.91 
   2   4  -7  194.15    5.83 
   2   4  -7  185.66    5.75 
  -2  -4  -7  192.42    6.01 
  -2   4  -7  191.18    5.97 
  -2   4  -7  196.28    5.81 
   2   4   7  189.57    6.00 
  -2   4  -7  199.14    5.80 
   2  -4  -7  189.59    5.87 
   2  -4  -7  196.65    5.93 
  -3  -4  -7    3.10    0.58 
  -3   4   7    2.98    0.47 
   3  -4   7    3.36    0.50 
   3   4  -7    2.60    0.34 
   3   4   7    2.44    0.41 
  -3   4  -7    2.98    0.53 
  -3   4  -7    3.78    0.50 
   3  -4  -7    2.98    0.45 
  -4   4   7   17.36    1.08 
  -4  -4  -7   15.70    1.36 
   4   4  -7   16.45    0.80 
  -4   4  -7   19.01    0.92 
   4   4   7   18.62    1.07 
  -4   4  -7   18.17    0.71 
  -4   4  -7   17.11    1.28 
  -5   4   7    0.17    0.50 
  -5  -4  -7    0.31    0.49 
   5  -4   7   -0.01    0.18 
   5   4  -7    0.31    0.28 
  -5   4  -7    0.29    0.18 
   5   4   7    0.53    0.37 
  -5   4  -7    0.10    0.38 
   5  -4  -7   -0.27    0.28 
  -5   4  -7   -0.05    0.46 
   6   4  -7    9.98    0.80 
  -6  -4  -7    8.66    0.93 
  -6   4   7    9.86    1.03 
   6  -4   7    9.89    0.58 
   6  -4  -7    9.86    0.75 
  -6   4  -7   10.48    0.93 
  -6   4  -7    9.95    0.51 
  -6   4  -7   10.98    0.93 
  -7   4   7   23.72    1.40 
   7   4  -7   22.01    1.07 
  -7  -4  -7   23.48    1.32 
   7  -4   7   23.02    0.95 
   7   4   7   22.60    1.30 
  -7   4  -7   20.61    1.27 
  -7   4  -7   24.09    1.30 
   8  -4   7    1.95    0.37 
   8   4  -7    2.04    0.43 
   8   4  -7    2.15    0.45 
  -8   4  -7    2.49    0.80 
  -8   4  -7    2.31    0.54 
   9   4  -7    2.11    0.49 
  -9  -4  -7    2.79    0.79 
   9   4  -7    2.39    0.64 
  -9   4  -7    2.11    0.57 
   9   4   7    1.72    0.67 
 -10  -4  -7    4.63    1.50 
 -10   4   7    2.95    0.84 
  10   4  -7    2.22    0.59 
  10   4  -7    2.87    0.61 
  10  -4  -7    3.51    0.69 
 -10   4  -7    1.95    0.93 
  11   4  -7    0.69    0.60 
 -11  -4  -7    0.73    0.91 
  11   4  -7    1.07    0.60 
  11  -4  -7    0.43    0.50 
  11   4   7    0.36    0.70 
 -11   4  -7   -0.06    0.99 
 -11   4  -7    2.16    0.85 
   0  -5  -7    0.87    0.40 
   0  -5  -7    1.04    0.24 
   0   5   7    1.26    0.29 
   0   5   7    1.06    0.29 
  -1  -5  -7   65.76    2.73 
  -1   5   7   67.96    2.39 
  -1   5   7   69.41    2.31 
  -1  -5  -7   69.11    2.25 
   1  -5  -7   67.75    2.37 
  -1   5  -7   69.17    2.24 
   1  -5  -7   70.29    2.26 
   1   5   7   70.35    2.34 
   1   5   7   69.13    2.42 
  -2  -5  -7   88.64    3.03 
  -2   5   7   90.46    2.95 
   2   5  -7   87.64    2.81 
   2  -5  -7   86.52    2.87 
  -2   5  -7   94.77    2.79 
   2   5   7   88.03    3.04 
  -2   5  -7   87.93    2.85 
   2  -5  -7   90.18    2.97 
   3   5  -7    4.64    0.35 
  -3   5   7    3.80    0.71 
   3   5  -7    3.01    0.41 
  -3   5  -7    3.92    0.64 
   3  -5  -7    3.94    0.53 
  -3   5  -7    3.79    0.56 
   3   5   7    3.06    0.55 
  -3   5  -7    3.88    0.36 
  -4  -5  -7    6.96    0.82 
   4   5  -7    7.84    0.55 
  -4   5   7    7.72    0.92 
   4  -5  -7    8.42    0.66 
   4   5   7    9.35    0.84 
  -4   5  -7    9.07    0.75 
  -4   5  -7    8.63    0.83 
   5   5  -7    3.13    0.47 
  -5  -5  -7    3.36    0.67 
  -5   5   7    3.82    0.66 
   5  -5  -7    3.24    0.45 
  -5   5  -7    3.09    0.62 
   5   5   7    4.03    0.69 
  -5   5  -7    3.34    0.54 
  -6  -5  -7   -0.30    0.49 
  -6   5   7    0.65    0.53 
  -6   5  -7    0.15    0.48 
   6  -5  -7   -0.13    0.31 
   7   5  -7   13.71    0.82 
  -7   5   7   14.37    1.28 
  -7  -5  -7   11.61    1.02 
  -7   5  -7   12.78    1.03 
   7   5   7   13.27    1.05 
   8   5  -7    2.66    0.46 
  -8   5   7    2.65    0.68 
  -8   5  -7    2.86    0.77 
  -8   5  -7    2.57    0.60 
   9   5  -7    6.60    0.88 
   9   5  -7    5.61    0.81 
  -9  -5  -7    6.61    1.06 
  -9   5   7    5.34    0.94 
  -9   5  -7    6.86    1.05 
   9  -5  -7    6.88    0.92 
   9   5   7    6.45    1.12 
  -9   5  -7    6.36    1.05 
  10   5  -7    1.79    0.54 
  10   5  -7    2.20    0.59 
 -10  -5  -7    3.93    0.99 
 -10   5   7    2.83    0.86 
 -10   5   7    2.97    0.69 
 -10   5  -7    3.30    0.87 
  10  -5  -7    4.41    0.71 
 -10   5  -7    1.90    0.94 
  10   5   7    2.14    0.71 
 -11   5   7    2.63    1.00 
  11   5  -7    1.46    0.63 
  11   5  -7    1.63    0.83 
 -11  -5  -7    2.84    0.99 
  11   5   7    1.71    0.74 
 -11   5  -7    3.87    1.51 
  11  -5  -7    1.32    0.72 
   0   6   7    1.73    0.36 
   0   6   7    1.36    0.33 
   0  -6  -7    2.16    0.49 
   0  -6  -7    1.68    0.27 
  -1  -6  -7    2.74    0.36 
  -1   6   7    2.49    0.39 
  -1  -6  -7    2.30    0.55 
  -1   6   7    3.96    0.60 
   1   6   7    2.19    0.42 
   1  -6  -7    3.40    0.41 
   1  -6  -7    3.29    0.56 
   1   6   7    3.00    0.48 
  -1   6  -7    3.34    0.46 
  -2   6   7  113.96    3.74 
   2   6  -7  115.29    3.56 
  -2   6   7  114.80    3.78 
  -2   6  -7  118.29    3.53 
  -2   6  -7  114.41    3.65 
   2  -6  -7  114.23    3.64 
   2  -6  -7  114.63    3.77 
   3   6  -7   15.72    0.74 
  -3  -6  -7   15.88    1.04 
   3   6  -7   16.03    0.71 
  -3   6   7   16.70    1.06 
  -3   6  -7   16.53    0.89 
   3  -6  -7   16.01    0.86 
   3   6   7   16.54    1.06 
  -4   6   7   12.61    1.04 
  -4  -6  -7   11.69    0.93 
   4   6  -7   10.99    0.64 
   4   6   7   12.91    0.96 
  -4   6  -7   12.71    0.90 
   4  -6  -7   11.93    0.78 
  -5   6   7   10.77    1.06 
   5   6  -7   10.69    0.73 
  -5  -6  -7    9.43    0.92 
   5   6  -7    9.39    0.63 
  -5   6  -7    8.78    1.01 
  -5   6  -7   10.16    0.95 
   5  -6  -7    9.67    0.71 
   6   6  -7    0.68    0.26 
  -6  -6  -7    1.18    0.55 
  -6   6   7    1.03    0.55 
   6   6  -7    1.23    0.37 
  -6   6  -7    1.25    0.52 
   6  -6  -7    1.10    0.35 
   7   6  -7    7.22    0.66 
  -7   6  -7    6.27    0.89 
  -8   6   7    2.32    0.70 
  -8  -6  -7    2.92    0.77 
   8   6  -7    1.55    0.43 
   8   6   7    2.46    0.56 
  -8   6  -7    2.12    0.78 
  -8   6  -7    3.01    0.62 
   8  -6  -7    1.78    0.53 
   9   6  -7    1.75    0.48 
   9   6  -7    2.27    0.47 
  -9   6   7    1.51    0.76 
  -9  -6  -7    3.34    1.58 
   9  -6  -7    1.65    0.57 
  -9   6  -7    1.66    0.63 
   9   6   7    1.99    0.68 
  -9   6  -7    1.80    0.86 
  10   6  -7    3.35    0.67 
  10   6  -7    2.58    0.58 
 -10  -6  -7    3.92    1.00 
 -10   6   7    2.41    0.87 
 -10   6  -7    2.12    1.02 
  10   6   7    2.40    0.77 
 -10   6  -7    2.08    0.83 
  10  -6  -7    2.38    0.69 
   0   7   7    1.23    0.37 
   0   7   7    1.16    0.43 
   0  -7  -7    1.39    0.27 
  -1  -7  -7    7.71    0.50 
  -1   7   7    8.25    0.72 
  -1   7   7    8.03    0.76 
  -1  -7  -7    7.02    0.79 
  -1   7  -7    7.39    0.62 
   1   7   7    7.45    0.82 
   1  -7  -7    6.61    0.93 
   1   7   7    7.28    0.66 
   1  -7  -7    7.25    0.55 
   2   7  -7    2.70    0.37 
  -2   7   7    3.28    0.54 
  -2   7   7    2.44    0.45 
  -2  -7  -7    2.77    0.39 
  -2  -7  -7    3.44    0.63 
   2  -7  -7    3.71    0.75 
   2  -7  -7    3.14    0.40 
  -2   7  -7    2.66    0.42 
   2   7   7    2.43    0.46 
  -2   7  -7    3.45    0.40 
   3   7  -7   30.10    1.21 
  -3  -7  -7   26.70    1.36 
   3   7  -7   30.68    1.23 
   3   7  -7   26.42    1.05 
   3   7   7   27.61    1.39 
  -3   7  -7   27.13    1.27 
  -4  -7  -7    1.31    0.54 
   4   7  -7    2.44    0.45 
  -4   7   7    1.59    0.55 
   4   7  -7    1.18    0.29 
   4   7  -7    1.67    0.31 
   4   7   7    1.01    0.42 
   4  -7  -7    1.33    0.39 
  -4   7  -7    1.40    0.46 
  -5   7   7    6.59    0.98 
   5   7  -7    5.82    0.55 
   5   7  -7    6.85    0.70 
  -5  -7  -7    6.63    0.80 
   5  -7  -7    5.90    0.63 
   5   7   7    7.03    0.82 
   6   7  -7   17.44    0.99 
   6   7  -7   15.49    0.85 
  -6   7   7   15.53    1.21 
  -6  -7  -7   16.93    1.13 
   6  -7  -7   14.67    0.94 
  -6   7  -7   14.62    1.14 
   7   7  -7    0.60    0.38 
   7   7  -7    1.64    0.40 
  -7   7   7    0.74    0.70 
  -7   7  -7    1.87    0.56 
   7   7   7    1.46    0.54 
   7  -7  -7    1.57    0.47 
   8   7  -7    2.40    0.48 
   8   7  -7    2.49    0.44 
  -8  -7  -7    2.64    0.82 
  -8   7  -7    3.09    0.66 
  -8   7  -7    3.86    1.03 
   8   7   7    1.28    0.72 
  -9   7   7    0.24    0.77 
   9   7  -7    0.57    0.44 
  -9  -7  -7    0.14    0.79 
   9   7  -7   -0.67    0.43 
  -9   7  -7   -0.49    0.80 
   9  -7  -7   -0.60    0.55 
  -9   7  -7    0.20    0.64 
   9   7   7   -0.48    0.86 
 -10  -7  -7    1.71    0.96 
 -10   7   7    1.34    0.89 
  10   7  -7    0.43    0.58 
  10   7  -7    0.19    0.53 
  10  -7  -7   -0.47    0.71 
 -10   7  -7    0.36    0.95 
  10   7   7   -0.74    0.64 
 -10   7  -7   -0.72    0.71 
   0  -8  -7   20.20    1.17 
   0   8   7   21.52    1.54 
   0   8   7   21.58    1.18 
   0  -8  -7   20.58    0.91 
   0   8  -7   22.83    0.90 
  -1   8   7   13.92    0.97 
   1   8  -7   14.20    0.72 
  -1  -8  -7   14.31    0.68 
  -1   8   7   14.78    0.99 
  -1  -8  -7   13.74    0.96 
   1   8   7   14.14    0.93 
   1  -8  -7   12.96    1.27 
  -1   8  -7   14.54    0.64 
   1   8   7   14.85    1.02 
   1  -8  -7   14.34    0.75 
  -1   8  -7   13.27    0.87 
  -2   8   7    5.43    0.82 
  -2  -8  -7    5.08    0.46 
  -2   8   7    5.62    0.84 
   2   8  -7    5.42    0.44 
  -2  -8  -7    4.36    0.75 
   2   8  -7    5.38    0.55 
   2  -8  -7    5.49    0.58 
  -2   8  -7    6.17    0.37 
  -2   8  -7    6.41    0.71 
   2   8   7    6.05    0.77 
  -3   8   7    0.32    0.48 
  -3  -8  -7    0.13    0.46 
   3   8  -7    0.37    0.24 
   3   8  -7    0.14    0.22 
   3  -8  -7    0.35    0.33 
  -3   8  -7    0.21    0.42 
   3   8   7    0.41    0.39 
   4   8  -7    3.26    0.44 
  -4  -8  -7    4.10    0.69 
  -4   8   7    2.88    0.60 
   4   8  -7    3.03    0.50 
   4  -8  -7    3.37    0.47 
  -5  -8  -7   16.51    1.13 
   5   8  -7   17.51    0.98 
   5   8  -7   16.47    0.81 
  -5   8   7   17.04    1.24 
  -5   8  -7   17.14    1.16 
   5  -8  -7   15.87    0.95 
   6   8  -7    2.29    0.37 
   6   8  -7    1.76    0.41 
  -6   8  -7    1.97    0.60 
   7   8  -7    5.66    0.77 
  -7   8   7    4.51    0.83 
   7   8  -7    4.26    0.65 
  -7  -8  -7    5.48    0.92 
  -7   8  -7    4.19    0.74 
   7  -8  -7    4.73    0.65 
   7   8   7    4.50    0.70 
  -7   8  -7    4.22    1.20 
   8   8  -7    1.31    0.44 
  -8  -8  -7    3.14    0.96 
   8   8  -7    1.87    0.49 
  -8   8   7    1.39    0.74 
  -8   8  -7    1.40    0.76 
   8  -8  -7    1.25    0.56 
   8   8   7    0.72    0.59 
  -8   8  -7    1.87    0.64 
  -9  -8  -7    4.78    0.99 
   9   8  -7    3.42    0.54 
   9   8  -7    2.97    0.62 
  -9   8   7    3.27    0.95 
  -9   8  -7    4.17    1.06 
   9  -8  -7    3.41    0.73 
   9   8   7    2.11    0.74 
  10   8  -7   -0.40    0.61 
 -10  -8  -7    1.75    0.92 
 -10   8   7    0.41    1.07 
  10   8  -7    0.23    0.54 
  10   8   7   -0.54    0.82 
 -10   8  -7    0.20    0.76 
  10  -8  -7    0.29    1.02 
   0  -9  -7   36.88    1.67 
   0   9  -7   35.96    1.36 
   0   9   7   38.00    1.64 
   0   9   7   34.79    1.62 
   0  -9  -7   36.20    1.34 
  -1   9   7    6.15    0.84 
  -1   9   7    5.90    0.79 
   1   9  -7    5.62    0.52 
  -1  -9  -7    5.94    0.50 
  -1  -9  -7    5.82    0.77 
   1   9  -7    6.13    0.49 
   1   9   7    5.03    0.77 
   1  -9  -7    5.06    0.54 
  -1   9  -7    5.35    0.45 
   1   9   7    5.12    0.79 
   1  -9  -7    5.68    0.80 
   2   9  -7    6.85    0.49 
   2   9  -7    7.77    0.60 
  -2   9   7    8.21    0.91 
  -2  -9  -7    7.62    0.52 
  -2  -9  -7    7.69    0.92 
  -2   9  -7    5.41    1.00 
   2   9   7    5.84    0.80 
  -2   9  -7    8.15    0.48 
   2   9   7    7.04    0.84 
   2  -9  -7    6.75    0.66 
  -3  -9  -7    2.61    0.34 
   3   9  -7    2.71    0.40 
  -3  -9  -7    2.28    0.60 
  -3   9   7    1.50    0.54 
   3  -9  -7    1.97    0.41 
   3   9   7    1.94    0.50 
  -3   9  -7    2.14    0.52 
  -4   9   7    5.02    0.91 
   4   9  -7    4.09    0.57 
   4   9  -7    4.65    0.46 
  -4  -9  -7    5.32    0.83 
  -4   9  -7    5.43    0.86 
   4  -9  -7    4.42    0.62 
   5   9  -7    0.73    0.30 
   5   9  -7    0.38    0.31 
   5  -9  -7    0.58    0.38 
  -5   9  -7    0.68    0.52 
  -6   9   7    1.59    0.68 
   6   9  -7    0.92    0.37 
   6   9  -7    1.71    0.37 
  -6   9  -7    1.83    0.61 
  -7  -9  -7    2.82    0.81 
   7   9  -7    2.05    0.45 
   7   9  -7    1.50    0.45 
  -7   9  -7    2.46    0.68 
   7  -9  -7    2.77    0.56 
  -7   9  -7    2.20    0.82 
  -8  -9  -7    0.71    0.83 
   8   9  -7    0.39    0.45 
   8   9  -7    0.20    0.43 
  -8   9   7   -0.10    0.75 
  -8   9  -7    1.31    0.84 
   8  -9  -7   -0.35    0.62 
   8   9   7    0.11    0.60 
  -8   9  -7   -0.01    0.68 
   9   9  -7    0.77    0.53 
  -9  -9  -7    1.85    1.00 
   9   9  -7    1.69    0.48 
  -9   9   7    0.93    0.93 
   9  -9  -7    2.03    0.71 
   9   9   7    0.30    0.72 
  -9   9  -7    0.87    0.89 
  -9   9  -7    0.79    0.77 
   0  10  -7   11.83    0.73 
   0  10  -7   12.44    0.91 
   0 -10  -7   11.97    0.69 
   0 -10  -7   12.21    1.04 
   0  10   7   12.22    1.05 
   0  10   7   11.67    0.99 
  -1 -10  -7   29.51    1.14 
  -1  10   7   30.17    1.51 
   1  10  -7   29.99    1.11 
  -1  10   7   28.52    1.56 
   1  10  -7   28.95    1.28 
   1 -10  -7   29.86    1.20 
   1  10   7   31.71    1.50 
   1  10   7   29.75    1.50 
  -1  10  -7   29.61    1.44 
   1 -10  -7   29.05    1.53 
  -1  10  -7   31.70    1.20 
   2  10  -7   11.15    0.78 
   2  10  -7   11.58    0.74 
  -2  10   7    9.32    0.89 
  -2  10   7   10.59    1.01 
  -2 -10  -7   11.05    0.62 
  -2  10  -7    9.01    0.89 
   2  10   7   11.01    0.89 
   2  10   7    9.66    0.95 
   2 -10  -7   10.14    0.84 
  -2  10  -7   10.67    0.57 
   3  10  -7    3.56    0.40 
  -3 -10  -7    3.46    0.47 
   3  10  -7    3.40    0.54 
  -3  10   7    3.42    0.65 
   3  10   7    3.23    0.58 
   3 -10  -7    3.77    0.51 
  -3  10  -7    3.60    0.59 
   4  10  -7   14.06    0.99 
   4  10  -7   12.26    0.64 
  -4 -10  -7   13.77    0.73 
  -4  10  -7   13.18    1.11 
   4  10   7   11.99    1.11 
   4 -10  -7   13.56    0.86 
   5  10  -7    5.91    0.75 
   5  10  -7    6.41    0.93 
  -5 -10  -7    6.90    0.94 
  -5  10  -7    5.27    0.76 
   5 -10  -7    7.00    0.76 
   6  10  -7    0.22    0.37 
  -6  10   7    0.54    0.69 
   6  10  -7   -0.17    0.32 
  -6 -10  -7    0.76    0.71 
  -6  10  -7   -0.53    0.58 
   6 -10  -7   -0.05    0.60 
  -7 -10  -7    1.24    0.93 
   7  10  -7    0.02    0.41 
  -7  10   7    0.48    0.74 
   7  10  -7    0.48    0.38 
  -7  10  -7   -0.26    0.63 
  -8 -10  -7    4.94    1.07 
  -8  10   7    4.49    1.02 
   8  10  -7    2.89    0.62 
  -8  10  -7    2.10    0.90 
   8 -10  -7    2.78    0.69 
  -8  10  -7    3.58    1.00 
  -9 -10  -7    1.59    0.97 
   9  10  -7    1.98    0.60 
   9 -10  -7    1.60    0.75 
   9  10   7    0.60    0.94 
  -9  10  -7    1.52    0.87 
  -9  10  -7    2.81    1.34 
   0  11   7    0.28    0.48 
   0 -11  -7    0.43    0.31 
   0  11   7    0.45    0.47 
   0  11  -7    0.52    0.40 
   0  11  -7    0.50    0.30 
   1  11  -7   13.45    0.99 
  -1  11   7   14.56    1.04 
  -1  11   7   13.55    1.24 
  -1 -11  -7   13.48    0.71 
   1  11  -7   14.18    0.66 
   1  11   7   12.98    1.05 
  -1  11  -7   12.24    0.80 
   1  11   7   14.24    1.10 
  -1  11  -7   12.65    1.04 
   1 -11  -7   13.22    0.78 
  -2  11   7    5.38    0.82 
   2  11  -7    4.91    0.49 
   2  11  -7    6.06    0.65 
  -2  11   7    4.80    0.73 
  -2 -11  -7    5.22    0.53 
  -2  11  -7    4.24    0.64 
   2  11   7    5.30    0.90 
  -2  11  -7    4.06    0.49 
   2  11   7    6.12    0.86 
   3  11  -7    3.72    0.61 
   3  11  -7    3.94    0.40 
  -3 -11  -7    3.43    0.51 
   3 -11  -7    4.27    0.62 
  -3  11  -7    4.05    0.66 
   3  11   7    3.69    0.62 
  -4 -11  -7    1.67    0.65 
   4  11  -7    0.88    0.27 
  -4  11   7    0.16    1.07 
   4  11  -7    0.86    0.35 
  -4 -11  -7    0.97    0.33 
  -4  11  -7    0.94    0.55 
   4 -11  -7    0.48    0.38 
   4  11   7    0.42    0.47 
   5  11  -7    1.12    0.40 
  -5 -11  -7    2.71    0.75 
  -5 -11  -7    1.27    0.39 
  -5  11   7    1.90    0.76 
  -5  11  -7    0.01    0.60 
  -6  11   7   -0.09    0.69 
   6  11  -7    1.56    0.48 
   6  11   7    1.42    0.57 
  -6  11  -7    0.53    0.67 
   6 -11  -7    0.94    0.51 
  -7  11   7    0.12    0.79 
   7  11  -7    0.27    0.44 
  -7 -11  -7    1.04    0.89 
   7 -11  -7    1.72    0.67 
  -8  11   7    1.72    1.02 
  -8 -11  -7    2.42    1.02 
   8  11  -7    2.61    0.62 
   8 -11  -7    1.99    0.71 
  -8  11  -7    3.89    1.64 
   0 -12  -7    1.85    0.38 
   0  12  -7    1.43    0.42 
   0  12   7    1.59    0.50 
   0  12  -7    1.48    0.52 
   1  12  -7   -0.62    0.33 
  -1  12   7    0.01    0.40 
   1  12  -7    0.24    0.25 
  -1 -12  -7    0.37    0.31 
  -1  12  -7   -0.15    0.45 
   1  12   7   -0.42    0.39 
  -1  12  -7   -0.39    0.28 
   1 -12  -7   -0.35    0.34 
  -2 -12  -7    4.72    0.53 
  -2  12   7    4.91    0.84 
   2  12  -7    4.29    0.71 
  -2  12  -7    4.11    0.70 
   2  12   7    3.81    0.85 
   2 -12  -7    4.30    0.67 
  -3  12   7    4.29    0.86 
   3  12  -7    4.35    0.77 
  -3 -12  -7    5.34    0.64 
  -3 -12  -7    7.25    1.07 
   3  12   7    4.37    0.68 
  -3  12  -7    5.92    1.04 
   3 -12  -7    6.41    0.70 
   4  12  -7    7.07    0.86 
  -4  12   7    7.60    1.24 
   4 -12  -7    7.82    0.79 
  -4  12  -7    6.98    1.22 
  -5  12   7    5.57    1.03 
  -5 -12  -7    6.34    1.07 
   5  12   7    2.97    0.71 
  -5  12  -7    4.37    0.85 
   6  12  -7    2.41    0.53 
  -6 -12  -7    3.18    1.01 
   6 -12  -7    2.42    0.61 
   6  12   7    2.15    0.66 
   7  12  -7   -0.28    0.49 
  -7 -12  -7    1.18    0.88 
  -7  12   7   -0.58    0.84 
   7 -12  -7   -0.06    0.61 
   7  12   7    0.26    0.65 
  -7  12  -7    0.19    0.80 
   8  12  -7    0.46    0.61 
  -8 -12  -7    0.09    0.94 
   8 -12  -7   -0.05    0.69 
   0 -13  -7    0.15    0.35 
   0  13   7    0.14    0.60 
   0  13  -7    0.59    0.53 
   0  13  -7   -0.87    0.57 
   0  13   7    0.79    0.47 
   1  13  -7    0.96    0.60 
   1  13  -7   -0.07    0.35 
  -1  13   7   -0.67    0.41 
  -1  13   7    0.28    0.63 
  -1 -13  -7    0.02    0.40 
   1  13   7    0.08    0.47 
   1  13   7   -0.10    0.61 
   1 -13  -7    0.12    0.38 
  -1  13  -7    0.09    0.54 
  -2  13   7   -0.07    0.71 
  -2  13   7    0.73    0.47 
  -2 -13  -7    0.82    0.75 
   2  13   7    0.43    0.47 
   2  13   7    1.21    0.65 
  -2  13  -7    0.30    0.56 
   2 -13  -7    0.68    0.45 
  -3  13   7    5.04    1.34 
  -3 -13  -7    8.34    1.22 
   3  13  -7    5.23    0.89 
   3  13   7    8.62    1.34 
   3  13   7    9.45    1.11 
  -3  13  -7    7.67    1.28 
   3 -13  -7    6.22    0.76 
   4  13  -7   -0.10    0.44 
  -4 -13  -7   -0.18    0.75 
  -4  13  -7   -0.60    0.70 
   4 -13  -7    0.27    0.44 
   4  13   7   -0.55    0.54 
  -5  13   7    2.10    0.95 
  -5 -13  -7    2.61    0.94 
   5  13  -7    1.76    0.56 
  -5  13  -7    1.41    0.94 
   5 -13  -7    0.25    0.50 
   5  13   7    1.06    0.63 
   6  13  -7    0.56    0.52 
  -6 -13  -7    2.12    0.96 
  -6  13   7    0.64    0.98 
   6  13   7    0.95    0.70 
   6 -13  -7    0.19    0.68 
  -7  13   7   -0.80    1.01 
  -7 -13  -7    0.30    1.01 
   7  13   7    0.02    0.72 
  -7  13  -7   -1.16    0.86 
   7 -13  -7    0.07    0.73 
   0  14  -7    0.22    0.43 
   0  14   7   -0.78    0.47 
   0  14   7   -0.46    0.76 
   1  14  -7    1.93    0.87 
  -1  14   7    2.31    0.88 
   1  14  -7    1.71    0.49 
  -1  14   7    1.85    0.56 
   1  14   7    1.05    0.92 
   1 -14  -7    1.32    0.48 
   1  14   7    0.37    0.62 
  -2  14   7    2.79    1.06 
   2  14  -7    3.03    0.55 
  -2  14   7    2.81    0.57 
  -2 -14  -7    4.45    1.02 
   2  14   7    3.74    0.94 
   2 -14  -7    3.53    0.52 
  -3 -14  -7    2.76    0.98 
   3  14  -7    1.09    0.50 
  -3  14   7   -0.30    0.90 
  -3  14  -7    2.12    0.83 
   3  14   7    1.14    0.62 
   3  14   7    1.66    0.89 
  -4  14   7    0.08    1.00 
  -4 -14  -7    2.31    1.00 
   4  14  -7    0.87    0.53 
  -4  14  -7    0.17    0.84 
   4  14   7    0.14    0.64 
   4  14   7    1.85    0.68 
   4 -14  -7    0.25    0.54 
  -5 -14  -7    1.48    1.02 
   5  14  -7   -0.15    0.52 
  -5  14   7    0.13    0.98 
   5  14   7    0.13    0.67 
  -5  14  -7    0.21    0.93 
   5 -14  -7    0.01    0.57 
  -6  14   7    3.20    1.31 
   6  14  -7    1.53    0.65 
  -6 -14  -7    4.78    1.51 
  -6  14  -7    1.26    1.04 
   6  14   7    1.75    0.83 
   6 -14  -7    2.15    0.68 
   0  15  -7   -0.09    0.76 
   0  15   7    0.01    0.63 
   0  15   7   -0.03    0.99 
   0  15  -7   -0.37    0.43 
  -1  15   7   -0.32    0.61 
   1  15  -7    1.59    0.82 
   1  15  -7    0.10    0.44 
  -1  15   7   -0.01    0.89 
   1  15   7    0.08    0.94 
   1  15   7    0.98    0.61 
  -1  15  -7    0.69    0.77 
  -2  15   7    1.18    0.59 
   2  15  -7    0.39    0.48 
  -2  15   7    1.16    1.00 
   2  15  -7    2.54    0.94 
  -2  15  -7    1.58    0.82 
   2  15   7    0.07    0.60 
   2  15   7    1.04    0.93 
   3  15  -7   -0.35    0.80 
  -3  15   7   -1.87    0.99 
  -3 -15  -7    0.79    1.05 
   3  15   7    1.94    0.97 
   3  15   7    1.24    0.67 
  -3  15  -7   -0.05    0.87 
   4  15  -7    0.38    0.58 
  -4 -15  -7    3.03    1.36 
  -4  15   7   -0.08    1.42 
   4  15   7    1.84    0.78 
  -4  15  -7    1.25    1.00 
   4  15   7    1.28    0.76 
   0  16   7    0.42    0.66 
   0  16   7    0.31    1.05 
   0  16  -7    0.14    0.86 
  -1  16   7   -0.93    0.64 
  -1  16   7   -1.38    1.10 
   1  16  -7   -0.42    0.49 
   1  16  -7    0.09    0.90 
   1  16   7   -0.16    0.63 
   1  16   7    0.11    1.06 
  -1  16  -7   -1.51    0.87 
   2  16  -7    0.80    1.09 
  -2  16   7   -0.77    0.75 
   2  16  -7    0.25    0.54 
   2  16   7   -0.02    0.69 
  -2  16  -7    1.18    0.95 
   2  16   7    0.63    1.19 
   0   0  -8    0.75    0.33 
   1   0  -8   45.11    1.59 
  -1   0   8   46.57    1.51 
   1   0  -8   46.95    1.49 
   1   0   8   45.13    1.65 
  -1   0   8   47.85    1.60 
   1   0  -8   44.75    1.56 
  -1   0  -8   43.49    1.64 
  -2   0   8   16.41    0.71 
   2   0  -8   16.84    0.77 
  -2   0   8   15.96    0.72 
   2   0  -8   16.25    0.68 
   2   0  -8   16.26    0.77 
   2   0   8   16.47    0.81 
  -2   0  -8   15.60    0.86 
   3   0   8   35.09    1.40 
  -3   0  -8   37.50    1.61 
   3   0   8   37.51    1.21 
   3   0  -8   36.76    1.22 
  -3   0   8   36.23    1.22 
   3   0  -8   38.88    1.45 
  -3   0   8   35.60    1.37 
  -4   0   8   11.07    0.79 
   4   0   8   11.67    0.76 
   4   0   8   13.05    0.69 
   4   0  -8   12.94    0.74 
  -5   0   8  128.15    4.28 
  -5   0  -8  129.41    4.37 
   5   0   8  136.67    4.49 
   5   0  -8  135.04    4.23 
  -6   0  -8    5.85    0.87 
  -6   0   8    5.35    0.85 
   6   0   8    7.96    0.76 
   6   0  -8    6.31    0.63 
   7   0   8   16.67    1.07 
   7   0  -8   16.62    0.95 
  -7   0  -8   16.85    1.18 
  -7   0  -8   19.09    1.20 
  -7   0   8   16.59    1.12 
   8   0   8    7.26    0.90 
   8   0  -8    7.86    0.72 
  -9   0  -8    7.19    1.09 
  -9   0   8    8.50    1.14 
   9   0  -8    8.08    0.88 
   9   0   8    7.78    0.92 
  10   0  -8    5.10    0.73 
  10   0   8    3.27    0.64 
 -10   0  -8    5.66    1.07 
 -11   0   8    2.18    0.98 
  11   0  -8    1.40    0.66 
  11   0  -8    1.81    0.60 
 -11   0  -8    1.44    0.97 
   0  -1  -8  128.27    4.01 
   0   1  -8  128.17    3.98 
   1   1  -8    0.24    0.21 
  -1   1   8    0.44    0.21 
  -1  -1  -8    0.57    0.35 
   1   1  -8    0.69    0.27 
   1   1  -8    0.54    0.25 
   1  -1  -8    0.08    0.27 
  -1  -1   8    0.72    0.29 
   1  -1  -8    0.73    0.22 
   1  -1  -8    0.37    0.22 
  -1   1  -8    0.48    0.33 
   1   1   8    0.37    0.24 
  -2   1   8    4.20    0.46 
   2   1  -8    4.67    0.42 
   2   1  -8    4.63    0.54 
  -2  -1  -8    4.12    0.57 
   2  -1   8    4.69    0.46 
  -2   1   8    5.34    0.48 
   2   1  -8    4.19    0.36 
  -2  -1   8    4.99    0.38 
   2  -1  -8    3.83    0.39 
   2  -1  -8    4.30    0.50 
   2   1   8    4.41    0.50 
   2  -1  -8    4.44    0.43 
  -2   1  -8    3.46    0.56 
  -3  -1  -8   18.33    1.03 
   3  -1   8   20.10    0.74 
  -3   1   8   19.02    0.81 
   3  -1   8   19.24    0.93 
  -3   1   8   19.66    1.00 
   3   1  -8   19.48    0.88 
  -3  -1   8   20.20    0.92 
   3   1   8   20.10    0.97 
   3  -1  -8   20.53    0.80 
  -3   1  -8   19.58    1.04 
   3  -1  -8   20.85    0.91 
  -3   1  -8   21.03    0.73 
   3   1   8   21.13    0.78 
  -4   1   8    1.83    0.32 
  -4   1   8    1.20    0.41 
   4  -1   8    1.28    0.31 
   4   1  -8    1.40    0.35 
   4  -1   8    1.10    0.29 
  -4   1  -8    1.29    0.29 
   4   1   8    0.98    0.32 
  -4  -1   8    0.69    0.35 
   4   1   8    1.04    0.35 
  -5   1   8    3.49    0.42 
   5   1  -8    3.51    0.56 
   5  -1   8    2.59    0.40 
  -5   1   8    2.93    0.55 
  -5  -1  -8    3.67    0.71 
  -5   1  -8    3.65    0.69 
   5  -1  -8    3.54    0.56 
   5   1   8    2.76    0.46 
  -5  -1   8    3.01    0.54 
  -5   1  -8    2.91    0.40 
  -6   1   8   57.49    2.24 
  -6  -1  -8   55.91    2.26 
   6   1  -8   57.29    2.07 
   6  -1   8   59.39    2.08 
  -6  -1   8   55.03    2.19 
   6   1   8   59.57    2.21 
  -6   1  -8   56.27    2.04 
   6  -1  -8   56.00    2.09 
  -6   1  -8   55.75    2.28 
   7   1  -8    6.95    0.93 
  -7   1   8    6.10    0.88 
  -7  -1  -8    6.61    0.87 
   7  -1   8    7.31    0.75 
  -7   1  -8    8.21    0.84 
   7   1   8    6.72    0.84 
  -7  -1   8    5.39    0.80 
   7  -1  -8    6.75    0.69 
  -7   1  -8    7.26    0.89 
   8  -1   8    1.74    0.55 
   8   1  -8    2.65    0.47 
   8   1   8    2.62    0.52 
  -8   1  -8    2.42    0.52 
   8  -1  -8    2.72    0.50 
   9  -1   8    0.50    0.43 
  -9  -1  -8    0.44    0.71 
   9   1  -8    0.71    0.48 
  -9   1   8    1.12    0.64 
   9  -1  -8    0.93    0.74 
   9   1   8   -0.06    0.45 
  -9  -1   8    0.42    0.61 
  -9   1  -8    0.75    0.72 
  -9   1  -8    1.67    0.58 
 -10  -1  -8    0.07    0.83 
  10   1  -8    0.88    0.47 
 -10   1   8    1.36    0.68 
  10  -1  -8    1.29    0.59 
 -10  -1   8    2.59    0.74 
 -10   1  -8   -0.98    1.52 
  11   1  -8   -0.20    0.51 
 -11  -1  -8   -0.24    0.90 
  11  -1   8   -0.23    0.58 
  11   1  -8    1.80    0.63 
 -11   1   8    1.49    0.92 
  11  -1  -8    0.11    0.67 
  11   1   8   -0.80    0.57 
  11  -1  -8    0.99    0.51 
 -11   1  -8   -0.53    0.92 
   0   2  -8   15.69    0.75 
   0   2   8   15.88    0.63 
   0   2  -8   16.35    0.60 
   0  -2  -8   14.76    0.79 
   0   2   8   15.35    0.83 
  -1   2   8    6.55    0.48 
   1   2  -8    6.75    0.44 
   1   2  -8    6.16    0.45 
   1   2  -8    5.85    0.44 
  -1  -2  -8    5.48    0.57 
   1  -2  -8    5.40    0.46 
   1  -2  -8    6.33    0.50 
  -1   2  -8    5.91    0.55 
   1   2   8    6.03    0.57 
   1  -2  -8    6.34    0.42 
  -2   2   8    0.43    0.28 
   2   2  -8    0.43    0.23 
  -2  -2  -8    0.44    0.39 
   2   2  -8    0.32    0.22 
   2   2  -8    0.34    0.27 
   2  -2  -8    0.00    0.30 
   2   2   8    0.12    0.24 
   2  -2  -8    0.66    0.28 
   2   2   8    0.48    0.18 
  -2   2  -8   -0.34    0.35 
   2  -2  -8    0.10    0.22 
   3  -2   8    6.59    0.52 
  -3  -2  -8    6.12    0.69 
   3  -2   8    7.15    0.43 
  -3   2   8    7.90    0.56 
   3   2  -8    5.99    0.51 
  -3   2  -8    6.94    0.44 
   3   2   8    6.58    0.64 
   3  -2  -8    6.80    0.48 
   3  -2  -8    6.25    0.55 
  -3   2  -8    6.24    0.69 
   3   2   8    7.93    0.51 
   4  -2   8   12.10    0.68 
  -4   2   8   13.14    0.68 
   4  -2   8   11.35    0.68 
  -4  -2  -8   11.87    1.04 
   4   2  -8   12.31    0.74 
  -4   2   8   11.98    0.88 
  -4   2  -8   12.33    0.73 
   4   2   8   12.30    0.77 
   4  -2  -8   10.83    0.84 
   4   2   8   13.13    0.85 
   5   2  -8    3.99    0.55 
   5  -2   8    3.64    0.52 
  -5  -2  -8    3.18    0.68 
  -5   2   8    4.19    0.53 
  -5   2   8    2.98    0.60 
  -5   2  -8    4.25    0.75 
  -5   2  -8    4.08    0.59 
   5   2   8    3.97    0.71 
   5  -2  -8    3.34    0.46 
   6   2  -8   31.80    1.31 
  -6   2   8   31.45    1.18 
   6  -2   8   30.60    1.27 
  -6  -2  -8   30.50    1.53 
  -6   2   8   30.94    1.52 
  -6   2  -8   29.57    1.34 
  -6   2  -8   29.29    1.48 
   6  -2  -8   29.62    1.33 
   6   2   8   30.85    1.47 
  -6  -2   8   27.95    1.44 
   7  -2   8    3.24    0.46 
   7   2  -8    3.38    0.47 
  -7  -2  -8    4.56    0.78 
  -7   2   8    4.53    0.86 
   7   2   8    3.80    0.57 
  -7  -2   8    2.89    0.59 
  -7   2  -8    4.65    0.72 
   7  -2  -8    3.18    0.51 
  -7   2  -8    3.23    0.57 
  -8   2   8   23.70    1.00 
   8  -2   8   23.33    1.19 
   8   2  -8   23.68    1.23 
  -8   2  -8   25.90    1.30 
  -8   2  -8   21.71    1.63 
   8   2   8   24.43    1.34 
   8  -2  -8   22.68    1.28 
  -9   2   8   11.84    2.15 
   9  -2   8   12.33    1.30 
   9   2  -8   10.63    0.94 
  -9  -2  -8   12.12    1.22 
  -9   2  -8   13.61    1.09 
   9   2   8    9.03    1.05 
   9  -2  -8   10.69    1.21 
  10  -2   8    4.44    0.64 
  10   2  -8    6.39    0.93 
 -10  -2  -8    7.00    1.30 
 -10   2   8    9.57    1.33 
  10   2  -8    8.41    1.00 
  10   2   8    4.95    0.72 
  10  -2  -8    9.21    1.02 
 -10   2  -8    7.42    1.19 
 -11  -2  -8    1.36    0.92 
 -11   2   8    2.43    1.75 
  11   2  -8   -0.15    0.61 
  11   2  -8    0.36    0.54 
  11  -2  -8    0.04    0.50 
 -11   2  -8    0.39    1.01 
  11  -2  -8    0.14    0.78 
   0  -3  -8   57.22    1.91 
   0  -3  -8   55.12    1.98 
   0   3   8   57.38    2.04 
   0   3  -8   56.04    1.92 
   0   3   8   58.34    1.84 
   1   3  -8   18.45    0.80 
  -1   3   8   19.63    0.84 
   1   3  -8   19.54    0.79 
  -1  -3  -8   19.15    0.96 
   1   3   8   18.14    0.95 
   1   3   8   20.04    0.75 
   1  -3  -8   19.45    0.81 
   1  -3  -8   18.84    0.90 
  -1   3  -8   19.43    0.92 
   1  -3  -8   19.36    0.85 
  -1   3  -8   20.41    0.71 
   2   3  -8   29.47    1.03 
  -2   3   8   29.55    1.20 
  -2  -3  -8   29.81    1.38 
   2   3  -8   29.16    1.13 
   2   3   8   29.78    1.28 
  -2   3  -8   28.78    1.27 
  -2   3  -8   30.24    1.03 
   2  -3  -8   30.58    1.18 
   2  -3  -8   29.99    1.17 
  -3   3   8    8.50    0.75 
   3   3  -8    9.14    0.59 
  -3  -3  -8    8.31    0.80 
  -3   3  -8    8.72    0.57 
   3   3   8    9.88    0.59 
   3   3   8    9.58    0.76 
   3  -3  -8   10.37    0.67 
  -3   3  -8   10.52    0.72 
  -3   3  -8    9.01    0.80 
   3  -3  -8    9.73    0.60 
  -4  -3  -8    1.99    0.58 
  -4   3   8    1.90    0.48 
   4  -3   8    2.21    0.40 
   4   3  -8    2.24    0.38 
   4  -3   8    1.89    0.44 
   4  -3  -8    2.07    0.40 
   4   3   8    1.92    0.42 
  -4   3  -8    2.70    0.61 
  -4   3  -8    1.94    0.36 
  -4   3  -8    1.86    0.39 
  -5  -3  -8    3.72    0.71 
   5  -3   8    3.32    0.47 
  -5   3  -8    3.87    0.67 
   5   3   8    3.44    0.52 
   5  -3  -8    3.59    0.53 
  -5   3  -8    2.72    0.44 
   6   3  -8    7.02    0.67 
  -6   3   8    6.61    0.97 
   6  -3   8    5.47    0.60 
  -6  -3  -8    7.80    0.90 
   6   3   8    6.42    0.84 
  -6   3  -8    7.18    0.82 
   7  -3   8    1.99    0.37 
  -7   3   8    2.56    0.59 
  -7  -3  -8    3.02    0.73 
   7   3  -8    3.22    0.50 
  -7   3  -8    2.73    0.62 
   7   3   8    2.06    0.48 
   8   3  -8    7.46    0.75 
   8  -3   8    6.53    0.75 
   8   3   8    7.60    0.94 
  -8   3  -8    7.57    1.00 
  -8   3  -8    8.69    0.92 
   9   3  -8    9.11    0.86 
  -9   3   8    9.17    1.22 
  -9  -3  -8    9.56    1.31 
   9  -3   8    7.16    0.86 
  -9   3  -8   10.35    1.66 
  -9   3  -8   10.98    1.05 
   9  -3  -8    7.78    0.93 
 -10   3   8    7.43    1.35 
  10   3  -8    5.87    0.93 
  10   3  -8    5.56    0.99 
 -10  -3  -8    3.97    1.00 
 -10   3  -8    5.05    1.17 
  10  -3  -8    2.96    0.69 
 -10   3  -8    2.94    1.01 
 -11  -3  -8    3.89    1.04 
  11   3  -8    3.65    0.82 
  11   3  -8    1.82    0.65 
  11  -3  -8    2.32    1.00 
  11   3   8    1.77    0.73 
 -11   3  -8    2.13    1.16 
   0   4   8    0.15    0.25 
   0  -4  -8    0.27    0.22 
   0   4  -8    0.46    0.33 
   0  -4  -8    0.16    0.36 
   0   4   8    0.27    0.24 
  -1   4   8   13.20    0.71 
  -1  -4  -8   12.66    0.81 
  -1   4   8   12.76    0.80 
   1   4  -8   12.82    0.65 
   1   4   8   12.75    0.82 
   1   4   8   13.23    0.63 
  -1   4  -8   13.51    0.60 
   1  -4  -8   12.15    0.66 
  -1   4  -8   13.16    0.77 
   1  -4  -8   12.35    0.75 
  -2  -4  -8   36.16    1.53 
   2   4  -8   34.49    1.23 
  -2   4   8   37.17    1.47 
   2   4  -8   35.27    1.32 
  -2   4  -8   37.28    1.27 
   2   4   8   36.72    1.52 
  -2   4  -8   35.61    1.48 
   2  -4  -8   35.69    1.40 
  -2   4  -8   38.08    1.34 
   2  -4  -8   35.59    1.36 
  -3   4   8   12.91    0.91 
   3   4  -8   12.70    0.71 
   3  -4  -8   13.42    0.76 
   3   4   8   13.35    0.96 
  -3   4  -8   14.29    0.69 
   3  -4  -8   13.45    0.78 
  -3   4  -8   13.73    0.96 
  -3   4  -8   13.66    0.73 
  -4  -4  -8    5.02    0.75 
   4   4  -8    4.34    0.50 
  -4   4   8    4.37    0.63 
  -4   4  -8    4.78    0.77 
   4   4   8    4.35    0.81 
  -4   4  -8    4.48    0.63 
   4  -4  -8    4.18    0.54 
  -4   4  -8    4.58    0.47 
  -5  -4  -8   19.99    1.22 
  -5   4   8   22.59    1.29 
   5   4  -8   19.27    1.10 
  -5   4  -8   20.37    1.07 
  -5   4  -8   19.42    0.87 
  -5   4  -8   20.83    1.21 
   5  -4  -8   19.86    1.02 
   5   4   8   21.90    1.18 
   6  -4   8    4.21    0.49 
  -6  -4  -8    6.18    0.84 
  -6   4   8    5.67    0.92 
   6   4  -8    5.06    0.61 
  -6   4  -8    4.33    0.46 
  -6   4  -8    5.55    0.80 
   6   4   8    4.60    0.79 
   7  -4   8   41.87    1.49 
  -7   4   8   43.56    1.94 
   7   4  -8   41.91    1.66 
  -7  -4  -8   42.36    2.44 
   7   4   8   41.86    1.87 
  -7   4  -8   41.53    1.96 
   8  -4   8    0.58    0.33 
   8   4  -8    0.12    0.37 
  -8  -4  -8    1.14    0.81 
   8   4  -8    0.45    0.30 
  -8   4  -8    0.98    0.69 
  -8   4  -8    1.69    0.50 
   9   4  -8    4.30    0.59 
  -9   4   8    3.63    0.82 
   9  -4  -8    3.19    0.67 
  -9   4  -8    4.20    0.95 
  -9   4  -8    6.36    0.98 
 -10   4   8    0.43    0.72 
  10   4  -8    0.14    0.47 
  10   4  -8   -0.38    0.55 
 -10  -4  -8    0.56    0.79 
 -10   4  -8    2.20    0.64 
 -10   4  -8    0.88    0.91 
  10  -4  -8   -0.12    0.54 
  11   4  -8    2.46    0.84 
 -11   4   8    3.13    1.02 
 -11  -4  -8    3.01    1.03 
  11   4  -8    2.67    0.68 
  11  -4  -8    3.34    0.81 
 -11   4  -8    4.07    0.85 
   0   5   8   26.86    1.26 
   0  -5  -8   27.19    1.08 
   0  -5  -8   27.95    1.23 
   0   5  -8   27.28    1.14 
   0   5   8   27.64    1.10 
  -1  -5  -8    8.82    0.75 
   1   5  -8    9.12    0.59 
  -1   5   8    9.80    0.77 
  -1  -5  -8    9.18    0.56 
  -1   5   8    9.78    0.66 
   1   5   8    9.54    0.79 
   1  -5  -8    9.00    0.58 
   1   5   8    9.20    0.59 
  -1   5  -8    8.90    0.70 
  -1   5  -8    9.36    0.54 
   1  -5  -8    8.60    0.69 
   2   5  -8   15.61    0.75 
   2   5  -8   15.63    0.73 
  -2   5   8   15.75    0.93 
  -2   5  -8   16.72    0.97 
  -2   5  -8   15.91    0.76 
   2  -5  -8   15.39    0.90 
   2  -5  -8   16.16    0.81 
  -2   5  -8   17.22    0.78 
   3   5  -8   95.12    3.09 
  -3   5   8   93.03    3.25 
  -3  -5  -8   96.84    3.32 
   3   5  -8   94.95    3.09 
   3   5  -8   97.57    3.08 
  -3   5  -8   97.00    3.09 
   3   5   8   99.50    3.33 
  -3   5  -8   99.74    3.00 
  -3   5  -8   93.59    3.61 
  -4  -5  -8    7.94    0.82 
  -4   5   8    7.49    1.03 
   4   5  -8    7.60    0.58 
  -4   5  -8    8.30    0.49 
  -4   5  -8    8.69    0.82 
   4   5   8    9.41    0.84 
   4  -5  -8    7.94    0.67 
  -4   5  -8    8.75    0.75 
   5   5  -8    0.56    0.35 
  -5  -5  -8    0.98    0.58 
  -5   5   8    0.46    0.53 
   5   5   8    0.50    0.38 
  -5   5  -8    0.09    0.52 
   5  -5  -8    0.39    0.31 
  -5   5  -8    0.68    0.45 
   6   5  -8   10.51    0.74 
  -6   5   8   11.28    1.10 
  -6  -5  -8    9.75    0.95 
  -6   5  -8   10.17    0.98 
   6  -5  -8   10.91    0.78 
   6   5   8   10.50    0.95 
   7   5  -8    0.48    0.35 
  -7   5  -8    0.13    0.47 
   7   5   8   -0.25    0.45 
   8   5  -8    0.77    0.40 
  -8   5   8    0.49    0.64 
  -8  -5  -8    0.52    0.62 
   8   5  -8    0.58    0.39 
  -8   5  -8    0.99    0.69 
   8  -5  -8    0.84    0.45 
  -8   5  -8    0.98    0.52 
  -9  -5  -8    0.13    0.82 
  -9   5   8    0.78    0.68 
   9   5  -8    0.16    0.39 
   9   5  -8    0.33    0.45 
  -9   5  -8   -0.32    0.78 
   9  -5  -8   -0.47    0.47 
  -9   5  -8    0.74    0.55 
 -10  -5  -8    1.06    0.86 
 -10   5   8    0.68    0.76 
  10  -5  -8   -0.24    0.61 
 -10   5  -8    0.08    0.92 
 -10   5  -8    1.14    0.64 
   0  -6  -8    3.83    0.62 
   0  -6  -8    2.93    0.42 
   0   6   8    3.18    0.52 
  -1  -6  -8    1.99    0.32 
  -1   6   8    2.32    0.40 
  -1   6  -8    2.67    0.45 
   1  -6  -8    2.30    0.54 
   1  -6  -8    1.67    0.32 
   1   6   8    1.79    0.42 
   1   6   8    1.85    0.37 
  -2  -6  -8   51.23    2.05 
   2   6  -8   53.22    1.79 
  -2   6   8   51.21    1.97 
  -2   6  -8   52.48    1.77 
  -2   6  -8   53.15    1.85 
   2  -6  -8   52.09    2.00 
   2   6   8   53.42    2.07 
   2  -6  -8   52.74    1.87 
  -3   6   8   44.29    2.40 
   3   6  -8   40.60    1.50 
   3   6  -8   41.76    1.43 
  -3  -6  -8   39.76    1.75 
  -3   6  -8   41.83    1.77 
   3   6   8   42.00    1.79 
  -3   6  -8   42.29    1.40 
  -3   6  -8   41.95    1.59 
   3  -6  -8   43.16    1.61 
   4   6  -8    4.19    0.53 
  -4   6   8    7.20    0.95 
  -4  -6  -8    5.46    0.79 
   4   6   8    5.99    0.81 
  -4   6  -8    6.00    0.78 
  -4   6  -8    6.32    0.83 
   4  -6  -8    6.28    0.62 
   5   6  -8    0.75    0.37 
  -5   6   8    0.76    0.54 
  -5  -6  -8    0.48    0.61 
  -5   6  -8    0.36    0.47 
   5   6   8    0.20    0.37 
  -5   6  -8    0.42    0.54 
   5  -6  -8    0.22    0.33 
  -6   6   8    5.42    1.00 
   6   6  -8    6.15    0.64 
   6   6  -8    5.30    0.61 
  -6  -6  -8    5.47    0.87 
  -6   6  -8    6.08    1.01 
   6  -6  -8    6.34    0.65 
   6   6   8    6.23    0.87 
   7   6  -8    4.97    0.64 
  -7   6  -8    4.05    0.63 
   7  -6  -8    3.65    0.63 
  -8   6   8   11.42    1.50 
   8   6  -8   11.09    0.86 
  -8  -6  -8   13.31    1.23 
   8   6  -8   14.21    1.03 
   8  -6  -8   12.25    1.27 
  -8   6  -8   11.60    1.15 
  -8   6  -8   12.97    1.45 
   9   6  -8   -0.30    0.40 
  -9  -6  -8    0.96    0.83 
  -9   6   8    0.76    0.70 
   9   6  -8   -0.85    0.44 
  -9   6  -8    0.76    0.58 
   9  -6  -8    0.02    0.54 
  -9   6  -8    0.11    0.81 
  10   6  -8    1.15    0.67 
 -10   6   8    1.10    0.85 
  10   6  -8    0.96    0.56 
 -10  -6  -8    1.41    0.91 
  10  -6  -8    0.19    0.64 
 -10   6  -8    0.20    0.94 
   0   7   8   79.44    2.69 
   0   7   8   80.20    2.82 
   0  -7  -8   77.01    2.57 
   0  -7  -8   77.89    2.82 
  -1  -7  -8    6.99    0.77 
  -1   7   8    7.13    0.78 
  -1   7   8    8.63    0.83 
  -1  -7  -8    7.03    0.71 
   1   7   8    8.38    1.06 
   1   7   8    7.59    0.79 
  -1   7  -8    7.61    0.65 
   1  -7  -8    7.25    0.65 
   1  -7  -8    7.72    0.79 
  -2   7   8   18.07    1.09 
   2   7  -8   18.87    0.83 
  -2  -7  -8   17.73    1.10 
  -2  -7  -8   18.34    0.85 
  -2   7   8   19.85    1.16 
  -2   7  -8   18.33    0.83 
   2  -7  -8   19.58    0.96 
  -2   7  -8   19.18    0.97 
   2  -7  -8   19.46    1.12 
   2   7   8   18.84    0.99 
   2   7   8   19.55    1.14 
  -3   7   8    9.04    0.96 
  -3  -7  -8    8.36    0.85 
   3   7  -8    9.84    0.88 
   3   7  -8    8.63    0.60 
   3   7   8    9.47    0.90 
   3  -7  -8    9.36    0.72 
  -3   7  -8    9.35    0.82 
   4   7  -8   14.93    0.76 
  -4   7   8   14.20    1.11 
   4   7  -8   15.48    0.70 
  -4  -7  -8   13.78    1.02 
   4   7  -8   15.50    0.84 
  -4   7  -8   13.90    0.97 
  -4   7  -8   13.88    1.03 
   4   7   8   12.47    1.04 
   4  -7  -8   13.83    0.86 
  -5  -7  -8    0.19    0.48 
   5   7  -8    0.26    0.24 
  -5   7   8   -0.31    0.48 
   5   7  -8    0.23    0.32 
   5   7   8   -0.11    0.34 
   5  -7  -8   -0.31    0.30 
  -5   7  -8   -0.28    0.50 
  -6   7   8    2.59    0.64 
   6   7  -8    4.12    0.61 
  -6   7  -8    3.50    0.63 
  -7   7   8    0.23    0.65 
   7   7  -8    1.21    0.36 
  -7  -7  -8    1.54    0.72 
   7   7  -8    0.81    0.37 
  -7   7  -8    0.58    0.51 
   7  -7  -8    1.37    0.46 
   7   7   8    1.14    0.51 
   8   7  -8    0.39    0.39 
  -8   7   8   -0.42    0.71 
   8   7  -8    0.58    0.40 
  -8   7  -8    0.34    0.74 
  -8   7  -8   -0.29    0.51 
   8  -7  -8    0.39    0.52 
  -9   7   8    0.31    0.75 
  -9  -7  -8    0.75    0.83 
   9   7  -8    0.59    0.45 
   9   7  -8    0.64    0.48 
  -9   7  -8    0.71    0.64 
   9  -7  -8    0.85    0.58 
  -9   7  -8    0.16    0.86 
  10   7  -8    6.60    0.93 
  10   7  -8    4.08    0.85 
 -10   7  -8    4.23    0.87 
  10  -7  -8    5.22    1.59 
   0   8   8   75.07    2.59 
   0  -8  -8   69.74    2.64 
   0   8  -8   69.62    2.34 
   0   8   8   72.18    2.65 
   0  -8  -8   71.51    2.38 
  -1   8   8    0.76    0.40 
  -1  -8  -8    0.54    0.29 
  -1   8   8    1.05    0.59 
  -1  -8  -8    0.77    0.49 
   1   8  -8    0.74    0.23 
   1  -8  -8    0.41    0.52 
  -1   8  -8    0.53    0.19 
  -1   8  -8    0.41    0.35 
   1   8   8    1.11    0.44 
   1   8   8    0.89    0.38 
   1  -8  -8    0.76    0.33 
  -2   8   8    2.97    0.60 
   2   8  -8    2.23    0.34 
  -2  -8  -8    2.41    0.62 
  -2  -8  -8    2.10    0.35 
  -2   8   8    2.24    0.47 
   2   8  -8    2.04    0.37 
  -2   8  -8    3.15    0.49 
   2  -8  -8    2.96    0.62 
   2   8   8    1.97    0.48 
  -2   8  -8    2.39    0.32 
  -2   8  -8    2.33    0.30 
   2   8   8    2.09    0.45 
   3   8  -8    0.89    0.28 
   3   8  -8    1.32    0.28 
  -3   8   8    1.22    0.50 
   3  -8  -8    1.77    0.39 
  -3   8  -8    0.95    0.47 
   3   8   8    0.61    0.41 
  -4  -8  -8    8.81    0.90 
   4   8  -8    8.29    0.61 
   4   8  -8    8.27    0.67 
  -4   8   8    9.38    1.03 
   4  -8  -8    8.67    0.72 
   5   8  -8    6.11    0.58 
  -5   8   8    5.82    0.98 
   5   8  -8    6.95    0.67 
   5  -8  -8    5.31    0.69 
  -5   8  -8    6.40    0.84 
  -5   8  -8    6.43    0.91 
   6   8  -8    9.96    0.84 
  -6  -8  -8    8.78    1.19 
   6   8  -8    8.32    0.78 
   6   8   8    8.59    1.08 
  -6   8  -8    7.81    1.00 
   7   8  -8   14.24    1.53 
  -7   8   8   11.44    1.36 
   7   8  -8   11.79    0.93 
  -7  -8  -8   10.57    1.18 
   7  -8  -8   10.01    0.97 
  -7   8  -8   11.07    1.12 
  -7   8  -8   11.07    1.37 
   8   8  -8    5.43    0.74 
  -8  -8  -8    7.69    1.21 
  -8   8   8    4.91    0.96 
   8   8  -8    7.48    0.94 
  -8   8  -8    6.62    1.17 
  -8   8  -8    7.46    1.07 
   8  -8  -8    6.22    0.95 
  -9   8   8    5.39    1.05 
   9   8  -8    5.01    0.74 
   9   8  -8    3.35    0.68 
   9  -8  -8    4.67    0.80 
  -9   8  -8    6.51    1.20 
  10   8  -8   -1.06    0.53 
  10  -8  -8   -0.45    0.85 
   0   9   8   39.06    1.74 
   0  -9  -8   39.41    1.78 
   0   9   8   39.76    1.70 
   0   9  -8   38.36    1.81 
   0   9  -8   37.87    1.43 
   0  -9  -8   38.41    1.45 
   1   9  -8   29.45    1.21 
  -1   9   8   28.75    1.44 
  -1  -9  -8   30.18    1.49 
  -1   9   8   27.99    1.46 
   1   9  -8   29.14    1.11 
  -1  -9  -8   28.16    1.14 
  -1   9  -8   29.53    1.13 
   1   9   8   29.36    1.44 
   1   9   8   29.57    1.47 
   1  -9  -8   26.36    1.20 
   1  -9  -8   27.97    1.47 
   2   9  -8    1.62    0.30 
   2   9  -8    1.40    0.31 
  -2   9   8    1.09    0.52 
  -2   9   8    1.33    0.42 
  -2  -9  -8    1.45    0.32 
  -2   9  -8    1.52    0.25 
   2   9   8    0.97    0.48 
  -2   9  -8    1.08    0.31 
   2  -9  -8    1.69    0.41 
   2   9   8    1.07    0.41 
  -3   9   8    1.71    0.57 
  -3  -9  -8    2.58    0.37 
   3   9  -8    2.01    0.33 
   3   9  -8    2.01    0.33 
   3   9   8    1.89    0.47 
  -3   9  -8    2.24    0.54 
   3  -9  -8    2.00    0.41 
   4   9  -8    7.97    0.67 
   4   9  -8    6.86    0.57 
  -4   9   8    6.78    1.09 
   4  -9  -8    6.97    0.69 
  -4   9  -8    7.39    0.92 
   5   9  -8    3.01    0.47 
  -5  -9  -8    3.37    0.98 
   5   9  -8    3.15    0.40 
   5  -9  -8    3.56    0.54 
  -5   9  -8    3.19    0.63 
   6   9  -8    0.49    0.33 
   6   9  -8    0.21    0.38 
  -6  -9  -8    0.57    0.64 
  -6   9   8   -0.18    0.61 
   6  -9  -8   -0.18    0.41 
  -6   9  -8    0.74    0.72 
  -6   9  -8   -0.22    0.56 
   6   9   8    0.06    0.56 
  -7  -9  -8    0.71    0.87 
   7   9  -8    1.37    0.43 
   7   9  -8    0.96    0.43 
  -7   9   8    0.95    0.74 
   7   9   8    0.07    0.55 
  -7   9  -8    0.81    0.76 
  -7   9  -8    1.96    0.77 
  -8   9   8    0.23    0.82 
   8   9  -8    0.03    0.43 
  -8  -9  -8    1.52    0.89 
   8   9  -8    1.33    0.45 
  -8   9  -8   -0.14    0.62 
   8  -9  -8   -0.01    0.57 
   8   9   8    1.05    0.68 
  -8   9  -8    0.43    0.76 
   9   9  -8    0.01    0.49 
  -9  -9  -8    0.41    0.94 
  -9   9   8    0.61    0.98 
  -9   9  -8   -0.63    0.68 
   9  -9  -8    0.61    0.67 
   0 -10  -8    7.38    0.64 
   0  10  -8    7.43    0.59 
   0  10  -8    7.52    0.80 
   0  10   8    8.00    0.90 
   0  10   8    7.90    0.90 
   0 -10  -8    9.25    0.94 
   1  10  -8    2.19    0.33 
  -1 -10  -8    2.35    0.39 
  -1  10   8    1.31    0.51 
  -1  10   8    2.07    0.47 
   1  10   8    1.91    0.52 
  -1  10  -8    1.53    0.29 
   1 -10  -8    2.18    0.43 
   1  10   8    1.54    0.54 
  -1  10  -8    1.99    0.49 
   1 -10  -8    1.94    0.66 
  -2  10   8    1.13    0.43 
  -2  10   8    1.09    0.52 
  -2 -10  -8    1.66    0.35 
   2  10  -8    2.00    0.34 
   2  10  -8    1.57    0.36 
   2  10   8    1.10    0.44 
   2  10   8    1.51    0.49 
   2 -10  -8    1.87    0.43 
  -2  10  -8    1.72    0.28 
  -2  10  -8    1.19    0.46 
   3  10  -8   15.74    0.90 
  -3  10   8   13.24    1.18 
   3  10  -8   13.48    0.70 
  -3 -10  -8   13.32    0.75 
   3 -10  -8   14.25    0.88 
  -3  10  -8   14.42    1.07 
   3  10   8   13.49    1.15 
  -4 -10  -8    8.45    1.15 
   4  10  -8    7.31    0.85 
  -4 -10  -8    8.00    0.67 
   4  10  -8    7.62    0.57 
   4  10   8    5.74    1.03 
   4 -10  -8    7.59    0.78 
  -4  10  -8    5.86    0.94 
  -5  10   8   10.73    1.34 
  -5 -10  -8   12.35    1.15 
   5  10  -8    9.93    0.65 
   5  10  -8   10.15    0.88 
   5  10   8    7.58    1.25 
  -5  10  -8   11.46    1.14 
   6  10  -8    0.76    0.69 
   6  10  -8    1.74    0.37 
  -6 -10  -8    1.48    1.38 
   6  10   8    1.50    0.63 
   6 -10  -8    1.52    0.51 
  -6  10  -8    1.12    0.69 
   7  10  -8    0.83    0.52 
   7  10  -8    0.54    0.42 
  -7  10   8    0.37    0.77 
  -7 -10  -8    0.22    0.93 
  -7  10  -8    0.23    0.77 
   7 -10  -8    0.55    0.55 
   7  10   8   -0.22    0.59 
  -7  10  -8   -0.42    0.64 
  -8  10   8    0.17    0.84 
  -8 -10  -8    0.84    0.89 
   8  10  -8    0.72    0.51 
   8  10   8    0.98    0.72 
  -8  10  -8    0.95    0.85 
   8 -10  -8    0.04    0.59 
  -9 -10  -8    1.80    1.05 
   9  10  -8    1.25    0.60 
   9 -10  -8    2.12    1.45 
   9  10   8    1.75    1.01 
   0  11  -8    7.15    0.69 
   0  11   8    6.09    0.98 
   0  11   8    8.01    0.94 
   0 -11  -8    6.94    0.94 
   0  11  -8    6.86    0.91 
   0 -11  -8    8.28    0.64 
  -1  11   8    9.09    0.94 
  -1  11   8    6.97    1.03 
   1  11  -8    7.98    0.58 
  -1 -11  -8    7.48    0.64 
   1  11  -8    7.58    0.69 
   1  11   8    7.02    0.92 
  -1  11  -8    7.52    0.65 
   1  11   8    7.31    0.99 
   1 -11  -8    7.33    1.08 
  -1  11  -8    7.73    0.87 
  -2  11   8    5.46    0.84 
  -2  11   8    6.28    0.90 
   2  11  -8    5.69    0.52 
  -2 -11  -8    5.46    0.60 
   2  11  -8    7.43    0.66 
   2  11   8    5.48    0.90 
  -2  11  -8    5.08    0.68 
   2 -11  -8    6.11    0.68 
   2  11   8    6.97    0.91 
  -2  11  -8    5.12    0.53 
   3  11  -8    1.79    0.33 
   3  11  -8    1.86    0.38 
  -3 -11  -8    2.40    0.89 
  -3 -11  -8    1.87    0.37 
   3  11   8    1.78    0.55 
   3 -11  -8    1.84    0.42 
   3  11   8    2.33    0.50 
  -3  11  -8    1.59    0.54 
   4  11  -8    8.34    0.60 
  -4  11   8   10.37    1.35 
   4  11  -8    7.47    0.82 
  -4 -11  -8    9.39    1.13 
  -4 -11  -8    9.01    0.70 
   4 -11  -8   11.12    0.85 
   4  11   8   10.65    1.22 
  -4  11  -8    9.59    1.09 
  -5  11   8    0.52    1.42 
  -5 -11  -8    0.65    0.41 
  -5 -11  -8    0.94    0.79 
   5  11  -8    0.06    0.46 
   5  11   8    0.44    0.56 
  -5  11  -8   -0.20    0.58 
   6  11  -8    2.78    0.51 
  -6  11   8    2.30    0.84 
  -6 -11  -8    3.20    0.95 
   6 -11  -8    3.68    0.65 
  -6  11  -8    1.90    0.82 
   6  11   8    1.04    0.62 
  -7 -11  -8    1.18    0.93 
   7  11  -8    0.49    0.46 
  -7  11   8    1.15    0.91 
  -7  11  -8    1.09    0.78 
   7 -11  -8    1.63    0.60 
   7  11   8    0.70    0.67 
   8  11   8   -0.01    0.85 
   8 -11  -8    0.84    0.67 
  -8  11  -8   -1.69    1.66 
  -8  11  -8   -0.03    1.08 
   0  12   8    0.25    0.49 
   0  12  -8   -0.04    0.37 
   0 -12  -8   -0.35    0.34 
   0 -12  -8   -0.98    0.57 
   0  12  -8   -0.07    0.49 
   1  12  -8    5.29    0.68 
  -1 -12  -8    4.32    0.49 
  -1  12   8    5.87    0.93 
   1  12  -8    4.25    0.51 
   1  12   8    3.49    0.61 
  -1  12  -8    4.37    0.69 
  -1  12  -8    2.83    0.42 
  -2  12   8    0.73    0.74 
  -2 -12  -8    1.03    0.36 
  -2  12   8    0.74    0.48 
   2  12  -8    0.58    0.28 
   2  12  -8    0.61    0.34 
   2 -12  -8    1.19    0.48 
   2  12   8    0.58    0.46 
  -2  12  -8    1.01    0.56 
  -3  12   8    0.69    0.73 
   3  12  -8    0.80    0.36 
  -3 -12  -8    1.36    0.38 
  -3 -12  -8    0.42    1.23 
   3  12   8    0.30    0.79 
   3 -12  -8    1.22    0.42 
  -3  12  -8    0.59    0.56 
  -4 -12  -8    1.82    0.80 
   4  12  -8    0.82    0.39 
   4  12   8    0.02    0.55 
   4 -12  -8    0.65    0.43 
  -4  12  -8    0.39    0.62 
  -5 -12  -8   -0.04    0.73 
   5  12  -8    0.18    0.41 
  -5  12   8   -1.10    0.91 
   5  12   8    0.00    0.58 
   5 -12  -8    0.79    0.50 
  -5  12  -8   -2.28    1.19 
  -6  12   8    1.02    0.85 
   6 -12  -8    1.76    0.73 
   6  12   8    0.85    0.66 
  -7 -12  -8    1.39    0.94 
   7  12  -8    0.26    0.52 
  -7  12   8   -0.52    0.90 
  -7  12  -8   -1.26    0.81 
   7 -12  -8   -0.20    0.60 
   0  13  -8   -0.06    0.56 
   0  13   8    0.07    0.67 
   0  13   8   -0.54    0.47 
   0  13  -8   -0.37    0.49 
   0 -13  -8    0.57    0.38 
  -1  13   8    1.36    0.77 
   1  13  -8    2.08    0.46 
  -1  13   8    2.27    0.55 
  -1 -13  -8    1.84    0.41 
  -1 -13  -8    2.46    0.82 
   1 -13  -8    3.88    0.82 
  -1  13  -8    1.89    0.42 
   1  13   8    1.16    0.75 
  -1  13  -8    1.87    0.65 
   2  13  -8    1.13    0.41 
  -2 -13  -8    2.51    0.88 
  -2  13   8   -0.51    1.52 
  -2  13   8    0.57    0.50 
  -2  13  -8    1.36    0.60 
   2  13   8    1.05    0.72 
   2 -13  -8    0.77    0.41 
   2  13   8    0.62    0.73 
   3  13  -8    2.32    0.53 
  -3  13   8    3.72    0.98 
  -3 -13  -8    3.20    0.94 
   3 -13  -8    3.28    0.53 
   3  13   8    3.41    0.89 
  -3  13  -8    1.90    0.70 
   3  13   8    3.02    0.68 
   4  13  -8    0.52    0.53 
  -4  13   8   -0.73    0.92 
  -4 -13  -8    0.76    0.87 
   4  13   8   -0.30    0.57 
  -4  13  -8    0.25    0.73 
  -5  13   8   -1.70    0.86 
   5  13  -8    0.34    0.46 
  -5 -13  -8    1.98    0.92 
   5  13   8   -0.99    0.60 
   5 -13  -8   -0.16    0.51 
  -5  13  -8   -1.14    0.84 
  -6 -13  -8    1.54    0.98 
   6  13  -8    0.83    0.53 
  -6  13   8    0.11    0.92 
   6 -13  -8    1.13    0.71 
  -6  13  -8   -1.75    1.03 
   6  13   8   -0.34    1.39 
   0  14  -8   -0.19    0.41 
   0  14  -8   -0.66    1.45 
   0  14   8   -1.00    0.76 
  -1  14   8    0.85    0.55 
   1  14  -8    0.97    0.74 
  -1  14   8    0.17    0.86 
   1  14  -8    0.09    0.41 
   1  14   8    0.05    0.54 
   1  14   8   -0.69    0.81 
   2  14  -8    2.00    0.51 
  -2  14   8    1.05    0.56 
  -2 -14  -8    2.29    0.91 
  -2  14   8    1.60    0.98 
   2 -14  -8    0.66    0.45 
  -2  14  -8    2.31    1.31 
   2  14   8    1.91    0.91 
  -3 -14  -8    0.36    0.94 
   3  14  -8   -0.37    0.47 
  -3  14   8    1.17    1.09 
   3  14   8    1.66    0.90 
   3  14   8    0.73    0.62 
   3 -14  -8    0.17    0.46 
  -3  14  -8    0.32    1.04 
  -4 -14  -8    3.67    1.10 
  -4  14   8    0.83    1.03 
   4  14  -8    0.91    0.53 
   4  14   8    2.14    0.73 
  -4  14  -8    1.78    0.91 
   4  14   8    2.43    0.73 
  -5 -14  -8    2.62    1.31 
   5  14  -8    0.99    0.54 
  -5  14   8    0.16    1.11 
  -5  14  -8   -0.09    1.00 
   5  14   8    1.25    1.24 
   5 -14  -8    2.07    0.74 
   0  15  -8    1.25    0.88 
   0  15   8    0.79    0.63 
   0  15   8    0.82    0.97 
  -1  15   8   -0.22    1.01 
   1  15  -8   -0.06    0.46 
   1  15  -8    0.74    0.94 
  -1  15   8   -0.16    0.61 
  -1  15  -8   -0.52    0.79 
   1  15   8    1.87    1.04 
   1  15   8    0.00    0.63 
  -2  15   8    2.89    1.14 
  -2  15   8    2.97    1.18 
   2  15  -8    1.37    0.53 
  -2  15  -8    1.94    0.88 
   2  15   8    3.39    1.14 
   2  15   8    1.03    0.66 
  -3  15   8    2.42    1.21 
  -3  15  -8    1.76    0.96 
   3  15   8    3.33    1.09 
   4  15  -8    1.11    0.64 
  -4 -15  -8    3.79    1.28 
   4 -15  -8    1.77    0.85 
   4  15   8    0.35    1.05 
   4  15   8    1.03    1.36 
  -4  15  -8    0.31    0.99 
   0  16  -8    0.26    0.90 
   0  16   8   -1.09    1.26 
   0  16   8    0.93    0.70 
  -1  16   8   -1.67    1.79 
  -1  16   8    0.71    0.69 
   1  16  -8   -0.34    0.99 
   1  16   8   -1.01    1.21 
   1  16   8   -0.87    0.63 
  -1  16  -8   -1.47    0.89 
   0   0  -9    0.47    0.35 
   1   0  -9   -0.10    0.28 
   1   0  -9    0.12    0.21 
  -1   0  -9    0.10    0.34 
   1   0  -9   -0.24    0.19 
   2   0  -9    3.31    0.39 
  -2   0   9    2.92    0.46 
  -2   0   9    3.00    0.43 
  -2   0  -9    3.11    0.52 
   2   0  -9    3.17    0.39 
   2   0   9    3.09    0.51 
   2   0  -9    3.16    0.46 
  -3   0   9    9.63    0.55 
   3   0  -9    9.12    0.50 
   3   0   9    9.19    0.69 
  -3   0   9    9.60    0.67 
   3   0  -9    9.49    0.67 
  -3   0  -9    9.63    0.81 
   4   0   9    2.20    0.33 
   4   0  -9    1.84    0.38 
   4   0   9    1.52    0.35 
  -4   0   9    1.95    0.43 
  -4   0  -9    2.12    0.61 
  -5   0   9   11.82    0.96 
   5   0  -9   11.65    0.78 
   5   0   9   11.55    0.89 
  -5   0  -9   12.09    1.01 
   6   0   9    0.26    0.38 
   6   0  -9    0.31    0.36 
  -6   0   9   -0.17    0.42 
   7   0   9    8.82    0.91 
   7   0  -9    8.14    0.75 
  -7   0   9    7.83    0.93 
  -8   0  -9   18.80    1.33 
   8   0   9   18.21    1.17 
   8   0  -9   17.87    1.16 
   9   0   9    0.01    0.43 
  -9   0  -9   -0.16    0.70 
   9   0  -9    0.54    0.59 
 -10   0   9    3.40    0.88 
 -10   0  -9    4.29    1.07 
  10   0  -9    2.80    0.66 
  11   0   9   -0.67    0.71 
  11   0  -9    1.74    0.58 
 -11   0  -9    0.42    1.01 
  11   0  -9    0.41    0.85 
   0   1  -9   63.75    2.21 
   0  -1  -9   66.62    2.23 
  -1   1   9   18.71    0.75 
   1   1  -9   19.68    0.76 
   1   1  -9   18.60    0.82 
  -1  -1  -9   18.35    0.94 
   1   1  -9   18.38    0.97 
   1  -1  -9   18.34    0.86 
   1  -1  -9   18.67    0.85 
  -1   1  -9   18.57    0.93 
   1   1   9   18.53    0.94 
   1  -1  -9   19.03    0.73 
  -1  -1   9   20.05    0.94 
  -2   1   9   16.35    0.86 
   2  -1   9   13.74    0.76 
  -2  -1  -9   12.94    0.85 
   2   1  -9   13.97    0.78 
  -2   1   9   12.74    0.73 
   2   1  -9   13.88    0.73 
   2   1  -9   13.18    0.63 
   2  -1  -9   12.99    0.67 
   2   1   9   13.43    0.81 
   2  -1  -9   14.23    0.74 
  -2   1  -9   12.99    0.84 
   2  -1  -9   13.99    0.74 
  -2  -1   9   14.59    0.66 
   3  -1   9    9.42    0.66 
   3   1  -9    9.96    0.47 
  -3   1   9   10.83    0.62 
   3   1  -9    9.70    0.66 
  -3   1   9    9.45    0.70 
  -3  -1  -9    9.31    0.84 
  -3  -1   9    9.62    0.65 
   3   1   9    9.13    0.72 
   3  -1  -9    9.84    1.00 
   3  -1  -9    9.23    0.54 
  -3   1  -9    9.23    0.83 
  -4   1   9    0.65    0.33 
  -4  -1  -9    0.60    0.53 
   4  -1   9   -0.19    0.25 
  -4   1   9   -0.20    0.36 
   4   1  -9    0.58    0.31 
   4  -1   9   -0.33    0.26 
  -4   1  -9   -0.01    0.22 
  -4   1  -9    0.19    0.53 
  -4  -1   9   -0.18    0.32 
   4   1   9   -0.28    0.31 
   4   1   9    0.16    0.31 
   4  -1  -9    0.47    0.32 
   5  -1   9    0.81    0.34 
  -5   1   9    0.74    0.53 
   5   1  -9    1.69    0.38 
  -5  -1  -9    1.34    0.59 
   5  -1  -9    1.37    0.36 
  -5   1  -9    1.25    0.33 
  -5  -1   9    1.15    0.46 
  -5   1  -9    2.40    0.65 
   5   1   9    1.06    0.42 
   6  -1   9    5.42    0.68 
  -6   1   9    4.23    0.63 
  -6  -1  -9    4.89    0.91 
   6   1  -9    5.44    0.63 
  -6  -1   9    3.54    0.57 
  -6   1  -9    3.86    0.67 
   6  -1  -9    3.59    0.51 
   6   1   9    3.53    0.54 
  -7   1   9    5.69    0.86 
   7  -1   9    6.43    0.81 
   7   1  -9    6.23    0.69 
  -7   1  -9    7.66    0.83 
   7   1   9    5.88    0.83 
  -7  -1   9    5.04    0.81 
   7  -1  -9    5.49    0.68 
   8   1  -9    4.34    0.67 
  -8  -1  -9    4.80    0.88 
   8  -1   9    3.31    0.59 
   8  -1  -9    4.69    0.74 
  -8   1  -9    4.69    0.87 
   8   1   9    4.68    0.81 
   9  -1   9    9.45    0.99 
  -9  -1  -9   10.28    1.40 
   9  -1  -9   10.41    0.98 
  -9   1  -9   10.44    1.25 
   9   1   9   10.32    1.05 
 -10   1   9   11.36    1.49 
 -10  -1  -9    8.46    1.30 
 -10  -1   9   12.36    1.65 
 -10   1  -9    8.13    1.44 
  10  -1  -9    8.09    1.05 
 -11  -1  -9    0.88    0.97 
  11   1  -9    0.41    0.55 
  11   1  -9   -0.54    0.64 
  11  -1  -9    0.70    0.56 
 -11   1  -9    1.12    1.19 
  11   1   9   -0.46    0.63 
   0  -2  -9    0.72    0.25 
   0  -2  -9    0.86    0.38 
   0   2   9    0.99    0.21 
   0   2  -9    0.82    0.36 
   0   2   9    0.70    0.29 
  -1  -2  -9   23.78    1.12 
   1   2  -9   23.29    0.99 
   1   2  -9   23.57    0.97 
   1   2  -9   26.10    0.93 
  -1   2   9   25.74    0.95 
   1  -2  -9   23.18    1.01 
   1  -2  -9   24.14    1.11 
  -1   2  -9   24.19    1.08 
   1  -2  -9   25.61    0.95 
   1   2   9   23.19    1.11 
   2   2  -9    7.42    0.47 
  -2  -2  -9    7.49    0.72 
   2   2  -9    7.15    0.53 
   2   2  -9    7.56    0.63 
  -2   2   9    7.45    0.60 
   2   2   9    8.25    0.67 
   2  -2  -9    7.38    0.53 
  -2   2  -9    6.96    0.70 
   2  -2  -9    8.36    0.59 
  -3   2   9   19.43    0.98 
   3   2  -9   20.10    0.93 
   3  -2   9   19.71    0.92 
   3   2   9   21.14    1.10 
  -3   2  -9   18.63    1.12 
   3  -2  -9   19.80    0.87 
   3   2   9   19.52    1.05 
  -3   2  -9   20.04    0.74 
  -4   2   9   58.78    2.19 
  -4  -2  -9   60.43    2.31 
   4   2  -9   54.13    2.49 
   4  -2   9   61.30    2.10 
   4  -2   9   61.90    1.98 
  -4   2   9   61.51    2.04 
   4   2   9   62.19    2.03 
  -4   2  -9   62.24    2.03 
  -4   2  -9   62.69    2.33 
   4   2   9   63.00    2.28 
   4  -2  -9   58.72    2.14 
   5   2  -9   29.57    1.27 
  -5  -2  -9   28.69    1.47 
  -5   2   9   29.49    1.18 
   5  -2   9   29.80    1.24 
   5  -2  -9   30.99    1.32 
  -5   2  -9   30.86    1.52 
   5   2   9   31.67    1.49 
  -5   2  -9   30.29    1.22 
  -6   2   9   15.02    1.13 
   6   2  -9   14.99    0.91 
  -6  -2  -9   14.05    1.03 
  -6   2   9   16.67    0.79 
   6  -2   9   14.05    0.87 
   6  -2  -9   13.24    0.90 
   6   2   9   16.19    1.07 
  -6   2  -9   15.56    0.92 
  -7   2   9    0.74    0.49 
   7   2  -9    0.88    0.35 
   7  -2   9    0.68    0.35 
   7  -2  -9    0.29    0.35 
  -7   2  -9    0.67    0.43 
   7   2   9   -0.09    0.38 
   8   2  -9    5.63    0.79 
   8  -2   9    5.63    0.85 
  -8  -2  -9    4.62    0.90 
   8   2   9    5.24    0.92 
  -8   2  -9    5.99    0.82 
   8  -2  -9    5.63    0.74 
  -8   2  -9    5.65    0.95 
  -9  -2  -9    2.09    0.80 
   9  -2   9    1.09    0.71 
  -9   2   9    3.11    0.91 
   9   2  -9    0.45    0.50 
   9  -2  -9    1.30    0.55 
  -9   2  -9    0.51    0.79 
  10   2  -9    0.11    0.43 
  10   2  -9    0.31    0.57 
 -10   2   9    1.40    0.75 
 -10  -2  -9    0.26    0.88 
 -10   2  -9    2.28    0.79 
  10   2   9   -0.75    0.56 
 -10   2  -9    0.48    0.87 
  10  -2  -9    0.73    0.58 
  11   2  -9    4.75    0.78 
 -11   2   9    3.44    1.15 
 -11  -2  -9    4.67    1.19 
  11  -2  -9    3.79    0.82 
   0   3   9   35.24    1.47 
   0   3  -9   35.33    1.17 
   0   3  -9   34.99    1.34 
   0   3   9   35.45    1.22 
   0  -3  -9   33.71    1.40 
   0  -3  -9   33.76    1.30 
   1   3  -9   38.11    1.38 
  -1   3   9   38.28    1.35 
   1   3  -9   38.96    1.32 
   1   3  -9   36.23    1.34 
  -1  -3  -9   37.53    1.52 
   1  -3  -9   36.70    1.37 
   1  -3  -9   36.05    1.39 
   1  -3  -9   37.63    1.45 
  -1   3  -9   37.13    1.47 
   1   3   9   38.15    1.25 
   1   3   9   36.67    1.53 
  -2   3   9   17.48    0.90 
  -2  -3  -9   17.28    1.02 
   2   3  -9   17.08    0.74 
   2   3  -9   18.30    0.83 
   2   3   9   17.89    1.01 
   2  -3  -9   17.10    0.85 
  -2   3  -9   17.87    0.99 
   2   3   9   18.02    0.70 
   2  -3  -9   16.77    0.85 
  -2   3  -9   17.43    0.68 
  -3  -3  -9   49.32    2.00 
  -3   3   9   49.85    1.87 
   3   3  -9   51.11    1.81 
   3  -3  -9   51.31    1.79 
  -3   3  -9   50.83    1.67 
   3   3   9   52.97    1.69 
   3  -3  -9   49.62    1.85 
   3   3   9   48.33    2.12 
  -4  -3  -9    2.86    0.64 
  -4   3   9    2.48    0.52 
   4   3  -9    2.63    0.72 
   4  -3  -9    2.49    0.41 
   4   3   9    4.35    0.73 
  -4   3  -9    3.32    0.67 
  -4   3  -9    3.24    0.52 
   5  -3   9   29.00    1.19 
  -5   3   9   28.72    1.49 
  -5  -3  -9   28.17    1.47 
   5   3  -9   29.89    1.28 
   5   3   9   31.13    1.47 
  -5   3  -9   30.26    1.31 
  -5   3  -9   31.77    1.54 
   5  -3  -9   30.95    1.33 
   6   3  -9    0.71    0.38 
  -6  -3  -9    1.11    0.55 
   6  -3   9    0.31    0.29 
  -6   3   9    0.70    0.49 
  -6   3  -9    1.11    0.43 
   6   3   9    0.17    0.38 
   7   3  -9    8.31    0.72 
   7  -3   9    6.23    0.68 
  -7   3   9    7.70    0.94 
   7   3   9    7.30    0.88 
  -7   3  -9    7.93    0.95 
   8  -3   9    3.50    0.49 
  -8   3   9    4.07    0.73 
  -8  -3  -9    3.77    0.87 
   8   3  -9    3.42    0.53 
  -8   3  -9    4.69    0.91 
   8   3   9    3.25    0.66 
   8  -3  -9    3.00    0.56 
  -9  -3  -9    0.35    0.77 
   9   3  -9    1.04    0.45 
  -9   3   9    1.64    0.69 
   9   3  -9    0.88    0.50 
   9  -3   9    0.68    0.44 
   9   3   9    0.59    0.53 
  -9   3  -9    2.10    0.72 
  -9   3  -9    1.29    0.85 
   9  -3  -9    1.62    0.55 
  10   3  -9   -0.88    0.56 
 -10   3   9    0.47    0.72 
 -10  -3  -9   -0.25    0.87 
  10   3  -9    0.17    0.47 
 -10   3  -9   -0.22    0.89 
  10  -3  -9   -0.57    0.57 
  11   3  -9    1.50    0.67 
  11   3  -9    1.18    0.62 
  11   3   9   -0.43    0.71 
  11  -3  -9   -0.64    0.69 
   0   4   9   24.78    0.98 
   0   4  -9   25.02    1.06 
   0  -4  -9   23.53    1.00 
   0  -4  -9   23.94    1.14 
   0   4   9   23.37    1.20 
  -1  -4  -9    4.32    0.65 
   1   4  -9    3.97    0.48 
  -1   4   9    4.08    0.72 
  -1   4   9    4.43    0.55 
   1   4   9    4.61    0.44 
   1  -4  -9    3.85    0.57 
   1   4   9    4.00    0.74 
  -1   4  -9    4.18    0.39 
   1  -4  -9    4.23    0.50 
  -1   4  -9    4.68    0.63 
   2   4  -9   26.61    1.09 
  -2   4   9   27.36    1.19 
   2   4  -9   26.20    1.05 
   2  -4  -9   25.26    1.23 
   2  -4  -9   25.74    1.17 
  -2   4  -9   27.14    1.00 
   2   4   9   27.03    1.01 
  -2   4  -9   26.44    1.28 
   3   4  -9   15.15    0.81 
  -3   4   9   14.75    1.06 
  -3  -4  -9   15.50    1.05 
   3  -4  -9   15.72    0.84 
   3   4   9   16.06    1.03 
  -3   4  -9   15.85    0.78 
   3   4   9   17.48    0.91 
  -3   4  -9   14.89    1.06 
   3  -4  -9   15.65    0.86 
  -4  -4  -9   11.00    0.93 
   4   4  -9   10.49    0.77 
  -4   4   9    9.96    1.02 
   4  -4  -9   11.42    0.75 
  -4   4  -9   10.75    0.95 
   4   4   9   11.44    0.91 
  -4   4  -9   10.65    0.77 
   5   4  -9   19.57    0.97 
  -5  -4  -9   19.11    1.22 
  -5   4   9   20.57    1.30 
  -5   4  -9   20.80    1.23 
  -5   4  -9   19.66    1.04 
   5   4   9   20.37    1.20 
   5  -4  -9   19.83    1.03 
  -6  -4  -9   16.90    1.16 
   6   4  -9   18.75    0.95 
  -6   4   9   17.94    1.20 
   6   4   9   16.44    1.15 
  -6   4  -9   18.06    1.05 
  -7   4   9   10.45    1.10 
   7   4  -9   10.34    0.77 
   7  -4   9   10.22    1.01 
   7   4   9   10.69    1.04 
   8  -4   9    5.84    0.66 
  -8  -4  -9    6.38    1.04 
   8   4  -9    7.35    0.79 
  -8   4   9    6.72    1.12 
  -8   4  -9    7.81    1.60 
  -8   4  -9    6.94    0.87 
   9   4  -9   -0.52    0.45 
  -9   4   9    1.05    0.70 
   9   4  -9    0.31    0.40 
  -9  -4  -9    1.23    0.78 
   9  -4  -9   -0.06    0.50 
   9   4   9   -0.13    0.57 
 -10   4   9    3.05    0.88 
  10   4  -9    1.83    0.61 
 -10  -4  -9    1.86    0.91 
  10   4  -9    1.64    0.60 
 -10   4  -9    1.31    0.69 
  10  -4  -9    1.68    0.62 
  10   4   9    0.43    0.70 
 -10   4  -9    0.62    0.95 
   0   5  -9    7.39    0.64 
   0  -5  -9    7.29    0.56 
   0   5   9    7.56    0.60 
   0   5   9    7.93    0.78 
   0  -5  -9    7.59    0.75 
   1   5  -9    0.35    0.36 
  -1   5   9    0.42    0.32 
  -1  -5  -9    0.59    0.26 
  -1   5   9    0.55    0.34 
  -1   5  -9    0.53    0.42 
  -1   5  -9    0.53    0.25 
   1   5   9    0.27    0.35 
   1  -5  -9    0.65    0.30 
   1   5   9    0.19    0.28 
   1  -5  -9    0.41    0.42 
   2   5  -9   19.38    0.85 
  -2   5   9   21.40    1.08 
   2   5  -9   19.92    0.89 
  -2  -5  -9   19.46    1.14 
  -2   5  -9   20.45    0.88 
   2  -5  -9   17.84    1.36 
   2   5   9   19.60    0.88 
   2   5   9   18.02    1.10 
   2  -5  -9   18.87    1.01 
  -2   5  -9   18.26    1.11 
   3   5  -9   33.48    1.32 
  -3   5   9   33.71    1.50 
  -3  -5  -9   33.75    1.56 
   3   5  -9   32.31    1.16 
   3   5   9   36.34    1.56 
  -3   5  -9   33.10    1.55 
   3  -5  -9   33.43    1.38 
  -3   5  -9   33.60    1.28 
  -3   5  -9   33.93    1.32 
   3  -5  -9   35.08    1.43 
  -4  -5  -9    3.14    0.66 
   4   5  -9    2.64    0.43 
  -4   5  -9    1.87    0.31 
  -4   5  -9    2.09    0.71 
  -4   5  -9    2.87    0.68 
   4  -5  -9    2.30    0.43 
   5   5  -9    3.88    0.48 
  -5  -5  -9    3.74    1.03 
  -5   5   9    3.76    0.66 
  -5   5  -9    4.00    0.51 
  -5   5  -9    3.18    0.54 
   5  -5  -9    2.72    0.46 
  -5   5  -9    3.52    0.74 
   5   5   9    3.01    0.54 
  -6   5   9    3.17    0.63 
   6   5  -9    2.79    0.45 
   6   5   9    2.69    0.54 
  -6   5  -9    2.63    0.56 
  -7  -5  -9    0.22    0.62 
   7   5  -9   -0.17    0.33 
  -7   5  -9    0.36    0.50 
  -8  -5  -9    1.19    0.87 
   8   5  -9    0.60    0.43 
   8   5  -9    0.85    0.36 
  -8   5   9    0.66    0.64 
  -8   5  -9    1.21    0.48 
   8   5   9    0.36    0.55 
  -8   5  -9    1.07    0.79 
   8  -5  -9    1.01    0.52 
  -9   5   9    0.28    0.78 
   9   5  -9    1.22    0.49 
  -9  -5  -9    0.97    0.92 
   9   5  -9    1.40    0.49 
   9  -5  -9    0.85    0.58 
  -9   5  -9    1.53    0.58 
  -9   5  -9    0.54    0.81 
   9   5   9    0.64    0.65 
 -10   5   9    1.44    0.86 
 -10  -5  -9    3.10    0.97 
  10   5  -9    0.48    0.60 
  10   5  -9    1.58    0.55 
 -10   5  -9    2.58    0.71 
 -10   5  -9    0.51    1.00 
  10  -5  -9   -0.16    0.70 
  10   5   9    0.98    0.75 
   0   6  -9    1.27    0.47 
   0   6   9    1.19    0.39 
   0   6   9    1.45    0.37 
   0  -6  -9    1.27    0.51 
   0  -6  -9    1.13    0.32 
  -1  -6  -9    8.88    0.84 
  -1  -6  -9    8.62    0.62 
   1   6  -9    9.57    0.68 
  -1   6   9    9.43    0.85 
  -1   6   9    9.03    0.77 
   1   6   9    8.89    0.84 
  -1   6  -9    9.18    0.62 
   1   6   9    8.56    0.68 
  -1   6  -9    9.26    0.80 
   1  -6  -9    9.11    0.65 
  -2  -6  -9   14.68    1.01 
   2   6  -9   14.63    0.77 
  -2   6   9   15.84    1.01 
   2   6  -9   15.63    0.78 
  -2   6  -9   15.13    1.17 
   2  -6  -9   15.19    1.14 
   2   6   9   14.66    0.84 
  -2   6  -9   15.85    0.83 
   2   6   9   14.69    1.02 
   2  -6  -9   14.71    0.85 
  -3  -6  -9   28.11    1.42 
  -3   6   9   27.71    1.42 
   3   6  -9   26.40    1.04 
   3   6  -9   27.97    1.05 
   3   6  -9   28.50    1.15 
   3  -6  -9   29.61    1.24 
  -3   6  -9   27.19    1.09 
  -3   6  -9   27.67    1.41 
   3   6   9   28.52    1.43 
  -3   6  -9   28.36    1.24 
   4   6  -9   10.25    0.73 
  -4   6   9   10.16    1.04 
  -4   6  -9    9.47    0.86 
   4   6   9   10.00    0.94 
   4  -6  -9    8.87    0.71 
  -4   6  -9    9.46    0.94 
  -5   6   9    2.81    0.61 
   5   6  -9    2.80    0.46 
   5  -6  -9    3.82    0.61 
  -5   6  -9    3.12    0.70 
   5   6   9    3.22    0.54 
  -5   6  -9    2.96    0.54 
  -6   6   9    5.51    0.97 
   6   6  -9    4.54    0.62 
   7   6  -9    2.12    0.43 
  -7   6   9    1.74    0.92 
  -7  -6  -9    2.37    0.74 
   7   6  -9    1.30    0.35 
   7  -6  -9    1.81    0.50 
   7   6   9    1.49    0.56 
  -7   6  -9    1.64    0.50 
   8   6  -9    3.83    0.55 
  -8  -6  -9    4.84    1.14 
   8   6  -9    5.68    0.80 
  -8   6  -9    5.31    0.93 
   8  -6  -9    3.98    0.66 
  -8   6  -9    5.00    0.97 
  -9   6   9    1.89    0.87 
   9   6  -9    2.17    0.51 
  -9  -6  -9    2.89    1.65 
   9   6  -9    1.70    0.62 
  -9   6  -9    3.17    0.67 
   9   6   9    1.93    0.70 
  -9   6  -9    2.38    0.93 
   9  -6  -9    2.01    0.66 
 -10   6   9    1.56    1.07 
  10   6  -9    1.37    0.68 
  10   6  -9    1.02    0.62 
 -10  -6  -9    1.61    0.98 
  10  -6  -9    1.90    1.00 
  10   6   9    1.10    0.72 
   0  -7  -9   -0.17    0.31 
   0   7   9    0.66    0.39 
   0   7   9    0.25    0.36 
   0  -7  -9   -0.02    0.46 
  -1  -7  -9   27.98    1.14 
  -1   7   9   29.20    1.40 
  -1   7   9   26.99    1.73 
  -1  -7  -9   28.61    1.40 
   1   7   9   27.08    1.38 
   1   7   9   26.91    1.23 
  -1   7  -9   26.47    1.18 
   1  -7  -9   25.81    1.33 
  -2  -7  -9    1.13    0.33 
  -2   7   9    1.13    0.51 
   2   7  -9    1.42    0.33 
  -2  -7  -9    1.35    0.57 
  -2   7  -9    1.27    0.39 
   2  -7  -9    1.21    0.56 
   2  -7  -9    0.80    0.37 
   2   7   9    1.41    0.39 
   2   7   9    1.11    0.40 
   3   7  -9   44.35    1.62 
   3   7  -9   40.48    1.49 
  -3  -7  -9   39.59    2.03 
  -3   7   9   42.99    1.82 
   3  -7  -9   38.56    1.58 
  -3   7  -9   38.62    1.40 
  -3   7  -9   39.93    1.61 
  -3   7  -9   39.93    1.79 
   4   7  -9    8.35    0.49 
   4   7  -9    5.86    0.64 
  -4   7   9    6.41    0.92 
  -4   7  -9    7.21    0.89 
   4  -7  -9    6.33    0.67 
  -4   7  -9    6.72    0.82 
  -5   7   9    7.74    1.02 
   5   7  -9    9.02    0.73 
  -5   7  -9    8.86    0.98 
   5  -7  -9    8.81    0.77 
  -5   7  -9    8.11    1.09 
   6   7  -9    0.33    0.36 
  -6  -7  -9    0.90    0.57 
   6   7  -9    0.70    0.32 
  -6   7  -9    0.78    0.52 
  -6   7  -9    1.04    0.76 
   6   7   9    0.98    0.49 
   7   7  -9    1.00    0.36 
  -7  -7  -9    1.92    0.78 
  -7   7   9    1.67    0.72 
   7  -7  -9    0.95    0.54 
  -7   7  -9    1.82    0.53 
  -7   7  -9    0.73    1.20 
   7   7   9    1.50    0.57 
  -8   7   9    0.56    0.73 
  -8  -7  -9    0.42    0.78 
   8   7  -9    1.17    0.44 
   8   7  -9    1.32    0.45 
   8   7   9    0.46    0.62 
   8  -7  -9    1.23    0.57 
  -8   7  -9    0.21    0.53 
  -8   7  -9    0.97    0.80 
   9   7  -9   -0.37    0.46 
   9   7  -9    0.87    0.88 
  -9   7   9    0.64    0.82 
  -9  -7  -9    1.52    0.93 
   9   7   9    0.38    0.70 
   9  -7  -9    0.04    0.61 
  -9   7  -9    1.24    0.73 
  -9   7  -9   -0.58    0.85 
  10   7  -9   -0.08    0.68 
  10   7  -9    0.58    0.56 
 -10  -7  -9    1.11    1.01 
 -10   7   9   -0.96    0.96 
  10   7   9    1.12    0.88 
  10  -7  -9    0.04    0.70 
 -10   7  -9    0.59    0.73 
 -10   7  -9   -0.82    1.23 
   0   8   9    1.69    0.51 
   0   8  -9    2.36    0.45 
   0   8   9    1.39    0.45 
   0  -8  -9    2.30    0.42 
   0  -8  -9    1.34    0.59 
  -1   8   9    7.21    0.86 
   1   8  -9    7.94    0.59 
  -1  -8  -9    7.90    0.63 
  -1  -8  -9    7.87    0.86 
   1  -8  -9    6.57    0.83 
   1  -8  -9    6.31    0.76 
   1   8   9    8.14    0.86 
  -1   8  -9    7.69    0.74 
   1   8   9    8.19    0.87 
  -2  -8  -9    3.83    0.55 
  -2  -8  -9    3.82    0.71 
  -2   8   9    3.10    0.61 
   2   8  -9    3.39    0.41 
  -2   8   9    3.74    0.55 
   2  -8  -9    4.43    0.71 
  -2   8  -9    3.34    0.51 
   2  -8  -9    4.01    0.50 
   2   8   9    4.19    0.78 
   2   8   9    4.33    0.78 
  -3   8   9   11.21    1.05 
   3   8  -9   11.31    1.00 
   3   8  -9   10.65    0.70 
   3  -8  -9   10.81    0.77 
  -3   8  -9   10.29    0.92 
  -3   8  -9   13.12    0.52 
   4   8  -9    0.59    0.25 
  -4   8   9    0.23    0.53 
   4   8  -9    0.14    0.32 
  -4   8  -9    0.31    0.59 
   4  -8  -9    0.90    0.35 
   5   8  -9   27.69    1.26 
   5   8  -9   25.16    1.15 
  -5   8   9   23.48    1.44 
  -5   8  -9   24.35    1.39 
  -5   8  -9   26.22    1.84 
  -6   8   9    1.44    0.78 
   6   8  -9    2.92    0.47 
   6   8  -9    1.97    0.44 
  -6  -8  -9    3.40    0.80 
   6   8   9    2.19    0.63 
  -6   8  -9    2.80    0.75 
  -6   8  -9    1.55    0.57 
   6  -8  -9    2.88    0.51 
   7   8  -9    2.43    0.48 
   7   8  -9    2.94    0.49 
  -7  -8  -9    2.98    1.00 
  -7   8  -9    2.48    0.80 
   7  -8  -9    2.78    0.69 
   7   8   9    2.62    0.70 
  -7   8  -9    3.33    0.65 
   8   8  -9    5.63    0.76 
  -8   8   9    4.93    1.37 
  -8  -8  -9    5.38    1.30 
   8   8  -9    6.79    0.93 
   8   8   9    4.38    0.83 
  -8   8  -9    5.03    1.03 
   8  -8  -9    4.95    0.77 
  -8   8  -9    3.54    0.71 
  -9   8   9    2.81    0.99 
   9   8  -9    3.02    1.10 
  -9  -8  -9    4.50    1.06 
   9   8  -9    2.47    0.58 
  -9   8  -9    2.64    1.31 
  -9   8  -9    2.55    0.87 
   9   8   9    1.43    0.79 
   9  -8  -9    2.64    0.76 
   0   9   9   10.57    0.99 
   0  -9  -9   11.18    1.01 
   0   9   9   12.53    1.02 
   0   9  -9   11.67    1.02 
   0  -9  -9   12.61    0.81 
   0   9  -9   13.58    0.70 
   1   9  -9   15.88    0.80 
  -1   9   9   15.92    1.10 
  -1  -9  -9   14.99    0.84 
  -1   9   9   14.90    1.12 
  -1  -9  -9   15.26    1.08 
   1   9   9   15.83    1.07 
   1   9   9   16.63    1.13 
   1  -9  -9   15.72    1.13 
  -1   9  -9   15.08    0.72 
   1  -9  -9   15.80    0.90 
  -2   9   9    0.46    0.49 
  -2  -9  -9    0.30    0.33 
   2   9  -9    0.26    0.31 
  -2   9   9    1.05    0.39 
   2  -9  -9    0.84    0.54 
   2   9   9    0.30    0.38 
   2   9   9    1.08    0.48 
   2  -9  -9    0.49    0.34 
   3   9  -9    0.67    0.27 
   3   9  -9    0.81    0.31 
  -3   9   9    0.40    0.48 
  -3  -9  -9    1.04    0.37 
   3  -9  -9    0.61    0.35 
  -3   9  -9   -0.05    0.46 
   3   9   9    0.83    0.43 
   4   9  -9    3.86    0.52 
  -4   9   9    3.32    0.70 
   4   9  -9    3.00    0.43 
   4  -9  -9    3.02    0.50 
  -4   9  -9    2.98    0.61 
   5   9  -9    8.18    0.75 
  -5  -9  -9   10.13    1.10 
   5   9  -9    6.77    0.78 
  -5   9  -9    9.38    1.12 
  -5   9  -9    6.93    0.97 
   6   9  -9    1.47    0.48 
  -6   9   9    0.50    0.71 
   6   9   9    1.33    0.61 
  -6   9  -9    2.99    0.82 
   6  -9  -9    1.83    0.52 
  -6   9  -9    0.92    0.56 
   7   9  -9    2.07    0.48 
  -7   9   9    2.04    0.83 
   7   9  -9    2.38    0.46 
  -7  -9  -9    3.24    0.96 
  -7   9  -9    2.32    0.84 
   7  -9  -9    2.23    0.60 
  -7   9  -9    1.46    0.63 
   7   9   9    1.62    0.63 
   8   9  -9    0.68    0.46 
   8   9  -9    1.98    0.55 
  -8   9   9    1.63    0.90 
  -8  -9  -9    3.54    1.00 
  -8   9  -9    1.30    0.67 
  -8   9  -9    1.75    0.85 
   8  -9  -9    1.44    0.63 
   8   9   9    0.99    0.70 
  -9  -9  -9    1.38    1.01 
   9   9  -9    1.85    0.66 
   9   9  -9    0.59    0.51 
   9   9   9    0.76    1.09 
  -9   9  -9    0.14    0.73 
  -9   9  -9    0.20    0.97 
   0  10   9    2.73    0.54 
   0 -10  -9    3.65    0.72 
   0  10   9    2.85    0.56 
   0  10  -9    4.64    0.76 
   0  10  -9    2.63    0.49 
   1  10  -9    4.27    0.55 
  -1  10   9    4.64    0.82 
   1  10  -9    4.67    0.55 
  -1 -10  -9    5.58    0.63 
  -1  10   9    3.99    0.65 
  -1 -10  -9    4.23    0.80 
   1 -10  -9    5.25    0.81 
   1  10   9    4.66    0.86 
  -1  10  -9    4.93    0.77 
   1 -10  -9    4.06    0.64 
   1  10   9    4.59    0.85 
  -1  10  -9    4.04    0.47 
  -2 -10  -9    0.80    0.38 
   2  10  -9    1.01    0.34 
   2  10  -9    1.03    0.29 
  -2  10   9    1.37    0.56 
   2  10   9    0.46    0.47 
   2  10   9    1.02    0.44 
   2 -10  -9    1.33    0.38 
  -2  10  -9    0.90    0.25 
  -2  10  -9    0.86    0.43 
  -3  10   9    2.38    0.64 
  -3 -10  -9    3.52    0.47 
   3  10  -9    3.22    0.41 
   3  10  -9    3.74    0.59 
  -3  10  -9    3.05    0.58 
   3  10   9    3.24    0.61 
   3  10   9    4.36    0.74 
   3 -10  -9    4.32    0.67 
  -4 -10  -9   11.09    0.81 
   4  10  -9   11.87    0.85 
  -4 -10  -9   10.11    1.09 
   4  10  -9   10.09    0.68 
   4  10   9    7.93    1.09 
  -4  10  -9   10.22    1.03 
   4 -10  -9   10.22    0.85 
  -5  10   9   -0.46    0.62 
   5  10  -9    0.75    0.35 
   5  10  -9   -0.04    0.33 
  -5  10  -9   -0.61    0.53 
   5  10   9    0.00    0.54 
  -6  10   9    1.33    0.84 
   6  10  -9    1.46    0.47 
  -6 -10  -9    0.91    0.76 
   6  10  -9    1.38    0.45 
   6  10   9    0.54    0.58 
  -6  10  -9    0.90    0.63 
  -6  10  -9    2.29    0.83 
   6 -10  -9    1.07    0.61 
  -7 -10  -9    0.29    0.84 
   7  10  -9    1.09    0.47 
   7  10  -9   -0.03    0.42 
  -7  10   9   -0.61    0.81 
   7  10   9    0.12    0.63 
   7 -10  -9    0.28    0.57 
  -7  10  -9   -0.65    0.66 
  -7  10  -9    0.88    0.78 
  -8  10   9    0.40    0.92 
  -8 -10  -9    2.53    1.05 
   8  10  -9    2.03    0.63 
   8  10   9    1.35    0.94 
   0 -11  -9   11.80    1.20 
   0  11  -9   11.16    1.03 
   0  11  -9   11.99    0.80 
   0  11   9   11.91    1.12 
   0  11   9   11.04    1.08 
  -1 -11  -9    1.20    0.42 
   1  11  -9    1.05    0.31 
  -1  11   9    1.65    0.61 
  -1 -11  -9    0.67    0.59 
   1 -11  -9    2.26    0.42 
   1 -11  -9    1.79    0.75 
   1  11   9    1.58    0.55 
  -1  11  -9    1.34    0.48 
   1  11   9    1.60    0.56 
  -1  11  -9    1.33    0.33 
   2  11  -9   13.95    0.77 
  -2 -11  -9   13.80    0.85 
   2  11  -9   14.18    0.86 
  -2  11   9   14.36    1.16 
   2  11   9   15.03    1.26 
  -2  11  -9   13.39    0.75 
   2  11   9   13.54    1.21 
   2 -11  -9   13.52    0.89 
  -2  11  -9   15.17    1.11 
   3  11  -9    3.87    0.56 
  -3 -11  -9    3.63    0.46 
   3  11  -9    4.27    0.67 
  -3 -11  -9    3.94    1.08 
   3  11   9    2.65    0.62 
   3 -11  -9    4.90    0.64 
   3  11   9    4.03    0.72 
  -3  11  -9    4.56    0.71 
  -4 -11  -9    4.72    0.68 
  -4 -11  -9    3.30    0.87 
   4  11  -9    3.67    0.58 
  -4  11   9    2.87    0.85 
   4  11  -9    4.25    0.71 
   4  11   9    3.26    0.68 
  -4  11  -9    3.59    0.70 
  -5  11   9   -0.78    1.47 
  -5 -11  -9    0.52    0.76 
  -5 -11  -9    0.70    0.48 
   5  11   9   -0.33    0.54 
   5 -11  -9   -0.04    0.46 
  -5  11  -9   -0.37    0.59 
  -6 -11  -9    0.41    0.86 
  -6  11   9    0.05    1.21 
   6  11  -9    0.60    0.41 
   6  11   9    0.88    0.65 
  -6  11  -9    1.56    0.73 
  -6  11  -9    0.74    0.72 
   6 -11  -9    1.56    0.61 
  -7  11   9    0.36    0.87 
  -7 -11  -9   -0.36    0.91 
   7  11  -9    1.39    0.53 
  -7  11  -9    1.43    0.99 
   7  11   9   -0.05    0.69 
   7 -11  -9    0.43    0.60 
   8  11  -9    0.12    0.52 
   8 -11  -9    0.55    0.71 
   8  11   9    1.00    0.78 
   0  12   9    2.99    0.98 
   0 -12  -9    2.74    0.79 
   0  12  -9    5.28    0.99 
   0 -12  -9    3.62    1.57 
   1  12  -9    2.62    0.41 
  -1  12   9    3.06    0.60 
   1  12  -9    5.50    0.98 
  -1 -12  -9    3.65    0.51 
   1  12  -9    3.63    0.57 
   1 -12  -9    3.13    0.53 
   1  12   9    2.80    0.63 
  -1  12  -9    3.07    0.65 
  -1  12  -9    2.78    0.44 
  -2  12   9    1.59    0.83 
  -2 -12  -9    1.24    0.41 
   2  12  -9    2.00    0.36 
  -2  12   9    1.41    0.51 
  -2 -12  -9    2.28    0.80 
   2  12  -9    1.71    0.37 
   2  12   9    1.66    0.75 
   2 -12  -9    2.01    0.45 
  -2  12  -9    1.35    0.55 
  -3 -12  -9    3.17    0.82 
  -3 -12  -9    1.67    0.44 
  -3  12   9    2.20    0.82 
   3  12  -9    1.37    0.39 
  -3  12  -9    1.10    0.68 
   3  12   9    1.53    0.59 
   3  12   9    1.79    1.14 
   3 -12  -9    1.41    0.45 
  -4 -12  -9    3.73    0.93 
   4  12  -9    2.17    0.46 
  -4  12   9    1.82    1.02 
   4  12   9    2.22    0.61 
   4  12   9    1.90    0.63 
  -4  12  -9    1.88    0.68 
  -5 -12  -9    2.64    0.94 
   5  12  -9    2.08    0.55 
  -5  12   9    0.54    0.94 
   5  12   9    1.49    0.68 
  -5  12  -9   -0.05    0.73 
   5 -12  -9    1.83    0.58 
  -6 -12  -9    2.59    0.93 
  -6  12   9   -0.51    0.87 
   6  12  -9    0.55    0.44 
   6  12   9    0.88    0.71 
   6 -12  -9    0.57    0.63 
   7  12  -9    1.67    1.11 
  -7  12  -9    0.30    0.87 
  -7  12  -9    3.00    1.11 
   7  12   9    1.57    0.80 
   7 -12  -9    1.94    0.68 
   0  13   9    4.22    0.85 
   0  13  -9    5.25    0.65 
   0  13  -9    4.61    0.78 
   0  13  -9    3.96    0.56 
   0  13   9    4.40    0.93 
   0 -13  -9    5.25    0.89 
  -1 -13  -9    1.16    0.84 
   1  13  -9    2.34    0.60 
  -1  13   9    1.26    0.52 
  -1 -13  -9    1.90    0.47 
  -1  13   9    1.32    0.96 
   1  13  -9    1.57    0.65 
  -1  13  -9    1.15    0.44 
   1  13   9    0.30    0.71 
  -1  13  -9    0.82    0.61 
   1 -13  -9    1.60    0.44 
   1  13   9    0.92    0.68
[truncated: 165,576 more chars]
